# Supplementary material
Source: publisher figshare collection journal article supplement (https://acs.figshare.com/ndownloader/files/3850885)
Supplement: Supplementary file 1 [file 3850885]

data_sd_nh_f_0m
_audit_creation_date              2014-06-11
_audit_creation_method
;
Olex2 1.2
(compiled 2014.03.20 svn.r2914 for OlexSys, GUI svn.r4816)
;
_shelxl_version_number            2014-3
_publ_contact_author_name         'Dr. S. B. Mandal'
_publ_contact_author_address
; Chemistry Division
  CSIR-Indian Institute of Chemical Biology
  4, Raja S. C. Mullick Road
  Jadavpur
  Kolkata-700032
  India
;
_publ_contact_author_email        sbmandal@iicb.res.in
_publ_contact_author_fax          '91(033)2473-****'
_publ_contact_author_phone        '91(033)****-****'
_publ_section_references
;
Dolomanov, O.V., Bourhis, L.J., Gildea, R.J, Howard, J.A.K. & Puschmann, H.
 (2009), J. Appl. Cryst. 42, 339-341.

Sheldrick, G.M. (2008). Acta Cryst. A64, 112-122.
;
_chemical_name_common             'oxazocinyl acetate'
_chemical_name_systematic
;
(3S,5R,6aR,7aR,10aR,10bR)-1-benzyl-9,9-dimethyloctahydro-3,10b-methano
[1,3]dioxolo[4',5':4,5]furo[3,2-c][1,2]oxazocin-5-yl acetate
;
_chemical_formula_moiety          'C21 H27 N O6'
_chemical_formula_sum             'C21 H27 N O6'
_chemical_formula_weight          389.43
_chemical_absolute_configuration  rm
_chemical_melting_point           ?
loop_
  _atom_type_symbol
  _atom_type_description
  _atom_type_scat_dispersion_real
  _atom_type_scat_dispersion_imag
  _atom_type_scat_source
 'C' 'C' 0.0033 0.0016 'International Tables Vol C Tables 4.2.6.8 and 6.1.1.4'
 'H' 'H' 0.0000 0.0000 'International Tables Vol C Tables 4.2.6.8 and 6.1.1.4'
 'N' 'N' 0.0061 0.0033 'International Tables Vol C Tables 4.2.6.8 and 6.1.1.4'
 'O' 'O' 0.0106 0.0060 'International Tables Vol C Tables 4.2.6.8 and 6.1.1.4'

_shelx_space_group_comment
;
The symmetry employed for this shelxl refinement is uniquely defined
by the following loop, which should always be used as a source of
symmetry information in preference to the above space-group names.
They are only intended as comments.
;
_space_group_crystal_system       'monoclinic'
_space_group_IT_number            4
_space_group_name_H-M_alt         'P 1 21 1'
_space_group_name_Hall            'P 2yb'
loop_
  _space_group_symop_operation_xyz
 'x, y, z'
 '-x, y+1/2, -z'

_cell_length_a                    12.804(4)
_cell_length_b                    5.996(2)
_cell_length_c                    13.750(5)
_cell_angle_alpha                 90
_cell_angle_beta                  108.29(2)
_cell_angle_gamma                 90
_cell_volume                      1002.4(6)
_cell_formula_units_Z             2
_cell_measurement_reflns_used     4034
_cell_measurement_temperature     296(2)
_cell_measurement_theta_max       22.25
_cell_measurement_theta_min       2.62
_shelx_estimated_absorpt_T_max    ?
_shelx_estimated_absorpt_T_min    ?
_exptl_absorpt_coefficient_mu     0.094
_exptl_absorpt_correction_T_max   0.7456
_exptl_absorpt_correction_T_min   0.6605
_exptl_absorpt_correction_type    multi-scan
_exptl_absorpt_process_details
;
SADABS-2012/1 (Bruker,2012) was used for absorption correction.
wR2(int) was 0.1286 before and 0.0639 after correction.
The Ratio of minimum to maximum transmission is 0.8859.
The \l/2 correction factor is 0.0015.
;
_exptl_crystal_colour             ?
_exptl_crystal_density_diffrn     1.290
_exptl_crystal_density_meas       ?
_exptl_crystal_density_method     ?
_exptl_crystal_description        ?
_exptl_crystal_F_000              416
_exptl_crystal_size_max           0.18
_exptl_crystal_size_mid           0.15
_exptl_crystal_size_min           0.14
_exptl_special_details
;
 ?
;
_exptl_transmission_factor_max    ?
_exptl_transmission_factor_min    ?
_diffrn_reflns_av_R_equivalents   0.0460
_diffrn_reflns_av_unetI/netI      0.0523
_diffrn_reflns_Laue_measured_fraction_full 0.935
_diffrn_reflns_Laue_measured_fraction_max 0.947
_diffrn_reflns_limit_h_max        16
_diffrn_reflns_limit_h_min        -16
_diffrn_reflns_limit_k_max        7
_diffrn_reflns_limit_k_min        -5
_diffrn_reflns_limit_l_max        17
_diffrn_reflns_limit_l_min        -17
_diffrn_reflns_number             11748
_diffrn_reflns_point_group_measured_fraction_full 0.836
_diffrn_reflns_point_group_measured_fraction_max 0.838
_diffrn_reflns_theta_full         25.242
_diffrn_reflns_theta_max          27.770
_diffrn_reflns_theta_min          1.675
_diffrn_ambient_temperature       296.15
_diffrn_detector_area_resol_mean  ?
_diffrn_measured_fraction_theta_full 0.935
_diffrn_measured_fraction_theta_max 0.947
_diffrn_measurement_device_type   'Bruker APEX-II CCD'
_diffrn_measurement_method        '\f and \w scans'
_diffrn_radiation_type            MoK\a
_diffrn_radiation_wavelength      0.71073
_diffrn_source                    ?
_diffrn_standards_number          0
_reflns_Friedel_coverage          0.617
_reflns_Friedel_fraction_full     0.713
_reflns_Friedel_fraction_max      0.707
_reflns_number_gt                 2558
_reflns_number_total              3963
_reflns_special_details
;
 Reflections were merged by SHELXL according to the crystal
 class for the calculation of statistics and refinement.
 
 _reflns_Friedel_fraction is defined as the number of unique
 Friedel pairs measured divided by the number that would be
 possible theoretically, ignoring centric projections and
 systematic absences.
;
_reflns_threshold_expression      'I > 2\s(I)'
_computing_data_collection        'Bruker SMART' 
_computing_cell_refinement        'Bruker SMART'
_computing_data_reduction         'Bruker SAINT'
_computing_molecular_graphics     'Olex2 (Dolomanov et al., 2009)'
_computing_publication_material   'Olex2 (Dolomanov et al., 2009)'
_computing_structure_refinement   'ShelXL (Sheldrick, 2008)'
_computing_structure_solution     'ShelXS (Sheldrick, 2008)'
_refine_diff_density_max          0.205
_refine_diff_density_min          -0.233
_refine_diff_density_rms          0.064
_refine_ls_abs_structure_details
;
 Flack x determined using 731 quotients [(I+)-(I-)]/[(I+)+(I-)]
 (Parsons, Flack and Wagner, Acta Cryst. B69 (2013) 249-259).
;
_refine_ls_abs_structure_Flack    -1.2(10)
_refine_ls_extinction_coef        0.027(7)
_refine_ls_extinction_expression  'Fc^*^=kFc[1+0.001xFc^2^\l^3^/sin(2\q)]^-1/4^'
_refine_ls_extinction_method      SHELXL
_refine_ls_goodness_of_fit_ref    1.085
_refine_ls_hydrogen_treatment     constr
_refine_ls_matrix_type            full
_refine_ls_number_parameters      257
_refine_ls_number_reflns          3963
_refine_ls_number_restraints      1
_refine_ls_R_factor_all           0.0883
_refine_ls_R_factor_gt            0.0574
_refine_ls_restrained_S_all       1.084
_refine_ls_shift/su_max           0.000
_refine_ls_shift/su_mean          0.000
_refine_ls_structure_factor_coef  Fsqd
_refine_ls_weighting_details
'w=1/[\s^2^(Fo^2^)+(0.0890P)^2^+0.1706P] where P=(Fo^2^+2Fc^2^)/3'
_refine_ls_weighting_scheme       calc
_refine_ls_wR_factor_gt           0.1487
_refine_ls_wR_factor_ref          0.1965
_refine_special_details
;
 ?
;
_olex2_refinement_description
;
1. Fixed Uiso
 At 1.2 times of:
  All C(H) groups, All C(H,H) groups
 At 1.5 times of:
  All C(H,H,H) groups
2.a Ternary CH refined with riding coordinates:
 C2(H2), C4(H4), C6(H6), C9(H9), C10(H10)
2.b Secondary CH2 refined with riding coordinates:
 C3(H3A,H3B), C5(H5A,H5B), C7(H7A,H7B), C8(H8A,H8B)
2.c Aromatic/amide H refined with riding coordinates:
 C15(H15), C16(H16), C17(H17), C18(H18), C19(H19)
2.d Idealised Me refined as rotating group:
 C12(H12A,H12B,H12C), C13(H13A,H13B,H13C), C21(H21A,H21B,H21C)
;
_atom_sites_solution_hydrogens    geom
_atom_sites_solution_primary      direct
_atom_sites_solution_secondary    ?
loop_
  _atom_site_label
  _atom_site_type_symbol
  _atom_site_fract_x
  _atom_site_fract_y
  _atom_site_fract_z
  _atom_site_U_iso_or_equiv
  _atom_site_adp_type
  _atom_site_occupancy
  _atom_site_site_symmetry_order
  _atom_site_calc_flag
  _atom_site_refinement_flags_posn
  _atom_site_refinement_flags_adp
  _atom_site_refinement_flags_occupancy
  _atom_site_disorder_assembly
  _atom_site_disorder_group
 C1 C -0.9278(3) -0.3006(7) -0.2168(3) 0.0429(9) Uani 1 1 d . . . . .
 C2 C -1.0015(3) -0.1822(7) -0.3132(3) 0.0448(9) Uani 1 1 d . . . . .
 H2 H -0.9536 -0.0921 -0.3410 0.054 Uiso 1 1 calc R . . . .
 C3 C -1.0955(3) -0.0363(8) -0.3087(3) 0.0512(10) Uani 1 1 d . . . . .
 H3A H -1.1383 0.0017 -0.3783 0.061 Uiso 1 1 calc R . . . .
 H3B H -1.0648 0.1014 -0.2745 0.061 Uiso 1 1 calc R . . . .
 C4 C -1.1736(3) -0.1292(8) -0.2556(3) 0.0537(11) Uani 1 1 d . . . . .
 H4 H -1.1959 -0.2808 -0.2801 0.064 Uiso 1 1 calc R . . . .
 C5 C -1.1314(3) -0.1269(9) -0.1399(3) 0.0562(11) Uani 1 1 d . . . . .
 H5A H -1.1821 -0.2100 -0.1140 0.067 Uiso 1 1 calc R . . . .
 H5B H -1.1306 0.0260 -0.1165 0.067 Uiso 1 1 calc R . . . .
 C6 C -1.0176(4) -0.2243(8) -0.0947(3) 0.0512(10) Uani 1 1 d . . . . .
 H6 H -1.0070 -0.2713 -0.0240 0.061 Uiso 1 1 calc R . . . .
 C7 C -0.9918(4) -0.4177(7) -0.1546(3) 0.0512(10) Uani 1 1 d . . . . .
 H7A H -1.0584 -0.4864 -0.1987 0.061 Uiso 1 1 calc R . . . .
 H7B H -0.9473 -0.5298 -0.1094 0.061 Uiso 1 1 calc R . . . .
 C8 C -0.7651(3) -0.2287(8) -0.0670(3) 0.0517(10) Uani 1 1 d . . . . .
 H8A H -0.7218 -0.3170 -0.0994 0.062 Uiso 1 1 calc R . . . .
 H8B H -0.7906 -0.3266 -0.0230 0.062 Uiso 1 1 calc R . . . .
 C9 C -0.8671(4) -0.4669(8) -0.2646(3) 0.0526(10) Uani 1 1 d . . . . .
 H9 H -0.8457 -0.6038 -0.2243 0.063 Uiso 1 1 calc R . . . .
 C10 C -0.9506(3) -0.5087(8) -0.3719(3) 0.0516(10) Uani 1 1 d . . . . .
 H10 H -0.9731 -0.6655 -0.3814 0.062 Uiso 1 1 calc R . . . .
 C11 C -0.7800(4) -0.4255(9) -0.3856(4) 0.0616(12) Uani 1 1 d . . . . .
 C12 C -0.7237(6) -0.6484(14) -0.3812(5) 0.105(3) Uani 1 1 d . . . . .
 H12A H -0.7538 -0.7529 -0.3442 0.157 Uiso 1 1 calc GR . . . .
 H12B H -0.6463 -0.6317 -0.3470 0.157 Uiso 1 1 calc GR . . . .
 H12C H -0.7353 -0.7024 -0.4495 0.157 Uiso 1 1 calc GR . . . .
 C13 C -0.7307(6) -0.2433(13) -0.4299(6) 0.100(2) Uani 1 1 d . . . . .
 H13A H -0.6569 -0.2160 -0.3865 0.150 Uiso 1 1 calc GR . . . .
 H13B H -0.7736 -0.1102 -0.4349 0.150 Uiso 1 1 calc GR . . . .
 H13C H -0.7296 -0.2859 -0.4968 0.150 Uiso 1 1 calc GR . . . .
 C14 C -0.6946(3) -0.0492(8) -0.0037(3) 0.0486(10) Uani 1 1 d . . . . .
 C15 C -0.6566(4) -0.0667(10) 0.1015(4) 0.0667(14) Uani 1 1 d . . . . .
 H15 H -0.6780 -0.1857 0.1343 0.080 Uiso 1 1 calc R . . . .
 C16 C -0.5850(5) 0.0979(12) 0.1586(4) 0.0822(17) Uani 1 1 d . . . . .
 H16 H -0.5611 0.0889 0.2297 0.099 Uiso 1 1 calc R . . . .
 C17 C -0.5507(5) 0.2670(11) 0.1131(5) 0.0852(18) Uani 1 1 d . . . . .
 H17 H -0.5003 0.3692 0.1525 0.102 Uiso 1 1 calc R . . . .
 C18 C -0.5890(4) 0.2905(11) 0.0093(5) 0.0796(16) Uani 1 1 d . . . . .
 H18 H -0.5674 0.4115 -0.0222 0.096 Uiso 1 1 calc R . . . .
 C19 C -0.6601(4) 0.1329(10) -0.0486(4) 0.0635(12) Uani 1 1 d . . . . .
 H19 H -0.6856 0.1485 -0.1194 0.076 Uiso 1 1 calc R . . . .
 C20 C -1.3605(4) -0.0499(12) -0.3541(4) 0.0671(14) Uani 1 1 d . . . . .
 C21 C -1.4482(4) 0.1219(14) -0.3755(4) 0.0875(19) Uani 1 1 d . . . . .
 H21A H -1.5002 0.0962 -0.4420 0.131 Uiso 1 1 calc GR . . . .
 H21B H -1.4160 0.2671 -0.3737 0.131 Uiso 1 1 calc GR . . . .
 H21C H -1.4850 0.1135 -0.3246 0.131 Uiso 1 1 calc GR . . . .
 N1 N -0.8606(3) -0.1341(6) -0.1463(2) 0.0457(8) Uani 1 1 d . . . . .
 O1 O -0.9371(2) -0.0512(5) -0.0955(2) 0.0531(8) Uani 1 1 d . . . . .
 O2 O -1.0416(2) -0.3655(5) -0.3823(2) 0.0534(7) Uani 1 1 d . . . . .
 O3 O -0.7772(2) -0.3597(7) -0.2849(2) 0.0661(10) Uani 1 1 d . . . . .
 O4 O -0.8937(3) -0.4430(6) -0.4401(2) 0.0600(8) Uani 1 1 d . . . . .
 O5 O -1.2694(2) 0.0176(6) -0.2828(3) 0.0670(10) Uani 1 1 d . . . . .
 O6 O -1.3683(4) -0.2259(10) -0.3942(3) 0.1026(16) Uani 1 1 d . . . . .

loop_
  _atom_site_aniso_label
  _atom_site_aniso_U_11
  _atom_site_aniso_U_22
  _atom_site_aniso_U_33
  _atom_site_aniso_U_23
  _atom_site_aniso_U_13
  _atom_site_aniso_U_12
 C1 0.042(2) 0.048(2) 0.038(2) -0.0025(16) 0.0116(17) 0.0026(16)
 C2 0.042(2) 0.051(2) 0.041(2) -0.0033(17) 0.0122(16) -0.0031(18)
 C3 0.049(2) 0.058(2) 0.043(2) 0.002(2) 0.0092(17) 0.009(2)
 C4 0.042(2) 0.057(2) 0.057(3) -0.006(2) 0.0085(19) 0.007(2)
 C5 0.046(2) 0.069(3) 0.055(2) -0.005(2) 0.018(2) -0.002(2)
 C6 0.052(2) 0.059(2) 0.043(2) 0.004(2) 0.0151(18) 0.004(2)
 C7 0.053(2) 0.050(2) 0.049(2) 0.0047(19) 0.0124(19) -0.0005(19)
 C8 0.045(2) 0.056(2) 0.047(2) -0.006(2) 0.0038(18) 0.0056(19)
 C9 0.061(3) 0.050(2) 0.046(2) 0.0000(18) 0.016(2) 0.012(2)
 C10 0.059(2) 0.047(2) 0.051(2) -0.0035(19) 0.022(2) 0.001(2)
 C11 0.059(3) 0.069(3) 0.064(3) -0.025(2) 0.029(2) -0.006(2)
 C12 0.113(5) 0.116(6) 0.094(5) -0.022(4) 0.046(4) 0.044(5)
 C13 0.110(5) 0.102(5) 0.110(5) -0.043(4) 0.066(4) -0.047(4)
 C14 0.0380(19) 0.056(2) 0.048(2) -0.002(2) 0.0076(17) 0.0046(19)
 C15 0.063(3) 0.079(4) 0.052(3) -0.004(3) 0.011(2) 0.001(3)
 C16 0.079(4) 0.100(5) 0.056(3) -0.013(3) 0.003(3) -0.008(4)
 C17 0.064(3) 0.078(4) 0.098(4) -0.017(4) 0.004(3) -0.010(3)
 C18 0.049(3) 0.068(3) 0.114(5) 0.012(3) 0.014(3) -0.002(3)
 C19 0.047(2) 0.074(3) 0.062(3) 0.013(3) 0.007(2) 0.012(2)
 C20 0.046(2) 0.100(4) 0.050(3) 0.005(3) 0.008(2) 0.005(3)
 C21 0.050(3) 0.122(5) 0.082(4) 0.006(4) 0.007(3) 0.019(4)
 N1 0.0385(16) 0.0542(19) 0.0414(18) -0.0058(15) 0.0082(13) 0.0079(14)
 O1 0.0471(15) 0.0587(18) 0.0541(17) -0.0089(15) 0.0166(13) 0.0050(15)
 O2 0.0512(16) 0.0588(17) 0.0450(15) -0.0129(14) 0.0076(13) -0.0009(15)
 O3 0.0525(18) 0.086(2) 0.063(2) -0.0271(19) 0.0222(16) -0.0027(19)
 O4 0.0604(18) 0.070(2) 0.0525(17) -0.0092(15) 0.0227(14) -0.0078(16)
 O5 0.0382(15) 0.081(2) 0.073(2) -0.0135(19) 0.0050(15) 0.0083(16)
 O6 0.073(3) 0.119(4) 0.089(3) -0.027(3) -0.013(2) 0.001(3)

_geom_special_details
;
 All esds (except the esd in the dihedral angle between two l.s. planes)
 are estimated using the full covariance matrix.  The cell esds are taken
 into account individually in the estimation of esds in distances, angles
 and torsion angles; correlations between esds in cell parameters are only
 used when they are defined by crystal symmetry.  An approximate (isotropic)
 treatment of cell esds is used for estimating esds involving l.s. planes.
;
loop_
  _geom_bond_atom_site_label_1
  _geom_bond_atom_site_label_2
  _geom_bond_distance
  _geom_bond_site_symmetry_2
  _geom_bond_publ_flag
 C1 C2 1.538(5) . ?
 C1 C7 1.528(6) . ?
 C1 C9 1.534(5) . ?
 C1 N1 1.467(5) . ?
 C2 C3 1.505(6) . ?
 C2 O2 1.438(5) . ?
 C3 C4 1.518(6) . ?
 C4 C5 1.511(6) . ?
 C4 O5 1.460(5) . ?
 C5 C6 1.511(6) . ?
 C6 C7 1.517(6) . ?
 C6 O1 1.465(6) . ?
 C8 C14 1.497(6) . ?
 C8 N1 1.472(5) . ?
 C9 C10 1.546(6) . ?
 C9 O3 1.420(6) . ?
 C10 O2 1.418(5) . ?
 C10 O4 1.412(5) . ?
 C11 C12 1.511(9) . ?
 C11 C13 1.485(8) . ?
 C11 O3 1.430(5) . ?
 C11 O4 1.417(6) . ?
 C14 C15 1.378(6) . ?
 C14 C19 1.393(7) . ?
 C15 C16 1.407(8) . ?
 C16 C17 1.336(9) . ?
 C17 C18 1.364(9) . ?
 C18 C19 1.378(8) . ?
 C20 C21 1.484(8) . ?
 C20 O5 1.329(6) . ?
 C20 O6 1.180(8) . ?
 N1 O1 1.457(4) . ?

loop_
  _geom_angle_atom_site_label_1
  _geom_angle_atom_site_label_2
  _geom_angle_atom_site_label_3
  _geom_angle
  _geom_angle_site_symmetry_1
  _geom_angle_site_symmetry_3
  _geom_angle_publ_flag
 C7 C1 C2 113.7(3) . . ?
 C7 C1 C9 112.0(4) . . ?
 C9 C1 C2 100.7(3) . . ?
 N1 C1 C2 109.2(3) . . ?
 N1 C1 C7 104.4(3) . . ?
 N1 C1 C9 117.1(3) . . ?
 C3 C2 C1 121.0(3) . . ?
 O2 C2 C1 102.3(3) . . ?
 O2 C2 C3 110.3(3) . . ?
 C2 C3 C4 117.6(4) . . ?
 C5 C4 C3 115.5(4) . . ?
 O5 C4 C3 106.4(4) . . ?
 O5 C4 C5 105.0(3) . . ?
 C4 C5 C6 114.2(3) . . ?
 C5 C6 C7 114.7(4) . . ?
 O1 C6 C5 108.2(4) . . ?
 O1 C6 C7 105.3(3) . . ?
 C6 C7 C1 101.5(3) . . ?
 N1 C8 C14 111.3(4) . . ?
 C1 C9 C10 102.9(3) . . ?
 O3 C9 C1 109.9(4) . . ?
 O3 C9 C10 104.3(3) . . ?
 O2 C10 C9 107.4(3) . . ?
 O4 C10 C9 104.0(3) . . ?
 O4 C10 O2 110.0(4) . . ?
 C13 C11 C12 114.1(5) . . ?
 O3 C11 C12 109.8(5) . . ?
 O3 C11 C13 108.0(4) . . ?
 O4 C11 C12 110.7(5) . . ?
 O4 C11 C13 109.7(5) . . ?
 O4 C11 O3 104.0(3) . . ?
 C15 C14 C8 120.4(4) . . ?
 C15 C14 C19 118.0(4) . . ?
 C19 C14 C8 121.6(4) . . ?
 C14 C15 C16 119.0(5) . . ?
 C17 C16 C15 121.6(5) . . ?
 C16 C17 C18 120.4(6) . . ?
 C17 C18 C19 119.3(6) . . ?
 C18 C19 C14 121.7(5) . . ?
 O5 C20 C21 111.6(6) . . ?
 O6 C20 C21 125.4(5) . . ?
 O6 C20 O5 122.9(5) . . ?
 C1 N1 C8 113.9(3) . . ?
 O1 N1 C1 101.9(3) . . ?
 O1 N1 C8 107.7(3) . . ?
 N1 O1 C6 110.0(3) . . ?
 C10 O2 C2 106.5(3) . . ?
 C9 O3 C11 106.8(3) . . ?
 C10 O4 C11 109.2(3) . . ?
 C20 O5 C4 118.5(4) . . ?

loop_
  _geom_torsion_atom_site_label_1
  _geom_torsion_atom_site_label_2
  _geom_torsion_atom_site_label_3
  _geom_torsion_atom_site_label_4
  _geom_torsion
  _geom_torsion_site_symmetry_1
  _geom_torsion_site_symmetry_2
  _geom_torsion_site_symmetry_3
  _geom_torsion_site_symmetry_4
  _geom_torsion_publ_flag
 C1 C2 C3 C4 -48.5(5) . . . . ?
 C1 C2 O2 C10 -42.6(4) . . . . ?
 C1 C9 C10 O2 4.3(4) . . . . ?
 C1 C9 C10 O4 120.9(4) . . . . ?
 C1 C9 O3 C11 -134.8(4) . . . . ?
 C1 N1 O1 C6 27.6(4) . . . . ?
 C2 C1 C7 C6 -80.8(4) . . . . ?
 C2 C1 C9 C10 -28.5(4) . . . . ?
 C2 C1 C9 O3 82.2(4) . . . . ?
 C2 C1 N1 C8 -162.8(3) . . . . ?
 C2 C1 N1 O1 81.6(3) . . . . ?
 C2 C3 C4 C5 77.2(5) . . . . ?
 C2 C3 C4 O5 -166.7(3) . . . . ?
 C3 C2 O2 C10 -172.6(3) . . . . ?
 C3 C4 C5 C6 -49.6(6) . . . . ?
 C3 C4 O5 C20 102.4(5) . . . . ?
 C4 C5 C6 C7 -34.5(6) . . . . ?
 C4 C5 C6 O1 82.8(5) . . . . ?
 C5 C4 O5 C20 -134.7(4) . . . . ?
 C5 C6 C7 C1 98.2(4) . . . . ?
 C5 C6 O1 N1 -126.8(3) . . . . ?
 C7 C1 C2 C3 46.6(5) . . . . ?
 C7 C1 C2 O2 -76.4(4) . . . . ?
 C7 C1 C9 C10 92.8(4) . . . . ?
 C7 C1 C9 O3 -156.6(3) . . . . ?
 C7 C1 N1 C8 75.2(4) . . . . ?
 C7 C1 N1 O1 -40.4(4) . . . . ?
 C7 C6 O1 N1 -3.7(4) . . . . ?
 C8 C14 C15 C16 176.2(5) . . . . ?
 C8 C14 C19 C18 -175.5(5) . . . . ?
 C8 N1 O1 C6 -92.5(4) . . . . ?
 C9 C1 C2 C3 166.6(4) . . . . ?
 C9 C1 C2 O2 43.5(4) . . . . ?
 C9 C1 C7 C6 165.8(3) . . . . ?
 C9 C1 N1 C8 -49.2(5) . . . . ?
 C9 C1 N1 O1 -164.9(3) . . . . ?
 C9 C10 O2 C2 24.0(4) . . . . ?
 C9 C10 O4 C11 15.4(5) . . . . ?
 C10 C9 O3 C11 -25.1(5) . . . . ?
 C12 C11 O3 C9 -83.6(5) . . . . ?
 C12 C11 O4 C10 86.7(5) . . . . ?
 C13 C11 O3 C9 151.4(5) . . . . ?
 C13 C11 O4 C10 -146.5(4) . . . . ?
 C14 C8 N1 C1 174.9(3) . . . . ?
 C14 C8 N1 O1 -72.9(4) . . . . ?
 C14 C15 C16 C17 -1.9(9) . . . . ?
 C15 C14 C19 C18 0.9(7) . . . . ?
 C15 C16 C17 C18 3.4(10) . . . . ?
 C16 C17 C18 C19 -2.6(9) . . . . ?
 C17 C18 C19 C14 0.5(8) . . . . ?
 C19 C14 C15 C16 -0.2(7) . . . . ?
 C21 C20 O5 C4 -177.8(4) . . . . ?
 N1 C1 C2 C3 -69.6(5) . . . . ?
 N1 C1 C2 O2 167.4(3) . . . . ?
 N1 C1 C7 C6 38.2(4) . . . . ?
 N1 C1 C9 C10 -146.7(3) . . . . ?
 N1 C1 C9 O3 -36.0(5) . . . . ?
 N1 C8 C14 C15 134.2(4) . . . . ?
 N1 C8 C14 C19 -49.5(5) . . . . ?
 O1 C6 C7 C1 -20.7(4) . . . . ?
 O2 C2 C3 C4 70.6(5) . . . . ?
 O2 C10 O4 C11 130.1(4) . . . . ?
 O3 C9 C10 O2 -110.5(4) . . . . ?
 O3 C9 C10 O4 6.1(4) . . . . ?
 O3 C11 O4 C10 -31.2(5) . . . . ?
 O4 C10 O2 C2 -88.5(4) . . . . ?
 O4 C11 O3 C9 34.9(5) . . . . ?
 O5 C4 C5 C6 -166.5(4) . . . . ?
 O6 C20 O5 C4 2.2(8) . . . . ?

_shelx_res_file
;
TITL SD_NH_F_0m in P2(1)
CELL 0.71073 12.8045 5.9964 13.75 90 108.2853 90
ZERR 2 0.0044 0.0022 0.0049 0 0.0216 0
LATT -1
SYMM -X,0.5+Y,-Z

SFAC C H N O
UNIT 42 54 2 12

L.S. 20
PLAN  5
TEMP 23
BOND
fmap 2
acta
MORE -1
CONF
REM <HKL>E:/Unsorted/X-ray/Soumen/SN_NH_F-2/work/SD_NH_F_0m.hkl</HKL>

WGHT    0.089000    0.170600
EXTI    0.026919
FVAR       0.31307
C1    1   -0.927764   -0.300620   -0.216756    11.00000    0.04211    0.04769 =
         0.03831   -0.00251    0.01157    0.00263
C2    1   -1.001453   -0.182234   -0.313160    11.00000    0.04184    0.05085 =
         0.04100   -0.00332    0.01216   -0.00309
AFIX  13
H2    2   -0.953613   -0.092092   -0.340957    11.00000   -1.20000
AFIX   0
C3    1   -1.095452   -0.036296   -0.308660    11.00000    0.04869    0.05825 =
         0.04312    0.00219    0.00924    0.00913
AFIX  23
H3A   2   -1.138279    0.001695   -0.378341    11.00000   -1.20000
H3B   2   -1.064794    0.101424   -0.274512    11.00000   -1.20000
AFIX   0
C4    1   -1.173644   -0.129238   -0.255555    11.00000    0.04192    0.05723 =
         0.05704   -0.00586    0.00850    0.00705
AFIX  13
H4    2   -1.195947   -0.280780   -0.280052    11.00000   -1.20000
AFIX   0
C5    1   -1.131366   -0.126855   -0.139855    11.00000    0.04631    0.06881 =
         0.05493   -0.00490    0.01797   -0.00202
AFIX  23
H5A   2   -1.182077   -0.209979   -0.114026    11.00000   -1.20000
H5B   2   -1.130572    0.025952   -0.116485    11.00000   -1.20000
AFIX   0
C6    1   -1.017552   -0.224342   -0.094673    11.00000    0.05168    0.05900 =
         0.04301    0.00423    0.01508    0.00353
AFIX  13
H6    2   -1.007040   -0.271290   -0.023969    11.00000   -1.20000
AFIX   0
C7    1   -0.991786   -0.417662   -0.154580    11.00000    0.05251    0.04981 =
         0.04889    0.00467    0.01239   -0.00050
AFIX  23
H7A   2   -1.058398   -0.486431   -0.198704    11.00000   -1.20000
H7B   2   -0.947265   -0.529796   -0.109392    11.00000   -1.20000
AFIX   0
C8    1   -0.765149   -0.228708   -0.067004    11.00000    0.04450    0.05598 =
         0.04733   -0.00565    0.00377    0.00564
AFIX  23
H8A   2   -0.721828   -0.316959   -0.099382    11.00000   -1.20000
H8B   2   -0.790609   -0.326565   -0.022977    11.00000   -1.20000
AFIX   0
C9    1   -0.867069   -0.466911   -0.264645    11.00000    0.06145    0.05007 =
         0.04583    0.00000    0.01598    0.01214
AFIX  13
H9    2   -0.845725   -0.603761   -0.224323    11.00000   -1.20000
AFIX   0
C10   1   -0.950565   -0.508702   -0.371851    11.00000    0.05915    0.04717 =
         0.05148   -0.00351    0.02176    0.00109
AFIX  13
H10   2   -0.973070   -0.665484   -0.381419    11.00000   -1.20000
AFIX   0
C11   1   -0.779970   -0.425547   -0.385624    11.00000    0.05911    0.06898 =
         0.06355   -0.02496    0.02903   -0.00591
C12   1   -0.723704   -0.648448   -0.381181    11.00000    0.11330    0.11551 =
         0.09441   -0.02195    0.04589    0.04356
AFIX 137
H12A  2   -0.753790   -0.752918   -0.344241    11.00000   -1.50000
H12B  2   -0.646276   -0.631687   -0.346981    11.00000   -1.50000
H12C  2   -0.735286   -0.702402   -0.449496    11.00000   -1.50000
AFIX   0
C13   1   -0.730650   -0.243310   -0.429871    11.00000    0.11035    0.10198 =
         0.10970   -0.04312    0.06576   -0.04707
AFIX 137
H13A  2   -0.656854   -0.216017   -0.386512    11.00000   -1.50000
H13B  2   -0.773650   -0.110161   -0.434868    11.00000   -1.50000
H13C  2   -0.729555   -0.285914   -0.496845    11.00000   -1.50000
AFIX   0
C14   1   -0.694584   -0.049198   -0.003665    11.00000    0.03804    0.05576 =
         0.04786   -0.00164    0.00757    0.00461
C15   1   -0.656639   -0.066750    0.101533    11.00000    0.06339    0.07896 =
         0.05250   -0.00437    0.01059    0.00115
AFIX  43
H15   2   -0.678036   -0.185717    0.134332    11.00000   -1.20000
AFIX   0
C16   1   -0.585037    0.097933    0.158636    11.00000    0.07916    0.09953 =
         0.05554   -0.01259    0.00346   -0.00804
AFIX  43
H16   2   -0.561066    0.088883    0.229748    11.00000   -1.20000
AFIX   0
C17   1   -0.550671    0.266962    0.113144    11.00000    0.06432    0.07778 =
         0.09837   -0.01745    0.00365   -0.01012
AFIX  43
H17   2   -0.500344    0.369158    0.152508    11.00000   -1.20000
AFIX   0
C18   1   -0.589009    0.290462    0.009253    11.00000    0.04871    0.06764 =
         0.11445    0.01220    0.01414   -0.00235
AFIX  43
H18   2   -0.567428    0.411486   -0.022190    11.00000   -1.20000
AFIX   0
C19   1   -0.660075    0.132851   -0.048580    11.00000    0.04736    0.07406 =
         0.06189    0.01315    0.00682    0.01155
AFIX  43
H19   2   -0.685646    0.148471   -0.119432    11.00000   -1.20000
AFIX   0
C20   1   -1.360470   -0.049935   -0.354098    11.00000    0.04587    0.10048 =
         0.05011    0.00500    0.00792    0.00546
C21   1   -1.448158    0.121898   -0.375516    11.00000    0.04951    0.12197 =
         0.08169    0.00596    0.00711    0.01868
AFIX 137
H21A  2   -1.500168    0.096236   -0.442039    11.00000   -1.50000
H21B  2   -1.416037    0.267107   -0.373729    11.00000   -1.50000
H21C  2   -1.485002    0.113525   -0.324638    11.00000   -1.50000
AFIX   0
N1    3   -0.860600   -0.134121   -0.146292    11.00000    0.03854    0.05416 =
         0.04137   -0.00585    0.00818    0.00786
O1    4   -0.937110   -0.051225   -0.095541    11.00000    0.04706    0.05875 =
         0.05406   -0.00891    0.01662    0.00498
O2    4   -1.041575   -0.365451   -0.382269    11.00000    0.05119    0.05878 =
         0.04503   -0.01292    0.00755   -0.00089
O3    4   -0.777154   -0.359742   -0.284875    11.00000    0.05249    0.08599 =
         0.06272   -0.02715    0.02221   -0.00266
O4    4   -0.893743   -0.442987   -0.440059    11.00000    0.06040    0.07046 =
         0.05252   -0.00923    0.02275   -0.00783
O5    4   -1.269439    0.017593   -0.282847    11.00000    0.03824    0.08055 =
         0.07346   -0.01346    0.00495    0.00829
O6    4   -1.368326   -0.225924   -0.394209    11.00000    0.07299    0.11916 =
         0.08875   -0.02711   -0.01346    0.00139
HKLF 4

REM  SD_NH_F_0m in P2(1)
REM R1 =  0.0574 for    2558 Fo > 4sig(Fo)  and  0.0883 for all    3963 data
REM    257 parameters refined using      1 restraints

END

WGHT      0.0877      0.1738

REM Highest difference peak  0.205,  deepest hole -0.233,  1-sigma level  0.064
Q1    1  -0.4161  0.2195  0.2030  11.00000  0.05    0.20
Q2    1  -1.2766 -0.1487 -0.3434  11.00000  0.05    0.20
Q3    1  -1.3981 -0.2180 -0.3601  11.00000  0.05    0.20
Q4    1  -0.5795 -0.2116 -0.2667  11.00000  0.05    0.19
Q5    1  -1.2633 -0.3774 -0.1402  11.00000  0.05    0.19
;
_shelx_res_checksum               92429
_shelx_hkl_file
;
  -1   0   0  153.47    8.20
   2   0   0    2.24    0.18
  -2   0   0    2.08    0.18
  -3   0   0  130.09    6.99
   3   0   0  128.68    7.00
   3   0   0  132.85    6.98
  -3   0   0  124.59    6.97
   4   0   0    1.12    0.21
  -4   0   0    0.63    0.13
   4   0   0    1.01    0.18
  -4   0   0    0.87    0.15
   4   0   0    0.98    0.15
  -4   0   0    0.87    0.16
  -5   0   0    0.54    0.13
  -5   0   0    0.44    0.14
   5   0   0    0.73    0.18
  -5   0   0    0.57    0.14
   5   0   0    0.35    0.11
   6   0   0   16.77    1.08
  -6   0   0   14.39    1.03
  -6   0   0   16.13    1.02
   6   0   0   15.13    1.02
   6   0   0   14.23    1.02
  -6   0   0   16.48    0.99
   7   0   0    0.77    0.19
  -7   0   0    1.36    0.26
   7   0   0    1.11    0.26
  -7   0   0    1.05    0.23
  -7   0   0    1.29    0.24
   7   0   0    1.21    0.28
  -8   0   0    4.83    0.51
   8   0   0    5.14    0.63
   8   0   0    5.16    0.50
  -8   0   0    4.70    0.47
   9   0   0    6.25    0.64
  10   0   0    8.55    0.83
 -10   0   0    9.06    0.77
 -11   0   0    0.00    0.04
  11   0   0   -0.04    0.13
  11   0   0    0.02    0.08
 -11   0   0    0.12    0.19
  12   0   0    0.38    0.35
 -12   0   0   -0.01    0.05
 -12   0   0   -0.02    0.19
  12   0   0    0.10    0.08
 -13   0   0    0.14    0.22
  13   0   0    0.18    0.28
 -14   0   0    3.69    0.67
  14   0   0    2.85    0.71
  15   0   0    0.07    0.30
 -15   0   0    0.15    0.33
   1  -1   0  203.02   10.66
  -1  -1   0  201.35   10.65
  -1  -1   0  198.47   10.65
   1  -1   0  199.83   10.66
  -1   1   0  204.90   10.66
  -1   1   0  186.12   12.05
   1   1   0  186.42   12.05
   1   1   0  208.55   10.67
   1   1   0  214.52   12.06
  -1   1   0  194.25   12.05
  -1   1   0  200.19   10.67
   1   1   0  199.34   10.66
  -2  -1   0  275.71   14.71
   2  -1   0  284.45   14.70
   2  -1   0  283.55   14.72
   2   1   0  272.39   14.71
  -2   1   0  271.18   16.64
  -2   1   0  274.05   14.73
   2   1   0  258.87   16.63
   2   1   0  275.73   16.64
   2   1   0  260.31   14.71
  -2   1   0  294.19   16.63
  -3  -1   0  123.48    6.61
   3  -1   0  122.54    6.64
  -3  -1   0  120.42    6.63
   3  -1   0  132.88    6.62
   3   1   0  119.43    6.63
   3   1   0  117.07    7.46
   3   1   0  122.30    6.62
  -3   1   0  122.12    7.47
  -3   1   0  130.20    7.46
  -3   1   0  118.36    6.63
   3   1   0  111.84    7.45
  -3   1   0  120.24    6.62
   3   1   0  130.46    7.03
  -4  -1   0   25.88    1.68
   4  -1   0   29.77    1.71
   4  -1   0   26.67    1.67
  -4  -1   0   29.75    1.67
  -4   1   0   27.58    1.86
   4   1   0   29.98    1.68
  -4   1   0   29.25    1.70
  -4   1   0   29.30    1.68
   4   1   0   31.63    1.87
   4   1   0   26.18    1.84
   4   1   0   26.72    1.75
  -4   1   0   31.36    1.86
   4   1   0   32.81    1.72
   5  -1   0   31.95    1.84
   5  -1   0   31.00    1.88
  -5  -1   0   33.06    1.84
  -5  -1   0   31.95    1.87
  -5   1   0   30.64    1.76
  -5   1   0   28.28    2.02
   5   1   0   29.80    1.88
  -5   1   0   31.58    1.87
   5   1   0   32.22    1.85
  -5   1   0   31.81    2.04
   5   1   0   31.08    1.81
   5   1   0   33.52    2.05
  -5   1   0   30.46    1.84
   5   1   0   31.67    2.03
  -6  -1   0   18.58    1.19
   6  -1   0   17.18    1.19
  -6  -1   0   18.34    1.22
   6  -1   0   19.64    1.20
   6  -1   0   18.24    1.23
  -6  -1   0   19.50    1.17
   6   1   0   18.87    1.30
  -6   1   0   19.17    1.23
   6   1   0   18.38    1.30
   6   1   0   20.95    1.23
  -6   1   0   19.21    1.20
   6   1   0   18.59    1.25
   6   1   0   17.46    1.18
  -6   1   0   20.17    1.31
  -6   1   0   19.85    1.16
  -6   1   0   16.24    1.28
   7  -1   0   48.21    2.89
   7  -1   0   54.55    2.94
   7  -1   0   50.67    2.98
  -7  -1   0   49.19    2.82
  -7  -1   0   50.27    2.96
  -7  -1   0   51.76    2.92
   7   1   0   52.26    2.89
  -7   1   0   49.27    3.25
  -7   1   0   57.35    3.27
  -7   1   0   45.34    2.79
   7   1   0   47.74    3.25
   7   1   0   49.22    2.92
  -7   1   0   46.74    2.91
  -7   1   0   53.53    2.98
  -8  -1   0   20.08    1.37
   8  -1   0   21.58    1.40
   8  -1   0   18.82    1.32
  -8  -1   0   20.25    1.30
  -8   1   0   21.54    1.30
   8   1   0   19.29    1.40
  -8   1   0   21.37    1.35
   8   1   0   17.19    1.32
   9  -1   0    5.57    0.56
  -9  -1   0    3.93    0.55
  -9  -1   0    5.37    0.64
   9  -1   0    4.43    0.65
   9   1   0    5.02    0.65
  -9   1   0    5.21    0.62
 -10  -1   0    0.64    0.25
  10  -1   0    1.22    0.35
  10   1   0    0.62    0.25
 -10   1   0    1.50    0.34
  11  -1   0    3.52    0.66
 -11  -1   0    3.02    0.53
  11   1   0    3.78    0.63
 -11   1   0    4.18    0.60
 -12  -1   0   11.09    1.01
  12  -1   0   11.79    1.14
 -12   1   0   12.47    1.01
  12   1   0   12.44    1.13
 -13  -1   0    1.22    0.42
  13  -1   0    1.38    0.46
  13   1   0    1.32    0.49
 -13   1   0    1.40    0.43
 -14  -1   0    0.69    0.37
  14  -1   0    0.57    0.38
 -14   1   0    0.64    0.31
 -14   1   0    0.82    0.37
  14   1   0    0.41    0.34
  14   1   0    0.43    0.38
  15  -1   0    0.14    0.35
 -15  -1   0   -0.36    0.23
 -15   1   0   -0.03    0.30
  15   1   0   -0.07    0.39
  15   1   0   -0.12    0.38
 -15   1   0    0.11    0.21
   1   2   0   53.88    2.97
  -1   2   0   56.69    2.98
  -1   2   0   54.19    2.97
   1   2   0   56.08    2.97
   2  -2   0    9.33    0.53
  -2  -2   0    8.74    0.51
  -2   2   0    8.32    0.57
   2   2   0    8.78    0.55
   2   2   0    8.31    0.58
   2   2   0    9.27    0.59
  -2   2   0    9.25    0.58
  -2   2   0    8.97    0.54
   2   2   0    8.99    0.54
   2   2   0    8.66    0.55
  -3  -2   0    0.47    0.09
   3  -2   0    0.43    0.09
   3   2   0    0.55    0.10
  -3   2   0    0.73    0.12
  -3   2   0    0.48    0.10
   3   2   0    0.36    0.09
  -3   2   0    0.78    0.13
   3   2   0    0.48    0.11
   3   2   0    0.55    0.10
   3   2   0    0.61    0.12
  -3   2   0    0.80    0.13
  -4  -2   0   58.93    3.49
   4  -2   0   66.40    3.50
   4   2   0   67.19    3.52
  -4   2   0   59.66    3.13
  -4   2   0   64.58    3.92
   4   2   0   60.53    3.70
  -4   2   0   65.69    3.52
  -4   2   0   65.54    3.94
   4   2   0   65.29    3.19
   4   2   0   61.02    3.92
   4   2   0   60.86    3.53
  -4   2   0   63.47    3.53
  -5  -2   0   82.94    4.82
   5  -2   0   91.71    4.83
   5   2   0   92.07    4.69
   5   2   0   84.93    5.11
   5   2   0   79.88    5.41
   5   2   0   89.96    4.84
  -5   2   0   91.33    4.88
   5   2   0   85.88    4.39
   5   2   0   90.76    4.89
  -5   2   0   83.08    5.41
  -5   2   0   80.94    4.32
   5   2   0   98.63    5.46
  -5   2   0   81.72    4.83
  -5   2   0   89.52    5.44
  -5   2   0   91.53    4.63
   6  -2   0   19.48    1.17
  -6  -2   0   16.95    1.15
  -6   2   0   16.20    1.25
  -6   2   0   17.96    1.19
  -6   2   0   16.18    1.09
   6   2   0   17.51    1.10
   6   2   0   18.98    1.21
   6   2   0   18.04    1.28
   6   2   0   18.09    1.16
  -6   2   0   18.49    1.03
  -6   2   0   17.13    1.15
  -6   2   0   19.59    1.28
   6   2   0   17.14    1.22
   6   2   0   19.61    1.18
   6   2   0   19.26    1.27
  -8  -2   0    3.69    0.47
   8  -2   0    3.40    0.44
   8   2   0    4.74    0.61
  -8   2   0    4.29    0.51
 -10  -2   0   -0.01    0.05
  10  -2   0   -0.01    0.05
 -10   2   0    0.00    0.04
  10   2   0   -0.10    0.12
 -10   2   0    0.21    0.15
  10   2   0    0.08    0.07
 -11  -2   0    0.17    0.21
  11  -2   0    0.59    0.30
  11   2   0   -0.06    0.08
 -11   2   0    0.03    0.04
  12  -2   0    1.00    0.38
 -12  -2   0    0.82    0.32
 -12   2   0    0.02    0.06
  12   2   0    0.27    0.20
  13  -2   0    1.33    0.46
 -13  -2   0    1.13    0.38
 -13   2   0    1.53    0.35
 -14  -2   0    0.24    0.27
  14  -2   0    0.05    0.31
 -14   2   0    0.07    0.18
  14   2   0   -0.22    0.29
 -15  -2   0   -0.06    0.25
  15  -2   0   -0.36    0.28
  15   2   0    0.02    0.39
 -15   2   0    0.33    0.28
  -2   3   0    9.10    0.62
  -2   3   0    8.50    0.60
   2   3   0    9.84    0.59
  -2   3   0   10.00    0.60
   2   3   0   11.09    0.63
   2   3   0    9.83    0.58
   2   3   0    9.21    0.61
  -4  -3   0   11.49    0.69
   4  -3   0   11.14    0.71
   4   3   0   12.39    0.82
   4   3   0   10.97    0.79
  -4   3   0   10.20    0.64
   4   3   0   11.16    0.73
  -4   3   0   12.01    0.76
  -4   3   0   11.19    0.79
   4   3   0   11.63    0.69
  -4   3   0   10.35    0.78
   4   3   0   10.96    0.75
  -5  -3   0    2.12    0.23
   5  -3   0    2.55    0.26
   5   3   0    2.15    0.24
   5   3   0    2.80    0.34
  -5   3   0    2.52    0.32
   5   3   0    2.27    0.29
  -5   3   0    2.18    0.25
  -5   3   0    2.34    0.27
  -5   3   0    2.28    0.27
   5   3   0    2.26    0.26
   5   3   0    2.56    0.28
  -6  -3   0    1.33    0.21
   6  -3   0    1.51    0.24
  -6   3   0    1.09    0.20
   6   3   0    1.50    0.25
   6   3   0    1.68    0.26
   6   3   0    1.62    0.30
   6   3   0    1.31    0.26
  -6   3   0    1.50    0.26
  -6   3   0    1.04    0.21
  -7  -3   0    2.20    0.31
   7  -3   0    1.97    0.31
  -7   3   0    2.51    0.36
  -7   3   0    2.91    0.35
   7   3   0    2.37    0.37
   7   3   0    2.14    0.37
  -7   3   0    2.45    0.37
   7   3   0    2.55    0.39
   8  -3   0    1.04    0.24
  -8  -3   0    0.86    0.22
  -8   3   0    0.54    0.21
  -8   3   0    1.55    0.27
   8   3   0    0.63    0.25
  -9  -3   0    7.13    0.67
   9  -3   0    8.23    0.70
   9   3   0    8.01    0.73
  -9   3   0    7.36    0.60
  10  -3   0    1.75    0.41
 -10  -3   0    1.04    0.31
 -11  -3   0    1.15    0.34
  11  -3   0    1.19    0.39
  11   3   0    1.06    0.41
 -11   3   0    0.97    0.27
 -12  -3   0    0.03    0.21
  12  -3   0    0.95    0.40
 -12   3   0    0.37    0.20
  12   3   0    0.57    0.33
 -13  -3   0    0.02    0.22
  13  -3   0    0.44    0.33
 -13   3   0    0.33    0.19
  14  -3   0    1.14    0.46
 -14  -3   0    0.83    0.36
  14   3   0    0.52    0.39
 -14   3   0    0.50    0.25
   2   4   0    0.54    0.08
   2   4   0    0.38    0.07
   2   4   0    0.49    0.08
  -2   4   0    0.47    0.09
  -2   4   0    0.26    0.04
  -2   4   0    0.41    0.07
   3   4   0    8.60    0.50
   3   4   0    8.65    0.60
  -3   4   0    7.76    0.56
   3   4   0    8.22    0.55
  -3   4   0    8.56    0.49
   3   4   0    7.21    0.56
  -3   4   0    8.74    0.59
   4   4   0    4.75    0.40
  -4   4   0    4.63    0.32
   4   4   0    4.27    0.35
  -4   4   0    4.58    0.38
   4   4   0    4.37    0.36
  -4   4   0    4.08    0.36
   4   4   0    3.91    0.37
   6   4   0    8.51    0.71
   6   4   0    9.70    0.75
   6   4   0    8.33    0.68
  -6   4   0    8.92    0.73
   6   4   0    8.83    0.66
  -6   4   0    8.75    0.71
  -6   4   0    9.09    0.60
   9  -4   0    2.93    0.52
  -9  -4   0    3.77    0.55
   9   4   0    5.05    0.68
  -9   4   0    3.91    0.48
  10  -4   0    0.85    0.31
 -10  -4   0    1.61    0.39
  10   4   0    0.63    0.29
 -10   4   0    1.17    0.26
 -11  -4   0    1.75    0.43
  11  -4   0    0.92    0.40
  11   4   0    0.91    0.39
 -11   4   0    0.82    0.26
  12  -4   0    0.20    0.24
 -12  -4   0    0.43    0.30
  12   4   0    0.48    0.35
 -12   4   0    0.48    0.22
 -13  -4   0    0.04    0.25
  13  -4   0   -0.14    0.23
 -13   4   0   -0.23    0.14
   2   5   0    1.49    0.13
   2   5   0    1.96    0.16
  -2   5   0    1.50    0.13
   3   5   0    7.46    0.53
  -3   5   0    7.27    0.53
   3   5   0    7.98    0.49
  -3   5   0    7.93    0.46
   4   5   0    9.68    0.69
  -4   5   0    9.91    0.71
  -4   5   0   10.11    0.60
   4   5   0    9.64    0.64
   4   5   0    9.94    0.72
   5   5   0    0.62    0.17
   5   5   0    1.22    0.21
  -5   5   0    1.04    0.19
  -5   5   0    1.71    0.24
   5   5   0    1.56    0.28
  -6  -5   0   -0.02    0.04
   6  -5   0   -0.02    0.05
  -6   5   0   -0.02    0.03
  -6   5   0    0.10    0.11
   6   5   0    0.08    0.07
  -6   5   0    0.06    0.08
   6   5   0    0.00    0.14
   6   5   0    0.01    0.03
   6   5   0    0.16    0.14
  -7  -5   0   -0.03    0.05
   7  -5   0   -0.01    0.05
   7   5   0    0.00    0.04
  -7   5   0    0.45    0.16
  -7   5   0    0.26    0.13
   7   5   0    0.14    0.10
   7   5   0    0.49    0.22
  -8  -5   0    2.39    0.41
   8  -5   0    1.35    0.36
  -8   5   0    1.93    0.32
   8   5   0    1.13    0.33
  -9  -5   0    0.27    0.22
   9  -5   0    0.06    0.17
   9   5   0    0.03    0.20
  -9   5   0   -0.03    0.11
  10  -5   0   -0.05    0.23
 -10  -5   0    0.20    0.22
  10   5   0    0.04    0.27
 -10   5   0    0.00    0.13
 -11  -5   0    0.23    0.23
  11  -5   0    0.22    0.28
  11   5   0    0.25    0.28
 -11   5   0    0.16    0.19
 -12  -5   0    0.38    0.29
  12  -5   0    0.13    0.28
 -12   5   0    0.00    0.14
   2   6   0    1.03    0.11
   2   6   0    1.06    0.13
  -2   6   0    0.75    0.09
   4   6   0    1.12    0.20
  -4   6   0    1.79    0.20
   4   6   0    1.91    0.21
   5   6   0    1.28    0.21
  -5   6   0    1.21    0.20
   5   6   0    1.23    0.27
  -5   6   0    0.99    0.19
   6   6   0    0.04    0.15
   6   6   0    0.01    0.04
   6   6   0    0.06    0.08
  -6   6   0    0.22    0.15
  -6   6   0    0.11    0.10
  -6   6   0    0.00    0.03
  -6   6   0    0.31    0.14
  -7   6   0    1.72    0.29
  -7   6   0    0.78    0.21
   7   6   0    1.27    0.37
   8   6   0    0.31    0.25
  -8   6   0    0.50    0.19
   9   6   0    0.34    0.30
  -9   6   0    0.64    0.22
 -10   6   0    0.16    0.17
  10   6   0   -0.10    0.28
  -2   7   0    0.04    0.04
  -2   7   0   -0.01    0.02
   2   7   0   -0.04    0.02
   2   7   0    0.04    0.04
   3   7   0    0.90    0.14
  -4   7   0    0.21    0.09
  -4   7   0    0.02    0.11
   4   7   0    0.14    0.08
   5   7   0    0.09    0.08
   5   7   0   -0.01    0.04
  -5   7   0    0.00    0.03
  -5   7   0    0.13    0.08
  -5   7   0    0.18    0.14
  -6   7   0    0.02    0.04
   6   7   0    0.02    0.04
   6   7   0    0.09    0.10
  -6   7   0    0.09    0.10
   7   7   0    0.00    0.05
  -7   7   0    0.03    0.04
  -7   7   0   -0.09    0.14
   7   7   0    0.21    0.30
  16   0  -1    0.17    0.34
 -16   0   1   -0.23    0.26
  15   0  -1   -0.07    0.30
 -15   0   1   -0.14    0.24
 -14   0   1    0.93    0.35
  14   0  -1    0.46    0.39
 -13   0   1    6.79    0.86
  13   0  -1    6.39    0.97
  11   0  -1    7.04    0.92
  10   0  -1    6.08    0.81
   9   0  -1    5.35    0.70
  -9   0   1    4.46    0.55
  -8   0   1    0.04    0.09
   8   0  -1    0.49    0.21
   8   0  -1    0.57    0.21
  -8   0   1    0.25    0.16
   8   0  -1    0.03    0.04
   8   0  -1    0.19    0.12
  -8   0   1    0.18    0.14
   7   0  -1   31.98    2.00
   7   0  -1   36.77    2.04
  -7   0   1   32.66    1.93
  -7   0   1   35.21    2.05
   7   0  -1   30.64    2.04
  -7   0   1   33.16    2.00
  -6   0   1    4.65    0.44
   6   0  -1    4.69    0.45
   6   0  -1    6.09    0.49
  -6   0   1    4.32    0.40
   6   0  -1    4.42    0.41
  -6   0   1    4.97    0.41
   5   0  -1    2.52    0.34
   5   0  -1    3.46    0.32
  -5   0   1    2.32    0.30
  -5   0   1    2.29    0.29
   5   0  -1    2.85    0.28
  -5   0   1    2.78    0.27
   4   0  -1   68.61    3.64
  -4   0   1   60.82    3.62
  -4   0   1   65.30    3.45
   4   0  -1   59.87    3.48
   4   0  -1   62.74    3.59
  -4   0   1   73.13    3.61
  -3   0   1  119.53    6.66
   3   0  -1  122.20    6.66
  -3   0   1  121.97    6.69
   3   0  -1  129.88    6.70
   2   0  -1  121.04    6.58
  -2   0   1  123.80    6.60
   1   0   1    4.40    0.30
  -1   0  -1    4.76    0.30
   2   0   1  358.17   17.58
   2   0   1  310.24   17.58
  -2   0  -1  307.47   17.56
  -2   0  -1  338.63   17.58
  -3   0  -1   40.62    2.41
   3   0   1   47.34    2.43
   3   0   1   44.32    2.34
   3   0   1   41.44    2.43
  -3   0  -1   46.36    2.33
  -3   0  -1   39.97    2.43
   4   0   1    1.64    0.23
  -4   0  -1    1.83    0.24
   4   0   1    1.35    0.20
  -4   0  -1    1.46    0.20
   4   0   1    1.61    0.24
  -4   0  -1    1.73    0.23
   5   0   1   15.57    0.92
   5   0   1   12.77    0.92
   5   0   1   13.43    0.90
  -5   0  -1   13.22    0.90
  -5   0  -1   13.40    0.87
  -5   0  -1   13.75    0.92
  -6   0  -1   29.47    1.74
   6   0   1   29.77    1.84
   6   0   1   27.21    1.76
  -6   0  -1   28.40    1.82
  -6   0  -1   32.46    1.82
   6   0   1   31.42    1.82
  -7   0  -1    1.86    0.31
  -7   0  -1    1.52    0.27
   7   0   1    2.36    0.38
   7   0   1    1.32    0.26
   7   0   1    1.82    0.33
  -8   0  -1   28.88    1.69
  -8   0  -1   28.15    1.85
   8   0   1   24.42    1.72
   9   0   1    0.11    0.15
   9   0   1    0.09    0.06
  -9   0  -1   -0.01    0.12
  -9   0  -1   -0.02    0.04
 -10   0  -1    5.43    0.70
  10   0   1    6.14    0.80
  11   0   1    5.21    0.76
  12   0   1    4.95    0.83
 -12   0  -1    3.71    0.61
  13   0   1   -0.06    0.24
 -13   0  -1   -0.25    0.21
 -14   0  -1    0.13    0.28
  14   0   1    0.26    0.31
  15   0   1    1.65    0.55
 -15   0  -1    2.88    0.63
  16  -1  -1   -0.07    0.34
 -16  -1   1    0.24    0.39
  16   1  -1    0.14    0.38
  15  -1  -1    0.16    0.33
 -15  -1   1   -0.18    0.18
  15   1  -1    0.25    0.38
 -15   1   1   -0.08    0.31
  15   1  -1   -0.28    0.34
 -15   1   1    0.27    0.25
 -14  -1   1    1.18    0.40
  14  -1  -1    0.93    0.45
 -14   1   1    2.00    0.42
  14   1  -1    1.62    0.55
  14   1  -1    2.58    0.60
 -14   1   1    1.60    0.47
  13  -1  -1    1.01    0.38
 -13  -1   1    1.56    0.43
 -13   1   1    1.08    0.39
  13   1  -1    0.59    0.35
 -12  -1   1    1.89    0.46
  12  -1  -1    1.61    0.46
 -12   1   1    1.54    0.36
  12   1  -1    0.05    0.09
  12   1  -1    0.48    0.24
  11  -1  -1    5.84    0.83
 -11  -1   1    6.74    0.81
 -11   1   1    6.07    0.74
  11   1  -1    4.81    0.76
 -10  -1   1    3.75    0.55
  10  -1  -1    3.37    0.58
 -10   1   1    3.41    0.50
  10   1  -1    2.79    0.53
  -9  -1   1   16.69    1.13
   9  -1  -1   16.36    1.14
   9  -1  -1   13.97    1.16
  -9  -1   1   16.07    1.17
  -9   1   1   15.25    1.08
   9   1  -1   15.87    1.18
  -8  -1   1   10.41    0.76
   8  -1  -1    9.08    0.74
  -8  -1   1    9.63    0.77
   8  -1  -1    8.61    0.77
  -8   1   1   10.51    0.77
   8   1  -1   10.25    0.81
  -8   1   1    8.83    0.71
   8   1  -1    8.75    0.80
   7  -1  -1    2.44    0.37
  -7  -1   1    2.11    0.33
   7  -1  -1    2.27    0.33
  -7  -1   1    2.26    0.31
  -7  -1   1    3.17    0.39
   7  -1  -1    2.52    0.42
   7   1  -1    2.89    0.38
  -7   1   1    2.32    0.33
  -7   1   1    2.57    0.36
   7   1  -1    3.46    0.47
  -7   1   1    2.19    0.32
  -7   1   1    2.83    0.36
  -7   1   1    3.00    0.37
   7   1  -1    2.90    0.42
   7   1  -1    3.02    0.40
   7   1  -1    3.21    0.41
   7   1  -1    2.99    0.38
   6  -1  -1   23.09    1.39
  -6  -1   1   20.79    1.34
  -6  -1   1   21.21    1.29
   6  -1  -1   22.59    1.33
  -6  -1   1   20.82    1.30
   6   1  -1   20.84    1.46
  -6   1   1   21.19    1.28
   6   1  -1   21.58    1.34
  -6   1   1   23.23    1.38
   6   1  -1   21.29    1.38
  -6   1   1   22.02    1.33
  -6   1   1   20.04    1.45
  -6   1   1   19.80    1.44
   6   1  -1   20.11    1.37
   6   1  -1   21.69    1.34
  -5  -1   1   47.08    2.67
   5  -1  -1   45.91    2.69
   5  -1  -1   44.17    2.64
  -5  -1   1   46.80    2.64
   5   1  -1   46.26    2.97
   5   1  -1   46.61    2.61
   5   1  -1   48.09    2.97
   5   1  -1   47.19    2.70
   5   1  -1   48.85    2.66
  -5   1   1   45.12    2.65
  -5   1   1   48.13    2.55
  -5   1   1   48.35    2.71
  -5   1   1   45.74    2.96
   5   1  -1   47.26    2.79
  -5   1   1   46.36    2.97
  -4  -1   1   67.71    4.04
  -4  -1   1   78.20    4.08
   4  -1  -1   73.50    4.09
   4  -1  -1   81.96    4.07
   4   1  -1   66.79    4.55
   4   1  -1   82.40    4.11
   4   1  -1   73.55    4.06
   4   1  -1   73.49    4.29
  -4   1   1   74.84    4.10
   4   1  -1   74.47    4.57
  -4   1   1   67.95    4.55
  -4   1   1   71.86    4.05
  -3  -1   1   25.59    1.39
   3  -1  -1   23.50    1.37
   3  -1  -1   24.15    1.39
   3   1  -1   23.86    1.37
  -3   1   1   22.81    1.51
   3   1  -1   22.86    1.53
   3   1  -1   26.57    1.41
  -3   1   1   25.06    1.53
  -3   1   1   23.46    1.39
   3   1  -1   23.01    1.52
  -3   1   1   21.82    1.36
   2  -1  -1   78.50    4.13
   2  -1  -1   73.42    4.10
  -2  -1   1   79.16    4.10
  -2  -1   1   73.27    4.11
  -2   1   1   74.21    4.12
   2   1  -1   71.01    4.12
  -2   1   1   73.13    4.10
  -2   1   1   73.00    4.62
   2   1  -1   78.05    4.63
   2   1  -1   77.99    4.10
  -2   1   1   81.59    4.63
   2   1  -1   75.50    4.62
  -1  -1   1  358.44   20.19
   1  -1  -1  375.81   20.20
  -1   1   1  371.23   20.20
   1   1  -1  355.92   20.20
   1   1  -1  402.04   22.91
   1   1  -1  438.43   22.91
   1   1  -1  378.78   20.19
  -1   1   1  386.17   22.89
  -1   1   1  342.50   20.18
   0  -1  -1  988.58   47.76
   0  -1   1 1000.00   47.78
   0  -1  -1  974.86   47.74
   0   1   1  777.82   47.72
   0   1   1  827.12   47.72
   0   1  -1  844.84   47.75
   0   1  -1  851.37   47.73
  -1  -1  -1  542.03   28.58
   1  -1   1  543.59   28.53
   1  -1   1  540.40   28.55
   1   1   1  592.14   32.37
   1   1   1  500.30   28.52
   1   1   1  572.35   32.35
  -1   1  -1  485.48   28.52
  -1   1  -1  522.98   28.53
   1   1   1  526.87   28.52
  -1   1  -1  525.43   32.28
   2  -1   1    0.73    0.11
  -2  -1  -1    0.65    0.10
   2  -1   1    0.78    0.12
  -2  -1  -1    0.71    0.10
   2   1   1    0.80    0.12
  -2   1  -1    0.84    0.11
   2   1   1    0.85    0.12
  -2   1  -1    0.56    0.10
  -2   1  -1    0.56    0.10
   2   1   1    0.69    0.11
   2   1   1    0.81    0.12
   3  -1   1   38.75    2.21
  -3  -1  -1   39.53    2.20
  -3  -1  -1   37.35    2.20
   3  -1   1   38.70    2.20
  -3   1  -1   41.87    2.47
   3   1   1   40.16    2.22
  -3   1  -1   37.54    2.20
   3   1   1   39.28    2.46
  -3   1  -1   40.42    2.22
   3   1   1   36.70    2.45
   3   1   1   39.70    2.20
  -3   1  -1   39.37    2.45
  -4  -1  -1  127.15    6.50
   4  -1   1  125.98    6.49
  -4  -1  -1  114.99    6.47
   4  -1   1  111.86    6.50
  -4   1  -1  109.78    6.50
   4   1   1  117.15    7.30
  -4   1  -1  109.74    7.29
   4   1   1  124.51    6.25
   4   1   1  110.53    7.29
   4   1   1  119.58    6.49
  -4   1  -1  137.37    6.50
   4   1   1  118.38    6.51
  -4   1  -1  126.10    7.29
  -4   1  -1  112.79    6.20
  -5  -1  -1   64.72    3.72
  -5  -1  -1   63.27    3.73
   5  -1   1   65.56    3.77
   5  -1   1   65.45    3.73
  -5   1  -1   67.47    3.74
   5   1   1   73.30    3.78
   5   1   1   68.63    3.62
   5   1   1   60.30    4.15
  -5   1  -1   72.30    4.19
  -5   1  -1   68.73    3.58
  -5   1  -1   62.85    4.16
   5   1   1   71.97    4.18
   5   1   1   62.89    3.73
  -5   1  -1   65.68    3.76
   6  -1   1   16.84    1.06
  -6  -1  -1   14.02    1.00
   6  -1   1   14.37    1.03
  -6  -1  -1   14.76    1.02
  -6  -1  -1   18.14    1.08
   6   1   1   14.99    1.07
   6   1   1   15.92    1.13
  -6   1  -1   17.63    1.07
  -6   1  -1   16.44    1.09
  -6   1  -1   14.88    0.99
   6   1   1   15.86    1.12
   6   1   1   16.38    1.06
  -6   1  -1   15.45    1.12
   6   1   1   14.35    1.03
  -7  -1  -1    3.61    0.39
  -7  -1  -1    3.28    0.43
   7  -1   1    4.03    0.41
   7  -1   1    4.42    0.53
   7  -1   1    3.97    0.53
  -7  -1  -1    3.16    0.44
   7   1   1    3.98    0.50
  -7   1  -1    3.71    0.45
   7   1   1    3.76    0.49
  -7   1  -1    3.15    0.44
  -7   1  -1    4.35    0.46
   7   1   1    2.91    0.39
  -7   1  -1    3.72    0.45
   8  -1   1   14.59    1.06
  -8  -1  -1   14.45    1.06
   8  -1   1   16.35    1.12
  -8  -1  -1   14.57    1.03
   8   1   1   16.46    1.12
  -8   1  -1   12.61    0.98
   9  -1   1    2.62    0.48
  -9  -1  -1    1.85    0.37
   9   1   1    1.64    0.38
  -9   1  -1    2.07    0.37
 -10  -1  -1    3.19    0.50
  10  -1   1    2.45    0.51
  10   1   1    2.37    0.49
 -10   1  -1    4.03    0.55
 -11  -1  -1   12.50    1.05
  11  -1   1   12.26    1.12
 -11   1  -1   12.92    1.02
  11   1   1   13.59    1.13
 -12  -1  -1    1.69    0.42
  12  -1   1    1.27    0.43
 -12   1  -1    2.01    0.45
  12   1   1    1.35    0.46
 -13  -1  -1    4.21    0.69
  13  -1   1    3.43    0.70
  13   1   1    2.86    0.64
 -13   1  -1    3.15    0.60
  14  -1   1    0.63    0.39
 -14  -1  -1    0.18    0.30
 -14   1  -1    0.53    0.36
  14   1   1    0.39    0.38
  14   1   1   -0.01    0.30
 -14   1  -1    0.35    0.21
 -15  -1  -1    0.01    0.29
  15  -1   1   -0.01    0.26
 -15   1  -1    0.20    0.30
 -15   1  -1    0.24    0.27
  15   1   1    0.33    0.43
  15   1   1    0.30    0.36
  15  -2  -1    0.61    0.38
 -15  -2   1    1.15    0.42
  15   2  -1    0.03    0.36
 -15   2   1    1.25    0.35
  14  -2  -1    0.29    0.29
 -14  -2   1    1.00    0.37
  14   2  -1   -0.02    0.30
 -14   2   1    1.08    0.34
 -13  -2   1    1.17    0.39
  13  -2  -1    0.96    0.42
 -13   2   1    1.53    0.35
  13   2  -1    0.40    0.34
  12  -2  -1    2.60    0.60
 -12  -2   1    3.32    0.59
 -11  -2   1    2.89    0.53
  11  -2  -1    2.97    0.58
  11   2  -1    3.17    0.59
  10  -2  -1    3.32    0.48
 -10  -2   1    4.06    0.57
  10   2  -1    3.98    0.64
 -10   2   1    3.62    0.51
   7  -2  -1   11.04    0.84
  -7  -2   1   12.65    0.89
   7   2  -1   12.76    0.90
  -7   2   1   12.99    0.96
  -7   2   1   12.19    0.93
   7   2  -1   12.18    0.93
  -7   2   1   12.01    0.83
   7   2  -1   11.63    0.93
   7   2  -1   11.45    0.89
  -7   2   1   12.24    0.94
  -6  -2   1    0.16    0.09
  -6  -2   1    0.00    0.02
   6  -2  -1   -0.01    0.03
  -6  -2   1    0.01    0.02
   6  -2  -1    0.00    0.03
   6  -2  -1    0.04    0.07
  -6   2   1    0.00    0.03
  -6   2   1    0.09    0.10
  -6   2   1    0.16    0.10
   6   2  -1   -0.13    0.07
  -6   2   1   -0.08    0.07
   6   2  -1    0.00    0.12
   6   2  -1   -0.05    0.05
   6   2  -1   -0.07    0.07
   6   2  -1   -0.05    0.07
   6   2  -1    0.10    0.09
  -6   2   1   -0.02    0.07
  -6   2   1   -0.06    0.07
  -6   2   1    0.12    0.10
   6   2  -1    0.09    0.12
   5  -2  -1   40.69    2.58
  -5  -2   1   46.24    2.62
   5   2  -1   48.15    2.75
   5   2  -1   48.88    2.41
   5   2  -1   43.19    2.64
  -5   2   1   44.21    2.60
   5   2  -1   46.19    2.92
  -5   2   1   42.09    2.31
  -5   2   1   47.06    2.90
   5   2  -1   50.09    2.61
   5   2  -1   46.64    2.90
  -5   2   1   46.16    2.66
  -5   2   1   45.84    2.91
   4  -2  -1   15.35    0.88
  -4  -2   1   13.57    0.88
  -4   2   1   13.32    0.95
   4   2  -1   14.70    0.83
   4   2  -1   13.67    0.91
   4   2  -1   15.80    0.99
   4   2  -1   13.62    0.88
  -4   2   1   14.07    0.91
   4   2  -1   13.23    0.91
  -4   2   1   15.20    0.89
  -4   2   1   13.87    0.78
  -4   2   1   14.48    0.97
   4   2  -1   13.45    0.95
  -3  -2   1   69.91    3.72
   3  -2  -1   61.99    3.70
   3   2  -1   61.99    4.17
  -3   2   1   70.69    3.73
  -3   2   1   71.24    3.76
   3   2  -1   71.88    3.76
  -3   2   1   72.13    4.19
   3   2  -1   69.06    3.95
   3   2  -1   66.96    3.72
   3   2  -1   73.18    4.20
  -3   2   1   61.66    4.17
   2  -2  -1   62.45    3.50
  -2  -2   1   66.21    3.51
  -2   2   1   69.41    3.97
  -2   2   1   63.05    3.53
   2   2  -1   65.97    3.55
  -2   2   1   67.49    3.55
  -2   2   1   58.30    3.95
   2   2  -1   71.07    3.98
   2   2  -1   67.43    3.53
   2   2  -1   60.12    3.96
  -1   2   1   84.88    4.79
  -1   2   1   89.28    4.81
   1   2  -1   94.40    4.79
   1   2  -1   88.65    4.80
   0   2  -1   79.39    4.11
   0   2  -1   76.53    4.12
   0   2   1   75.93    4.11
   0   2   1   74.33    4.10
   1   2   1   30.67    2.21
   1   2   1   37.95    1.99
   1   2   1   36.49    2.09
  -1   2  -1   32.19    2.21
   1   2   1   34.95    1.99
  -1   2  -1   36.08    2.00
  -1   2  -1   41.35    2.23
  -1   2  -1   38.86    2.01
   1   2   1   39.52    2.22
   2  -2   1    0.33    0.07
  -2  -2  -1    0.46    0.08
  -2   2  -1    0.40    0.08
  -2   2  -1    0.39    0.08
   2   2   1    0.34    0.07
  -2   2  -1    0.33    0.07
  -2   2  -1    0.32    0.08
   2   2   1    0.43    0.08
   2   2   1    0.39    0.08
   2   2   1    0.44    0.09
   2   2   1    0.31    0.07
   3  -2   1  126.19    6.54
  -3  -2  -1  110.86    6.50
   3   2   1  123.11    6.92
   3   2   1  125.35    7.36
   3   2   1  114.69    6.54
  -3   2  -1  127.14    5.88
  -3   2  -1  120.13    6.55
   3   2   1  120.64    5.87
  -3   2  -1  118.28    6.53
  -3   2  -1  120.67    7.36
   3   2   1  117.17    7.35
  -3   2  -1  120.69    7.35
  -4  -2  -1    5.69    0.43
   4  -2   1    6.11    0.45
   4   2   1    5.50    0.41
  -4   2  -1    6.26    0.45
  -4   2  -1    5.83    0.46
   4   2   1    5.85    0.47
  -4   2  -1    5.52    0.46
  -4   2  -1    5.57    0.39
   4   2   1    5.57    0.47
   4   2   1    5.59    0.44
  -4   2  -1    5.49    0.46
   4   2   1    5.34    0.45
  -5  -2  -1   11.76    0.80
   5  -2   1   12.43    0.82
   5   2   1   11.96    0.85
   5   2   1   11.67    0.82
  -5   2  -1   11.74    0.85
  -5   2  -1   12.48    0.78
   5   2   1   12.05    0.77
   5   2   1   11.48    0.81
  -5   2  -1   13.27    0.74
  -5   2  -1   11.21    0.87
   5   2   1   11.67    0.88
  -5   2  -1   12.40    0.87
   5   2   1   12.68    0.89
  -5   2  -1   11.85    0.82
   6  -2   1   30.55    1.87
  -6  -2  -1   29.18    1.86
  -6   2  -1   31.07    1.94
  -6   2  -1   29.56    1.67
   6   2   1   27.60    2.05
  -6   2  -1   29.57    1.78
  -6   2  -1   32.12    2.07
   6   2   1   33.39    2.09
   6   2   1   29.97    1.74
   6   2   1   36.12    1.88
  -6   2  -1   33.39    1.94
  -6   2  -1   33.18    2.08
   6   2   1   30.13    1.88
  -8  -2  -1    4.77    0.50
   8  -2   1    4.59    0.48
   9  -2   1    1.17    0.28
  -9  -2  -1    1.17    0.27
   9   2   1    1.83    0.40
  -9   2  -1    0.53    0.18
 -10  -2  -1    4.10    0.59
  10  -2   1    3.43    0.62
 -10   2  -1    3.20    0.53
  10   2   1    4.08    0.65
 -11  -2  -1    6.11    0.79
  11  -2   1    5.69    0.83
 -12  -2  -1    3.66    0.63
  12  -2   1    4.00    0.73
 -12   2  -1    3.45    0.51
  12   2   1    2.67    0.58
 -13  -2  -1   -0.13    0.25
  13  -2   1    0.04    0.28
 -13   2  -1    0.02    0.20
  13   2   1    0.09    0.29
 -14  -2  -1    0.90    0.40
  14  -2   1    0.41    0.33
 -14   2  -1    0.81    0.31
  15  -2   1    0.38    0.38
 -15  -2  -1    0.48    0.36
 -15   2  -1    0.37    0.27
  15   2   1    0.06    0.35
 -15   3   1   -0.11    0.19
  14  -3  -1   -0.09    0.25
 -14  -3   1   -0.21    0.17
  14   3  -1    0.18    0.37
 -14   3   1    0.22    0.23
 -13  -3   1    0.03    0.19
  13  -3  -1   -0.07    0.23
 -13   3   1    0.15    0.17
  13   3  -1   -0.01    0.29
  12  -3  -1    0.07    0.23
 -12  -3   1    0.11    0.23
  12   3  -1    0.03    0.28
 -12   3   1    0.20    0.19
 -11  -3   1    4.58    0.63
  11  -3  -1    2.50    0.54
 -11   3   1    1.10    0.25
  10  -3  -1    0.06    0.18
 -10  -3   1    0.03    0.15
  10  -3  -1    0.04    0.21
  10   3  -1    0.01    0.07
 -10   3   1    0.02    0.04
   9  -3  -1    5.10    0.52
  -9  -3   1    4.84    0.52
   9   3  -1    4.71    0.65
  -9   3   1    5.07    0.46
  -8  -3   1   12.99    0.97
   8  -3  -1   13.75    0.97
   8   3  -1   13.40    1.08
   8   3  -1   15.30    1.03
  -8   3   1   13.46    0.88
   8   3  -1   13.06    1.01
  -8   3   1   15.06    1.10
   7  -3  -1   16.54    1.08
  -7  -3   1   16.13    1.09
   7   3  -1   16.10    1.09
   7   3  -1   19.16    1.26
  -7   3   1   15.85    1.21
  -7   3   1   17.07    1.21
  -7   3   1   15.49    0.98
   7   3  -1   16.84    1.22
   7   3  -1   15.98    1.14
  -6  -3   1   11.46    0.80
   6  -3  -1   11.77    0.79
   6   3  -1   11.27    0.82
  -6   3   1   12.24    0.87
   6   3  -1   11.47    0.88
   6   3  -1   12.10    0.85
  -6   3   1   12.45    0.90
  -6   3   1   12.70    0.74
  -6   3   1   11.38    0.87
   6   3  -1   12.38    0.91
   6   3  -1   10.97    0.79
  -5  -3   1    5.80    0.44
   5  -3  -1    5.84    0.44
  -5   3   1    6.35    0.52
   5   3  -1    5.35    0.45
   5   3  -1    5.87    0.49
  -5   3   1    6.87    0.53
  -5   3   1    5.83    0.41
  -5   3   1    6.13    0.49
   5   3  -1    6.75    0.48
   5   3  -1    5.58    0.47
   5   3  -1    6.38    0.52
  -4  -3   1   39.26    2.22
   4  -3  -1   38.87    2.22
   4   3  -1   39.91    2.39
   4   3  -1   40.75    2.07
   4   3  -1   42.23    2.27
  -4   3   1   38.40    2.51
   4   3  -1   43.11    2.55
  -4   3   1   38.93    2.02
  -4   3   1   41.76    2.54
   4   3  -1   37.48    2.51
   3   3  -1   45.25    3.01
  -3   3   1   49.38    2.73
  -3   3   1   52.20    3.04
   3   3  -1   53.41    3.05
   3   3  -1   48.70    2.45
   3   3  -1   46.94    2.70
  -3   3   1   50.40    2.42
  -3   3   1   47.16    3.01
   3   3  -1   47.20    2.86
  -2   3   1    0.68    0.11
   2   3  -1    0.73    0.08
   2   3  -1    1.04    0.10
   2   3  -1    0.82    0.11
  -2   3   1    1.07    0.08
   1   3  -1   28.71    1.55
  -1   3   1   27.66    1.57
   0   3  -1   16.27    0.91
   1   3   1   32.62    1.82
  -1   3  -1   33.71    1.83
   2   3   1   35.88    2.11
   2   3   1   39.63    1.88
   2   3   1   41.48    2.37
  -2   3  -1   39.65    1.91
  -2   3  -1   36.92    2.13
   2   3   1   37.16    2.22
  -2   3  -1   40.71    2.36
  -2   3  -1   36.63    2.35
   2   3   1   34.70    2.35
   3  -3   1   27.32    1.52
  -3  -3  -1   25.78    1.49
   3   3   1   27.74    1.55
   3   3   1   26.83    1.62
  -3   3  -1   26.34    1.40
   3   3   1   28.38    1.40
  -3   3  -1   25.70    1.71
   3   3   1   24.79    1.71
   3   3   1   27.59    1.72
  -3   3  -1   28.01    1.72
  -3   3  -1   27.19    1.57
   4  -3   1   29.46    1.76
  -4  -3  -1   32.11    1.74
   4   3   1   30.65    1.61
   4   3   1   30.65    1.78
  -4   3  -1   29.55    1.60
   4   3   1   30.58    1.98
  -4   3  -1   30.93    1.81
   4   3   1   29.85    1.97
  -4   3  -1   30.15    1.96
   4   3   1   29.96    1.86
  -4   3  -1   30.98    1.98
  -5  -3  -1   16.26    1.08
   5  -3   1   18.30    1.13
   5   3   1   16.90    1.12
   5   3   1   16.76    1.23
  -5   3  -1   19.22    1.18
  -5   3  -1   18.56    1.24
   5   3   1   18.06    1.06
   5   3   1   19.02    1.25
  -5   3  -1   17.46    1.22
  -5   3  -1   17.34    1.01
   6  -3   1   33.66    1.77
  -6  -3  -1   26.43    1.69
   6   3   1   27.87    1.62
   6   3   1   27.38    1.90
  -6   3  -1   26.13    1.88
  -6   3  -1   27.32    1.55
   6   3   1   30.47    1.93
  -6   3  -1   28.38    1.91
  -7  -3  -1   18.31    1.18
   7  -3   1   17.19    1.20
  -7   3  -1   18.11    1.07
  -7   3  -1   17.18    1.30
   7   3   1   18.84    1.33
   7   3   1   17.67    1.16
   8  -3   1    7.31    0.70
  -8  -3  -1    8.92    0.71
   8   3   1    9.51    0.75
  -8   3  -1    8.54    0.63
   9  -3   1    0.98    0.25
   9  -3   1    0.26    0.15
  -9  -3  -1    1.11    0.27
  -9  -3  -1    0.36    0.17
   9   3   1    0.17    0.19
 -10  -3  -1    0.60    0.25
  10  -3   1    0.58    0.28
  11  -3   1    1.33    0.43
 -11  -3  -1    2.25    0.49
  11   3   1    1.71    0.50
 -11   3  -1    1.63    0.36
 -12  -3  -1    0.29    0.24
  12  -3   1    0.02    0.26
 -12   3  -1    0.42    0.23
  12   3   1    0.37    0.27
 -13  -3  -1   -0.10    0.21
  13  -3   1   -0.07    0.26
  13   3   1    0.18    0.35
 -13   3  -1    0.13    0.18
  14  -3   1    0.19    0.35
 -14  -3  -1   -0.18    0.23
 -14   3  -1    0.01    0.21
 -13  -4   1    0.32    0.29
  13  -4  -1    0.30    0.31
 -13   4   1    0.61    0.25
  13   4  -1    0.24    0.31
  12  -4  -1    0.03    0.27
 -12  -4   1    0.07    0.21
  12   4  -1    0.44    0.32
 -12   4   1    0.34    0.21
  11  -4  -1    0.57    0.30
 -11  -4   1    0.75    0.27
 -11   4   1    0.53    0.20
  10  -4  -1    1.11    0.36
 -10  -4   1    2.02    0.43
  10   4  -1    0.48    0.27
 -10   4   1    1.01    0.25
  -9  -4   1    1.99    0.39
   9  -4  -1    0.90    0.33
  -9   4   1    1.14    0.26
   9   4  -1    1.35    0.38
  -8   4   1    5.25    0.57
   8   4  -1    5.80    0.69
  -8   4   1    6.11    0.50
   8   4  -1    6.57    0.63
   8   4  -1    6.29    0.58
  -7   4   1    8.81    0.73
   7   4  -1    8.55    0.72
   7   4  -1    9.28    0.75
   7   4  -1    8.70    0.68
   7   4  -1    7.11    0.66
  -7   4   1    8.56    0.60
  -7   4   1    7.50    0.69
   6  -4  -1    4.35    0.37
  -6  -4   1    3.96    0.34
  -6   4   1    4.24    0.42
  -6   4   1    4.33    0.35
   6   4  -1    3.63    0.39
   6   4  -1    4.55    0.43
   6   4  -1    4.86    0.46
  -6   4   1    4.65    0.44
   6   4  -1    4.28    0.50
   4   4  -1    8.28    0.60
   4   4  -1    8.36    0.56
   4   4  -1    7.77    0.61
  -4   4   1    8.22    0.61
  -4   4   1    8.78    0.52
  -4   4   1    8.96    0.64
   4   4  -1    9.49    0.66
  -3   4   1    4.99    0.38
   3   4  -1    5.01    0.37
  -3   4   1    4.72    0.36
   3   4  -1    5.14    0.35
   3   4  -1    4.75    0.37
  -3   4   1    5.39    0.32
   3   4  -1    5.50    0.40
  -2   4   1    1.16    0.11
   2   4  -1    0.70    0.07
   2   4  -1    1.34    0.13
  -1  -4   1    0.03    0.02
   1  -4   1   -0.01    0.02
  -1  -4  -1    0.00    0.02
  -2   4  -1   16.06    0.96
   2   4   1   12.57    0.94
   2   4   1   15.48    0.77
  -2   4  -1   15.74    0.80
   2   4   1   14.28    0.89
  -2   4  -1   13.43    0.93
   2   4   1   15.70    0.96
  -3   4  -1    7.81    0.48
   3   4   1    6.62    0.54
   3   4   1    8.48    0.57
   3   4   1    7.50    0.47
  -3   4  -1    8.36    0.57
  -3   4  -1    7.24    0.54
   3   4   1    7.10    0.52
   4   4   1   10.39    0.64
  -4   4  -1   10.31    0.76
   4   4   1    9.86    0.71
   4   4   1   10.95    0.77
   4   4   1    9.37    0.74
  -4   4  -1   10.92    0.64
  -4   4  -1    9.90    0.74
  -5  -4  -1    2.45    0.22
   5  -4   1    2.75    0.26
   5   4   1    2.77    0.31
  -5   4  -1    2.65    0.30
  -5   4  -1    2.64    0.31
   5   4   1    2.60    0.35
   5   4   1    2.57    0.35
  -5   4  -1    2.54    0.31
  -6   4  -1    0.82    0.20
   6   4   1    0.75    0.22
   6   4   1    0.96    0.22
   6   4   1    0.63    0.19
  -6   4  -1    1.15    0.22
  -6   4  -1    0.70    0.19
  -7   4  -1    1.23    0.27
  -7   4  -1    1.19    0.25
   7   4   1    0.92    0.26
   7   4   1    1.12    0.30
  -8  -4  -1    0.00    0.04
   8  -4   1    0.03    0.05
   8   4   1   -0.11    0.17
  -8   4  -1    0.15    0.14
   9  -4   1    0.72    0.29
  -9  -4  -1    1.46    0.36
   9   4   1    1.32    0.38
  -9   4  -1    1.37    0.30
 -10  -4  -1    1.78    0.42
  10  -4   1    1.09    0.41
 -10   4  -1    1.19    0.29
  10   4   1    1.33    0.40
 -11  -4  -1    1.04    0.35
  11  -4   1    0.86    0.36
 -11   4  -1    0.15    0.17
  11   4   1    0.28    0.29
 -12  -4  -1    0.87    0.37
  12  -4   1    0.73    0.37
  12   4   1    0.94    0.41
 -12   4  -1    0.88    0.30
  13  -4   1    0.29    0.33
 -13  -4  -1    0.21    0.28
 -13   4  -1    0.35    0.24
  13   4   1    0.37    0.36
 -12  -5   1    0.76    0.36
  12  -5  -1    0.64    0.36
  12   5  -1    0.76    0.38
 -12   5   1    0.56    0.22
 -11  -5   1    0.86    0.33
  11  -5  -1    0.19    0.28
 -11   5   1    0.55    0.21
 -10  -5   1    0.88    0.31
  10  -5  -1    0.97    0.37
 -10   5   1    0.80    0.24
  -9  -5   1    2.27    0.43
   9  -5  -1    1.57    0.40
  -9   5   1    2.92    0.39
   9   5  -1    3.07    0.56
   8  -5  -1    2.03    0.41
  -8  -5   1    2.50    0.43
   8   5  -1    1.98    0.42
   8   5  -1    2.95    0.45
  -8   5   1    2.76    0.37
  -7   5   1    0.56    0.16
   7   5  -1    0.42    0.22
   7   5  -1    0.41    0.18
   7   5  -1    0.63    0.18
  -7   5   1    0.40    0.16
  -6  -5   1   -0.03    0.04
   6  -5  -1    0.01    0.05
   6   5  -1    0.30    0.14
  -6   5   1    0.01    0.04
   6   5  -1    0.13    0.17
   6   5  -1    0.14    0.09
  -6   5   1    0.25    0.14
  -6   5   1    0.00    0.03
  -6   5   1    0.12    0.07
  -5   5   1    6.74    0.44
   5   5  -1    6.44    0.52
  -5   5   1    5.62    0.49
   5   5  -1    6.04    0.50
   5   5  -1    6.10    0.51
   4   5  -1    8.38    0.65
  -4   5   1    9.66    0.55
  -4   5   1    8.25    0.63
   4   5  -1   10.46    0.62
   4   5  -1    8.88    0.64
  -3   5   1    1.92    0.16
   3   5  -1    2.01    0.24
   3   5  -1    1.29    0.15
   3   5  -1    1.59    0.17
  -3   5   1    1.27    0.14
  -2   5  -1    5.61    0.34
  -2   5  -1    4.51    0.35
   2   5   1    4.85    0.34
   2   5   1    4.28    0.34
  -3   5  -1    4.88    0.41
   3   5   1    6.07    0.39
  -3   5  -1    5.55    0.38
   3   5   1    4.76    0.41
   3   5   1    5.72    0.41
   4   5   1    3.00    0.30
  -4   5  -1    3.07    0.28
  -4   5  -1    3.07    0.30
   4   5   1    3.19    0.30
   5   5   1    1.34    0.23
  -5   5  -1    1.07    0.21
   5   5   1    1.36    0.26
  -5   5  -1    1.39    0.23
   6   5   1    2.92    0.42
  -6   5  -1    3.36    0.37
   6   5   1    2.53    0.36
  -6   5  -1    2.57    0.36
   7   5   1    0.80    0.27
  -7   5  -1    1.15    0.25
   8  -5   1    1.40    0.40
  -8  -5  -1    2.50    0.45
   8   5   1    1.75    0.38
  -8   5  -1    2.00    0.33
   9  -5   1    0.96    0.36
  -9  -5  -1    2.04    0.42
  -9   5  -1    0.94    0.25
   9   5   1    1.35    0.39
  10  -5   1    2.17    0.51
 -10  -5  -1    1.40    0.41
 -10   5  -1    1.58    0.33
  10   5   1    0.82    0.37
  11  -5   1    1.44    0.47
 -11  -5  -1    1.32    0.42
 -11   5  -1    1.15    0.33
  11   5   1    1.08    0.40
 -10   6   1    0.39    0.19
  10   6  -1    0.41    0.30
  -9   6   1   -0.11    0.13
  -8   6   1    0.26    0.16
   7   6  -1    0.13    0.14
   7   6  -1    0.01    0.21
   7   6  -1   -0.02    0.04
  -7   6   1    0.10    0.10
   7   6  -1    0.22    0.12
  -7   6   1   -0.02    0.04
  -7   6   1    0.22    0.15
  -6   6   1    0.79    0.18
   6   6  -1    0.57    0.26
  -6   6   1    0.26    0.14
   6   6  -1    0.52    0.15
  -6   6   1    0.60    0.16
   6   6  -1    0.29    0.15
   5   6  -1    0.37    0.14
   5   6  -1    0.39    0.12
  -5   6   1    0.13    0.12
  -5   6   1    0.49    0.14
   5   6  -1    0.43    0.21
  -5   6   1    0.28    0.09
  -4   6   1    1.56    0.19
   4   6  -1    1.70    0.24
   4   6  -1    1.80    0.21
   2   6  -1    0.34    0.07
   2   6  -1    0.74    0.12
   1   6   1    0.55    0.06
  -3   6  -1    0.82    0.14
   3   6   1    0.39    0.10
  -4   6  -1    1.32    0.21
  -4   6  -1    1.13    0.19
   4   6   1    1.06    0.19
   5   6   1    0.69    0.16
   5   6   1    0.31    0.17
  -5   6  -1    0.42    0.15
  -5   6  -1    0.33    0.12
   6   6   1    0.05    0.08
  -6   6  -1    0.05    0.08
  -6   6  -1    0.02    0.03
   6   6   1    0.00    0.04
   6   6   1    0.05    0.17
  -6   6  -1    0.02    0.12
   7   6   1    0.02    0.04
  -7   6  -1   -0.05    0.04
  -7   6  -1   -0.03    0.13
   7   6   1   -0.06    0.18
   8   6   1    0.33    0.26
  -8   6  -1    0.04    0.14
  -9   6  -1    0.08    0.16
   9   6   1    0.10    0.27
   7   7  -1    0.12    0.27
  -7   7   1    0.02    0.04
   7   7  -1   -0.02    0.05
  -7   7   1    0.07    0.10
  -7   7   1    0.29    0.18
  -6   7   1    0.09    0.15
  -6   7   1    0.07    0.09
   6   7  -1    0.11    0.09
   6   7  -1    0.01    0.04
  -6   7   1    0.02    0.04
   5   7  -1    0.00    0.03
   5   7  -1    0.05    0.06
  -5   7   1    0.11    0.09
  -5   7   1    0.00    0.03
  -5   7   1    0.16    0.14
   5   7  -1    0.06    0.12
  -4   7   1    0.45    0.11
   4   7  -1    0.46    0.13
   4   7  -1    0.48    0.12
  -4   7   1    0.65    0.16
  -3   7   1    0.08    0.05
  -3   7   1    0.00    0.02
   3   7  -1    0.06    0.03
   3   7  -1    0.07    0.08
  -3   7   1    0.10    0.08
   3   7  -1    0.12    0.06
  -2   7   1    0.30    0.06
   2   7  -1    0.49    0.11
   2   7  -1    0.36    0.08
   1   7  -1    0.45    0.07
   0   7  -1    0.12    0.03
   0   7  -1    0.00    0.01
  -1   7  -1    0.01    0.02
  -1   7  -1    0.11    0.04
   1   7   1    0.08    0.04
   1   7   1    0.01    0.02
   2   7   1    0.01    0.02
  -2   7  -1    0.01    0.02
   2   7   1    0.11    0.05
  -2   7  -1    0.36    0.08
  -3   7  -1    0.62    0.12
   3   7   1    0.34    0.10
  -4   7  -1    0.79    0.16
   4   7   1    0.74    0.15
  -5   7  -1    0.16    0.11
   5   7   1    0.23    0.11
  -6   7  -1    0.08    0.10
  -6   7  -1    0.03    0.04
   6   7   1    0.19    0.13
   6   7   1   -0.02    0.04
  16   0  -2    0.50    0.41
 -16   0   2    0.33    0.33
  15   0  -2    0.06    0.28
 -15   0   2    0.52    0.34
  14   0  -2    2.00    0.57
 -14   0   2    1.97    0.48
  13   0  -2    0.06    0.10
  13   0  -2    0.32    0.30
 -13   0   2    0.01    0.22
 -13   0   2   -0.01    0.05
 -12   0   2   -0.02    0.04
  12   0  -2    0.02    0.08
 -12   0   2   -0.02    0.17
  12   0  -2   -0.21    0.21
  11   0  -2    0.07    0.15
  11   0  -2   -0.02    0.07
 -11   0   2    0.00    0.04
 -11   0   2   -0.02    0.14
   9   0  -2    0.20    0.14
   9   0  -2    0.00    0.05
  -9   0   2    0.19    0.13
  -8   0   2    4.91    0.48
  -8   0   2    5.01    0.59
   8   0  -2    5.31    0.55
  -8   0   2    4.71    0.47
   8   0  -2    5.14    0.49
   8   0  -2    4.99    0.65
  -7   0   2   11.59    0.79
   7   0  -2   11.92    0.82
   7   0  -2    9.84    0.83
  -7   0   2   12.23    0.87
   7   0  -2   10.30    0.84
  -7   0   2   10.79    0.79
  -6   0   2   24.92    1.50
   6   0  -2   23.85    1.57
  -6   0   2   27.67    1.56
   6   0  -2   30.36    1.65
   6   0  -2   22.27    1.53
   5   0  -2    0.77    0.20
  -5   0   2    1.20    0.20
  -5   0   2    1.44    0.24
   5   0  -2    0.70    0.15
   5   0  -2    0.86    0.19
  -5   0   2    1.10    0.17
   4   0  -2   56.50    2.84
  -4   0   2   46.82    2.66
   4   0  -2   45.18    2.71
  -4   0   2   52.05    2.82
  -4   0   2   51.99    2.78
   4   0  -2   45.99    2.76
   3   0  -2    0.47    0.12
  -3   0   2    0.45    0.10
   3   0  -2    0.41    0.11
  -3   0   2    0.42    0.12
   2   0  -2    0.55    0.11
  -2   0   2    0.73    0.12
  -2   0   2    0.57    0.10
   2   0  -2    0.62    0.10
   1   0  -2   98.09    5.15
  -1   0   2   92.76    5.17
   0   0   2    7.52    0.51
   0   0  -2    8.06    0.53
  -1   0  -2  184.85   10.16
   1   0   2  177.59   10.16
   1   0   2  204.95   10.19
   2   0   2    0.95    0.14
   2   0   2    0.73    0.12
  -2   0  -2    1.02    0.14
  -2   0  -2    0.54    0.11
  -3   0  -2  271.53   13.56
   3   0   2  266.42   13.00
   3   0   2  216.13   13.54
   3   0   2  254.81   13.57
  -3   0  -2  233.20   12.98
  -3   0  -2  270.83   13.57
   4   0   2   17.45    1.06
  -4   0  -2   18.53    1.05
  -4   0  -2   15.34    1.06
  -4   0  -2   18.35    1.09
   4   0   2   15.88    1.07
   4   0   2   17.19    1.10
  -5   0  -2    8.95    0.66
  -5   0  -2   10.38    0.66
   5   0   2    7.93    0.62
   5   0   2    6.95    0.61
   5   0   2    9.42    0.68
  -5   0  -2    8.34    0.62
   6   0   2   15.01    1.01
   6   0   2   15.44    1.01
  -6   0  -2   14.76    1.00
  -6   0  -2   13.66    1.00
  -6   0  -2   14.12    0.97
   6   0   2   14.49    1.03
   7   0   2   -0.03    0.04
  -7   0  -2   -0.03    0.08
  -7   0  -2    0.01    0.03
  -7   0  -2    0.00    0.07
   7   0   2   -0.01    0.09
  -7   0  -2    0.07    0.11
   7   0   2   -0.10    0.09
   7   0   2   -0.04    0.07
  -8   0  -2    1.65    0.34
   8   0   2    2.22    0.41
  10   0   2    5.87    0.79
 -10   0  -2    5.04    0.68
  11   0   2    8.13    1.01
  12   0   2    0.16    0.10
  12   0   2    0.57    0.37
 -12   0  -2   -0.01    0.05
 -12   0  -2    0.15    0.23
  13   0   2    0.88    0.42
 -13   0  -2    0.88    0.39
  14   0   2   -0.01    0.31
 -14   0  -2    0.19    0.30
  15   0   2    0.15    0.37
 -15   0  -2    0.88    0.41
  16  -1  -2   -0.16    0.33
 -16  -1   2   -0.09    0.29
  16   1  -2    0.44    0.45
  16   1  -2    0.32    0.57
 -16   1   2    0.13    0.34
  15  -1  -2   -0.09    0.27
 -15  -1   2    0.31    0.37
 -15   1   2    0.30    0.30
  15   1  -2    0.02    0.28
  15   1  -2    0.18    0.33
 -15   1   2    0.26    0.20
  14  -1  -2    0.52    0.38
 -14  -1   2    0.97    0.39
  14   1  -2    0.23    0.38
 -14   1   2    0.68    0.36
  14   1  -2    0.35    0.37
 -14   1   2    0.43    0.22
 -13  -1   2    1.80    0.44
  13  -1  -2    2.08    0.55
 -13   1   2    1.08    0.34
  13   1  -2    1.35    0.46
  12  -1  -2    5.34    0.83
 -12  -1   2    5.66    0.74
  12   1  -2    5.72    0.86
 -12   1   2    5.66    0.74
  11  -1  -2   24.37    1.80
 -11  -1   2   25.05    1.68
  11   1  -2   25.36    1.80
 -11   1   2   25.50    1.66
 -10  -1   2    9.20    0.76
  10  -1  -2    6.64    0.89
  10   1  -2    8.95    0.83
 -10   1   2    8.67    0.73
  -9  -1   2    0.45    0.20
  -9  -1   2    0.87    0.25
   9  -1  -2    0.35    0.21
   9  -1  -2    0.75    0.21
   9   1  -2    0.70    0.24
  -9   1   2    0.81    0.23
   8  -1  -2    1.99    0.38
   8  -1  -2    2.30    0.35
   8  -1  -2    2.58    0.42
  -8  -1   2    1.89    0.32
  -8  -1   2    2.45    0.34
  -8  -1   2    2.29    0.36
   8   1  -2    2.02    0.39
  -8   1   2    2.20    0.33
  -8   1   2    2.47    0.35
   8   1  -2    2.34    0.42
  -7  -1   2   43.20    2.54
   7  -1  -2   47.24    2.54
  -7  -1   2   44.04    2.44
   7  -1  -2   41.26    2.50
   7  -1  -2   45.71    2.59
  -7  -1   2   39.35    2.49
  -7   1   2   46.83    2.52
   7   1  -2   42.96    2.51
  -7   1   2   41.95    2.79
  -7   1   2   41.31    2.78
  -7   1   2   42.86    2.58
  -7   1   2   38.44    2.39
   7   1  -2   41.88    2.79
   7   1  -2   46.67    2.54
   7   1  -2   41.29    2.57
   7   1  -2   43.21    2.63
  -6  -1   2   34.71    2.08
  -6  -1   2   36.69    2.15
   6  -1  -2   34.73    2.15
  -6  -1   2   35.71    2.18
   6  -1  -2   36.76    2.21
   6   1  -2   36.08    2.21
  -6   1   2   40.07    2.16
   6   1  -2   35.66    2.39
  -6   1   2   39.97    2.23
   6   1  -2   38.72    2.41
   6   1  -2   34.99    2.15
  -6   1   2   43.01    2.10
  -6   1   2   35.91    2.39
   6   1  -2   37.26    2.27
   6   1  -2   33.56    2.14
   5  -1  -2   19.95    1.26
  -5  -1   2   17.75    1.23
   5  -1  -2   21.54    1.22
   5   1  -2   20.05    1.26
   5   1  -2   22.65    1.26
   5   1  -2   20.54    1.35
  -5   1   2   21.67    1.21
  -5   1   2   18.83    1.16
  -5   1   2   17.92    1.32
   5   1  -2   20.61    1.27
   5   1  -2   17.91    1.20
  -5   1   2   18.80    1.33
  -5   1   2   19.91    1.25
  -4  -1   2   32.57    1.88
   4  -1  -2   31.16    1.86
  -4  -1   2   30.86    1.90
   4  -1  -2   34.04    1.92
   4   1  -2   33.12    1.87
   4   1  -2   32.03    1.97
  -4   1   2   35.53    2.10
  -4   1   2   30.99    2.08
  -4   1   2   32.05    1.91
   4   1  -2   30.72    2.09
   4   1  -2   34.99    1.93
  -4   1   2   36.01    1.88
  -3  -1   2  347.44   17.39
   3  -1  -2  318.78   17.39
   3  -1  -2  300.42   17.35
  -3  -1   2  325.63   17.36
   3   1  -2  324.39   19.64
  -3   1   2  336.87   17.40
   3   1  -2  317.06   17.39
   3   1  -2  330.78   19.64
   3   1  -2  321.48   17.36
  -3   1   2  320.96   19.63
  -2  -1   2   86.35    4.56
   2  -1  -2   79.22    4.55
  -2  -1   2   76.68    4.57
   2  -1  -2   83.26    4.58
   2   1  -2   81.34    5.14
  -2   1   2   84.16    4.59
   2   1  -2   84.23    4.59
  -2   1   2   83.36    5.13
  -2   1   2   90.33    5.14
   2   1  -2   87.91    5.15
  -2   1   2   89.08    4.56
  -1  -1   2  814.45   42.30
   1  -1  -2  803.47   42.30
  -1   1   2  806.59   42.28
   1   1  -2  807.39   42.34
  -1   1   2  793.88   47.86
   1   1  -2  767.62   47.99
   1   1  -2  776.36   42.31
  -1   1   2  778.16   42.31
   0  -1  -2   53.89    3.10
   0  -1  -2   58.63    3.10
   0  -1   2   53.83    3.12
   0  -1   2   59.30    3.10
   0   1   2   57.49    3.10
   0   1  -2   56.61    3.10
   0   1   2   57.04    3.49
   0   1  -2   55.19    3.49
   0   1  -2   55.93    3.12
   0   1   2   57.10    3.12
   0   1   2   59.76    3.49
   0   1  -2   58.90    3.49
  -1  -1  -2    1.46    0.15
  -1  -1  -2    1.51    0.15
   1  -1   2    1.98    0.19
   1  -1   2    1.58    0.16
   1   1   2    1.50    0.16
  -1   1  -2    2.06    0.18
  -1   1  -2    1.87    0.17
   1   1   2    1.88    0.17
   1   1   2    1.66    0.17
  -1   1  -2    1.77    0.17
  -1   1  -2    1.64    0.17
   1   1   2    1.63    0.17
  -2  -1  -2   17.94    1.10
   2  -1   2   18.49    1.12
  -2  -1  -2   18.08    1.10
   2  -1   2   18.41    1.12
   2   1   2   19.04    1.23
  -2   1  -2   18.12    1.12
  -2   1  -2   20.02    1.23
   2   1   2   19.66    1.23
  -2   1  -2   19.90    1.12
   2   1   2   19.66    1.12
   2   1   2   18.86    1.12
  -2   1  -2   17.64    1.22
   3  -1   2    9.10    0.66
   3  -1   2    9.75    0.67
  -3  -1  -2   10.84    0.66
  -3  -1  -2    9.40    0.65
  -3   1  -2    9.11    0.65
   3   1   2   10.15    0.67
  -3   1  -2    9.35    0.66
   3   1   2   10.17    0.71
   3   1   2   10.46    0.67
  -3   1  -2    9.95    0.72
   3   1   2   10.55    0.71
  -3   1  -2    9.64    0.70
  -3   1  -2    9.96    0.67
  -4  -1  -2   32.13    2.02
  -4  -1  -2   32.76    2.03
   4  -1   2   34.86    2.05
   4  -1   2   38.40    2.06
   4   1   2   32.53    2.25
   4   1   2   35.46    2.25
  -4   1  -2   38.78    2.06
   4   1   2   36.53    2.07
   4   1   2   34.53    2.04
  -4   1  -2   38.67    2.28
   4   1   2   34.13    1.96
  -4   1  -2   33.04    2.25
  -4   1  -2   35.65    1.96
  -4   1  -2   34.37    2.05
  -5  -1  -2   10.19    0.73
   5  -1   2   11.12    0.76
   5  -1   2    9.84    0.73
  -5  -1  -2   10.90    0.73
  -5  -1  -2    9.91    0.72
   5   1   2   11.00    0.75
   5   1   2    9.76    0.71
  -5   1  -2    9.77    0.76
   5   1   2    9.63    0.77
   5   1   2   11.59    0.78
  -5   1  -2    9.79    0.73
  -5   1  -2   10.29    0.71
   5   1   2   10.32    0.78
  -5   1  -2   10.30    0.75
  -5   1  -2    9.14    0.77
   6  -1   2    2.40    0.33
   6  -1   2    2.15    0.33
   6  -1   2    2.07    0.34
  -6  -1  -2    2.29    0.32
  -6  -1  -2    2.12    0.31
  -6  -1  -2    2.30    0.34
  -6   1  -2    1.98    0.32
  -6   1  -2    3.17    0.41
   6   1   2    1.58    0.30
  -6   1  -2    2.71    0.37
   6   1   2    1.90    0.30
   6   1   2    2.46    0.37
  -6   1  -2    2.62    0.36
   6   1   2    2.38    0.34
   6   1   2    2.40    0.35
  -6   1  -2    2.26    0.34
   7  -1   2   30.30    1.99
  -7  -1  -2   31.18    1.95
  -7  -1  -2   32.51    2.02
   7  -1   2   29.58    1.96
   7   1   2   33.46    1.99
  -7   1  -2   35.29    1.95
  -7   1  -2   33.45    2.03
   7   1   2   36.02    2.09
  -8  -1  -2    3.19    0.44
   8  -1   2    3.01    0.43
   8  -1   2    2.57    0.46
  -8  -1  -2    3.59    0.51
  -8   1  -2    2.91    0.44
   8   1   2    3.20    0.50
  -9  -1  -2    3.71    0.55
   9  -1   2    4.14    0.62
  -9   1  -2    3.72    0.52
   9   1   2    4.49    0.64
  10  -1   2    0.14    0.17
 -10  -1  -2    0.21    0.19
 -10   1  -2    0.01    0.04
 -10   1  -2    0.23    0.18
  10   1   2    0.04    0.07
  10   1   2    0.05    0.16
  11  -1   2    9.45    0.97
 -11  -1  -2    9.81    0.90
 -11   1  -2    9.99    0.87
  11   1   2    9.73    0.94
  12  -1   2    1.94    0.50
 -12  -1  -2    1.88    0.46
 -12   1  -2    1.60    0.45
  12   1   2    2.95    0.66
 -13  -1  -2   -0.01    0.27
  13  -1   2    0.09    0.28
  13   1   2   -0.21    0.28
 -13   1  -2    0.37    0.24
 -13   1  -2    0.07    0.28
  13   1   2    0.40    0.35
 -14  -1  -2    0.19    0.28
  14  -1   2    0.48    0.39
  14   1   2   -0.15    0.37
 -14   1  -2    0.26    0.37
 -14   1  -2    0.12    0.20
  15  -1   2    1.96    0.61
 -15  -1  -2    1.99    0.57
  15   1   2    0.82    0.47
  15  -2  -2   -0.10    0.20
 -15  -2   2    0.02    0.25
 -15   2   2   -0.03    0.20
  15   2  -2    0.36    0.36
 -14  -2   2    0.22    0.29
  14  -2  -2    0.26    0.32
  14   2  -2    0.00    0.33
 -14   2   2    0.34    0.21
  13  -2  -2    1.38    0.46
 -13  -2   2    1.28    0.40
  13   2  -2    2.84    0.62
 -13   2   2    2.64    0.44
  12  -2  -2    2.87    0.63
 -12  -2   2    1.96    0.45
  11  -2  -2    2.74    0.57
 -11  -2   2    3.12    0.53
  11   2  -2    3.71    0.64
  -9  -2   2    2.15    0.37
   9  -2  -2    1.92    0.33
  -9   2   2    2.24    0.35
   9   2  -2    2.76    0.49
   8  -2  -2   24.82    1.52
  -8  -2   2   24.83    1.55
   8   2  -2   23.46    1.58
  -8   2   2   23.20    1.67
  -8   2   2   21.52    1.44
   8   2  -2   24.86    1.57
  -7  -2   2   28.79    1.85
   7  -2  -2   28.92    1.81
  -7   2   2   33.82    1.78
  -7   2   2   30.06    2.02
   7   2  -2   29.17    1.84
   7   2  -2   29.47    2.03
   7   2  -2   29.71    1.92
  -7   2   2   29.85    2.04
  -7   2   2   31.38    1.92
   7   2  -2   31.95    1.85
   6  -2  -2   54.93    3.08
  -6  -2   2   50.73    3.10
   6   2  -2   59.76    3.47
  -6   2   2   57.21    3.48
   6   2  -2   54.05    3.09
   6   2  -2   50.95    2.87
  -6   2   2   52.24    3.08
   6   2  -2   56.78    3.48
   6   2  -2   56.37    3.06
   6   2  -2   56.59    3.27
  -6   2   2   46.91    2.73
  -6   2   2   54.38    2.95
  -6   2   2   55.00    3.45
  -6   2   2   57.42    3.16
   6   2  -2   52.80    3.15
  -5  -2   2   43.79    2.67
   5  -2  -2   48.35    2.67
   5   2  -2   46.76    2.67
  -5   2   2   44.51    2.65
   5   2  -2   49.43    2.83
   5   2  -2   47.79    3.00
   5   2  -2   45.73    2.72
  -5   2   2   49.85    3.00
  -5   2   2   43.12    2.37
  -5   2   2   53.41    3.00
   5   2  -2   44.59    2.48
  -5   2   2   47.18    2.72
   5   2  -2   47.59    2.99
  -4  -2   2   85.15    5.02
   4  -2  -2   97.19    5.02
   4   2  -2   85.40    4.57
  -4   2   2   88.98    4.49
  -4   2   2   98.13    5.65
   4   2  -2   84.04    5.05
  -4   2   2   91.15    5.07
  -4   2   2   93.26    5.02
   4   2  -2   98.94    5.66
   4   2  -2   98.44    5.68
   4   2  -2   90.41    5.33
   4   2  -2   91.32    5.02
  -4   2   2   91.50    5.66
   3  -2  -2    5.24    0.37
  -3  -2   2    5.53    0.39
   3   2  -2    5.20    0.41
   3   2  -2    5.45    0.41
  -3   2   2    5.26    0.40
   3   2  -2    5.31    0.40
   3   2  -2    5.02    0.38
  -3   2   2    5.90    0.39
  -3   2   2    5.35    0.41
  -3   2   2    5.46    0.41
   2  -2  -2   38.68    2.05
   2   2  -2   34.93    2.31
   2   2  -2   35.84    2.10
  -2   2   2   40.05    2.32
  -2   2   2   35.31    2.30
  -2   2   2   38.07    2.08
   2   2  -2   38.20    2.08
  -2   2   2   36.85    2.11
   2   2  -2   39.58    2.34
  -1   2   2   18.87    1.12
   1   2  -2   20.03    1.15
   1   2  -2   20.81    1.13
  -1   2   2   16.24    1.22
   1   2  -2   22.29    1.25
  -1   2   2   20.12    1.15
  -1   2   2   21.50    1.23
   0   2  -2   38.98    2.60
   0   2   2   43.35    2.35
   0   2   2   41.10    2.33
   0   2   2   45.73    2.60
   0   2  -2   43.04    2.36
   0   2   2   38.83    2.60
   0   2  -2   42.28    2.33
   0   2  -2   47.35    2.61
  -1  -2  -2    7.13    0.44
   1  -2   2    7.12    0.47
   1   2   2    6.31    0.48
   1   2   2    7.75    0.47
  -1   2  -2    6.62    0.49
  -1   2  -2    7.43    0.47
   1   2   2    7.23    0.49
  -1   2  -2    7.86    0.50
   1   2   2    7.17    0.47
  -1   2  -2    7.62    0.49
   2  -2   2   13.05    0.83
  -2  -2  -2   14.12    0.81
   2   2   2   13.66    0.74
  -2   2  -2   12.89    0.76
  -2   2  -2   14.04    0.84
  -2   2  -2   12.73    0.83
   2   2   2   12.78    0.83
   2   2   2   13.57    0.91
   2   2   2   14.37    0.91
  -2   2  -2   14.43    0.91
   2   2   2   13.03    0.83
  -2   2  -2   13.37    0.90
   3  -2   2    2.70    0.27
  -3  -2  -2    2.84    0.26
   3   2   2    2.89    0.28
  -3   2  -2    3.20    0.29
  -3   2  -2    2.98    0.28
  -3   2  -2    2.75    0.27
   3   2   2    3.19    0.29
   3   2   2    2.80    0.27
  -3   2  -2    3.33    0.26
  -3   2  -2    3.53    0.30
   3   2   2    2.68    0.28
   3   2   2    2.99    0.25
   4  -2   2    0.35    0.12
  -4  -2  -2    0.57    0.13
   4   2   2    0.45    0.13
   4   2   2    0.45    0.13
  -4   2  -2    0.44    0.12
  -4   2  -2    0.49    0.14
  -4   2  -2    0.58    0.15
   4   2   2    0.52    0.13
   4   2   2    0.20    0.12
  -4   2  -2    0.39    0.13
   4   2   2    0.84    0.19
  -4   2  -2    0.45    0.14
  -4   2  -2    0.43    0.12
   4   2   2    0.44    0.13
   5  -2   2    3.82    0.38
  -5  -2  -2    4.01    0.37
  -5   2  -2    4.48    0.35
   5   2   2    3.66    0.39
   5   2   2    3.73    0.39
  -5   2  -2    4.08    0.36
   5   2   2    4.53    0.40
  -5   2  -2    4.43    0.41
  -5   2  -2    3.98    0.39
   5   2   2    3.37    0.37
  -5   2  -2    3.93    0.40
  -5   2  -2    3.79    0.38
   5   2   2    3.93    0.36
   5   2   2    3.88    0.40
   6  -2   2    9.06    0.76
  -6  -2  -2    9.25    0.74
  -6   2  -2   11.59    0.85
   6   2   2    9.77    0.81
  -6   2  -2   10.94    0.82
  -6   2  -2    9.92    0.72
   6   2   2   11.52    0.80
   6   2   2   10.81    0.83
  -8  -2  -2    5.08    0.53
   8  -2   2    5.19    0.53
   9  -2   2    1.69    0.36
  -9  -2  -2    2.06    0.37
   9   2   2    2.32    0.46
  -9   2  -2    2.53    0.41
 -10  -2  -2    0.02    0.18
  10  -2   2    0.09    0.17
  10   2   2    0.00    0.07
 -10   2  -2    0.00    0.04
  10   2   2    0.09    0.21
 -11  -2  -2    1.61    0.40
  11  -2   2    1.52    0.46
 -12  -2  -2    3.36    0.58
  12  -2   2    1.80    0.54
 -12   2  -2    2.71    0.46
  12   2   2    2.70    0.58
 -13  -2  -2    1.93    0.50
  13  -2   2    1.41    0.44
  13   2   2    1.01    0.44
 -13   2  -2    1.77    0.40
  14  -2   2    0.58    0.38
 -14  -2  -2    0.60    0.34
  14   2   2    1.37    0.59
 -14   2  -2    1.14    0.35
  15  -3  -2    0.74    0.45
 -15  -3   2    1.39    0.43
  15   3  -2    0.29    0.36
 -15   3   2    0.59    0.30
  14  -3  -2    0.07    0.27
 -14  -3   2    0.19    0.23
  14   3  -2    1.18    0.51
 -14   3   2    0.98    0.31
 -13  -3   2    0.87    0.36
  13  -3  -2    0.90    0.38
  13   3  -2    1.16    0.48
 -13   3   2    1.18    0.34
 -12  -3   2    0.84    0.33
  12  -3  -2    0.80    0.35
  12   3  -2    0.25    0.29
 -12   3   2    0.64    0.24
  11  -3  -2    1.32    0.39
 -11  -3   2    1.79    0.39
 -10  -3   2    0.67    0.26
  10  -3  -2    0.80    0.25
  10  -3  -2    1.04    0.34
 -10  -3   2    1.16    0.32
   9  -3  -2   19.35    1.39
  -9  -3   2   25.24    1.50
  -9   3   2   20.73    1.26
  -8  -3   2    0.55    0.17
   8  -3  -2    0.29    0.13
   8   3  -2    0.52    0.19
   8   3  -2    0.60    0.19
  -8   3   2    0.39    0.17
  -8   3   2    0.27    0.12
   7  -3  -2   19.34    1.23
  -7  -3   2   19.73    1.27
  -7   3   2   17.15    1.10
   7   3  -2   20.59    1.42
  -7   3   2   19.07    1.39
  -7   3   2   19.70    1.38
   7   3  -2   17.76    1.23
   7   3  -2   21.41    1.41
   7   3  -2   20.39    1.33
  -6  -3   2   17.79    1.11
   6  -3  -2   16.69    1.08
  -6   3   2   17.12    0.98
   6   3  -2   16.37    1.21
   6   3  -2   17.48    1.16
   6   3  -2   18.16    1.12
  -6   3   2   15.73    1.20
   6   3  -2   18.22    1.25
  -6   3   2   18.82    1.25
   6   3  -2   16.72    1.09
   5  -3  -2    1.68    0.22
  -5  -3   2    2.05    0.25
   5   3  -2    2.10    0.24
  -5   3   2    2.31    0.26
   5   3  -2    2.79    0.29
   5   3  -2    2.44    0.34
   5   3  -2    2.45    0.26
  -5   3   2    1.96    0.24
  -5   3   2    2.22    0.26
   5   3  -2    2.14    0.26
  -5   3   2    2.34    0.31
  -4  -3   2    2.72    0.23
   4  -3  -2    2.32    0.21
   4   3  -2    2.80    0.25
  -4   3   2    1.98    0.28
  -4   3   2    3.05    0.27
  -4   3   2    2.38    0.21
   4   3  -2    2.74    0.28
   4   3  -2    2.57    0.31
   4   3  -2    2.39    0.25
   4   3  -2    2.42    0.25
  -4   3   2    2.42    0.24
  -2   3   2    6.68    0.40
   2   3  -2    5.74    0.41
   2   3  -2    6.04    0.40
  -2   3   2    5.78    0.33
  -2   3   2    6.27    0.43
  -2   3   2    5.42    0.39
   1   3  -2    0.95    0.09
   1   3  -2    0.72    0.10
   1   3  -2    0.65    0.07
  -1   3   2    0.83    0.12
   0   3  -2    9.18    0.59
  -1   3  -2    3.02    0.25
   1   3   2    2.71    0.25
  -1   3  -2    3.26    0.24
   1   3   2    3.38    0.24
  -1   3  -2    2.98    0.24
  -1   3  -2    2.70    0.23
   1   3   2    3.09    0.20
  -3  -3  -2   25.57    1.41
   3  -3   2   24.31    1.43
   3   3   2   24.59    1.30
  -3   3  -2   23.96    1.60
  -3   3  -2   25.49    1.32
  -3   3  -2   23.64    1.46
   3   3   2   23.99    1.45
  -3   3  -2   25.19    1.61
   3   3   2   22.95    1.60
   3   3   2   26.30    1.62
   4  -3   2    4.37    0.38
  -4  -3  -2    4.78    0.37
   4   3   2    4.61    0.37
  -4   3  -2    4.77    0.41
   4   3   2    4.62    0.40
  -4   3  -2    4.73    0.42
  -4   3  -2    4.83    0.42
   4   3   2    4.59    0.42
   4   3   2    4.84    0.42
  -4   3  -2    4.08    0.35
  -5  -3  -2    0.76    0.16
   5  -3   2    0.71    0.17
  -5   3  -2    0.97    0.20
   5   3   2    0.92    0.20
   5   3   2    0.55    0.15
   5   3   2    0.76    0.19
  -5   3  -2    0.65    0.17
  -5   3  -2    1.14    0.21
   5   3   2    0.64    0.17
  -5   3  -2    0.51    0.17
   6  -3   2    2.99    0.38
  -6  -3  -2    2.64    0.33
   6   3   2    3.27    0.38
  -6   3  -2    3.31    0.38
  -6   3  -2    3.11    0.42
   6   3   2    3.26    0.38
  -6   3  -2    3.26    0.37
   6   3   2    2.81    0.40
  -7  -3  -2    4.71    0.44
   7  -3   2    3.50    0.46
  -7   3  -2    4.16    0.40
   7   3   2    3.73    0.51
   7   3   2    4.16    0.47
  -7   3  -2    4.25    0.48
   8  -3   2    9.23    0.81
  -8  -3  -2   10.41    0.80
  -8   3  -2    9.47    0.70
   8   3   2    9.45    0.79
   9  -3   2   -0.08    0.16
   9  -3   2    0.12    0.21
  -9  -3  -2    0.33    0.21
   9   3   2   -0.03    0.05
  -9   3  -2    0.01    0.04
  10  -3   2    0.54    0.28
 -10  -3  -2    1.72    0.40
  10   3   2    0.47    0.25
 -10   3  -2    0.31    0.14
 -11  -3  -2    0.24    0.26
  11  -3   2    0.32    0.28
 -11   3  -2    0.02    0.16
  11   3   2   -0.03    0.21
  12  -3   2    0.05    0.25
 -12  -3  -2    0.11    0.24
 -12   3  -2    0.20    0.18
  12   3   2    0.04    0.26
  13  -3   2    0.84    0.41
 -13  -3  -2    0.61    0.33
  13   3   2    0.42    0.34
 -13   3  -2    0.29    0.28
 -14   3  -2    0.30    0.25
  14  -4  -2   -0.15    0.28
 -14  -4   2   -0.03    0.24
 -14   4   2    0.41    0.25
  14   4  -2    0.19    0.32
 -13  -4   2    0.95    0.35
  13  -4  -2    0.28    0.31
  13   4  -2    0.12    0.35
 -13   4   2    0.74    0.29
  12  -4  -2    0.12    0.23
 -12  -4   2    0.55    0.29
 -12   4   2    0.36    0.22
  12   4  -2   -0.10    0.21
  11  -4  -2    0.14    0.23
 -11  -4   2    0.82    0.32
  11   4  -2    0.21    0.25
 -11   4   2    0.97    0.27
  10  -4  -2    0.71    0.31
 -10  -4   2    1.60    0.36
 -10   4   2    0.76    0.24
  10   4  -2    1.24    0.36
  -9  -4   2    2.86    0.46
   9  -4  -2    2.65    0.51
  -9   4   2    2.61    0.36
   9   4  -2    2.51    0.41
  -8   4   2    2.34    0.33
   8   4  -2    1.78    0.31
  -8   4   2    1.55    0.31
   8   4  -2    2.12    0.36
   7   4  -2   18.12    1.32
   7   4  -2   18.02    1.25
  -7   4   2   17.86    1.06
  -7   4   2   18.44    1.33
   7   4  -2   20.02    1.37
  -7   4   2   18.17    1.31
   7   4  -2   17.19    1.19
  -6  -4   2    5.62    0.42
   6  -4  -2    6.07    0.43
   6   4  -2    5.72    0.52
   6   4  -2    5.21    0.50
   6   4  -2    5.08    0.47
  -6   4   2    5.51    0.51
  -6   4   2    5.80    0.42
   6   4  -2    5.43    0.50
  -6   4   2    4.95    0.48
  -4   4   2    3.24    0.31
   4   4  -2    3.48    0.32
  -4   4   2    2.74    0.27
   4   4  -2    3.14    0.30
  -4   4   2    3.41    0.25
   4   4  -2    2.78    0.28
   4   4  -2    3.61    0.39
   3   4  -2    2.54    0.24
  -3   4   2    2.42    0.22
   3   4  -2    2.77    0.30
  -3   4   2    2.28    0.19
   3   4  -2    2.37    0.22
  -3   4   2    2.14    0.20
   2   4  -2    6.52    0.42
  -2   4   2    5.46    0.39
  -2   4   2    6.88    0.35
   0   4  -2    1.47    0.12
  -1   4  -2    4.31    0.31
  -1   4  -2    4.06    0.30
   1   4   2    4.70    0.31
  -1   4  -2    3.53    0.29
   1   4   2    4.18    0.25
   1   4   2    3.45    0.29
  -2   4  -2    6.08    0.45
   2   4   2    6.38    0.38
  -2   4  -2    6.47    0.42
  -2   4  -2    5.76    0.45
   2   4   2    6.70    0.46
   2   4   2    4.97    0.44
   3   4   2   30.29    1.93
  -3   4  -2   28.89    1.92
  -3   4  -2   29.85    1.58
   3   4   2   27.46    1.91
  -3   4  -2   31.20    1.93
   3   4   2   31.12    1.56
  -4   4  -2    4.22    0.35
  -5  -4  -2    4.45    0.36
   5  -4   2    4.49    0.40
  -5   4  -2    4.50    0.45
  -5   4  -2    4.60    0.39
   5   4   2    4.91    0.41
   5   4   2    4.33    0.45
   5   4   2    4.49    0.44
  -5   4  -2    5.22    0.46
   6   4   2    8.01    0.69
  -6   4  -2    7.01    0.66
   6   4   2    7.76    0.62
  -6   4  -2    8.15    0.70
   6   4   2    8.03    0.69
  -6   4  -2    7.95    0.58
  -7   4  -2    7.82    0.62
   7   4   2    9.60    0.77
  -7   4  -2    7.43    0.73
   7   4   2    8.35    0.70
   8  -4   2    1.82    0.41
  -8  -4  -2    2.38    0.45
   8   4   2    2.16    0.42
  -8   4  -2    2.07    0.35
  -9  -4  -2    3.29    0.52
   9  -4   2    2.22    0.50
   9   4   2    2.42    0.50
  -9   4  -2    2.10    0.37
 -10  -4  -2    0.28    0.23
  10  -4   2    0.23    0.24
 -10   4  -2    0.14    0.16
  10   4   2    0.34    0.27
  11  -4   2    0.55    0.36
 -11  -4  -2    0.84    0.33
 -11   4  -2    0.83    0.28
  11   4   2    0.11    0.23
  12  -4   2   -0.02    0.28
 -12  -4  -2   -0.11    0.20
  12   4   2   -0.17    0.28
 -12   4  -2   -0.04    0.15
  12  -5  -2   -0.20    0.25
 -12  -5   2   -0.10    0.18
  12   5  -2    0.05    0.28
 -12   5   2    0.03    0.14
  11  -5  -2    0.01    0.25
 -11  -5   2    0.08    0.19
 -11   5   2    0.04    0.17
  11   5  -2   -0.01    0.27
  10  -5  -2    0.19    0.27
 -10  -5   2    0.57    0.26
  10   5  -2    0.15    0.23
 -10   5   2    0.64    0.20
  -9  -5   2    0.75    0.26
   9  -5  -2    0.67    0.30
  -9   5   2    0.42    0.16
   9   5  -2    0.59    0.29
   9   5  -2    0.76    0.26
  -8  -5   2    8.34    0.70
  -8   5   2    8.15    0.59
   8   5  -2    7.62    0.72
   8   5  -2    8.15    0.71
  -7   5   2    0.90    0.21
   7   5  -2    0.83    0.23
  -7   5   2    0.99    0.20
   7   5  -2    1.23    0.25
   6   5  -2    0.41    0.14
  -6   5   2    0.64    0.15
   6   5  -2    0.73    0.19
  -6   5   2    0.36    0.12
   3   5  -2    3.45    0.31
   0   5  -2    0.04    0.03
   0   5  -2    0.00    0.01
  -1   5  -2    1.13    0.12
   1   5   2    0.88    0.10
  -1   5  -2    1.22    0.20
  -2   5  -2    5.02    0.40
   2   5   2    5.43    0.34
   2   5   2    4.64    0.39
  -2   5  -2    5.29    0.38
   3   5   2    3.12    0.28
   3   5   2    2.59    0.28
  -3   5  -2    3.06    0.29
  -3   5  -2    3.23    0.28
   4   5   2    2.24    0.26
  -4   5  -2    2.50    0.32
  -4   5  -2    2.07    0.29
   4   5   2    2.39    0.31
  -5   5  -2    0.71    0.17
   5   5   2    0.34    0.12
  -5   5  -2    0.74    0.18
   5   5   2    1.11    0.24
   6  -5   2    0.01    0.05
  -6  -5  -2   -0.01    0.05
  -6   5  -2    0.41    0.16
   6   5   2    0.19    0.11
  -6   5  -2    0.24    0.11
   6   5   2    0.23    0.16
  -7  -5  -2    1.36    0.32
   7  -5   2    1.10    0.32
   7   5   2    1.55    0.33
  -7   5  -2    1.06    0.24
  -8  -5  -2    0.13    0.17
   8  -5   2    0.12    0.19
  -8   5  -2    0.06    0.13
   8   5   2    0.12    0.20
  -9  -5  -2    0.02    0.19
   9  -5   2    0.10    0.22
   9   5   2    0.11    0.19
  -9   5  -2    0.06    0.14
 -10  -5  -2    0.60    0.30
  10  -5   2    0.37    0.31
  10   5   2   -0.05    0.23
 -10   5  -2    0.38    0.18
 -11  -5  -2    0.20    0.29
  11  -5   2    0.43    0.34
  11   5   2    0.31    0.35
 -11   5  -2    0.56    0.26
 -10   6   2    0.32    0.18
  10   6  -2    0.47    0.36
   9   6  -2    0.43    0.24
   9   6  -2   -0.05    0.24
  -9   6   2    0.27    0.18
  -8   6   2   -0.02    0.04
   8   6  -2   -0.06    0.05
   8   6  -2   -0.06    0.12
  -8   6   2   -0.19    0.12
   8   6  -2    0.13    0.25
   7   6  -2    0.15    0.15
  -7   6   2   -0.01    0.04
  -7   6   2    0.13    0.10
   7   6  -2    0.18    0.10
  -7   6   2    0.26    0.15
   7   6  -2    0.10    0.23
   6   6  -2    0.75    0.19
   6   6  -2    1.29    0.26
  -6   6   2    1.18    0.24
  -6   6   2    0.95    0.19
  -6   6   2    0.90    0.20
   6   6  -2    1.77    0.37
  -5   6   2    0.54    0.14
  -5   6   2    0.57    0.15
   5   6  -2    0.36    0.11
   5   6  -2    0.50    0.20
   5   6  -2    0.50    0.16
  -5   6   2    0.61    0.14
   4   6  -2    1.88    0.25
   4   6  -2    1.96    0.22
  -4   6   2    1.54    0.19
  -4   6   2    1.80    0.24
  -3   6   2    0.26    0.08
  -3   6   2    0.27    0.09
   3   6  -2    0.32    0.09
   3   6  -2    0.39    0.13
  -2   6   2    0.88    0.09
   2   6  -2    0.92    0.13
  -2   6   2    0.93    0.13
   1   6   2    0.31    0.07
  -1   6  -2    0.44    0.09
   2   6   2   -0.01    0.02
  -2   6  -2   -0.02    0.02
  -2   6  -2    0.00    0.05
   2   6   2   -0.01    0.05
  -3   6  -2    0.52    0.13
   3   6   2    0.47    0.12
  -4   6  -2    0.90    0.18
   4   6   2    0.63    0.14
  -4   6  -2    0.79    0.18
   4   6   2    1.15    0.23
   5   6   2   -0.01    0.03
   5   6   2    0.14    0.10
  -5   6  -2    0.11    0.11
   5   6   2    0.09    0.16
  -5   6  -2    0.06    0.08
  -5   6  -2    0.04    0.03
   6   6   2    0.29    0.14
  -6   6  -2    0.10    0.15
  -6   6  -2    0.03    0.04
   6   6   2    0.00    0.04
  -6   6  -2    0.09    0.10
   6   6   2    0.65    0.25
  -7   6  -2    0.00    0.04
  -7   6  -2   -0.14    0.13
   7   6   2    0.14    0.22
   7   6   2   -0.03    0.04
  -8   6  -2    0.64    0.24
   8   6   2    1.39    0.38
   9   6   2    0.15    0.25
  -9   6  -2    0.42    0.21
  -7   7   2    0.05    0.12
   7   7  -2    0.38    0.19
  -7   7   2    0.01    0.04
   7   7  -2    0.12    0.29
  -7   7   2    0.14    0.15
   7   7  -2   -0.09    0.05
   6   7  -2    0.32    0.17
   6   7  -2    0.61    0.16
  -6   7   2    0.30    0.13
  -6   7   2    0.66    0.20
   5   7  -2   -0.02    0.04
  -5   7   2    0.01    0.03
   5   7  -2    0.35    0.16
  -5   7   2    0.16    0.09
   5   7  -2    0.09    0.07
  -5   7   2    0.08    0.11
   4   7  -2    0.98    0.18
   4   7  -2    0.80    0.16
  -4   7   2    0.80    0.14
  -4   7   2    0.64    0.15
   3   7  -2    0.37    0.10
  -3   7   2    0.31    0.08
  -3   7   2    0.32    0.11
   3   7  -2    0.30    0.11
  -2   7   2    0.32    0.06
  -2   7   2    0.33    0.07
   2   7  -2    0.36    0.12
   2   7  -2    0.15    0.06
   1   7  -2    0.76    0.12
   0   7  -2    0.62    0.10
  -1   7  -2   -0.02    0.02
   1   7   2    0.01    0.02
  -1   7  -2    0.05    0.05
   1   7   2    0.00    0.04
  -2   7  -2    0.38    0.10
   2   7   2    0.27    0.08
   3   7   2    0.06    0.06
  -3   7  -2    0.01    0.03
   3   7   2   -0.01    0.03
  -3   7  -2    0.24    0.09
  -4   7  -2    0.21    0.09
  -4   7  -2    0.01    0.04
   4   7   2    0.06    0.07
   4   7   2   -0.03    0.03
  -5   7  -2    0.09    0.10
   5   7   2    0.03    0.07
  -5   7  -2    0.01    0.04
   5   7   2   -0.03    0.04
  -6   7  -2    0.25    0.17
 -16   0   3    0.21    0.32
  16   0  -3   -0.02    0.33
 -15   0   3    0.57    0.30
  15   0  -3    0.32    0.42
  14   0  -3    0.07    0.28
 -14   0   3    0.46    0.27
  13   0  -3    1.88    0.54
 -13   0   3    2.03    0.45
  12   0  -3    0.25    0.30
 -12   0   3    0.02    0.04
  12   0  -3   -0.04    0.08
 -12   0   3    0.10    0.16
 -11   0   3    2.86    0.47
  11   0  -3    2.98    0.60
   9   0  -3    8.12    0.78
   8   0  -3    5.10    0.62
  -8   0   3    4.51    0.45
  -8   0   3    4.40    0.46
  -8   0   3    5.23    0.54
   8   0  -3    4.42    0.63
   8   0  -3    5.48    0.49
   7   0  -3    0.48    0.19
  -7   0   3    0.61    0.18
   7   0  -3    1.00    0.24
   7   0  -3    0.40    0.13
  -7   0   3    0.96    0.23
   6   0  -3    1.97    0.27
  -6   0   3    1.99    0.28
  -6   0   3    2.29    0.31
   6   0  -3    2.44    0.34
   6   0  -3    1.21    0.27
  -5   0   3    5.30    0.43
   5   0  -3    5.57    0.48
  -5   0   3    5.11    0.41
   5   0  -3    5.17    0.42
  -5   0   3    5.70    0.48
   5   0  -3    5.83    0.49
  -4   0   3   -0.02    0.05
   4   0  -3    0.07    0.08
   4   0  -3    0.00    0.08
   4   0  -3   -0.01    0.03
  -4   0   3   -0.03    0.04
  -4   0   3    0.01    0.06
  -3   0   3  559.32   27.26
  -3   0   3  507.95   28.45
  -3   0   3  527.02   28.50
   3   0  -3  533.64   28.46
   3   0  -3  570.90   27.33
   3   0  -3  497.27   28.50
  -2   0   3  236.32   12.95
   2   0  -3  240.29   12.91
   2   0  -3  253.54   12.96
  -2   0   3  232.80   12.91
  -1   0   3  202.28   11.25
   1   0  -3  221.92   11.26
  -1   0   3  201.50   11.29
   1   0  -3  212.97   11.29
   0   0  -3  183.54   10.14
   0   0   3  190.25   10.15
   0   0   3  190.57   10.12
   0   0  -3  188.33   10.12
   1   0   3   16.90    0.99
  -1   0  -3   15.82    0.98
   1   0   3   16.66    0.97
  -1   0  -3   14.74    0.96
  -2   0  -3    4.67    0.40
  -2   0  -3    5.57    0.41
   2   0   3    5.40    0.41
  -2   0  -3    5.45    0.41
   2   0   3    6.22    0.40
   2   0   3    5.23    0.42
  -3   0  -3    1.15    0.19
  -3   0  -3    1.67    0.25
   3   0   3    1.18    0.21
  -3   0  -3    1.01    0.18
   3   0   3    1.71    0.24
   3   0   3    1.48    0.22
  -4   0  -3  111.43    5.99
   4   0   3  113.68    5.76
  -4   0  -3  118.38    6.01
   4   0   3  106.00    6.00
   4   0   3  101.09    5.99
  -4   0  -3  102.12    5.74
  -5   0  -3   47.95    2.78
  -5   0  -3   48.55    2.68
   5   0   3   48.77    2.81
   5   0   3   46.85    2.79
   5   0   3   45.19    2.69
  -5   0  -3   50.01    2.80
  -6   0  -3   11.83    0.89
   6   0   3   13.76    0.93
   6   0   3   11.95    0.94
  -6   0  -3   13.07    0.94
   6   0   3   13.69    0.95
  -6   0  -3   13.11    0.92
  -8   0  -3    0.02    0.03
   8   0   3   -0.04    0.05
   8   0   3    0.01    0.11
  -8   0  -3    0.19    0.15
  -9   0  -3    5.02    0.64
   9   0   3    4.13    0.63
  10   0   3    1.89    0.44
 -10   0  -3    2.37    0.46
 -11   0  -3   -0.17    0.19
  11   0   3    0.00    0.22
 -11   0  -3    0.01    0.05
  11   0   3   -0.01    0.09
 -12   0  -3    0.59    0.29
  12   0   3    0.21    0.29
  13   0   3    0.71    0.40
 -13   0  -3    1.10    0.45
  14   0   3    0.82    0.44
 -14   0  -3    1.25    0.50
  16  -1  -3    0.71    0.51
 -16  -1   3    0.38    0.36
  16   1  -3    0.45    0.51
 -16   1   3    0.59    0.36
  16   1  -3    0.71    0.55
 -16   1   3    0.45    0.40
 -15  -1   3    0.63    0.32
  15  -1  -3    0.19    0.32
 -15   1   3    0.46    0.24
  15   1  -3    0.57    0.44
 -15   1   3    0.50    0.32
  15   1  -3    0.64    0.46
 -14  -1   3    2.76    0.58
  14  -1  -3    1.85    0.53
  14   1  -3    2.52    0.59
  14   1  -3    2.98    0.72
 -14   1   3    3.66    0.66
 -13  -1   3    6.01    0.79
  13  -1  -3    5.09    0.88
 -13   1   3    5.52    0.76
  13   1  -3    7.10    0.98
 -12  -1   3    4.02    0.62
  12  -1  -3    3.11    0.62
 -12   1   3    4.53    0.61
  12   1  -3    3.97    0.71
  11  -1  -3    0.35    0.24
 -11  -1   3    0.03    0.16
 -11   1   3    0.41    0.21
 -11   1   3   -0.01    0.03
  11   1  -3    0.18    0.18
  11   1  -3   -0.01    0.07
 -10  -1   3    0.58    0.21
  10  -1  -3    0.45    0.23
 -10   1   3    0.49    0.18
  10   1  -3    0.47    0.22
  -9  -1   3    1.05    0.26
   9  -1  -3    0.84    0.24
  -9  -1   3    0.89    0.23
   9  -1  -3    0.76    0.27
   9   1  -3    0.86    0.28
  -9   1   3    0.89    0.21
   8  -1  -3    1.64    0.34
  -8  -1   3    1.71    0.31
   8  -1  -3    1.44    0.28
  -8  -1   3    1.21    0.25
  -8  -1   3    1.13    0.24
   8  -1  -3    1.22    0.31
  -8   1   3    1.63    0.28
  -8   1   3    1.63    0.29
   8   1  -3    1.69    0.36
   8   1  -3    1.62    0.35
   7  -1  -3    4.27    0.52
  -7  -1   3    4.63    0.42
   7  -1  -3    3.12    0.47
   7  -1  -3    4.18    0.40
  -7  -1   3    4.50    0.41
  -7  -1   3    4.75    0.47
   7   1  -3    4.72    0.46
  -7   1   3    3.82    0.48
  -7   1   3    4.24    0.41
   7   1  -3    3.72    0.49
  -7   1   3    3.98    0.42
  -7   1   3    5.19    0.47
   7   1  -3    4.86    0.59
   7   1  -3    3.91    0.40
  -7   1   3    4.27    0.39
  -6  -1   3   14.19    0.97
   6  -1  -3   15.74    1.06
  -6  -1   3   16.69    1.01
   6  -1  -3   15.96    1.00
  -6  -1   3   16.10    1.05
   6   1  -3   16.07    1.04
  -6   1   3   14.87    1.09
  -6   1   3   16.20    1.00
   6   1  -3   13.88    0.98
   6   1  -3   13.04    1.07
   6   1  -3   14.34    1.04
   6   1  -3   14.99    1.09
   6   1  -3   15.64    1.05
  -6   1   3   14.06    1.07
  -6   1   3   15.12    1.05
  -6   1   3   17.08    0.97
   5  -1  -3   22.34    1.39
   5  -1  -3   20.50    1.32
  -5  -1   3   22.74    1.38
  -5  -1   3   23.71    1.34
   5   1  -3   25.19    1.35
   5   1  -3   20.40    1.38
  -5   1   3   22.11    1.28
  -5   1   3   24.85    1.41
   5   1  -3   21.73    1.39
  -5   1   3   20.72    1.46
   5   1  -3   21.57    1.48
  -5   1   3   20.80    1.33
   5   1  -3   21.23    1.35
  -5   1   3   21.84    1.48
   5   1  -3   21.01    1.47
  -4  -1   3   29.49    1.64
  -4  -1   3   28.36    1.67
   4  -1  -3   28.66    1.69
   4  -1  -3   31.46    1.63
  -4   1   3   27.25    1.82
   4   1  -3   26.29    1.62
   4   1  -3   27.07    1.67
   4   1  -3   26.77    1.63
   4   1  -3   30.68    1.82
   4   1  -3   27.64    1.72
  -4   1   3   25.87    1.80
  -4   1   3   27.21    1.63
  -4   1   3   26.57    1.67
   4   1  -3   29.05    1.83
   3  -1  -3   52.06    2.82
  -3  -1   3   52.76    2.82
  -3  -1   3   49.20    2.85
   3  -1  -3   48.14    2.85
  -3   1   3   53.22    2.83
   3   1  -3   52.70    2.83
   3   1  -3   52.48    2.87
  -3   1   3   51.30    3.16
   3   1  -3   46.11    3.15
   3   1  -3   47.68    3.16
  -3   1   3   55.52    3.17
  -3   1   3   47.67    2.86
  -2  -1   3   30.01    1.73
   2  -1  -3   28.22    1.72
   2  -1  -3   31.63    1.77
  -2  -1   3   29.73    1.76
   2   1  -3   30.73    1.74
   2   1  -3   33.11    1.94
  -2   1   3   32.35    1.78
   2   1  -3   28.51    1.76
  -2   1   3   32.52    1.94
  -2   1   3   28.11    1.92
  -2   1   3   29.69    1.73
   2   1  -3   33.28    1.95
  -1  -1   3  130.98    7.23
  -1  -1   3  135.99    7.27
   1  -1  -3  136.37    7.26
   1  -1  -3  127.14    7.23
  -1   1   3  131.82    7.27
   1   1  -3  145.09    7.28
   1   1  -3  141.90    8.18
  -1   1   3  131.79    7.23
  -1   1   3  137.78    8.17
   1   1  -3  131.02    7.24
  -1   1   3  130.91    8.15
   1   1  -3  129.99    8.16
   0  -1  -3   71.09    3.82
   0  -1  -3   68.29    3.83
   0  -1   3   71.59    3.82
   0  -1   3   67.87    3.85
   0   1  -3   71.10    3.85
   0   1  -3   70.61    4.31
   0   1   3   72.69    3.86
   0   1   3   72.28    3.82
   0   1  -3   63.04    4.29
   0   1   3   71.61    4.30
   0   1  -3   69.58    3.82
  -1  -1  -3   47.01    2.54
  -1  -1  -3   46.16    2.55
   1  -1   3   43.34    2.56
   1  -1   3   46.49    2.54
   1   1   3   46.37    2.85
  -1   1  -3   45.81    2.57
   1   1   3   42.79    2.54
  -1   1  -3   46.96    2.86
  -1   1  -3   46.88    2.55
  -1   1  -3   47.64    2.85
   1   1   3   44.94    2.57
   1   1   3   43.02    2.84
   2  -1   3    7.87    0.55
  -2  -1  -3    8.16    0.55
   2  -1   3    7.23    0.56
  -2  -1  -3    7.51    0.54
  -2   1  -3    7.19    0.54
  -2   1  -3    7.26    0.58
   2   1   3    8.48    0.60
   2   1   3    8.77    0.60
   2   1   3    8.63    0.56
   2   1   3    7.35    0.56
  -2   1  -3    8.99    0.59
  -2   1  -3    8.26    0.60
  -3  -1  -3   46.39    2.85
   3  -1   3   51.63    2.89
   3  -1   3   48.38    2.89
  -3  -1  -3   51.41    2.87
  -3   1  -3   57.51    2.78
  -3   1  -3   54.08    2.89
  -3   1  -3   53.76    2.89
  -3   1  -3   49.93    3.20
   3   1   3   51.35    3.21
  -3   1  -3   48.48    3.21
   3   1   3   48.05    2.75
   3   1   3   49.64    2.89
   3   1   3   51.81    2.89
   3   1   3   50.51    3.20
  -4  -1  -3   83.13    4.52
   4  -1   3   79.49    4.55
  -4  -1  -3   83.26    4.52
   4  -1   3   82.02    4.55
  -4   1  -3   85.02    4.35
  -4   1  -3   90.66    4.55
   4   1   3   79.06    4.53
   4   1   3   81.99    4.36
   4   1   3   76.51    4.54
  -4   1  -3   76.96    4.53
   4   1   3   79.96    5.06
  -4   1  -3   79.84    5.06
  -4   1  -3   79.45    5.07
  -5  -1  -3    7.54    0.58
   5  -1   3    6.29    0.58
   5  -1   3    6.97    0.59
  -5  -1  -3    8.27    0.59
  -5  -1  -3    7.89    0.59
   5  -1   3    6.04    0.56
   5   1   3    7.20    0.58
  -5   1  -3    6.95    0.57
  -5   1  -3    6.92    0.59
  -5   1  -3    7.25    0.55
  -5   1  -3    7.45    0.61
   5   1   3    6.51    0.58
  -5   1  -3    6.91    0.58
   5   1   3    6.85    0.61
   5   1   3    7.08    0.61
   5   1   3    6.86    0.55
   6  -1   3    2.42    0.37
  -6  -1  -3    2.05    0.34
  -6  -1  -3    3.72    0.45
  -6  -1  -3    3.09    0.39
   6  -1   3    2.56    0.38
  -6   1  -3    2.81    0.39
   6   1   3    3.02    0.42
  -6   1  -3    2.61    0.40
  -6   1  -3    2.56    0.36
  -6   1  -3    2.93    0.40
   6   1   3    3.25    0.43
   6   1   3    2.46    0.36
  -7  -1  -3   10.02    0.81
   7  -1   3   10.12    0.82
   7  -1   3    9.42    0.81
  -7  -1  -3   11.03    0.84
  -7   1  -3   10.47    0.79
   7   1   3   11.40    0.84
  -9  -1  -3    2.42    0.46
   9  -1   3    2.02    0.45
  -9   1  -3    1.97    0.38
   9   1   3    2.64    0.48
  10  -1   3    7.19    0.91
 -10  -1  -3    6.37    0.82
  10   1   3    6.53    0.86
 -10   1  -3    7.40    0.69
  11  -1   3    6.04    0.89
 -11  -1  -3    6.28    0.84
 -11   1  -3    7.85    0.88
  11   1   3    7.03    0.95
 -12  -1  -3    0.82    0.33
  12  -1   3    0.58    0.32
  12   1   3    0.67    0.39
 -12   1  -3    1.18    0.40
 -13  -1  -3    0.63    0.35
  13  -1   3    0.16    0.30
 -13   1  -3    0.61    0.40
 -13   1  -3    0.24    0.21
  13   1   3    0.55    0.38
  13   1   3    0.31    0.34
 -14  -1  -3    0.52    0.38
  14  -1   3    0.50    0.41
 -14   1  -3    1.14    0.37
  14   1   3    1.36    0.54
  14   1   3    0.01    0.37
 -14   1  -3    1.01    0.44
  16   2  -3    0.89    0.55
 -16   2   3    1.05    0.35
  15  -2  -3    0.26    0.36
 -15  -2   3    0.02    0.23
 -15   2   3    0.49    0.24
  15   2  -3    0.08    0.38
  14  -2  -3    0.09    0.29
 -14  -2   3    0.17    0.24
  14   2  -3    0.34    0.38
 -14   2   3    0.02    0.17
  13  -2  -3    0.83    0.37
 -13  -2   3    0.69    0.28
 -13   2   3    0.61    0.24
  13   2  -3    0.44    0.35
  11  -2  -3    9.26    0.95
 -11  -2   3    9.58    0.85
  11   2  -3    9.30    0.91
  -9  -2   3    0.43    0.19
   9  -2  -3    0.52    0.19
   9   2  -3    0.24    0.18
  -9   2   3    0.43    0.17
   7  -2  -3    3.57    0.36
  -7  -2   3    3.21    0.42
  -7   2   3    3.25    0.44
  -7   2   3    3.64    0.39
   7   2  -3    2.99    0.37
   7   2  -3    3.21    0.35
   7   2  -3    3.56    0.40
  -7   2   3    3.50    0.41
   7   2  -3    3.73    0.51
  -7   2   3    3.76    0.40
   7   2  -3    2.65    0.36
   6  -2  -3   18.25    1.23
  -6  -2   3   19.48    1.28
  -6   2   3   21.20    1.32
   6   2  -3   17.81    1.36
  -6   2   3   19.76    1.11
   6   2  -3   22.02    1.41
   6   2  -3   20.47    1.26
  -6   2   3   22.06    1.27
   6   2  -3   21.15    1.23
  -6   2   3   22.18    1.40
   6   2  -3   19.29    1.30
   6   2  -3   18.53    1.26
  -6   2   3   19.92    1.37
  -6   2   3   18.60    1.18
   6   2  -3   18.73    1.31
   5  -2  -3  190.35    9.50
   5   2  -3  185.80    9.18
   5   2  -3  175.52   10.72
  -5   2   3  166.35    8.51
  -5   2   3  159.13    9.48
  -5   2   3  169.57    9.55
   5   2  -3  178.21    9.56
  -5   2   3  182.77   10.73
   5   2  -3  171.83    9.49
  -5   2   3  176.97   10.71
   5   2  -3  178.90   10.73
   5   2  -3  172.26    8.62
   5   2  -3  171.47   10.09
  -4  -2   3   22.15    1.43
   4  -2  -3   26.07    1.41
   4   2  -3   23.25    1.42
   4   2  -3   23.73    1.57
   4   2  -3   24.39    1.35
   4   2  -3   24.08    1.59
  -4   2   3   25.24    1.48
  -4   2   3   23.14    1.42
   4   2  -3   25.49    1.52
  -4   2   3   23.23    1.57
  -4   2   3   24.83    1.26
  -4   2   3   25.00    1.59
   4   2  -3   22.53    1.46
   3  -2  -3  151.77    7.76
  -3  -2   3  141.08    7.79
   3   2  -3  148.80    8.79
  -3   2   3  144.43    7.82
   3   2  -3  143.75    7.78
   3   2  -3  139.09    7.82
  -3   2   3  146.12    8.77
  -3   2   3  149.03    8.77
  -3   2   3  140.83    7.77
  -3   2   3  139.12    6.97
   3   2  -3  134.14    8.76
   3   2  -3  148.22    7.06
   2  -2  -3   43.60    2.39
  -2  -2   3   41.69    2.42
  -2   2   3   44.37    2.45
   2   2  -3   43.90    2.45
   2   2  -3   46.73    2.72
  -2   2   3   41.98    2.68
  -2   2   3   40.99    2.40
   2   2  -3   42.23    2.69
   2   2  -3   45.10    2.42
  -2   2   3   43.27    2.69
   1  -2  -3   14.76    0.85
  -1  -2   3   14.58    0.88
  -1   2   3   14.27    0.90
  -1   2   3   15.25    0.94
   1   2  -3   14.58    0.87
   1   2  -3   13.81    0.95
   1   2  -3   15.12    0.96
   1   2  -3   14.45    0.90
  -1   2   3   13.73    0.94
  -1   2   3   14.34    0.86
   0  -2   3    3.87    0.32
   0  -2  -3    4.00    0.30
   0   2   3    3.84    0.33
   0   2   3    4.26    0.33
   0   2  -3    4.10    0.33
   0   2  -3    4.71    0.33
   0   2   3    4.59    0.33
   0   2  -3    4.54    0.34
   0   2   3    4.36    0.31
   0   2  -3    3.98    0.34
   1  -2   3    8.40    0.59
  -1  -2  -3    8.58    0.55
   1   2   3    8.70    0.57
   1   2   3    8.50    0.62
  -1   2  -3    9.52    0.63
  -1   2  -3    8.93    0.60
  -1   2  -3    8.78    0.58
   1   2   3    8.68    0.50
  -1   2  -3    7.60    0.60
   1   2   3    9.30    0.62
  -1   2  -3    8.67    0.55
   1   2   3    8.97    0.60
  -2  -2  -3  100.18    5.45
   2  -2   3   95.86    5.49
  -2   2  -3   99.46    5.48
   2   2   3  105.08    5.49
  -2   2  -3  107.00    5.52
   2   2   3   99.70    4.91
  -2   2  -3  100.07    4.96
  -2   2  -3  100.84    6.16
  -2   2  -3   98.96    6.16
   2   2   3   99.06    5.50
   2   2   3   97.31    6.17
  -3  -2  -3   87.34    5.02
   3  -2   3   95.98    5.07
   3   2   3   94.31    4.53
  -3   2  -3   89.51    5.67
   3   2   3   90.44    5.05
  -3   2  -3   99.53    5.07
  -3   2  -3   79.15    5.64
   3   2   3   88.53    5.66
  -3   2  -3   89.98    4.55
   3   2   3   97.56    5.68
   3   2   3   92.91    5.06
  -3   2  -3   94.86    5.06
   4  -2   3   18.09    1.15
  -4  -2  -3   18.77    1.12
  -4   2  -3   18.98    1.25
  -4   2  -3   17.89    1.15
   4   2   3   17.31    1.15
   4   2   3   17.08    1.09
   4   2   3   17.88    1.24
  -4   2  -3   16.61    1.13
  -4   2  -3   16.48    1.02
  -4   2  -3   17.45    1.08
   4   2   3   18.14    1.03
   4   2   3   17.25    1.23
   4   2   3   17.88    1.14
  -4   2  -3   17.92    1.23
  -5  -2  -3   32.30    1.93
   5  -2   3   30.54    1.96
  -5   2  -3   32.94    2.15
  -5   2  -3   32.08    1.86
  -5   2  -3   35.30    1.99
   5   2   3   31.94    2.15
   5   2   3   34.05    2.16
  -5   2  -3   30.25    1.75
   5   2   3   30.51    1.76
   5   2   3   34.38    1.97
  -5   2  -3   32.60    2.16
   5   2   3   31.79    1.88
  -6  -2  -3    1.10    0.23
   6  -2   3    0.91    0.23
  -6   2  -3    1.38    0.27
   6   2   3    1.45    0.29
   6   2   3    1.65    0.30
  -6   2  -3    1.24    0.27
  -7   2  -3    5.35    0.50
  -8  -2  -3    4.06    0.53
   8  -2   3    4.45    0.57
  -8   2  -3    4.62    0.56
   8   2   3    3.50    0.55
  -9  -2  -3    3.73    0.58
   9  -2   3    3.38    0.57
   9   2   3    4.13    0.63
  -9   2  -3    4.53    0.58
 -11  -2  -3    1.91    0.48
  11  -2   3    2.21    0.56
 -11   2  -3    2.49    0.43
  11   2   3    1.27    0.42
  12  -2   3    0.61    0.34
 -12  -2  -3    0.44    0.28
 -12   2  -3    0.21    0.22
  12   2   3    0.21    0.30
  13  -2   3    0.05    0.28
 -13  -2  -3    0.05    0.25
 -13   2  -3    0.25    0.22
  13   2   3    0.08    0.27
 -14  -2  -3   -0.20    0.26
  14  -2   3    0.08    0.27
 -14   2  -3   -0.03    0.19
  14   2   3   -0.17    0.34
 -15  -3   3   -0.23    0.19
  15  -3  -3    0.41    0.39
 -15   3   3   -0.07    0.18
  15   3  -3   -0.15    0.31
 -14  -3   3    0.00    0.17
  14  -3  -3    0.06    0.28
 -14   3   3    0.29    0.19
  14   3  -3    0.22    0.36
  13  -3  -3    0.24    0.30
 -13  -3   3    0.16    0.24
  13   3  -3    0.60    0.36
 -13   3   3    0.09    0.17
 -12  -3   3    2.63    0.52
  12  -3  -3    2.28    0.56
  12   3  -3    2.01    0.50
 -12   3   3    2.20    0.40
  11  -3  -3    0.75    0.33
 -11  -3   3    0.62    0.25
  10  -3  -3    2.52    0.53
 -10  -3   3    1.98    0.40
  10  -3  -3    2.25    0.38
 -10  -3   3    2.61    0.43
   9  -3  -3   15.76    1.08
  -9  -3   3   14.47    1.10
  -9   3   3   14.41    0.95
   9   3  -3   15.35    1.12
   8  -3  -3   -0.01    0.04
   8  -3  -3    0.36    0.14
  -8  -3   3    0.35    0.16
  -8  -3   3    0.00    0.03
   8   3  -3    0.11    0.11
   8   3  -3    0.22    0.16
  -8   3   3    0.09    0.11
  -8   3   3    0.18    0.11
   8   3  -3    0.24    0.17
  -7  -3   3    7.99    0.64
   7  -3  -3    7.36    0.60
   7   3  -3    7.52    0.66
   7   3  -3    9.66    0.73
  -7   3   3    9.15    0.72
  -7   3   3    7.82    0.55
  -7   3   3    7.46    0.67
   7   3  -3    7.66    0.69
   7   3  -3    8.11    0.65
   6  -3  -3   10.27    0.70
  -6  -3   3   11.68    0.75
  -6   3   3   10.91    0.81
   6   3  -3   10.91    0.82
  -6   3   3    9.57    0.77
   6   3  -3   10.45    0.73
  -6   3   3    9.56    0.77
  -6   3   3   10.22    0.64
   6   3  -3    9.08    0.78
   6   3  -3    9.82    0.73
   6   3  -3    9.53    0.74
   5  -3  -3    0.63    0.13
  -5  -3   3    0.59    0.13
   5   3  -3    0.56    0.14
   5   3  -3    0.92    0.19
   5   3  -3    0.39    0.13
   5   3  -3    0.67    0.18
   5   3  -3    0.76    0.17
  -5   3   3    0.66    0.16
  -5   3   3    0.57    0.13
  -5   3   3    0.58    0.17
  -4  -3   3   27.04    1.51
   4  -3  -3   24.88    1.49
   4   3  -3   25.60    1.53
   4   3  -3   28.15    1.46
   4   3  -3   25.43    1.71
  -4   3   3   26.74    1.58
  -4   3   3   25.19    1.68
  -4   3   3   26.94    1.70
   4   3  -3   24.98    1.70
  -4   3   3   26.73    1.36
   3  -3  -3   14.97    0.84
  -3  -3   3   14.00    0.85
   3   3  -3   13.55    0.96
  -3   3   3   13.63    0.95
  -3   3   3   15.31    0.97
   3   3  -3   13.76    0.85
   3   3  -3   15.55    1.00
  -3   3   3   14.29    0.93
  -3   3   3   14.60    0.78
   3   3  -3   14.45    0.89
   2   3  -3    0.37    0.09
   2   3  -3    0.31    0.08
   2   3  -3    0.29    0.08
  -2   3   3    0.35    0.08
  -2   3   3    0.42    0.08
  -2   3   3    0.11    0.09
  -2   3   3    0.48    0.08
   2   3  -3    0.25    0.11
   1   3  -3   52.61    2.84
   1   3  -3   47.76    3.18
   1   3  -3   54.21    3.20
  -1   3   3   46.70    3.16
  -1   3   3   52.35    2.53
  -1   3   3   49.74    2.88
  -1   3   3   57.52    3.18
   1   3  -3   51.77    2.60
   0   3   3   26.02    1.47
   0   3  -3   23.60    1.25
   0   3   3   22.25    1.36
   0   3  -3   22.85    1.48
   0   3  -3   22.83    1.33
   0   3   3   23.67    1.17
   0   3   3   21.84    1.46
   0   3  -3   21.64    1.46
   2  -3   3   44.96    2.49
  -2  -3  -3   43.65    2.44
   2   3   3   45.21    2.78
   2   3   3   44.20    2.23
  -2   3  -3   45.52    2.51
   2   3   3   42.66    2.79
  -2   3  -3   43.65    2.28
  -2   3  -3   44.28    2.79
   2   3   3   43.95    2.52
   3  -3   3    5.50    0.45
  -3  -3  -3    6.38    0.43
  -3   3  -3    6.33    0.48
   3   3   3    6.14    0.41
  -3   3  -3    6.31    0.44
   3   3   3    5.55    0.48
  -3   3  -3    5.92    0.50
  -3   3  -3    5.49    0.48
   3   3   3    5.46    0.48
   3   3   3    5.85    0.49
   4  -3   3   15.25    1.05
  -4  -3  -3   16.56    1.02
  -4   3  -3   16.75    1.08
   4   3   3   16.42    1.15
  -4   3  -3   14.26    0.95
   4   3   3   17.40    1.17
  -4   3  -3   16.07    1.14
   4   3   3   15.26    1.06
   4   3   3   17.74    0.98
   5  -3   3   11.09    0.76
  -5  -3  -3    9.20    0.69
  -5   3  -3    9.69    0.80
  -5   3  -3    8.34    0.76
   5   3   3    9.83    0.79
  -5   3  -3    9.64    0.67
   5   3   3   10.09    0.68
   5   3   3   11.00    0.80
  -6  -3  -3   12.65    0.90
   6  -3   3   13.57    0.96
   6   3   3   13.82    1.02
   6   3   3   11.83    0.86
  -6   3  -3   12.43    0.84
   7  -3   3    1.82    0.35
  -7  -3  -3    1.93    0.32
   7   3   3    1.48    0.33
  -7   3  -3    1.54    0.29
  -8  -3  -3    3.50    0.46
   8  -3   3    3.33    0.50
   8   3   3    3.05    0.50
  -9  -3  -3    0.34    0.24
   9  -3   3    0.77    0.31
   9   3   3    0.00    0.06
 -10  -3  -3    1.10    0.37
  10  -3   3    0.86    0.34
  10   3   3    0.43    0.26
 -10   3  -3    0.57    0.22
 -11  -3  -3    0.87    0.35
  11  -3   3    1.07    0.41
 -11   3  -3    1.55    0.35
  11   3   3    0.91    0.39
  12  -3   3    0.40    0.30
 -12  -3  -3    0.21    0.24
 -12   3  -3    0.15    0.21
  12   3   3    0.38    0.31
  13  -3   3    0.10    0.28
 -13  -3  -3   -0.09    0.21
 -13   3  -3   -0.01    0.19
  13   3   3    0.02    0.33
 -14  -4   3    0.27    0.28
  14  -4  -3    0.36    0.37
 -14   4   3    0.23    0.21
  14   4  -3    0.43    0.38
 -13  -4   3    0.29    0.27
  13  -4  -3    0.22    0.34
 -13   4   3    0.60    0.25
  13   4  -3    0.29    0.35
 -12  -4   3   -0.08    0.17
  12  -4  -3    0.70    0.33
 -12   4   3    0.41    0.20
  12   4  -3    0.26    0.28
 -11  -4   3    0.29    0.23
  11  -4  -3   -0.02    0.18
  11   4  -3    0.70    0.35
 -11   4   3    0.76    0.23
 -10  -4   3    0.48    0.22
  10  -4  -3    0.19    0.21
 -10   4   3    0.23    0.15
  10   4  -3    0.82    0.31
  -9  -4   3    1.41    0.31
   9  -4  -3    0.32    0.20
  -9   4   3    0.81    0.21
   9   4  -3    1.42    0.38
   9   4  -3    1.24    0.28
  -8   4   3    2.46    0.42
   8   4  -3    4.40    0.59
  -8   4   3    4.50    0.39
   8   4  -3    4.15    0.43
  -6  -4   3    1.47    0.20
   6  -4  -3    1.91    0.22
   6   4  -3    1.23    0.24
   6   4  -3    1.67    0.31
  -6   4   3    1.77    0.27
  -6   4   3    1.56    0.23
  -6   4   3    2.02    0.31
   6   4  -3    2.43    0.34
   6   4  -3    1.66    0.28
   4   4  -3   17.15    1.18
   4   4  -3   15.35    1.02
  -4   4   3   16.68    0.94
   4   4  -3   18.66    1.20
  -4   4   3   17.82    1.16
  -4   4   3   17.94    1.18
  -3   4   3    3.67    0.25
   3   4  -3    3.96    0.33
   3   4  -3    3.65    0.33
  -3   4   3    3.44    0.30
   3   4  -3    3.30    0.30
  -3   4   3    3.24    0.28
  -2   4   3    2.24    0.19
  -2   4   3    1.84    0.17
   2   4  -3    2.48    0.29
   2   4  -3    2.11    0.21
  -2   4   3    1.99    0.17
   2   4  -3    1.80    0.19
   1   4  -3    3.15    0.32
  -1   4   3    2.76    0.20
   1   4  -3    2.36    0.23
  -1   4   3    2.48    0.22
   1   4  -3    3.26    0.26
  -1   4   3    3.40    0.24
   0   4  -3    5.23    0.40
   0   4  -3    5.15    0.40
   0   4   3    6.23    0.41
   0   4   3    5.61    0.33
   0   4   3    4.91    0.39
   0   4  -3    5.63    0.42
  -1   4  -3    3.71    0.31
   1   4   3    3.17    0.29
  -1   4  -3    3.47    0.30
  -1   4  -3    3.28    0.30
   1   4   3    3.73    0.30
   1   4   3    3.67    0.25
  -2   4  -3    0.32    0.10
   2   4   3    0.40    0.11
  -2   4  -3    0.63    0.13
   2   4   3    0.46    0.13
  -2   4  -3    0.60    0.15
   2   4   3    0.77    0.14
  -4  -4  -3    1.40    0.18
   4  -4   3    1.41    0.22
   4   4   3    2.00    0.28
   4   4   3    1.62    0.27
   4   4   3    1.86    0.28
  -4   4  -3    2.11    0.30
  -4   4  -3    1.67    0.27
  -4   4  -3    2.07    0.29
   5   4   3   10.67    0.71
  -5   4  -3    9.77    0.69
   5   4   3    8.95    0.78
  -5   4  -3   10.24    0.81
   5   4   3    9.75    0.79
  -5   4  -3   10.26    0.83
  -6  -4  -3    0.03    0.04
   6  -4   3    0.01    0.04
  -6   4  -3    0.49    0.17
   6   4   3    0.28    0.15
  -6   4  -3    0.22    0.13
   6   4   3    0.24    0.16
  -7   4  -3    1.06    0.25
   7   4   3    0.97    0.29
  -8  -4  -3    2.78    0.48
   8  -4   3    2.03    0.43
  -8   4  -3    2.21    0.39
   8   4   3    2.53    0.47
  -9  -4  -3    0.47    0.28
   9  -4   3    0.33    0.25
   9   4   3    0.05    0.18
  -9   4  -3    0.34    0.21
  10  -4   3    0.14    0.20
 -10  -4  -3    0.55    0.27
 -10   4  -3    0.21    0.14
  10   4   3    0.19    0.29
  11  -4   3    0.40    0.30
 -11  -4  -3    0.38    0.27
 -11   4  -3    0.43    0.23
  11   4   3    0.45    0.34
 -12  -4  -3    0.77    0.35
  12  -4   3    0.66    0.37
 -12   4  -3    1.21    0.36
  12   4   3    0.78    0.42
  12  -5  -3    0.01    0.32
 -12  -5   3    0.18    0.24
 -12   5   3   -0.01    0.15
  12   5  -3    0.00    0.27
  11  -5  -3    0.89    0.39
 -11  -5   3    1.17    0.36
 -11   5   3    0.87    0.25
  11   5  -3    0.67    0.34
  10  -5  -3    0.02    0.26
 -10   5   3    0.19    0.14
  10   5  -3    0.44    0.28
   9  -5  -3    0.09    0.22
  -9  -5   3    0.28    0.20
   9   5  -3    0.16    0.18
  -9   5   3   -0.05    0.11
   9   5  -3    0.19    0.21
   8  -5  -3    0.42    0.24
  -8  -5   3    0.95    0.27
   8   5  -3    1.08    0.27
  -8   5   3    1.47    0.27
   8   5  -3    1.44    0.36
   7  -5  -3   -0.04    0.07
  -7  -5   3    0.00    0.05
   7   5  -3    0.06    0.03
   7   5  -3    0.06    0.08
  -7   5   3   -0.01    0.09
  -7   5   3    0.02    0.09
  -7   5   3    0.03    0.03
   7   5  -3    0.10    0.16
   7   5  -3    0.17    0.13
  -6   5   3    3.18    0.35
   6   5  -3    2.42    0.41
   6   5  -3    3.00    0.40
   5   5  -3    0.90    0.25
  -5   5   3    0.63    0.15
  -5   5   3    0.70    0.16
   5   5  -3    0.65    0.18
   5   5  -3    0.42    0.12
  -4   5   3    5.72    0.37
   4   5  -3    5.20    0.44
  -4   5   3    5.14    0.42
   4   5  -3    4.93    0.45
   4   5  -3    5.44    0.46
   3   5  -3    1.18    0.23
   3   5  -3    1.11    0.18
  -3   5   3    1.53    0.18
  -3   5   3    1.38    0.15
   2   5  -3    1.37    0.16
  -2   5   3    1.80    0.16
   2   5  -3    2.22    0.29
  -2   5   3    1.53    0.15
  -1   5   3    0.27    0.08
  -1   5   3    0.25    0.06
   1   5  -3    0.08    0.13
   1   5  -3    0.17    0.07
   0   5   3    9.83    0.51
   0   5  -3   10.58    0.61
   0   5   3    8.66    0.62
   0   5  -3    7.86    0.62
  -1   5  -3    0.96    0.16
   1   5   3    1.00    0.14
   1   5   3    0.90    0.15
  -1   5  -3    1.43    0.24
  -2   5  -3    0.49    0.12
  -2   5  -3    0.76    0.18
   2   5   3    0.65    0.14
   2   5   3    0.60    0.13
   3   5   3    1.95    0.27
  -3   5  -3    2.55    0.32
  -3   5  -3    2.09    0.29
   3   5   3    2.29    0.28
  -4   5  -3    2.54    0.33
  -4   5  -3    2.35    0.28
   4   5   3    2.38    0.32
  -5   5  -3    2.11    0.32
  -5   5  -3    1.83    0.30
   5   5   3    1.52    0.30
   5   5   3    1.76    0.29
   6  -5   3   -0.02    0.05
  -6  -5  -3   -0.01    0.05
  -6   5  -3    0.01    0.04
   6   5   3   -0.04    0.13
   6   5   3   -0.04    0.04
  -6   5  -3   -0.01    0.11
   7  -5   3    3.91    0.59
  -7  -5  -3    4.41    0.58
   7   5   3    2.86    0.48
  -7   5  -3    3.12    0.43
  -8  -5  -3    1.61    0.38
   8  -5   3    0.99    0.34
   8   5   3    0.82    0.31
  -8   5  -3    0.63    0.20
  -9  -5  -3   -0.12    0.19
   9  -5   3    0.47    0.29
   9   5   3    0.34    0.24
  -9   5  -3    0.14    0.15
 -10  -5  -3    0.05    0.22
  10  -5   3    0.16    0.28
 -10   5  -3    0.17    0.19
  10   5   3   -0.07    0.21
 -11  -5  -3    0.79    0.38
  11  -5   3    0.69    0.37
  11   5   3    0.15    0.26
 -11   5  -3    0.71    0.26
  10   6  -3    0.20    0.32
 -10   6   3    0.27    0.18
  -9   6   3    0.14    0.14
   9   6  -3   -0.09    0.24
   9   6  -3    0.09    0.19
   8   6  -3    0.71    0.22
  -8   6   3    0.46    0.19
   8   6  -3    0.61    0.33
   7   6  -3    0.31    0.26
   7   6  -3    0.50    0.19
  -7   6   3    0.55    0.18
   7   6  -3    0.48    0.17
  -7   6   3    0.61    0.18
   6   6  -3    0.23    0.19
   6   6  -3   -0.02    0.03
  -6   6   3    0.02    0.03
   6   6  -3    0.30    0.14
  -6   6   3    0.09    0.12
   6   6  -3    0.17    0.11
  -6   6   3    0.06    0.08
  -6   6   3    0.18    0.12
   5   6  -3    0.69    0.25
  -5   6   3    0.96    0.18
   5   6  -3    0.78    0.19
  -5   6   3    0.74    0.17
   5   6  -3    0.65    0.16
  -5   6   3    0.92    0.18
  -4   6   3    2.96    0.29
  -4   6   3    3.44    0.32
   4   6  -3    3.56    0.34
   4   6  -3    3.19    0.32
  -3   6   3    0.97    0.17
  -3   6   3    0.50    0.10
   3   6  -3    0.43    0.11
   1   6   3    0.68    0.13
  -1   6  -3    0.73    0.13
  -2   6  -3    1.09    0.18
   2   6   3    0.76    0.15
   3   6   3    1.55    0.24
  -3   6  -3    1.42    0.24
  -3   6  -3    1.76    0.26
   3   6   3    1.86    0.27
  -4   6  -3    1.21    0.24
   4   6   3    0.81    0.19
   4   6   3    1.01    0.23
  -5   6  -3    0.01    0.04
  -5   6  -3    0.14    0.09
   5   6   3    0.01    0.04
   5   6   3    0.09    0.09
  -5   6  -3    0.00    0.13
   5   6   3    0.13    0.16
  -6   6  -3    0.01    0.04
   6   6   3    0.02    0.04
  -6   6  -3    0.07    0.13
   6   6   3   -0.17    0.17
   7   6   3    0.53    0.27
  -7   6  -3    0.98    0.27
   8   6   3    0.38    0.27
  -8   6  -3    0.51    0.21
  -9   6  -3    0.21    0.17
  -7   7   3    0.00    0.04
   7   7  -3   -0.05    0.05
  -7   7   3   -0.06    0.09
  -7   7   3    0.24    0.18
   7   7  -3   -0.05    0.14
   7   7  -3    0.04    0.26
  -6   7   3    0.17    0.16
  -6   7   3    0.52    0.16
   6   7  -3    0.02    0.04
   6   7  -3    0.46    0.19
   6   7  -3    0.51    0.15
   5   7  -3    0.39    0.13
   5   7  -3    0.39    0.15
  -5   7   3    0.52    0.17
  -5   7   3    0.40    0.13
   4   7  -3    1.06    0.19
  -4   7   3    1.54    0.25
   4   7  -3    1.00    0.20
  -4   7   3    0.97    0.17
  -3   7   3    0.31    0.09
   3   7  -3    0.59    0.16
   3   7  -3    0.42    0.13
  -1   7   3    0.83    0.13
   1   7  -3    0.98    0.15
   0   7  -3    0.55    0.11
   1   7   3    0.22    0.08
   1   7   3   -0.01    0.02
  -1   7  -3    0.20    0.08
  -1   7  -3    0.01    0.03
  -1   7  -3    0.01    0.03
  -2   7  -3   -0.03    0.03
  -2   7  -3    0.07    0.06
   2   7   3   -0.01    0.03
   2   7   3   -0.01    0.06
   3   7   3    0.35    0.12
  -3   7  -3    0.52    0.14
   4   7   3    0.00    0.03
  -4   7  -3   -0.02    0.08
   4   7   3   -0.03    0.07
  -4   7  -3    0.00    0.04
   5   7   3    0.00    0.04
  -5   7  -3    0.03    0.04
  -5   7  -3   -0.02    0.10
   5   7   3   -0.04    0.09
 -16   0   4    0.17    0.28
  16   0  -4    0.36    0.47
 -15   0   4    0.21    0.29
  15   0  -4   -0.17    0.27
  14   0  -4    0.08    0.28
 -14   0   4    0.30    0.25
  13   0  -4    3.97    0.77
 -13   0   4    3.54    0.59
  11   0  -4    2.52    0.58
 -11   0   4    2.77    0.47
  10   0  -4    5.89    0.80
   9   0  -4    0.23    0.17
  -9   0   4    0.76    0.24
   9   0  -4   -0.03    0.05
   8   0  -4    0.00    0.05
  -8   0   4    0.00    0.02
  -8   0   4    0.10    0.12
   8   0  -4   -0.15    0.11
   8   0  -4   -0.01    0.08
   8   0  -4    0.17    0.12
  -8   0   4    0.01    0.10
  -8   0   4    0.05    0.10
   7   0  -4    1.90    0.39
  -7   0   4    2.98    0.39
  -7   0   4    1.88    0.30
  -7   0   4    2.25    0.33
   7   0  -4    2.06    0.30
   7   0  -4    2.14    0.35
   6   0  -4   96.52    5.17
  -6   0   4   86.22    4.86
  -6   0   4   93.92    5.14
   6   0  -4   86.24    4.97
  -6   0   4   88.19    5.07
   6   0  -4   97.63    5.08
  -5   0   4   10.43    0.76
  -5   0   4   11.36    0.82
   5   0  -4   11.29    0.83
  -5   0   4   12.47    0.75
   5   0  -4   10.09    0.75
   5   0  -4   12.83    0.85
   4   0  -4   23.09    1.46
  -4   0   4   22.26    1.39
  -4   0   4   22.72    1.45
   4   0  -4   24.73    1.43
   4   0  -4   24.90    1.41
  -4   0   4   22.89    1.33
  -3   0   4   46.51    2.65
   3   0  -4   50.70    2.78
  -3   0   4   48.12    2.83
   3   0  -4   49.79    2.74
   3   0  -4   53.97    2.85
  -3   0   4   48.35    2.78
  -2   0   4   57.37    3.19
   2   0  -4   56.91    3.20
  -2   0   4   53.58    3.24
   2   0  -4   61.28    3.14
  -2   0   4   57.60    3.06
   2   0  -4   59.46    3.25
  -1   0   4    0.25    0.08
   1   0  -4    0.34    0.11
   1   0  -4    0.29    0.12
  -1   0   4    0.43    0.10
   1   0  -4    0.23    0.08
  -1   0   4    0.07    0.08
   0   0  -4  427.16   21.82
   0   0   4  442.24   20.89
   0   0  -4  389.33   21.84
   0   0   4  415.25   21.86
   0   0   4  377.33   21.80
   0   0  -4  392.98   20.93
  -1   0  -4   30.57    1.79
  -1   0  -4   30.61    1.86
  -1   0  -4   36.42    1.86
   1   0   4   30.94    1.88
   1   0   4   28.67    1.83
   1   0   4   34.01    1.76
   2   0   4  270.51   14.70
  -2   0  -4  266.28   14.66
   2   0   4  272.21   14.04
  -2   0  -4  288.49   14.08
   2   0   4  267.26   14.66
  -2   0  -4  269.72   14.68
   3   0   4   91.50    4.64
  -3   0  -4   82.72    4.83
  -3   0  -4   84.30    4.66
   3   0   4   93.67    4.89
   3   0   4   83.84    4.85
  -3   0  -4   87.97    4.84
   4   0   4    6.62    0.55
  -4   0  -4    6.35    0.54
  -4   0  -4    6.82    0.55
  -4   0  -4    6.86    0.54
   4   0   4    5.72    0.51
   4   0   4    6.70    0.57
   5   0   4    6.39    0.56
   5   0   4    5.46    0.54
  -5   0  -4    5.17    0.50
  -5   0  -4    5.69    0.51
   5   0   4    5.84    0.51
  -5   0  -4    6.06    0.52
   6   0   4    8.99    0.75
  -6   0  -4    8.46    0.72
  -6   0  -4   10.14    0.77
   6   0   4   10.06    0.80
  -7   0  -4    5.58    0.55
  -8   0  -4    4.00    0.56
   8   0   4    3.99    0.58
   9   0   4   -0.07    0.07
  -9   0  -4    0.31    0.19
   9   0   4    0.69    0.25
 -11   0  -4    0.61    0.31
  11   0   4    1.10    0.41
  12   0   4   -0.05    0.27
 -12   0  -4   -0.12    0.23
  13   0   4   -0.25    0.24
 -13   0  -4    0.24    0.29
 -14   0  -4    0.90    0.46
  14   0   4    0.50    0.40
 -16  -1   4   -0.09    0.27
  16  -1  -4    0.54    0.43
  16   1  -4    0.28    0.47
 -16   1   4   -0.01    0.22
 -16   1   4    0.04    0.30
  16   1  -4   -0.02    0.34
  15  -1  -4    0.84    0.45
 -15  -1   4    0.22    0.30
  15   1  -4    0.43    0.40
 -15   1   4    0.43    0.26
 -15   1   4    0.60    0.35
  15   1  -4    0.32    0.44
  14  -1  -4    1.90    0.55
 -14  -1   4    1.77    0.46
 -14   1   4    1.36    0.44
  14   1  -4    1.37    0.52
  14   1  -4    0.41    0.21
  13  -1  -4    0.96    0.39
 -13  -1   4    1.28    0.40
 -13   1   4    0.91    0.34
  13   1  -4    2.30    0.65
 -12  -1   4    1.90    0.41
  12  -1  -4    2.16    0.58
 -12   1   4    3.29    0.51
  12   1  -4    1.23    0.41
 -11  -1   4   17.54    1.33
  11  -1  -4   19.78    1.50
  11   1  -4   17.57    1.43
 -11   1   4   20.23    1.32
  10  -1  -4    6.89    0.90
 -10  -1   4    6.05    0.60
 -10   1   4    5.80    0.56
  10   1  -4    6.70    0.83
  -9  -1   4   14.03    1.07
  -9  -1   4   15.08    1.01
   9  -1  -4   14.02    1.11
   9  -1  -4   13.65    1.00
  -9   1   4   12.08    0.93
   9   1  -4   13.22    1.08
  -8  -1   4    4.34    0.52
  -8  -1   4    3.56    0.49
   8  -1  -4    5.39    0.47
  -8  -1   4    4.78    0.46
   8  -1  -4    3.78    0.58
   8   1  -4    4.42    0.58
   8   1  -4    4.95    0.60
  -8   1   4    4.19    0.42
  -8   1   4    4.93    0.54
  -7  -1   4    1.53    0.29
   7  -1  -4    1.07    0.29
  -7  -1   4    1.51    0.27
  -7  -1   4    1.23    0.24
   7  -1  -4    0.84    0.19
   7  -1  -4    1.48    0.30
  -7   1   4    1.13    0.23
   7   1  -4    1.31    0.30
   7   1  -4    0.84    0.20
   7   1  -4    1.59    0.29
  -7   1   4    1.13    0.26
  -7   1   4    1.25    0.24
   7   1  -4    1.02    0.20
   7   1  -4    1.35    0.29
  -7   1   4    1.47    0.27
   7   1  -4    1.79    0.30
   6  -1  -4   31.43    1.88
   6  -1  -4   35.84    2.00
  -6  -1   4   32.37    1.84
  -6  -1   4   35.01    1.91
  -6  -1   4   28.21    1.92
   6  -1  -4   28.31    1.91
   6   1  -4   34.25    1.94
  -6   1   4   31.74    1.81
  -6   1   4   28.65    2.08
  -6   1   4   34.32    1.98
   6   1  -4   32.15    2.10
  -6   1   4   31.72    2.10
  -6   1   4   30.58    1.89
   6   1  -4   34.02    1.99
   6   1  -4   29.76    1.88
   6   1  -4   30.35    2.10
   6   1  -4   33.17    1.98
   5  -1  -4  125.82    6.29
  -5  -1   4  121.74    6.20
  -5  -1   4   99.19    6.21
   5  -1  -4  102.57    6.16
   5   1  -4  111.32    6.55
  -5   1   4  105.12    6.95
  -5   1   4  108.01    6.24
   5   1  -4  109.77    6.18
   5   1  -4  107.84    6.96
  -5   1   4  114.01    6.96
  -5   1   4  116.84    5.91
   5   1  -4  124.42    6.98
   5   1  -4  118.90    6.03
   5   1  -4  104.17    6.24
  -5   1   4  123.41    6.20
   4  -1  -4  182.64    9.63
  -4  -1   4  185.07    9.62
   4  -1  -4  188.48    9.57
  -4  -1   4  193.86    9.58
  -4   1   4  170.99   10.80
  -4   1   4  163.84    9.56
   4   1  -4  162.83    9.62
   4   1  -4  177.50    9.25
  -4   1   4  177.82   10.80
   4   1  -4  172.56    9.57
  -4   1   4  180.37    9.15
   4   1  -4  175.34   10.80
   4   1  -4  155.14   10.17
   4   1  -4  182.81   10.81
  -4   1   4  183.35    9.64
   3  -1  -4   11.00    0.73
  -3  -1   4   11.48    0.73
   3  -1  -4   10.50    0.76
  -3  -1   4   10.79    0.77
   3   1  -4   11.04    0.78
  -3   1   4   12.16    0.80
   3   1  -4   12.81    0.80
  -3   1   4   11.06    0.73
  -3   1   4   11.66    0.79
  -3   1   4   11.18    0.80
   3   1  -4   12.24    0.75
   3   1  -4   11.42    0.80
   3   1  -4   10.12    0.80
  -2  -1   4    2.04    0.20
  -2  -1   4    1.48    0.22
   2  -1  -4    1.38    0.18
   2  -1  -4    1.68    0.24
   2   1  -4    1.76    0.24
   2   1  -4    1.93    0.20
  -2   1   4    1.68    0.23
   2   1  -4    1.65    0.20
  -2   1   4    1.64    0.20
   2   1  -4    1.87    0.24
  -2   1   4    1.69    0.19
  -2   1   4    1.65    0.21
   1  -1  -4   57.61    3.31
  -1  -1   4   59.41    3.32
  -1  -1   4   60.48    3.28
   1  -1  -4   61.76    3.28
  -1   1   4   66.29    3.35
  -1   1   4   64.07    3.29
   1   1  -4   56.70    3.68
   1   1  -4   54.80    3.68
   1   1  -4   53.67    3.32
  -1   1   4   60.25    3.69
   1   1  -4   58.44    3.29
   0  -1  -4  158.13    8.79
   0  -1   4  162.91    8.77
   0  -1  -4  155.72    8.76
   0  -1   4  160.13    8.81
   0   1  -4  146.03    9.88
   0   1   4  160.83    8.77
   0   1  -4  163.71    8.78
   0   1   4  172.69    8.82
   0   1  -4  174.34    9.91
   0   1  -4  165.13    8.82
   0   1   4  167.85    9.91
   0   1   4  161.64    9.90
   1  -1   4   71.05    3.74
  -1  -1  -4   64.87    3.69
  -1  -1  -4   73.55    3.73
   1   1   4   65.83    3.74
  -1   1  -4   69.03    3.71
  -1   1  -4   65.33    3.73
  -1   1  -4   64.69    3.56
   1   1   4   68.42    3.54
   1   1   4   63.54    4.14
   1   1   4   64.72    3.70
  -1   1  -4   66.30    4.17
  -1   1  -4   67.68    4.15
   1   1   4   63.68    4.15
   2  -1   4   99.08    4.86
  -2  -1  -4   86.18    4.83
   2  -1   4   80.50    4.86
  -2  -1  -4   88.89    4.84
  -2   1  -4   86.48    4.65
   2   1   4   87.01    5.44
  -2   1  -4   87.42    4.84
   2   1   4   79.85    5.41
  -2   1  -4   90.36    4.88
  -2   1  -4   84.09    5.44
   2   1   4   97.98    4.90
  -2   1  -4   85.92    5.43
   2   1   4   88.48    4.84
   3  -1   4   46.91    2.77
  -3  -1  -4   47.60    2.73
  -3  -1  -4   46.12    2.73
   3  -1   4   48.08    2.75
  -3   1  -4   47.95    2.75
   3   1   4   52.20    3.06
  -3   1  -4   49.59    3.06
   3   1   4   48.97    2.75
  -3   1  -4   44.41    3.03
   3   1   4   50.68    2.79
  -3   1  -4   47.32    2.64
  -3   1  -4   52.26    2.77
   3   1   4   44.07    3.04
   3   1   4   44.29    2.61
   4  -1   4    4.18    0.42
   4  -1   4    4.58    0.41
  -4  -1  -4    3.63    0.38
  -4  -1  -4    4.91    0.43
   4  -1   4    3.54    0.39
  -4  -1  -4    4.06    0.39
   4   1   4    4.51    0.42
  -4   1  -4    3.98    0.40
  -4   1  -4    3.82    0.40
   4   1   4    4.55    0.43
  -4   1  -4    3.42    0.39
  -4   1  -4    4.35    0.43
   4   1   4    4.50    0.43
  -4   1  -4    4.38    0.40
   4   1   4    4.27    0.43
   4   1   4    4.91    0.41
   5  -1   4    4.94    0.46
   5  -1   4    4.21    0.45
   5  -1   4    4.27    0.45
  -5  -1  -4    4.18    0.43
  -5  -1  -4    4.34    0.44
  -5  -1  -4    4.95    0.57
  -5   1  -4    5.09    0.48
  -5   1  -4    4.39    0.44
   5   1   4    4.42    0.46
   5   1   4    3.93    0.50
  -5   1  -4    4.48    0.43
   5   1   4    5.83    0.51
  -5   1  -4    4.28    0.44
   5   1   4    5.05    0.46
   6  -1   4    8.03    0.68
   6  -1   4    8.03    0.69
  -6  -1  -4    6.78    0.63
  -6  -1  -4    7.15    0.64
  -6   1  -4    7.74    0.67
   6   1   4    8.20    0.66
  -6   1  -4    8.09    0.64
   6   1   4    8.19    0.71
  -7  -1  -4    0.83    0.23
  -7  -1  -4    0.70    0.24
   7  -1   4    0.57    0.22
   7  -1   4    0.88    0.27
  -7   1  -4    0.86    0.25
   7   1   4    1.03    0.26
  -8  -1  -4    1.97    0.42
   8  -1   4    1.76    0.38
   8   1   4    1.18    0.32
  -8   1  -4    2.58    0.44
   9  -1   4    0.00    0.14
  -9  -1  -4    0.04    0.13
   9   1   4   -0.09    0.11
   9   1   4   -0.01    0.06
  -9   1  -4    0.00    0.04
  -9   1  -4    0.12    0.17
 -10  -1  -4    1.89    0.45
  10  -1   4    0.86    0.35
 -10   1  -4    1.86    0.43
  10   1   4    1.16    0.38
  11  -1   4    0.91    0.36
 -11  -1  -4    1.16    0.36
 -11   1  -4    1.04    0.38
  11   1   4    1.32    0.45
  12  -1   4    1.24    0.44
 -12  -1  -4    1.05    0.38
 -12   1  -4    0.90    0.33
  12   1   4    1.08    0.46
 -12   1  -4    1.03    0.40
  12   1   4    0.31    0.37
 -13  -1  -4    1.19    0.44
  13  -1   4    3.28    0.74
  13   1   4    2.82    0.70
  13   1   4    2.17    0.59
 -13   1  -4    2.73    0.51
 -13   1  -4    2.35    0.58
 -14  -1  -4    0.82    0.41
  14  -1   4    0.74    0.48
  14   1   4    0.30    0.43
 -14   1  -4    1.02    0.46
  14   1   4    1.43    0.55
 -16  -2   4   -0.02    0.26
  16  -2  -4    0.78    0.49
 -16   2   4    0.38    0.32
  16   2  -4   -0.16    0.35
 -15  -2   4    0.82    0.42
  15  -2  -4    0.03    0.34
  15   2  -4    0.24    0.41
 -15   2   4    0.23    0.23
 -14  -2   4    1.32    0.43
  14  -2  -4    1.75    0.53
  14   2  -4    1.79    0.54
 -14   2   4    2.32    0.45
 -13  -2   4    0.34    0.29
  13  -2  -4    0.52    0.35
 -13   2   4    0.06    0.17
  13   2  -4    0.18    0.29
  12  -2  -4    0.46    0.31
 -12  -2   4    0.24    0.19
  12   2  -4   -0.03    0.09
  11  -2  -4    2.37    0.55
 -11  -2   4    2.13    0.42
  11   2  -4    2.95    0.55
   9  -2  -4    1.58    0.31
  -9  -2   4    1.76    0.35
  -9   2   4    2.92    0.40
   9   2  -4    2.72    0.51
   7  -2  -4   10.50    0.74
   7   2  -4    9.93    0.77
  -7   2   4   10.27    0.82
  -7   2   4    9.54    0.69
  -7   2   4   11.00    0.82
   7   2  -4    8.50    0.78
   7   2  -4   10.57    0.83
   7   2  -4    9.90    0.80
   6  -2  -4    1.26    0.22
  -6  -2   4    1.50    0.25
   6   2  -4    1.52    0.27
  -6   2   4    1.67    0.26
  -6   2   4    1.80    0.24
  -6   2   4    1.45    0.24
   6   2  -4    1.62    0.26
  -6   2   4    1.41    0.24
  -6   2   4    1.48    0.28
   6   2  -4    1.73    0.33
  -6   2   4    1.47    0.26
   6   2  -4    1.45    0.25
   6   2  -4    1.38    0.23
   6   2  -4    0.96    0.24
   6   2  -4    1.09    0.26
  -5  -2   4   30.75    1.83
   5  -2  -4   28.88    1.77
   5   2  -4   30.12    1.72
  -5   2   4   30.56    1.99
   5   2  -4   31.96    2.02
   5   2  -4   29.93    1.99
   5   2  -4   31.05    1.90
  -5   2   4   31.87    1.81
  -5   2   4   29.90    1.60
  -5   2   4   30.51    2.01
  -5   2   4   32.25    1.88
   5   2  -4   28.33    1.80
  -5   2   4   30.91    1.70
   5   2  -4   30.54    1.81
   5   2  -4   29.28    1.86
  -4  -2   4    2.39    0.31
   4  -2  -4    2.34    0.23
  -4   2   4    2.30    0.26
   4   2  -4    2.11    0.27
  -4   2   4    2.37    0.33
   4   2  -4    2.55    0.37
   4   2  -4    2.41    0.28
  -4   2   4    3.03    0.24
  -4   2   4    2.65    0.27
   4   2  -4    2.25    0.33
   4   2  -4    2.42    0.27
  -4   2   4    2.69    0.27
  -3  -2   4   12.88    0.84
   3  -2  -4   12.87    0.80
   3   2  -4   13.84    0.83
   3   2  -4   12.84    0.92
  -3   2   4   12.70    0.72
  -3   2   4   12.30    0.82
  -3   2   4   13.70    0.90
   3   2  -4   12.50    0.90
  -3   2   4   12.51    0.87
  -3   2   4   12.07    0.89
   3   2  -4   13.88    0.89
   3   2  -4   13.40    0.83
   2  -2  -4   20.27    1.20
  -2  -2   4   20.62    1.25
  -2   2   4   20.30    1.34
  -2   2   4   21.12    1.08
   2   2  -4   20.48    1.22
   2   2  -4   22.04    1.18
  -2   2   4   19.75    1.26
  -2   2   4   20.54    1.22
   2   2  -4   20.22    1.35
   2   2  -4   20.62    1.27
  -2   2   4   20.21    1.34
   2   2  -4   21.01    1.38
   1  -2  -4    1.99    0.19
  -1  -2   4    1.69    0.23
   1   2  -4    1.94    0.20
  -1   2   4    2.35    0.28
   1   2  -4    1.87    0.21
  -1   2   4    2.33    0.21
   1   2  -4    2.25    0.30
   1   2  -4    1.48    0.23
  -1   2   4    1.88    0.21
  -1   2   4    1.87    0.17
   1   2  -4    1.84    0.22
  -1   2   4    1.94    0.20
   0  -2   4    9.82    0.67
   0  -2  -4    8.98    0.62
   0   2  -4   10.23    0.72
   0   2  -4    9.44    0.69
   0   2   4   10.11    0.69
   0   2   4    9.59    0.56
   0   2  -4    9.91    0.64
   0   2  -4    9.15    0.67
   0   2   4   10.63    0.70
   0   2  -4   10.22    0.65
   0   2   4    9.83    0.64
   1  -2   4   76.88    4.11
  -1  -2  -4   71.78    4.04
  -1   2  -4   73.05    4.10
   1   2   4   71.35    4.06
   1   2   4   75.11    4.56
  -1   2  -4   75.89    3.72
  -1   2  -4   67.87    4.55
   1   2   4   76.22    4.57
  -1   2  -4   74.77    4.08
   1   2   4   74.28    4.11
  -1   2  -4   67.91    4.56
   1   2   4   78.75    3.64
  -2  -2  -4   53.05    2.85
   2  -2   4   44.85    2.87
   2   2   4   47.22    2.55
   2   2   4   56.30    3.21
  -2   2  -4   51.73    2.62
  -2   2  -4   50.40    3.19
  -2   2  -4   51.96    2.88
   2   2   4   46.63    3.20
  -2   2  -4   49.82    3.20
  -2   2  -4   51.75    2.91
   2   2   4   53.70    2.88
   2   2   4   50.46    2.90
  -3  -2  -4    5.97    0.48
   3  -2   4    5.42    0.50
  -3   2  -4    5.73    0.51
  -3   2  -4    5.92    0.52
   3   2   4    6.50    0.53
   3   2   4    6.43    0.51
  -3   2  -4    6.79    0.55
   3   2   4    6.03    0.53
   3   2   4    5.47    0.52
  -3   2  -4    6.01    0.48
   3   2   4    6.19    0.44
   3   2   4    6.44    0.49
  -3   2  -4    6.98    0.52
  -3   2  -4    6.35    0.47
  -4  -2  -4   35.51    2.04
   4  -2   4   31.59    2.06
  -4   2  -4   35.52    2.28
  -4   2  -4   36.00    2.27
  -4   2  -4   35.10    1.96
   4   2   4   32.52    2.07
  -4   2  -4   36.33    2.13
  -4   2  -4   36.87    2.08
  -4   2  -4   34.45    1.86
   4   2   4   30.76    2.25
   4   2   4   34.94    2.27
   4   2   4   32.76    1.85
  -6  -2  -4    1.53    0.28
   6  -2   4    1.45    0.30
  -6   2  -4    1.82    0.33
   6   2   4    1.47    0.31
  -9  -2  -4    1.39    0.37
   9  -2   4    1.12    0.33
  -9   2  -4    0.89    0.31
  10  -2   4    0.19    0.22
 -10  -2  -4    0.33    0.23
  10   2   4    0.04    0.06
 -10   2  -4    0.02    0.05
  11  -2   4    0.12    0.26
 -11  -2  -4    0.41    0.28
  11   2   4    0.14    0.30
 -11   2  -4    0.83    0.28
  12  -2   4    1.90    0.55
 -12  -2  -4    3.74    0.67
  12   2   4    2.00    0.55
 -12   2  -4    3.48    0.56
  13  -2   4   -0.13    0.22
 -13  -2  -4    0.09    0.22
 -13   2  -4    0.16    0.21
  13   2   4   -0.33    0.29
 -15  -3   4    0.52    0.35
  15  -3  -4    0.70    0.43
  15   3  -4    0.72    0.47
 -15   3   4    0.35    0.24
  14  -3  -4   -0.07    0.36
 -14  -3   4    0.32    0.27
  14   3  -4   -0.13    0.34
 -14   3   4    0.10    0.18
 -13  -3   4   -0.02    0.20
  13  -3  -4    0.12    0.31
 -13   3   4    0.14    0.18
  13   3  -4   -0.21    0.21
 -12  -3   4    5.71    0.78
  12  -3  -4    6.92    1.02
  12   3  -4    6.61    0.93
 -12   3   4    6.96    0.60
  11  -3  -4    1.28    0.43
 -11  -3   4    0.55    0.24
  10  -3  -4    0.43    0.19
 -10  -3   4    0.55    0.25
 -10  -3   4    0.40    0.19
  10  -3  -4    0.16    0.22
  -9  -3   4   13.65    0.98
   9  -3  -4   11.88    0.90
  -9   3   4   11.42    0.81
   9   3  -4   12.74    1.00
  -8  -3   4    1.76    0.31
   8  -3  -4    1.57    0.28
  -8   3   4    1.05    0.24
  -8   3   4    1.44    0.25
   8   3  -4    1.58    0.30
   8   3  -4    1.45    0.35
   8   3  -4    1.57    0.32
   7  -3  -4   15.86    1.05
  -7  -3   4   16.01    1.08
   7   3  -4   14.48    1.07
  -7   3   4   15.93    0.94
  -7   3   4   16.18    1.18
   7   3  -4   18.31    1.22
   7   3  -4   16.81    1.13
   7   3  -4   13.70    1.15
  -7   3   4   15.42    1.16
   6  -3  -4    9.72    0.70
  -6  -3   4    9.89    0.73
  -6   3   4    9.68    0.78
   6   3  -4   11.06    0.83
   6   3  -4   10.58    0.77
  -6   3   4   10.00    0.64
  -6   3   4   10.80    0.81
   6   3  -4   10.28    0.76
   6   3  -4    9.76    0.79
  -5  -3   4    9.36    0.67
   5  -3  -4    9.41    0.63
  -5   3   4    8.63    0.70
   5   3  -4    9.70    0.74
   5   3  -4    9.47    0.70
  -5   3   4    8.43    0.70
   5   3  -4    9.53    0.67
   5   3  -4    8.85    0.71
   5   3  -4    8.48    0.68
  -5   3   4   10.15    0.74
  -5   3   4    9.42    0.59
   4  -3  -4    2.09    0.21
   4   3  -4    2.76    0.29
  -4   3   4    2.94    0.36
   4   3  -4    1.95    0.26
   4   3  -4    2.26    0.25
   4   3  -4    2.72    0.35
  -4   3   4    2.23    0.22
  -4   3   4    2.27    0.26
  -4   3   4    2.24    0.25
   3  -3  -4    5.60    0.38
  -3  -3   4    5.65    0.41
   3   3  -4    5.86    0.47
   3   3  -4    5.43    0.42
   3   3  -4    5.69    0.45
  -3   3   4    5.66    0.45
  -3   3   4    5.29    0.47
  -3   3   4    5.16    0.43
  -3   3   4    5.34    0.36
   3   3  -4    5.49    0.45
   2  -3  -4    4.24    0.29
  -2  -3   4    4.13    0.32
   2   3  -4    4.15    0.36
   2   3  -4    4.37    0.34
   2   3  -4    3.87    0.35
  -2   3   4    4.42    0.39
   2   3  -4    4.10    0.36
  -2   3   4    4.35    0.35
  -2   3   4    4.24    0.34
  -2   3   4    4.09    0.29
   1  -3  -4    2.05    0.17
   1   3  -4    2.06    0.28
  -1   3   4    2.19    0.21
   1   3  -4    1.84    0.23
   1   3  -4    1.85    0.20
   1   3  -4    1.69    0.21
  -1   3   4    1.66    0.25
  -1   3   4    1.73    0.20
  -1   3   4    1.85    0.17
   0  -3  -4   14.04    0.81
   0  -3   4   14.13    0.86
   0   3  -4   13.95    0.87
   0   3   4   13.68    0.75
   0   3  -4   13.57    0.83
   0   3   4   13.41    0.94
   0   3  -4   13.23    0.93
   0   3   4   14.09    0.90
   0   3  -4   12.07    0.94
   0   3   4   14.86    0.94
  -1  -3  -4    0.93    0.14
   1  -3   4    1.00    0.16
  -1   3  -4    1.13    0.18
   1   3   4    1.16    0.16
   1   3   4    1.18    0.19
  -1   3  -4    0.97    0.20
   1   3   4    0.79    0.19
  -1   3  -4    1.03    0.19
   1   3   4    0.92    0.18
  -1   3  -4    1.11    0.18
  -2  -3  -4   21.74    1.29
   2  -3   4   21.41    1.34
   2   3   4   21.37    1.18
   2   3   4   22.72    1.47
  -2   3  -4   22.77    1.34
   2   3   4   20.87    1.46
  -2   3  -4   22.60    1.25
  -2   3  -4   20.97    1.46
  -2   3  -4   20.95    1.47
   2   3   4   23.05    1.38
  -3  -3  -4   15.90    1.03
   3  -3   4   16.68    1.09
   3   3   4   17.21    1.18
   3   3   4   15.96    0.96
   3   3   4   17.67    1.13
  -3   3  -4   17.47    1.18
  -3   3  -4   15.40    0.99
  -3   3  -4   17.15    1.10
   3   3   4   15.70    1.17
  -3   3  -4   17.67    1.20
  -4  -3  -4    5.60    0.45
   4  -3   4    6.06    0.51
  -4   3  -4    5.41    0.51
   4   3   4    5.10    0.44
   4   3   4    6.01    0.53
  -4   3  -4    4.94    0.44
  -4   3  -4    5.30    0.50
  -5  -3  -4    6.80    0.55
   5  -3   4    6.26    0.58
   5   3   4    6.28    0.52
   5   3   4    6.71    0.61
  -5   3  -4    6.97    0.62
  -5   3  -4    6.89    0.54
  -5   3  -4    6.65    0.61
  -6  -3  -4   18.01    1.25
   6  -3   4   19.69    1.32
   6   3   4   19.36    1.21
  -6   3  -4   19.53    1.19
   7  -3   4    4.02    0.55
  -7  -3  -4    4.37    0.52
  -7   3  -4    5.00    0.45
   7   3   4    4.01    0.55
  -8  -3  -4    6.54    0.66
  -9  -3  -4    1.76    0.42
   9  -3   4    1.63    0.43
 -10  -3  -4    1.73    0.44
  10  -3   4    1.36    0.43
 -10   3  -4    0.55    0.23
  10   3   4    0.65    0.30
 -11  -3  -4    0.17    0.24
  11  -3   4   -0.08    0.19
 -11   3  -4   -0.01    0.18
  11   3   4   -0.24    0.24
 -12  -3  -4   -0.04    0.23
  12  -3   4    0.04    0.22
  12   3   4    0.24    0.31
 -12   3  -4    0.11    0.22
 -13  -3  -4    0.40    0.34
  13  -3   4    0.12    0.33
  13   3   4    0.01    0.31
 -13   3  -4    0.21    0.23
  14  -4  -4    0.38    0.37
 -14  -4   4    0.53    0.29
  14   4  -4   -0.41    0.30
 -14   4   4   -0.14    0.15
  13  -4  -4    0.58    0.41
 -13  -4   4    0.69    0.32
  13   4  -4    0.21    0.34
 -13   4   4    0.72    0.25
  12  -4  -4    0.05    0.26
 -12  -4   4    0.04    0.20
 -12   4   4   -0.04    0.13
  12   4  -4   -0.20    0.22
 -11  -4   4    0.44    0.23
  11  -4  -4    0.50    0.30
 -11   4   4    0.58    0.22
  11   4  -4    0.82    0.35
  10  -4  -4    0.15    0.26
 -10  -4   4    0.56    0.24
 -10   4   4    0.40    0.18
  10   4  -4    0.92    0.33
  -9  -4   4    0.97    0.27
   9  -4  -4    0.37    0.26
   9   4  -4    0.43    0.18
   9   4  -4    0.53    0.26
  -9   4   4    0.67    0.19
  -8   4   4    0.75    0.20
   8   4  -4    0.75    0.28
   8   4  -4    0.71    0.21
   8   4  -4    1.18    0.27
  -8   4   4    0.64    0.21
  -7   4   4    7.08    0.52
   7   4  -4    7.48    0.67
   7   4  -4    6.48    0.64
   7   4  -4    7.49    0.62
   7   4  -4    7.68    0.67
  -7   4   4    7.64    0.65
  -7   4   4    6.66    0.64
  -6  -4   4    0.48    0.14
   6  -4  -4    0.52    0.14
   6   4  -4    0.42    0.14
   6   4  -4    0.42    0.21
   6   4  -4    0.52    0.17
   6   4  -4    0.38    0.15
  -6   4   4    0.44    0.15
  -6   4   4    0.33    0.13
  -6   4   4    0.25    0.10
  -5  -4   4    2.24    0.22
   5  -4  -4    2.41    0.21
   5   4  -4    2.57    0.37
   5   4  -4    2.71    0.36
  -5   4   4    2.15    0.27
  -5   4   4    2.52    0.30
  -5   4   4    1.75    0.27
   5   4  -4    2.06    0.31
   5   4  -4    2.69    0.36
   4   4  -4    2.70    0.38
  -3  -4   4    0.02    0.03
   3  -4  -4   -0.02    0.04
   3   4  -4    0.05    0.08
   3   4  -4   -0.01    0.10
  -3   4   4    0.09    0.07
  -3   4   4    0.06    0.06
  -3   4   4    0.00    0.02
   3   4  -4   -0.04    0.05
  -3   4   4   -0.01    0.06
  -2   4   4    4.93    0.34
   2   4  -4    5.57    0.43
   2   4  -4    5.69    0.44
  -2   4   4    5.29    0.40
   2   4  -4    5.02    0.42
  -2   4   4    4.46    0.39
   1   4  -4    4.71    0.41
   1   4  -4    5.64    0.44
  -1   4   4    5.12    0.34
  -1   4   4    4.90    0.40
   1   4  -4    5.39    0.44
  -1   4   4    5.39    0.41
   0   4   4    2.95    0.26
   0   4  -4    2.55    0.33
   0   4  -4    2.10    0.24
   0   4   4    2.51    0.21
   0   4   4    2.12    0.24
   0   4  -4    2.17    0.25
   1   4   4    0.32    0.11
  -1   4  -4    0.46    0.12
  -1   4  -4    0.46    0.15
   1   4   4    0.36    0.10
  -1   4  -4    0.49    0.13
   1   4   4    0.36    0.11
  -2   4  -4    1.19    0.22
  -2   4  -4    1.57    0.27
   2   4   4    1.47    0.25
  -2   4  -4    1.54    0.25
   2   4   4    1.61    0.22
   2   4   4    1.72    0.25
   3  -4   4   -0.01    0.03
  -3  -4  -4    0.00    0.03
  -3  -4  -4    0.13    0.07
   3  -4   4    0.14    0.09
   3   4   4    0.23    0.13
  -3   4  -4    0.07    0.09
   3   4   4    0.00    0.08
   3   4   4    0.10    0.10
  -3   4  -4    0.23    0.12
  -3   4  -4    0.40    0.15
   4   4   4    5.54    0.55
  -4   4  -4    6.30    0.55
   4   4   4    5.98    0.55
  -4   4  -4    5.26    0.47
  -4   4  -4    6.86    0.58
   4   4   4    5.57    0.47
  -5   4  -4    6.27    0.52
   5   4   4    5.99    0.51
  -6  -4  -4    0.00    0.04
   6   4   4    0.11    0.13
  -6   4  -4    0.07    0.12
  -6   4  -4    0.16    0.14
   6   4   4    0.20    0.14
   7  -4   4    5.96    0.72
  -7  -4  -4    6.27    0.73
  -7   4  -4    6.16    0.54
   7   4   4    4.56    0.61
  -8  -4  -4    1.01    0.30
   8  -4   4    1.25    0.36
   8   4   4    0.79    0.28
  -8   4  -4    0.74    0.21
  -9  -4  -4    1.68    0.41
   9  -4   4    1.65    0.43
   9   4   4    1.21    0.38
  -9   4  -4    1.66    0.36
 -10  -4  -4    1.46    0.40
  10  -4   4    1.43    0.44
  10   4   4    1.44    0.43
 -10   4  -4    1.41    0.34
 -11  -4  -4    0.58    0.32
  11  -4   4    0.73    0.36
 -11   4  -4    0.79    0.30
  11   4   4    0.61    0.39
  12   4   4    0.27    0.33
 -12   4  -4    1.23    0.34
  12  -5  -4    0.27    0.39
 -12  -5   4    0.10    0.25
 -12   5   4    0.09    0.18
  12   5  -4    0.40    0.35
  11  -5  -4    0.17    0.34
 -11  -5   4    0.30    0.27
 -11   5   4    0.43    0.20
  11   5  -4    0.22    0.29
  10  -5  -4    0.72    0.35
 -10  -5   4    0.64    0.26
  10   5  -4    1.08    0.39
 -10   5   4    1.09    0.25
   9  -5  -4    0.27    0.24
  -9  -5   4    0.69    0.24
  -9   5   4    0.26    0.15
   9   5  -4    0.23    0.24
   9   5  -4    0.31    0.22
   8  -5  -4    0.36    0.27
  -8  -5   4    0.71    0.24
   8   5  -4    0.50    0.27
   8   5  -4    0.33    0.18
  -8   5   4    0.53    0.16
   7   5  -4    2.39    0.36
   7   5  -4    2.62    0.46
  -7   5   4    2.52    0.33
  -7   5   4    2.89    0.39
   7   5  -4    2.75    0.40
  -6   5   4    2.14    0.31
   6   5  -4    2.29    0.34
  -6   5   4    2.55    0.31
   6   5  -4    2.02    0.38
   6   5  -4    2.75    0.38
   5   5  -4    5.97    0.54
   3   5  -4    0.27    0.15
  -3   5   4    0.55    0.12
   3   5  -4    0.13    0.08
  -3   5   4    0.01    0.03
  -3   5   4    0.39    0.10
   2   5  -4    0.37    0.10
  -2   5   4    0.31    0.09
   2   5  -4    0.28    0.16
  -2   5   4    0.38    0.11
   1   5  -4    1.38    0.19
   1   5  -4    2.03    0.31
  -1   5   4    1.84    0.20
  -1   5   4    1.11    0.18
   0   5  -4    1.34    0.20
   0   5   4    1.70    0.20
   0   5  -4    1.31    0.25
   1   5   4    0.41    0.11
  -1   5  -4    0.68    0.18
   1   5   4    0.57    0.13
  -1   5  -4    0.53    0.12
  -2   5  -4    0.91    0.18
   2   5   4    0.96    0.18
   2   5   4    1.03    0.19
  -2   5  -4    0.69    0.19
  -3   5  -4    0.23    0.11
   3   5   4    0.24    0.12
   3   5   4    0.29    0.12
  -3   5  -4    0.36    0.15
   4  -5   4    0.01    0.05
  -4  -5  -4    0.00    0.04
   4   5   4    0.07    0.09
  -4   5  -4    0.03    0.07
   4   5   4    0.17    0.14
  -4   5  -4    0.17    0.13
  -4   5  -4   -0.02    0.03
   4   5   4    0.00    0.03
   5   5   4    1.40    0.28
  -5   5  -4    1.34    0.28
  -6  -5  -4    4.58    0.58
   6  -5   4    5.15    0.63
   6   5   4    3.67    0.50
  -6   5  -4    3.46    0.47
  -7  -5  -4    1.36    0.34
   7  -5   4    1.69    0.41
  -7   5  -4    1.37    0.29
   7   5   4    1.30    0.34
  -8  -5  -4    0.22    0.23
   8  -5   4    0.80    0.33
  -8   5  -4    0.35    0.20
   8   5   4    0.37    0.23
  -9  -5  -4    0.26    0.25
   9  -5   4    0.23    0.25
   9   5   4   -0.12    0.20
  -9   5  -4    0.25    0.17
 -10  -5  -4    0.01    0.24
  10  -5   4    0.18    0.29
 -10   5  -4    0.16    0.19
  10   5   4   -0.07    0.26
  10   6  -4    0.67    0.40
 -10   6   4    1.49    0.32
   9   6  -4    0.63    0.31
   9   6  -4    1.06    0.31
  -9   6   4    0.95    0.25
  -8   6   4    0.18    0.17
   8   6  -4    0.45    0.20
   8   6  -4    0.64    0.31
  -7   6   4    0.47    0.16
  -7   6   4    0.47    0.17
   7   6  -4    0.59    0.21
   7   6  -4    0.71    0.31
   6   6  -4   -0.02    0.04
   6   6  -4    0.14    0.20
  -6   6   4    0.12    0.09
  -6   6   4    0.10    0.12
  -6   6   4    0.11    0.12
   6   6  -4    0.13    0.12
   6   6  -4    0.07    0.09
  -6   6   4   -0.01    0.03
   5   6  -4    1.40    0.26
  -5   6   4    0.95    0.18
   5   6  -4    1.07    0.29
  -5   6   4    1.28    0.24
   5   6  -4    1.06    0.21
  -5   6   4    0.90    0.19
  -4   6   4    0.72    0.16
   4   6  -4    0.41    0.14
  -4   6   4    0.59    0.16
  -4   6   4    0.58    0.13
   4   6  -4    0.37    0.22
   3   6  -4    0.04    0.07
  -3   6   4    0.11    0.06
  -3   6   4   -0.01    0.02
   3   6  -4   -0.02    0.03
   0   6   4    1.12    0.18
   0   6  -4    1.55    0.22
   1   6   4   -0.01    0.02
   1   6   4   -0.02    0.05
  -1   6  -4    0.03    0.03
  -1   6  -4    0.07    0.07
   2   6   4    0.94    0.20
   2   6   4    1.12    0.20
  -2   6  -4    0.71    0.19
  -2   6  -4    0.83    0.18
   3   6   4    0.27    0.13
  -3   6  -4    0.21    0.15
   3   6   4    0.25    0.10
  -3   6  -4    0.08    0.09
   4   6   4    0.23    0.16
   4   6   4    0.19    0.10
  -4   6  -4    0.34    0.13
  -4   6  -4    0.13    0.15
  -5   6  -4    0.51    0.19
  -5   6  -4    0.00    0.04
   5   6   4    0.01    0.16
   5   6   4    0.04    0.04
   6   6   4    0.11    0.18
   6   6   4    0.04    0.04
  -6   6  -4    0.11    0.15
  -6   6  -4    0.04    0.05
   7   6   4    0.54    0.28
  -7   6  -4    0.46    0.22
   8   6   4   -0.07    0.21
  -8   6  -4    0.05    0.15
   7   7  -4    0.26    0.17
  -7   7   4    0.25    0.19
   7   7  -4    0.03    0.28
  -7   7   4   -0.02    0.04
   7   7  -4    0.03    0.05
  -7   7   4    0.09    0.12
  -6   7   4    0.25    0.18
   6   7  -4    0.15    0.10
   6   7  -4   -0.03    0.04
  -6   7   4   -0.01    0.09
  -6   7   4    0.02    0.04
   6   7  -4    0.02    0.15
  -5   7   4    0.07    0.08
  -5   7   4   -0.03    0.15
   5   7  -4    0.00    0.07
   5   7  -4    0.04    0.11
  -5   7   4    0.02    0.03
   5   7  -4   -0.03    0.04
  -4   7   4   -0.05    0.06
   4   7  -4    0.10    0.15
   4   7  -4    0.18    0.10
   3   7  -4    0.25    0.10
  -3   7   4    0.30    0.11
   2   7  -4    0.58    0.13
  -2   7   4    0.68    0.14
   0   7  -4    1.04    0.18
  -1   7  -4    0.08    0.07
   1   7   4    0.11    0.08
  -1   7  -4   -0.01    0.03
   1   7   4    0.00    0.03
   2   7   4    0.08    0.08
  -2   7  -4    0.11    0.09
  -2   7  -4   -0.01    0.04
   2   7   4   -0.02    0.03
   3   7   4    0.02    0.03
  -3   7  -4   -0.01    0.04
  -3   7  -4    0.24    0.11
   3   7   4    0.09    0.10
   4   7   4    0.26    0.13
  -4   7  -4    0.39    0.17
  -5   7  -4    0.09    0.14
   5   7   4   -0.07    0.21
  16   0  -5    0.31    0.41
 -16   0   5    0.03    0.27
 -15   0   5    0.82    0.38
  15   0  -5    0.84    0.42
 -14   0   5    0.37    0.27
  14   0  -5    0.08    0.31
 -13   0   5   -0.02    0.05
  13   0  -5    0.01    0.09
 -13   0   5    0.25    0.24
  13   0  -5   -0.01    0.27
 -12   0   5    3.84    0.60
  12   0  -5    3.39    0.73
 -11   0   5    2.05    0.43
  11   0  -5    1.35    0.45
 -10   0   5    2.88    0.47
  10   0  -5    3.70    0.64
  -8   0   5    7.59    0.62
  -8   0   5    8.27    0.72
   8   0  -5    8.24    0.79
  -8   0   5    6.56    0.63
   8   0  -5    8.36    0.66
   8   0  -5    7.36    0.71
   7   0  -5   18.65    1.33
  -7   0   5   20.86    1.29
   7   0  -5   17.33    1.32
  -7   0   5   19.92    1.22
   7   0  -5   19.12    1.25
  -7   0   5   20.03    1.34
   6   0  -5   -0.03    0.07
   6   0  -5    0.07    0.10
  -6   0   5    0.08    0.08
   6   0  -5   -0.01    0.04
  -6   0   5    0.01    0.06
  -6   0   5   -0.01    0.02
  -6   0   5    0.05    0.12
   6   0  -5   -0.04    0.10
  -5   0   5    0.21    0.13
   5   0  -5   -0.03    0.04
   5   0  -5    0.33    0.12
  -5   0   5    0.29    0.12
  -5   0   5    0.14    0.09
   5   0  -5    0.36    0.17
   5   0  -5    0.09    0.11
   4   0  -5   27.35    1.56
   4   0  -5   25.29    1.61
  -4   0   5   26.32    1.49
  -4   0   5   25.88    1.55
  -4   0   5   25.70    1.61
   4   0  -5   23.93    1.57
   3   0  -5   18.50    1.13
   3   0  -5   17.47    1.16
  -3   0   5   19.47    1.14
  -3   0   5   16.74    1.07
  -3   0   5   18.78    1.20
   3   0  -5   18.95    1.19
  -2   0   5   10.84    0.65
   2   0  -5   10.07    0.67
  -2   0   5   10.37    0.73
  -2   0   5    9.62    0.67
   2   0  -5    9.13    0.71
   2   0  -5    9.43    0.71
  -1   0   5  263.24   13.84
   1   0  -5  266.91   13.27
   1   0  -5  232.73   13.80
  -1   0   5  240.11   13.76
   1   0  -5  277.77   13.79
  -1   0   5  255.03   13.18
   0   0   5    1.41    0.21
   0   0  -5    1.54    0.21
   0   0   5    1.29    0.20
   0   0   5    1.16    0.21
   0   0  -5    1.69    0.28
   0   0  -5    1.32    0.22
   1   0   5    2.04    0.26
  -1   0  -5    1.43    0.25
  -1   0  -5    1.49    0.22
  -1   0  -5    1.66    0.25
   1   0   5    1.85    0.25
   1   0   5    2.10    0.29
  -2   0  -5    0.02    0.08
   2   0   5    0.13    0.09
   2   0   5    0.00    0.02
   2   0   5   -0.04    0.07
  -2   0  -5    0.07    0.08
  -2   0  -5    0.09    0.08
   2   0   5    0.17    0.10
  -2   0  -5    0.00    0.02
   3   0   5   67.16    4.02
  -3   0  -5   78.33    4.05
   3   0   5   69.27    4.06
  -3   0  -5   68.23    3.88
  -3   0  -5   73.39    4.04
   3   0   5   71.80    3.85
  -4   0  -5    4.46    0.45
  -4   0  -5    5.67    0.49
   4   0   5    4.09    0.52
   4   0   5    4.59    0.46
  -4   0  -5    5.36    0.48
   4   0   5    5.60    0.47
   5   0   5    0.80    0.22
  -5   0  -5    0.61    0.20
   5   0   5    0.39    0.18
  -5   0  -5    0.53    0.19
   5   0   5    0.35    0.17
  -5   0  -5    0.46    0.16
  -6   0  -5    1.14    0.28
   6   0   5    0.46    0.20
   9   0   5    2.68    0.52
  -9   0  -5    2.30    0.46
 -10   0  -5    2.55    0.52
  10   0   5    3.97    0.67
 -11   0  -5    1.79    0.48
  11   0   5    2.20    0.52
 -12   0  -5    1.64    0.49
  12   0   5    1.35    0.50
  13   0   5    0.72    0.46
 -13   0  -5    0.31    0.35
  16  -1  -5    0.87    0.52
 -16  -1   5   -0.02    0.28
  16   1  -5    0.51    0.48
 -16   1   5    0.50    0.30
 -16   1   5    0.59    0.40
  16   1  -5    0.28    0.43
  15  -1  -5    1.13    0.54
 -15  -1   5    0.94    0.43
  15   1  -5    0.28    0.37
 -15   1   5    0.32    0.23
  15   1  -5    0.23    0.33
 -15   1   5    1.11    0.42
 -14  -1   5    0.36    0.28
  14  -1  -5   -0.14    0.26
  14   1  -5   -0.03    0.13
 -14   1   5    0.47    0.33
  14   1  -5    0.16    0.33
  13  -1  -5    0.80    0.38
 -13  -1   5    0.31    0.23
  13   1  -5    0.76    0.39
  13   1  -5   -0.05    0.09
 -13   1   5    0.48    0.30
 -12  -1   5    8.84    0.82
  12  -1  -5    8.23    1.11
 -12   1   5    8.62    0.77
  12   1  -5    9.07    1.15
  11  -1  -5    5.53    0.87
 -11  -1   5    6.61    0.64
 -11   1   5    5.71    0.60
  11   1  -5    7.29    0.94
 -10  -1   5    0.23    0.19
  10  -1  -5    0.23    0.21
  10   1  -5   -0.02    0.06
  10   1  -5    0.27    0.21
 -10   1   5    0.54    0.21
   9  -1  -5   12.76    1.08
  -8  -1   5    7.52    0.66
   8  -1  -5    8.19    0.78
  -8  -1   5    9.23    0.76
   8  -1  -5    9.13    0.70
  -8   1   5    8.29    0.71
  -8   1   5    7.80    0.64
   8   1  -5    8.71    0.78
   8   1  -5    9.55    0.79
  -7  -1   5    5.22    0.48
  -7  -1   5    5.08    0.52
  -7  -1   5    5.42    0.47
   7  -1  -5    4.54    0.62
   7  -1  -5    5.91    0.49
   7  -1  -5    5.34    0.56
  -7   1   5    4.39    0.50
   7   1  -5    4.84    0.61
   7   1  -5    5.26    0.51
  -7   1   5    4.50    0.46
  -7   1   5    5.97    0.55
   7   1  -5    5.07    0.61
  -7   1   5    5.07    0.44
  -7   1   5    5.64    0.52
   7   1  -5    5.25    0.48
   7   1  -5    4.50    0.45
   6  -1  -5   92.29    5.15
  -6  -1   5   87.00    5.21
   6  -1  -5  101.21    5.28
   6  -1  -5   90.20    5.08
  -6  -1   5   92.33    4.95
   6   1  -5   84.37    5.79
   6   1  -5   97.19    5.81
  -6   1   5   88.52    5.23
   6   1  -5   91.63    5.25
  -6   1   5   91.98    5.17
   6   1  -5   94.19    5.07
   6   1  -5   96.80    5.18
  -6   1   5   92.07    5.80
  -6   1   5   98.82    5.81
   6   1  -5   89.01    5.46
  -6   1   5   98.03    4.94
  -5  -1   5   26.20    1.67
   5  -1  -5   31.13    1.85
  -5  -1   5   33.13    1.85
  -5  -1   5   30.77    1.77
   5  -1  -5   29.52    1.76
   5   1  -5   28.99    1.96
   5   1  -5   29.31    1.96
  -5   1   5   31.11    1.96
   5   1  -5   27.97    1.85
   5   1  -5   28.53    1.79
  -5   1   5   27.33    1.82
  -5   1   5   28.57    1.76
   5   1  -5   27.15    1.76
  -5   1   5   32.77    1.69
   5   1  -5   30.47    1.85
   4  -1  -5   93.12    5.38
  -4  -1   5   97.03    5.45
   4  -1  -5  104.74    5.47
  -4  -1   5   97.79    5.39
   4   1  -5  101.33    5.40
   4   1  -5   99.41    6.07
  -4   1   5   97.89    5.15
  -4   1   5   97.78    6.06
   4   1  -5   94.49    6.06
   4   1  -5   96.69    5.26
  -4   1   5   92.99    5.38
  -4   1   5  103.48    5.48
   4   1  -5  101.51    5.48
  -4   1   5   93.73    6.06
   3  -1  -5   25.71    1.46
  -3  -1   5   23.14    1.44
  -3  -1   5   23.19    1.38
   3  -1  -5   24.41    1.38
  -3   1   5   24.31    1.53
  -3   1   5   22.25    1.38
   3   1  -5   21.53    1.53
  -3   1   5   23.35    1.31
  -3   1   5   20.33    1.42
   3   1  -5   24.54    1.41
   3   1  -5   23.50    1.44
   3   1  -5   20.83    1.51
   3   1  -5   22.05    1.37
  -3   1   5   22.74    1.53
   2  -1  -5    7.03    0.57
  -2  -1   5    7.73    0.54
  -2  -1   5    7.22    0.57
   2  -1  -5    7.00    0.53
  -2   1   5    7.51    0.57
   2   1  -5    7.55    0.54
   2   1  -5    7.27    0.57
   2   1  -5    8.14    0.58
   2   1  -5    7.13    0.58
  -2   1   5    8.65    0.52
  -2   1   5    6.85    0.58
   2   1  -5    7.58    0.59
  -2   1   5    6.93    0.58
  -2   1   5    7.88    0.55
  -1  -1   5   14.36    0.97
   1  -1  -5   14.86    1.02
  -1  -1   5   15.57    1.03
   1  -1  -5   14.76    0.97
  -1   1   5   15.95    1.08
   1   1  -5   17.99    1.06
   1   1  -5   16.22    1.09
   1   1  -5   15.56    0.99
  -1   1   5   15.59    1.04
   1   1  -5   16.30    1.08
  -1   1   5   16.80    0.94
   1   1  -5   15.08    0.99
  -1   1   5   15.52    0.99
   0  -1  -5    0.33    0.09
   0  -1  -5    0.42    0.13
   0  -1   5    0.54    0.13
   0  -1   5    0.44    0.14
   0   1   5    0.27    0.11
   0   1   5    0.42    0.11
   0   1   5    0.83    0.15
   0   1  -5    0.42    0.14
   0   1  -5    0.29    0.10
   0   1  -5    0.22    0.12
   0   1   5    0.52    0.14
   0   1  -5    0.38    0.10
   0   1  -5    0.49    0.14
   0   1   5    0.33    0.11
   1  -1   5   21.47    1.25
  -1  -1  -5   21.25    1.27
  -1  -1  -5   19.80    1.23
   1  -1   5   23.52    1.31
  -1   1  -5   21.95    1.39
   1   1   5   19.50    1.24
  -1   1  -5   19.50    1.28
   1   1   5   19.75    1.37
  -1   1  -5   18.75    1.24
  -1   1  -5   19.23    1.22
   1   1   5   18.08    1.28
   1   1   5   18.78    1.35
   1   1   5   19.90    1.18
  -1   1  -5   20.31    1.36
   2  -1   5   53.10    3.23
   2  -1   5   57.56    3.11
  -2  -1  -5   60.65    3.24
  -2  -1  -5   58.67    3.25
   2  -1   5   57.40    3.29
   2   1   5   61.44    3.30
  -2   1  -5   56.90    3.13
  -2   1  -5   57.33    3.63
  -2   1  -5   56.49    3.25
   2   1   5   53.28    3.08
   2   1   5   59.23    3.63
  -2   1  -5   51.45    3.60
   2   1   5   59.17    3.25
  -2   1  -5   55.37    3.27
   2   1   5   58.68    3.61
   3  -1   5   88.95    5.08
  -3  -1  -5   84.25    5.06
  -3  -1  -5   86.64    5.06
  -3  -1  -5   92.11    4.92
   3  -1   5   86.34    4.87
   3  -1   5   81.19    5.09
  -3   1  -5   92.61    5.72
   3   1   5  101.46    4.89
   3   1   5   90.32    5.09
  -3   1  -5   89.90    5.67
  -3   1  -5  100.51    5.11
  -3   1  -5   98.76    4.91
  -3   1  -5   92.49    5.11
   3   1   5   92.70    5.69
   3   1   5   91.90    5.70
   3   1   5   89.52    5.12
  -4  -1  -5   48.44    2.74
  -4  -1  -5   49.72    2.80
  -4  -1  -5   44.75    2.78
   4  -1   5   48.92    2.82
   4  -1   5   47.26    2.85
   4  -1   5   45.54    2.69
  -4   1  -5   50.27    2.72
  -4   1  -5   48.97    2.82
   4   1   5   46.49    2.82
   4   1   5   53.83    2.72
  -4   1  -5   48.56    3.12
  -4   1  -5   46.48    2.81
   4   1   5   45.30    3.09
   4   1   5   48.05    2.86
   5  -1   5    8.86    0.71
  -5  -1  -5    8.55    0.72
  -5  -1  -5    9.12    0.72
   5  -1   5   10.94    0.80
  -5   1  -5    7.91    0.69
   5   1   5    9.22    0.76
  -5   1  -5    9.86    0.76
   5   1   5    8.03    0.69
  -6  -1  -5    7.05    0.64
  -6   1  -5    6.61    0.60
  -7  -1  -5    7.98    0.72
  -8  -1  -5   14.73    1.10
   8  -1   5   14.76    1.12
   8   1   5   13.86    1.09
  -8   1  -5   13.24    1.06
   9  -1   5    3.42    0.59
  -9  -1  -5    2.33    0.50
   9   1   5    2.50    0.49
  -9   1  -5    2.70    0.48
  10  -1   5    0.51    0.30
 -10  -1  -5    0.50    0.27
 -10   1  -5    0.76    0.33
  10   1   5    0.29    0.26
  10   1   5    0.03    0.08
 -11  -1  -5    0.97    0.39
  11  -1   5    1.23    0.43
 -11   1  -5    1.97    0.49
  11   1   5    1.21    0.45
  11   1   5    0.39    0.21
 -12  -1  -5    0.42    0.32
  12  -1   5    0.76    0.43
 -12   1  -5    0.46    0.24
 -12   1  -5    0.51    0.34
  12   1   5    0.51    0.38
  12   1   5    0.37    0.36
  13  -1   5    0.16    0.31
 -13  -1  -5    0.93    0.41
 -13   1  -5    0.74    0.35
  13   1   5    0.74    0.42
  13   1   5    0.36    0.42
 -13   1  -5    0.78    0.41
 -16  -2   5    0.16    0.29
  16  -2  -5    0.12    0.39
  16   2  -5    0.18    0.37
 -16   2   5    0.53    0.31
 -15  -2   5    1.19    0.45
  15  -2  -5    0.28    0.34
 -15   2   5    1.26    0.36
  15   2  -5    0.33    0.39
 -14  -2   5   -0.06    0.24
  14  -2  -5    0.04    0.30
 -14   2   5    0.14    0.21
  14   2  -5    0.06    0.31
 -13  -2   5    1.21    0.38
  13  -2  -5    0.97    0.45
 -13   2   5    0.96    0.29
  13   2  -5    0.57    0.37
  12  -2  -5    1.24    0.46
 -12  -2   5    2.86    0.50
  11  -2  -5    5.91    0.89
 -11  -2   5    5.77    0.73
  11   2  -5    5.07    0.77
  10  -2  -5    2.13    0.38
 -10  -2   5    2.14    0.40
 -10   2   5    2.64    0.42
  10   2  -5    2.53    0.51
  -8  -2   5    5.07    0.59
   8   2  -5    4.27    0.60
  -7  -2   5   19.30    1.25
   7  -2  -5   17.12    1.15
   7   2  -5   15.25    1.29
  -7   2   5   18.96    1.30
   7   2  -5   16.30    1.20
   7   2  -5   18.40    1.23
  -7   2   5   19.05    1.30
  -7   2   5   17.27    1.10
   7   2  -5   17.20    1.29
   6  -2  -5   42.29    2.53
  -6  -2   5   41.49    2.58
   6   2  -5   47.17    2.70
  -6   2   5   42.12    2.27
  -6   2   5   43.79    2.63
   6   2  -5   44.75    2.56
   6   2  -5   42.94    2.55
   6   2  -5   39.16    2.41
  -6   2   5   43.30    2.84
  -6   2   5   45.92    2.86
   6   2  -5   46.88    2.87
   6   2  -5   45.99    2.85
  -6   2   5   41.86    2.41
   5  -2  -5   90.00    4.75
  -5  -2   5   86.67    4.81
  -5   2   5   79.36    4.76
   5   2  -5   90.73    5.37
  -5   2   5   92.29    5.37
  -5   2   5   79.35    4.25
   5   2  -5   82.76    4.77
   5   2  -5   92.27    4.68
  -5   2   5   86.27    4.54
   5   2  -5   81.57    5.35
   5   2  -5   88.63    4.43
  -5   2   5   82.44    5.34
   5   2  -5   82.51    4.85
  -5   2   5   87.39    4.85
   4  -2  -5   40.93    2.28
  -4  -2   5   39.44    2.33
   4   2  -5   40.94    2.58
   4   2  -5   38.67    2.17
   4   2  -5   39.77    2.37
  -4   2   5   40.62    2.30
  -4   2   5   38.08    2.18
  -4   2   5   42.20    2.39
   4   2  -5   43.85    2.59
  -4   2   5   37.67    2.55
   4   2  -5   37.61    2.26
   4   2  -5   37.39    2.29
  -4   2   5   39.09    2.56
  -4   2   5   40.93    2.04
   3  -2  -5   38.36    2.28
  -3  -2   5   39.80    2.34
   3   2  -5   40.31    2.31
  -3   2   5   41.52    2.38
  -3   2   5   38.55    2.04
   3   2  -5   39.10    2.17
   3   2  -5   41.19    2.57
  -3   2   5   38.96    2.57
   3   2  -5   42.48    2.60
  -3   2   5   41.33    2.31
  -3   2   5   39.10    2.56
   3   2  -5   41.56    2.37
   2  -2  -5   34.63    1.98
  -2  -2   5   36.04    2.05
   2   2  -5   32.65    1.99
  -2   2   5   34.99    2.23
  -2   2   5   36.75    2.07
   2   2  -5   34.73    2.22
   2   2  -5   34.25    1.89
  -2   2   5   35.20    1.78
  -2   2   5   32.93    2.21
   2   2  -5   33.76    2.06
   1  -2  -5    3.47    0.30
  -1  -2   5    3.28    0.34
  -1   2   5    2.81    0.36
   1   2  -5    3.65    0.36
   1   2  -5    3.02    0.33
  -1   2   5    3.30    0.26
  -1   2   5    3.46    0.32
  -1   2   5    3.45    0.31
  -1   2   5    3.46    0.33
   1   2  -5    3.29    0.32
   1   2  -5    3.65    0.32
   1   2  -5    3.38    0.40
   0  -2   5   33.76    1.93
   0  -2  -5   32.76    1.86
   0   2   5   32.85    2.08
   0   2   5   28.83    2.07
   0   2   5   30.69    1.87
   0   2  -5   35.53    1.95
   0   2  -5   33.16    1.77
   0   2  -5   32.75    1.88
   0   2   5   32.94    1.66
   0   2  -5   32.49    2.10
   0   2   5   31.66    1.93
   0   2  -5   29.57    2.07
  -1  -2  -5   97.27    5.59
   1  -2   5  103.73    5.67
   1   2   5  100.57    6.33
  -1   2  -5  101.53    6.32
   1   2   5  106.88    5.04
  -1   2  -5  101.50    5.63
   1   2   5   95.63    5.35
  -1   2  -5   97.66    5.11
  -1   2  -5  105.84    5.68
   1   2   5  107.14    6.32
   1   2   5  105.57    5.69
   1   2   5   98.98    5.62
  -1   2  -5   95.94    5.39
  -1   2  -5  112.49    6.36
  -2  -2  -5   76.35    4.15
   2  -2   5   73.28    4.21
  -2   2  -5   74.40    4.01
  -2   2  -5   77.03    4.23
   2   2   5   73.35    4.22
   2   2   5   69.43    3.97
   2   2   5   74.37    4.18
   2   2   5   75.74    4.67
   2   2   5   72.08    4.68
  -2   2  -5   76.02    3.81
  -2   2  -5   80.90    4.71
   2   2   5   75.23    3.74
  -2   2  -5   69.02    4.66
  -2   2  -5   78.19    4.20
  -3  -2  -5   20.94    1.36
   3  -2   5   20.33    1.41
  -3   2  -5   22.67    1.41
   3   2   5   21.71    1.53
   3   2   5   21.90    1.33
  -3   2  -5   25.11    1.57
  -3   2  -5   19.67    1.27
  -3   2  -5   22.99    1.53
  -3   2  -5   20.58    1.33
  -3   2  -5   22.68    1.48
   3   2   5   20.76    1.24
   3   2   5   23.85    1.53
   3   2   5   23.87    1.46
  -5  -2  -5    1.99    0.31
   5  -2   5    1.64    0.31
  -5   2  -5    2.32    0.35
   6  -2   5    1.88    0.36
  -6  -2  -5    1.85    0.32
  -6   2  -5    1.23    0.28
   6   2   5    1.46    0.32
  -7  -2  -5    1.74    0.34
   7  -2   5    2.19    0.41
   7   2   5    2.11    0.39
  -7   2  -5    1.85    0.37
  -8  -2  -5    0.94    0.32
   8  -2   5    0.21    0.21
   8   2   5    0.02    0.05
  -8   2  -5    0.34    0.17
   8   2   5    0.20    0.17
   9  -2   5    4.00    0.66
  -9  -2  -5    3.24    0.58
 -10  -2  -5    1.27    0.39
  10  -2   5    1.25    0.40
 -10   2  -5    1.58    0.35
  10   2   5    1.42    0.44
 -11  -2  -5   -0.05    0.24
  11  -2   5    0.09    0.26
 -11   2  -5    0.07    0.20
  11   2   5    0.08    0.29
 -12  -2  -5   -0.01    0.21
  12  -2   5   -0.04    0.24
 -12   2  -5    0.02    0.20
  12   2   5   -0.10    0.27
 -13  -2  -5    0.54    0.34
  13  -2   5    0.76    0.42
 -13   2  -5    0.90    0.37
  13   2   5    0.08    0.40
  15  -3  -5    1.24    0.59
 -15  -3   5    2.42    0.56
  15   3  -5    0.37    0.36
 -15   3   5    1.22    0.36
 -14  -3   5    0.80    0.33
  14  -3  -5    1.16    0.58
  14   3  -5    0.63    0.41
 -14   3   5    1.45    0.37
  13  -3  -5    1.03    0.44
 -13  -3   5    1.15    0.39
  13   3  -5    0.59    0.35
 -13   3   5    1.85    0.39
  12  -3  -5    0.18    0.29
 -12  -3   5    0.81    0.32
 -12   3   5    0.73    0.26
  12   3  -5    0.27    0.26
 -11  -3   5    5.49    0.72
  11  -3  -5    3.93    0.71
  10  -3  -5    4.41    0.53
 -10  -3   5    2.67    0.46
 -10  -3   5    3.66    0.52
  10  -3  -5    3.98    0.70
  -9  -3   5    3.45    0.48
   9  -3  -5    3.56    0.46
  -9   3   5    3.76    0.45
   9   3  -5    3.39    0.57
  -8  -3   5    8.33    0.69
   8  -3  -5    7.41    0.63
   8   3  -5    7.17    0.65
  -8   3   5    8.01    0.72
  -8   3   5    8.07    0.59
   8   3  -5    6.60    0.79
  -7  -3   5    8.92    0.73
   7  -3  -5    9.48    0.69
   7   3  -5   10.24    0.79
  -7   3   5    9.43    0.76
   7   3  -5    9.12    0.78
  -7   3   5    9.64    0.78
   7   3  -5    8.58    0.75
   7   3  -5    8.60    0.72
  -7   3   5    7.85    0.61
  -5  -3   5   22.69    1.42
   5  -3  -5   22.86    1.36
  -5   3   5   22.48    1.55
   5   3  -5   21.09    1.54
  -5   3   5   21.89    1.53
  -5   3   5   24.51    1.49
   5   3  -5   20.97    1.37
   5   3  -5   23.45    1.42
   5   3  -5   23.52    1.57
  -5   3   5   22.88    1.25
   4  -3  -5   20.92    1.30
  -4  -3   5   22.12    1.35
  -4   3   5   22.10    1.42
  -4   3   5   20.06    1.46
   4   3  -5   22.36    1.51
   4   3  -5   22.79    1.35
  -4   3   5   23.28    1.49
  -4   3   5   22.09    1.19
   4   3  -5   22.42    1.50
   4   3  -5   20.91    1.31
   3  -3  -5   24.03    1.45
  -3  -3   5   24.05    1.50
  -3   3   5   22.68    1.63
  -3   3   5   26.00    1.66
   3   3  -5   24.37    1.44
   3   3  -5   25.33    1.50
   3   3  -5   26.39    1.69
  -3   3   5   25.88    1.57
   3   3  -5   26.11    1.66
  -3   3   5   25.56    1.33
   2  -3  -5    3.72    0.31
  -2   3   5    4.17    0.37
  -2   3   5    4.49    0.31
   2   3  -5    4.86    0.42
  -2   3   5    3.83    0.37
   2   3  -5    4.21    0.36
  -2   3   5    4.24    0.41
   2   3  -5    4.23    0.38
   2   3  -5    3.76    0.37
  -1  -3   5    9.01    0.63
   1  -3  -5    9.01    0.59
   1   3  -5    9.33    0.65
   1   3  -5    9.17    0.64
  -1   3   5    8.90    0.68
  -1   3   5    9.13    0.67
   1   3  -5    8.57    0.67
  -1   3   5    8.86    0.55
   1   3  -5    9.13    0.69
  -1   3   5    8.31    0.67
   0  -3  -5   11.38    0.72
   0  -3   5   11.20    0.77
   0   3   5   12.19    0.83
   0   3  -5   12.67    0.78
   0   3   5   10.15    0.80
   0   3   5   11.44    0.66
   0   3  -5   11.80    0.83
   0   3   5   10.82    0.81
   0   3  -5   11.56    0.85
   0   3  -5    9.72    0.73
   1  -3   5    0.17    0.11
  -1  -3  -5    0.27    0.09
   1   3   5    0.44    0.13
  -1   3  -5    0.20    0.10
  -1   3  -5    0.44    0.17
  -1   3  -5    0.20    0.10
   1   3   5    0.20    0.13
  -1   3  -5    0.15    0.09
   1   3   5    0.23    0.10
   1   3   5    0.30    0.09
  -2  -3  -5    6.97    0.53
   2  -3   5    7.74    0.60
  -2   3  -5    8.05    0.64
  -2   3  -5    7.05    0.60
   2   3   5    7.40    0.50
   2   3   5    7.12    0.60
   2   3   5    8.22    0.63
  -2   3  -5    7.34    0.59
   2   3   5    7.20    0.62
  -2   3  -5    6.30    0.54
   3  -3   5    0.67    0.18
  -3  -3  -5    0.98    0.18
  -3   3  -5    1.04    0.23
   3   3   5    0.81    0.21
  -3   3  -5    0.94    0.22
   3   3   5    0.92    0.21
   3   3   5    0.89    0.19
  -3   3  -5    0.50    0.17
  -4  -3  -5    1.85    0.27
   4  -3   5    1.92    0.33
  -4   3  -5    1.30    0.27
   4   3   5    1.79    0.32
   4   3   5    1.83    0.30
  -4   3  -5    1.47    0.29
   4   3   5    1.75    0.29
  -4   3  -5    2.11    0.34
   5  -3   5    0.72    0.23
  -5  -3  -5    0.68    0.19
  -5   3  -5    0.36    0.17
  -5   3  -5    0.32    0.17
   5   3   5    0.35    0.16
   5   3   5    0.28    0.18
  -6  -3  -5    3.71    0.46
   6  -3   5    3.93    0.54
  -6   3  -5    3.92    0.50
   6   3   5    3.13    0.46
   7  -3   5    7.98    0.76
  -7  -3  -5    7.91    0.73
  -8  -3  -5    0.30    0.22
   8  -3   5    0.04    0.17
  -8   3  -5    0.00    0.04
   8   3   5    0.00    0.06
   9  -3   5    0.97    0.36
  -9  -3  -5    0.47    0.27
  -9   3  -5    0.40    0.20
   9   3   5    0.53    0.28
 -10  -3  -5    0.56    0.29
  10  -3   5    0.41    0.30
 -10   3  -5    0.70    0.27
  10   3   5    0.46    0.31
  11  -3   5    0.25    0.31
 -11  -3  -5   -0.06    0.24
  11   3   5    0.03    0.29
 -11   3  -5    0.32    0.25
 -12  -3  -5    0.14    0.29
  12  -3   5   -0.02    0.30
 -12   3  -5   -0.04    0.21
  12   3   5    0.81    0.45
  14  -4  -5    0.58    0.42
 -14  -4   5    0.36    0.31
  14   4  -5   -0.46    0.29
 -14   4   5   -0.10    0.16
 -13  -4   5    0.67    0.34
  13  -4  -5   -0.07    0.26
  13   4  -5    0.39    0.34
 -13   4   5    0.83    0.28
 -12  -4   5    0.01    0.23
  12  -4  -5    0.15    0.23
 -12   4   5   -0.03    0.15
  12   4  -5   -0.05    0.24
 -11  -4   5    0.61    0.26
  11  -4  -5    0.36    0.30
 -11   4   5    0.90    0.24
  11   4  -5    1.11    0.41
  10  -4  -5    1.67    0.45
 -10  -4   5    1.03    0.29
  10   4  -5    1.30    0.39
 -10   4   5    1.26    0.27
   9  -4  -5    0.05    0.22
  -9  -4   5   -0.07    0.13
  -9   4   5    0.02    0.11
   9   4  -5    0.22    0.21
  -8  -4   5   -0.05    0.05
   8  -4  -5   -0.02    0.07
  -8   4   5    0.09    0.13
   8   4  -5    0.07    0.09
   8   4  -5    0.05    0.15
  -8   4   5   -0.02    0.07
   8   4  -5    0.10    0.23
  -7   4   5    1.82    0.32
   7   4  -5    1.83    0.35
   7   4  -5    2.97    0.43
   7   4  -5    2.14    0.41
  -7   4   5    2.41    0.33
   7   4  -5    2.35    0.37
  -7   4   5    1.86    0.32
  -6   4   5    3.17    0.37
   6   4  -5    3.32    0.44
   6   4  -5    3.69    0.53
   6   4  -5    3.33    0.44
  -6   4   5    3.20    0.38
  -6   4   5    3.40    0.32
  -5  -4   5    5.41    0.42
   5  -4  -5    4.80    0.38
   5   4  -5    5.94    0.52
  -5   4   5    5.43    0.48
   5   4  -5    5.33    0.62
  -5   4   5    5.01    0.39
  -5   4   5    4.88    0.48
   5   4  -5    5.17    0.48
  -4  -4   5    1.63    0.20
  -4   4   5    1.82    0.23
   4   4  -5    1.48    0.25
  -4   4   5    1.38    0.23
   4   4  -5    1.47    0.31
   4   4  -5    1.97    0.30
  -4   4   5    1.63    0.26
   3   4  -5    1.65    0.25
  -3   4   5    1.49    0.21
   3   4  -5    1.51    0.31
   3   4  -5    1.70    0.27
  -3   4   5    1.64    0.23
  -3   4   5    1.73    0.25
   2   4  -5    8.34    0.63
  -2   4   5    8.00    0.62
  -2   4   5    7.82    0.61
   2   4  -5    8.79    0.65
   2   4  -5    7.84    0.61
  -2   4   5    7.77    0.50
  -1   4   5    3.54    0.28
  -1   4   5    3.00    0.33
   1   4  -5    3.13    0.33
  -1   4   5    4.06    0.35
   1   4  -5    3.34    0.35
   1   4  -5    3.89    0.45
   0   4  -5    2.24    0.33
   0   4   5    2.31    0.25
   0   4  -5    1.88    0.27
   0   4  -5    2.42    0.32
   1  -4   5    0.24    0.08
   1   4   5    0.97    0.16
  -1   4  -5    0.71    0.19
  -1   4  -5    1.02    0.23
   1   4   5    0.80    0.18
   1   4   5    0.93    0.19
  -1   4  -5    0.81    0.17
   2  -4   5    0.44    0.13
  -2  -4  -5    0.34    0.09
  -2   4  -5    0.42    0.15
  -2   4  -5    0.36    0.13
   2   4   5    0.31    0.14
  -2   4  -5    0.33    0.15
   2   4   5    0.18    0.10
   2   4   5    0.43    0.14
   3   4   5    1.06    0.22
  -3   4  -5    0.93    0.22
  -3   4  -5    0.88    0.23
  -3   4  -5    1.08    0.25
   3   4   5    1.20    0.24
   3   4   5    1.57    0.29
   4   4   5   12.43    0.99
   4   4   5   12.17    0.83
   4   4   5   12.84    0.99
  -4   4  -5   11.84    0.99
  -4   4  -5   12.48    0.98
  -4   4  -5   13.69    0.87
  -5   4  -5    0.67    0.22
  -5   4  -5    1.13    0.27
   5   4   5    0.70    0.21
   5   4   5    0.71    0.22
   6  -4   5    5.49    0.68
  -6  -4  -5    5.73    0.69
   6   4   5    4.87    0.59
  -6   4  -5    5.51    0.52
  -7  -4  -5    7.87    0.70
   7  -4   5    5.19    0.71
   7   4   5    7.10    0.65
  -7   4  -5    5.67    0.56
  -8  -4  -5    0.16    0.19
   8  -4   5   -0.02    0.18
  -8   4  -5    0.07    0.13
   8   4   5   -0.03    0.15
   9  -4   5    0.26    0.25
  -9  -4  -5    0.13    0.20
   9   4   5    0.06    0.18
  -9   4  -5   -0.21    0.13
 -10  -4  -5    0.11    0.23
  10  -4   5    0.17    0.27
  10   4   5    0.13    0.26
 -10   4  -5   -0.01    0.17
  11  -4   5    0.31    0.35
 -11  -4  -5    0.56    0.33
 -11   4  -5    0.96    0.32
  11   4   5    0.00    0.27
 -12  -5   5   -0.02    0.26
  12  -5  -5    0.33    0.34
  12   5  -5   -0.33    0.26
 -12   5   5    0.04    0.16
  11  -5  -5    0.27    0.29
 -11  -5   5   -0.04    0.22
 -11   5   5   -0.11    0.14
  11   5  -5   -0.16    0.26
 -10  -5   5    0.05    0.20
  10  -5  -5    0.02    0.24
  10   5  -5   -0.03    0.22
 -10   5   5    0.66    0.21
  -9  -5   5    0.08    0.20
   9  -5  -5   -0.09    0.21
  -9   5   5   -0.09    0.12
   9   5  -5    0.30    0.26
   9   5  -5    0.01    0.17
  -8  -5   5    0.30    0.17
   8  -5  -5    0.37    0.26
   8   5  -5    0.41    0.25
   8   5  -5    0.51    0.21
  -8   5   5    0.62    0.19
   7   5  -5    0.61    0.25
  -7   5   5    0.78    0.20
   7   5  -5    0.95    0.25
  -7   5   5    0.84    0.20
  -6   5   5    3.85    0.35
  -6   5   5    3.36    0.38
   6   5  -5    3.91    0.41
   6   5  -5    4.11    0.49
   6   5  -5    3.24    0.51
   5   5  -5    1.56    0.36
  -5   5   5    1.77    0.25
  -5   5   5    1.22    0.22
   5   5  -5    1.20    0.23
  -4   5   5    0.74    0.16
  -4   5   5    0.77    0.17
   4   5  -5    1.50    0.31
   4   5  -5    0.68    0.17
   3   5  -5    4.83    0.55
   3   5  -5    4.47    0.42
  -3   5   5    4.74    0.42
  -3   5   5    5.14    0.36
   2   5  -5    2.77    0.29
   2   5  -5    3.58    0.46
  -2   5   5    2.38    0.27
  -2   5   5    2.83    0.29
  -1   5   5    4.92    0.34
  -1   5   5    3.98    0.39
   1   5  -5    5.07    0.54
   1   5  -5    4.46    0.41
   0   5  -5    2.27    0.35
   0   5   5    1.20    0.20
   0   5   5    2.01    0.23
   0   5  -5    1.53    0.24
   1   5   5    1.15    0.21
   1   5   5    1.00    0.19
  -1   5  -5    1.78    0.31
  -1   5  -5    1.39    0.23
  -2   5  -5    0.69    0.17
  -2   5  -5    0.70    0.22
   2   5   5    0.34    0.13
   2   5   5    0.79    0.17
  -3  -5  -5   -0.01    0.04
   3  -5   5    0.01    0.04
  -3   5  -5    0.01    0.12
  -3   5  -5    0.00    0.03
   3   5   5    0.00    0.03
   3   5   5   -0.09    0.11
   3   5   5   -0.03    0.08
  -3   5  -5    0.09    0.09
   4   5   5    1.30    0.27
  -4   5  -5    1.45    0.29
   4   5   5    1.38    0.26
  -5  -5  -5    3.42    0.50
   5  -5   5    2.64    0.44
   5   5   5    3.53    0.47
  -5   5  -5    3.21    0.45
   6  -5   5   -0.03    0.13
  -6  -5  -5    0.15    0.17
   6   5   5    0.25    0.19
  -6   5  -5    0.08    0.15
   7  -5   5    0.09    0.19
  -7  -5  -5    0.19    0.20
  -7   5  -5    0.07    0.12
   7   5   5   -0.05    0.16
   8  -5   5    1.14    0.37
  -8  -5  -5    1.97    0.44
   8   5   5    0.37    0.26
  -8   5  -5    0.92    0.29
   9  -5   5    0.25    0.24
  -9  -5  -5    0.42    0.32
  -9   5  -5    0.58    0.27
   9   5   5    0.44    0.29
  10   6  -5    0.97    0.43
 -10   6   5    1.48    0.32
  -9   6   5    1.34    0.30
   9   6  -5    0.70    0.34
   9   6  -5    0.52    0.25
  -8   6   5    0.03    0.04
   8   6  -5    0.32    0.29
  -8   6   5    0.07    0.14
   8   6  -5    0.11    0.19
  -7   6   5    0.55    0.19
   7   6  -5    0.96    0.33
  -7   6   5    1.27    0.25
   7   6  -5    0.65    0.23
  -6   6   5    0.06    0.12
  -6   6   5    0.16    0.17
   6   6  -5   -0.09    0.11
   6   6  -5    0.07    0.09
  -6   6   5   -0.01    0.03
   6   6  -5    0.22    0.23
  -6   6   5    0.04    0.07
   6   6  -5    0.02    0.04
  -5   6   5    0.01    0.03
  -5   6   5    0.07    0.08
   5   6  -5    0.01    0.14
   5   6  -5    0.08    0.20
  -5   6   5    0.00    0.11
   5   6  -5    0.01    0.08
   5   6  -5    0.01    0.03
  -4   6   5    0.00    0.03
  -4   6   5   -0.01    0.07
   4   6  -5    0.04    0.17
   4   6  -5    0.01    0.03
  -4   6   5   -0.08    0.09
   4   6  -5   -0.02    0.06
  -3   6   5    0.71    0.17
   3   6  -5    0.46    0.14
   3   6  -5    0.65    0.25
  -2   6   5    0.82    0.18
   2   6  -5    0.50    0.25
   2   6  -5    0.65    0.16
  -2   6   5    0.58    0.14
   1   6  -5    5.63    0.52
   0   6   5    0.47    0.12
   0   6   5    0.73    0.17
   0   6  -5    1.09    0.25
   0   6  -5    0.47    0.14
   1   6   5    0.26    0.11
  -1   6  -5    0.40    0.17
  -1   6  -5    0.25    0.11
   1   6   5    0.43    0.14
   2   6   5    1.73    0.27
  -2   6  -5    1.74    0.32
  -2   6  -5    1.97    0.31
   2   6   5    1.98    0.31
  -3   6  -5    0.94    0.23
   3   6   5    0.68    0.20
   3   6   5    0.70    0.19
  -3   6  -5    1.02    0.26
   4   6   5    0.47    0.21
  -4   6  -5    0.24    0.17
   5   6   5    0.35    0.22
  -5   6  -5    0.29    0.20
   6   6   5    0.79    0.29
  -6   6  -5    0.94    0.27
   7   6   5    0.91    0.33
  -7   6  -5    1.12    0.29
   7   7  -5    0.39    0.20
  -7   7   5    0.88    0.24
   6   7  -5    0.27    0.16
  -6   7   5    0.17    0.11
  -5   7   5    0.06    0.08
  -5   7   5    0.03    0.04
   5   7  -5    0.19    0.11
   5   7  -5    0.43    0.19
   5   7  -5    0.01    0.04
   4   7  -5    0.00    0.04
   4   7  -5    0.30    0.17
  -4   7   5    0.08    0.09
   4   7  -5    0.12    0.09
  -4   7   5   -0.06    0.04
   3   7  -5    0.01    0.04
  -3   7   5    0.16    0.09
   3   7  -5    0.16    0.10
  -2   7   5    0.23    0.11
   2   7  -5    0.47    0.14
  -1   7   5    0.24    0.10
   1   7  -5    0.34    0.11
   0   7  -5    0.04    0.04
   0   7  -5    0.15    0.09
   0   7   5    0.00    0.03
   0   7   5    0.06    0.07
   1   7   5    0.27    0.11
  -1   7  -5    0.34    0.13
  -2   7  -5    0.13    0.10
   2   7   5    0.20    0.12
  -2   7  -5   -0.03    0.04
   2   7   5   -0.01    0.04
   3   7   5    0.00    0.04
   3   7   5    0.14    0.11
  -3   7  -5   -0.03    0.05
  -3   7  -5    0.05    0.10
  -4   7  -5    0.86    0.26
   4   7   5    1.16    0.31
  16   0  -6    0.20    0.37
 -16   0   6   -0.04    0.27
 -15   0   6    0.06    0.25
  15   0  -6   -0.03    0.29
 -14   0   6    1.44    0.39
  14   0  -6    1.51    0.50
 -13   0   6    0.13    0.24
  13   0  -6   -0.01    0.10
 -13   0   6   -0.01    0.05
  13   0  -6    0.07    0.34
 -12   0   6   -0.01    0.04
  12   0  -6   -0.10    0.24
 -12   0   6   -0.10    0.16
  12   0  -6   -0.02    0.09
  11   0  -6   -0.03    0.07
  11   0  -6    0.10    0.23
 -11   0   6    0.00    0.04
 -11   0   6    0.50    0.23
   8   0  -6    1.80    0.42
   8   0  -6    1.73    0.31
  -8   0   6    1.65    0.35
  -8   0   6    1.94    0.34
   7   0  -6   19.55    1.41
  -7   0   6   21.13    1.44
   7   0  -6   21.41    1.47
  -7   0   6   20.44    1.36
   7   0  -6   21.56    1.37
  -7   0   6   21.25    1.30
   6   0  -6   20.81    1.39
  -6   0   6   19.36    1.31
  -6   0   6   19.87    1.25
  -6   0   6   20.50    1.39
   6   0  -6   20.65    1.41
   6   0  -6   21.37    1.32
   5   0  -6    0.17    0.11
   5   0  -6    0.01    0.11
  -5   0   6    0.00    0.02
   5   0  -6    0.20    0.15
  -5   0   6    0.25    0.11
   5   0  -6    0.00    0.04
  -5   0   6    0.07    0.09
  -5   0   6    0.01    0.11
   4   0  -6   25.67    1.54
  -4   0   6   23.78    1.39
  -4   0   6   22.81    1.53
   4   0  -6   20.97    1.44
  -4   0   6   24.98    1.46
   4   0  -6   24.05    1.50
   3   0  -6   48.85    2.70
   3   0  -6   43.88    2.76
  -3   0   6   48.49    2.59
  -3   0   6   44.70    2.70
   3   0  -6   46.70    2.70
  -3   0   6   51.56    2.80
   2   0  -6   33.45    1.99
  -2   0   6   35.04    1.91
  -2   0   6   31.47    2.05
   2   0  -6   35.35    2.07
  -2   0   6   34.77    2.00
   2   0  -6   33.77    2.00
  -1   0   6   48.81    2.81
   1   0  -6   45.59    2.76
  -1   0   6   52.35    2.90
   1   0  -6   51.07    2.87
   1   0  -6   51.31    2.82
  -1   0   6   47.04    2.68
   0   0  -6   37.18    2.16
   0   0  -6   34.88    2.19
   0   0   6   36.78    2.10
   0   0   6   42.58    2.22
   0   0  -6   37.93    2.25
   0   0   6   36.91    2.27
   1   0   6    1.07    0.24
   1   0   6    0.99    0.19
  -1   0  -6    1.39    0.25
   1   0   6    1.37    0.23
  -1   0  -6    1.29    0.23
  -1   0  -6    1.13    0.24
  -2   0  -6    7.15    0.60
  -2   0  -6    7.47    0.63
  -2   0  -6    8.37    0.63
   2   0   6    7.19    0.57
   2   0   6    7.88    0.61
   2   0   6    6.62    0.63
  -3   0  -6    5.62    0.53
   3   0   6    6.04    0.58
  -3   0  -6    6.25    0.56
  -3   0  -6    5.82    0.54
   3   0   6    7.29    0.54
   3   0   6    6.33    0.56
   4   0   6    0.31    0.16
   4   0   6    0.52    0.18
  -4   0  -6    0.32    0.15
  -4   0  -6    0.18    0.11
  -4   0  -6    0.38    0.15
   4   0   6    0.16    0.13
   6   0   6   -0.02    0.04
  -6   0  -6   -0.01    0.04
   6   0   6    0.03    0.16
  -6   0  -6    0.07    0.12
  -8   0  -6    0.01    0.04
   8   0   6   -0.01    0.06
  -8   0  -6    0.06    0.17
   8   0   6   -0.10    0.12
  -9   0  -6    0.00    0.05
  -9   0  -6    0.18    0.27
   9   0   6   -0.01    0.08
   9   0   6    0.24    0.24
 -10   0  -6    3.55    0.64
  10   0   6    2.11    0.53
  11   0   6    2.59    0.60
 -11   0  -6    2.17    0.53
  12   0   6   -0.01    0.26
 -12   0  -6    0.18    0.27
 -13   0  -6    1.50    0.53
  13   0   6    0.61    0.41
 -16  -1   6   -0.10    0.24
  16  -1  -6    0.08    0.36
  16   1  -6   -0.02    0.37
 -16   1   6   -0.07    0.23
  16   1  -6    0.09    0.40
 -16   1   6    0.23    0.33
 -15  -1   6    1.47    0.41
  15  -1  -6    1.19    0.52
  15   1  -6    1.55    0.57
 -15   1   6    1.69    0.49
 -15   1   6    0.92    0.30
  15   1  -6    0.69    0.47
 -14  -1   6    0.20    0.28
  14  -1  -6   -0.16    0.25
 -14   1   6   -0.02    0.06
 -14   1   6    0.09    0.25
  14   1  -6   -0.26    0.30
  14   1  -6   -0.06    0.15
 -13  -1   6   -0.15    0.14
  13  -1  -6    0.17    0.24
  13   1  -6    0.05    0.24
 -13   1   6   -0.01    0.05
  13   1  -6   -0.02    0.10
 -13   1   6   -0.15    0.22
 -12  -1   6    1.39    0.39
  12  -1  -6    0.14    0.27
  12   1  -6   -0.02    0.08
 -12   1   6    1.11    0.33
  12   1  -6    0.51    0.30
 -11  -1   6    5.79    0.70
  11  -1  -6    4.60    0.79
  11   1  -6    4.34    0.72
 -11   1   6    5.75    0.67
  10  -1  -6    3.94    0.72
 -10  -1   6    5.28    0.63
 -10   1   6    4.93    0.58
  10   1  -6    4.03    0.66
   8  -1  -6   12.45    0.87
   8  -1  -6    9.75    0.92
  -8  -1   6   12.12    0.94
  -8  -1   6   12.25    0.85
  -8   1   6    9.78    0.78
  -8   1   6   11.24    0.88
   8   1  -6   10.87    0.92
  -7  -1   6    5.73    0.48
   7  -1  -6    4.79    0.47
   7  -1  -6    5.84    0.60
  -7  -1   6    5.44    0.51
   7  -1  -6    4.58    0.64
  -7  -1   6    4.48    0.57
  -7   1   6    4.74    0.48
   7   1  -6    4.94    0.49
   7   1  -6    5.51    0.68
  -7   1   6    6.56    0.60
   7   1  -6    5.84    0.67
  -7   1   6    5.60    0.47
  -6  -1   6    5.43    0.51
   6  -1  -6    4.92    0.50
  -6  -1   6    4.29    0.43
  -6  -1   6    4.63    0.41
   6  -1  -6    4.72    0.43
   6  -1  -6    4.39    0.59
   6   1  -6    4.11    0.46
   6   1  -6    4.24    0.58
   6   1  -6    4.15    0.42
  -6   1   6    4.43    0.43
  -6   1   6    3.97    0.39
   6   1  -6    4.93    0.51
   6   1  -6    4.45    0.43
  -6   1   6    3.61    0.43
   6   1  -6    4.96    0.47
  -6   1   6    4.28    0.45
  -6   1   6    3.46    0.49
   5  -1  -6    8.28    0.61
   5  -1  -6    7.07    0.65
  -5  -1   6    9.14    0.63
   5  -1  -6    7.31    0.67
  -5  -1   6    8.03    0.59
  -5  -1   6    7.37    0.64
  -5   1   6    7.94    0.56
  -5   1   6    7.01    0.65
  -5   1   6    7.61    0.65
   5   1  -6    7.38    0.60
   5   1  -6    8.88    0.67
   5   1  -6    7.24    0.67
   5   1  -6    7.25    0.65
   5   1  -6    7.27    0.64
  -5   1   6    7.06    0.59
   4  -1  -6   66.41    4.10
  -4  -1   6   76.37    3.95
  -4  -1   6   72.00    4.11
  -4  -1   6   74.80    4.20
  -4   1   6   73.32    4.62
   4   1  -6   80.44    4.07
   4   1  -6   78.51    4.64
  -4   1   6   74.83    4.63
  -4   1   6   73.02    4.20
   4   1  -6   70.63    4.19
  -4   1   6   73.39    4.12
  -4   1   6   77.60    3.94
   4   1  -6   70.15    4.11
   4   1  -6   69.44    4.61
  -3  -1   6   30.55    1.72
   3  -1  -6   29.62    1.78
  -3  -1   6   30.33    1.85
   3  -1  -6   29.59    1.85
  -3   1   6   29.66    1.78
  -3   1   6   28.34    1.98
   3   1  -6   28.49    1.78
  -3   1   6   32.03    1.88
   3   1  -6   28.42    1.85
   3   1  -6   31.23    1.98
   3   1  -6   31.95    1.81
   3   1  -6   29.65    1.99
  -3   1   6   29.71    1.69
  -3   1   6   30.63    1.97
   2  -1  -6    1.90    0.26
  -2  -1   6    1.66    0.24
   2  -1  -6    1.52    0.26
  -2  -1   6    1.85    0.28
  -2  -1   6    1.83    0.26
  -2   1   6    1.69    0.25
  -2   1   6    1.55    0.28
   2   1  -6    1.95    0.30
  -2   1   6    1.89    0.26
   2   1  -6    2.24    0.25
   2   1  -6    2.07    0.30
   2   1  -6    2.34    0.35
  -2   1   6    2.04    0.29
  -2   1   6    1.72    0.27
   2   1  -6    1.64    0.24
  -1  -1   6   20.07    1.26
   1  -1  -6   20.62    1.31
  -1  -1   6   19.40    1.32
   1  -1  -6   22.89    1.27
  -1   1   6   21.17    1.34
  -1   1   6   21.97    1.20
   1   1  -6   19.05    1.26
   1   1  -6   18.97    1.37
   1   1  -6   17.86    1.37
  -1   1   6   21.48    1.39
   1   1  -6   21.28    1.33
  -1   1   6   20.78    1.27
   1   1  -6   21.36    1.27
  -1   1   6   18.34    1.37
   0  -1  -6   36.87    2.25
   0  -1  -6   40.49    2.31
   0  -1   6   43.43    2.28
   0  -1   6   35.44    2.15
   0  -1   6   37.30    2.32
   0   1   6   38.87    2.33
   0   1  -6   41.00    2.23
   0   1  -6   39.61    2.33
   0   1  -6   37.85    2.54
   0   1  -6   38.68    2.27
   0   1   6   38.11    2.15
   0   1   6   38.92    2.27
   0   1  -6   39.26    2.51
   0   1   6   39.29    2.50
   0   1   6   38.01    2.52
  -1  -1  -6  110.57    5.63
   1  -1   6   97.01    5.37
   1  -1   6  103.77    5.62
  -1  -1  -6  104.49    5.66
   1  -1   6   94.79    5.66
   1   1   6  102.19    5.62
  -1   1  -6  101.43    5.43
  -1   1  -6  110.90    5.64
   1   1   6   95.51    5.36
   1   1   6  101.05    6.31
   1   1   6  114.69    5.73
  -1   1  -6   99.44    5.67
   1   1   6  102.96    6.32
  -1   1  -6   95.21    6.30
  -1   1  -6   91.32    6.28
  -2  -1  -6   11.66    0.78
   2  -1   6   10.03    0.78
   2  -1   6    9.03    0.72
  -2  -1  -6   11.00    0.74
  -2  -1  -6   11.94    0.79
   2  -1   6    9.64    0.71
  -2   1  -6   10.26    0.79
  -2   1  -6   10.89    0.79
   2   1   6    9.81    0.78
   2   1   6    8.40    0.71
  -2   1  -6    8.58    0.72
   2   1   6    9.95    0.80
   2   1   6    8.37    0.67
   2   1   6   10.15    0.79
  -2   1  -6   10.14    0.80
  -2   1  -6    9.67    0.73
  -3  -1  -6   11.41    0.85
  -3  -1  -6   11.50    0.87
  -3  -1  -6    9.86    0.83
   3  -1   6   12.30    0.85
   3  -1   6   11.76    0.87
   3  -1   6   12.79    0.93
  -3   1  -6   12.19    0.91
   3   1   6   12.38    0.93
  -3   1  -6   12.84    0.89
   3   1   6   12.91    0.94
   3   1   6   12.19    0.82
   3   1   6   10.95    0.86
  -3   1  -6   12.39    0.97
  -3   1  -6   12.32    0.86
   4  -1   6    1.37    0.27
   4  -1   6    1.43    0.30
  -4  -1  -6    0.90    0.26
  -4  -1  -6    0.74    0.20
  -4   1  -6    1.76    0.33
   4   1   6    1.01    0.25
   4   1   6    1.77    0.32
  -4   1  -6    1.58    0.31
  -5  -1  -6    7.57    0.67
  -5  -1  -6    7.84    0.69
   5  -1   6    7.43    0.71
   5  -1   6    8.79    0.70
  -5   1  -6    8.50    0.68
   5   1   6    7.12    0.64
   7  -1   6   34.42    2.07
  -7  -1  -6   31.85    2.00
  -7   1  -6   28.43    1.94
  -8  -1  -6    2.61    0.53
  -8   1  -6    3.99    0.59
   8   1   6    3.22    0.55
   9  -1   6   17.78    1.38
  -9  -1  -6   16.74    1.35
  -9   1  -6   17.80    1.34
   9   1   6   19.16    1.39
 -10  -1  -6    0.01    0.21
  10  -1   6    0.15    0.24
  10   1   6   -0.01    0.08
 -10   1  -6    0.00    0.05
  10   1   6   -0.06    0.20
 -10   1  -6   -0.02    0.21
  11  -1   6    0.57    0.35
 -11  -1  -6    0.99    0.38
 -11   1  -6    1.22    0.44
 -11   1  -6    1.31    0.36
  11   1   6    1.22    0.44
  11   1   6    0.42    0.32
 -12  -1  -6    0.88    0.38
  12  -1   6    1.44    0.50
  12   1   6    1.33    0.55
 -12   1  -6    1.07    0.35
 -12   1  -6    0.83    0.43
  12   1   6    0.23    0.38
 -13  -1  -6    0.15    0.34
  13  -1   6    0.01    0.38
  13   1   6    0.24    0.39
 -13   1  -6    0.03    0.30
  13   1   6    0.11    0.42
 -16  -2   6    0.32    0.36
  16  -2  -6   -0.19    0.30
  16   2  -6   -0.02    0.37
 -16   2   6   -0.09    0.23
 -15  -2   6    0.66    0.33
  15  -2  -6    1.80    0.57
  15   2  -6    1.30    0.53
 -15   2   6    2.12    0.46
  14  -2  -6    0.22    0.30
 -14  -2   6   -0.04    0.24
 -14   2   6   -0.04    0.18
  14   2  -6    0.32    0.36
 -13  -2   6    0.31    0.26
  13  -2  -6    0.62    0.38
 -13   2   6    0.56    0.24
  13   2  -6    0.44    0.33
  12  -2  -6    4.38    0.81
 -12  -2   6    5.82    0.77
 -11  -2   6    9.02    0.82
  11  -2  -6    8.85    1.12
  11   2  -6    9.69    0.93
  10  -2  -6    1.30    0.31
 -10  -2   6    1.24    0.35
  10   2  -6    1.53    0.40
 -10   2   6    1.29    0.29
  -9  -2   6    0.93    0.26
   9  -2  -6    0.59    0.19
   9   2  -6    0.40    0.19
  -9   2   6    0.40    0.18
   8  -2  -6    3.57    0.44
   8   2  -6    3.17    0.53
  -8   2   6    3.27    0.43
   7  -2  -6    0.02    0.05
   7  -2  -6    0.46    0.16
  -7  -2   6    0.10    0.13
  -7   2   6    0.20    0.14
   7   2  -6    0.47    0.18
   7   2  -6    0.30    0.14
   7   2  -6   -0.01    0.04
  -7   2   6    0.57    0.18
   7   2  -6    0.47    0.22
   6  -2  -6    0.48    0.15
  -6  -2   6    0.48    0.18
  -6   2   6    0.76    0.24
  -6   2   6    1.03    0.23
   6   2  -6    0.78    0.21
   6   2  -6    0.66    0.23
  -6   2   6    0.26    0.13
   6   2  -6    0.62    0.19
   6   2  -6    1.12    0.25
  -6   2   6    0.74    0.18
   5  -2  -6   38.17    2.18
  -5  -2   6   38.26    2.25
   5   2  -6   34.66    2.32
   5   2  -6   37.30    2.20
   5   2  -6   37.59    2.44
   5   2  -6   39.35    2.46
  -5   2   6   36.13    1.94
  -5   2   6   37.88    2.08
  -5   2   6   36.68    2.43
   5   2  -6   36.84    2.11
  -5   2   6   36.58    2.28
  -5   2   6   38.38    2.45
   5   2  -6   32.81    2.16
   4  -2  -6   10.00    0.75
  -4  -2   6   10.89    0.82
  -4   2   6   11.04    0.84
   4   2  -6   12.06    0.83
  -4   2   6   11.21    0.72
   4   2  -6   12.74    0.87
  -4   2   6   10.77    0.84
  -4   2   6   11.97    0.87
  -4   2   6   10.22    0.77
  -4   2   6   11.54    0.68
   4   2  -6   10.69    0.84
   4   2  -6   11.29    0.78
   4   2  -6   11.53    0.82
   4   2  -6    9.95    0.84
  -3  -2   6   46.33    2.70
   3  -2  -6   47.82    2.64
  -3   2   6   43.74    2.35
   3   2  -6   44.98    2.65
   3   2  -6   46.29    2.51
   3   2  -6   50.27    2.99
  -3   2   6   45.14    2.50
  -3   2   6   46.88    2.95
   3   2  -6   50.78    2.62
  -3   2   6   46.29    2.96
   3   2  -6   47.76    2.73
  -3   2   6   45.18    2.64
   3   2  -6   41.84    2.93
  -3   2   6   42.38    2.70
   2  -2  -6   17.24    1.04
  -2  -2   6   15.83    1.10
   2   2  -6   15.64    1.11
  -2   2   6   15.59    1.15
  -2   2   6   14.89    0.92
  -2   2   6   17.49    1.14
   2   2  -6   16.49    1.15
  -2   2   6   16.03    0.98
   2   2  -6   16.12    1.05
  -2   2   6   16.36    1.14
  -2   2   6   17.25    1.06
   2   2  -6   16.57    1.06
   2   2  -6   17.53    1.06
   1  -2  -6    9.51    0.68
  -1  -2   6   10.50    0.75
   1   2  -6   10.61    0.73
   1   2  -6    9.06    0.74
   1   2  -6    9.09    0.75
  -1   2   6   10.18    0.70
  -1   2   6    9.89    0.73
  -1   2   6    9.53    0.60
   1   2  -6   10.53    0.71
  -1   2   6    9.78    0.76
   1   2  -6    9.43    0.75
  -1   2   6    9.82    0.64
   0  -2   6    4.13    0.43
   0  -2  -6    4.39    0.39
   0   2  -6    5.01    0.45
   0   2   6    3.74    0.41
   0   2   6    3.87    0.39
   0   2   6    4.26    0.34
   0   2  -6    4.52    0.51
   0   2   6    4.69    0.46
   0   2  -6    4.57    0.41
   0   2  -6    5.03    0.42
   0   2  -6    4.57    0.41
   0   2  -6    4.57    0.46
   0   2   6    5.16    0.45
   0   2   6    4.89    0.38
  -1  -2  -6    9.92    0.71
   1  -2   6   10.09    0.77
  -1   2  -6    9.57    0.71
  -1   2  -6   10.56    0.79
  -1   2  -6   10.19    0.80
   1   2   6    9.52    0.78
  -1   2  -6   10.73    0.72
   1   2   6    9.71    0.77
   1   2   6   10.06    0.68
   1   2   6   11.25    0.79
   1   2   6    8.69    0.62
   1   2   6    9.91    0.78
  -1   2  -6    9.75    0.78
  -1   2  -6   10.54    0.75
  -2  -2  -6    8.89    0.67
   2  -2   6    9.52    0.75
   2   2   6    9.35    0.75
  -2   2  -6   10.57    0.79
  -2   2  -6    9.40    0.71
  -2   2  -6    8.46    0.73
   2   2   6    9.21    0.65
  -2   2  -6    7.14    0.63
  -2   2  -6    9.04    0.68
   2   2   6   10.12    0.78
   2   2   6    9.91    0.77
   3  -2   6    0.00    0.03
   3  -2   6   -0.01    0.03
  -3  -2  -6    0.37    0.14
  -3  -2  -6    0.01    0.04
  -3  -2  -6    0.00    0.03
   3  -2   6    0.11    0.12
   3   2   6   -0.01    0.03
  -3   2  -6    0.44    0.17
   3   2   6    0.24    0.15
  -3   2  -6    0.06    0.11
  -3   2  -6    0.00    0.03
   3   2   6    0.15    0.13
   3   2   6    0.00    0.09
   4  -2   6    5.90    0.59
   5  -2   6    0.72    0.26
  -5  -2  -6    0.73    0.20
  -5   2  -6    0.84    0.24
   5   2   6    0.99    0.29
   6  -2   6    1.32    0.31
  -6  -2  -6    1.49    0.31
   6   2   6    1.21    0.30
  -6   2  -6    1.03    0.27
  -7  -2  -6    2.13    0.42
   7  -2   6    2.25    0.44
  -7   2  -6    1.88    0.37
   7   2   6    1.80    0.38
  -8  -2  -6    2.85    0.51
  -9  -2  -6    2.11    0.48
   9  -2   6    2.06    0.49
   9   2   6    0.30    0.14
 -10  -2  -6    0.47    0.27
  10  -2   6    1.16    0.40
  10   2   6    1.15    0.42
 -10   2  -6    1.54    0.36
 -11  -2  -6    0.25    0.27
  11  -2   6    0.15    0.25
 -11   2  -6    0.23    0.22
  11   2   6    0.22    0.28
 -12  -2  -6    0.00    0.28
  12  -2   6    0.05    0.32
 -12   2  -6    0.37    0.29
  12   2   6    0.46    0.38
  15  -3  -6    0.00    0.32
 -15  -3   6    0.09    0.21
 -15   3   6    0.13    0.22
  15   3  -6    0.22    0.39
  14  -3  -6   -0.02    0.30
 -14  -3   6    0.19    0.24
 -14   3   6   -0.05    0.18
  14   3  -6   -0.43    0.29
 -13  -3   6    0.15    0.20
  13  -3  -6   -0.04    0.25
 -13   3   6    0.27    0.19
  13   3  -6   -0.06    0.25
 -12  -3   6    1.00    0.32
  12  -3  -6    0.61    0.36
  12   3  -6    0.35    0.32
 -12   3   6    0.93    0.28
 -11  -3   6    0.51    0.27
  11  -3  -6    0.59    0.32
  11   3  -6    0.08    0.10
  10  -3  -6    2.69    0.58
 -10  -3   6    2.68    0.48
  -9  -3   6    1.25    0.32
   9  -3  -6    1.68    0.33
  -9   3   6    1.45    0.28
   9   3  -6    2.03    0.44
   8  -3  -6    6.08    0.54
   8   3  -6    6.40    0.79
  -8   3   6    5.53    0.48
   8   3  -6    5.79    0.56
  -7  -3   6    2.14    0.36
   7  -3  -6    2.44    0.33
  -7   3   6    2.45    0.33
  -7   3   6    2.31    0.38
   7   3  -6    2.65    0.40
  -7   3   6    1.72    0.36
   7   3  -6    2.21    0.37
   7   3  -6    2.79    0.49
   6  -3  -6    0.03    0.05
   6  -3  -6    0.56    0.15
  -6  -3   6    0.29    0.15
   6   3  -6    0.27    0.14
  -6   3   6    0.75    0.20
   6   3  -6    0.69    0.21
  -6   3   6    0.70    0.19
   6   3  -6    0.49    0.17
   6   3  -6    0.20    0.19
  -6   3   6    0.49    0.15
   5  -3  -6    4.41    0.39
  -5  -3   6    4.37    0.44
   5   3  -6    5.04    0.48
  -5   3   6    5.07    0.48
  -5   3   6    4.65    0.46
   5   3  -6    5.84    0.65
  -5   3   6    4.27    0.36
   5   3  -6    4.85    0.48
  -4  -3   6    9.55    0.73
   4  -3  -6    9.91    0.68
  -4   3   6    9.84    0.62
   4   3  -6    9.14    0.71
   4   3  -6    9.58    0.75
   4   3  -6   10.71    0.81
   4   3  -6   10.41    0.79
  -4   3   6    9.87    0.77
  -4   3   6    9.48    0.77
  -4   3   6   10.42    0.81
  -3  -3   6    6.94    0.56
   3  -3  -6    6.64    0.50
  -3   3   6    6.47    0.56
   3   3  -6    6.30    0.57
  -3   3   6    6.52    0.57
  -3   3   6    6.65    0.46
   3   3  -6    6.45    0.54
  -3   3   6    7.15    0.62
   3   3  -6    7.06    0.58
   3   3  -6    7.59    0.61
  -2  -3   6    4.71    0.44
   2  -3  -6    4.72    0.39
  -2   3   6    4.56    0.43
   2   3  -6    4.43    0.42
  -2   3   6    4.92    0.46
  -2   3   6    5.03    0.37
   2   3  -6    5.23    0.46
   2   3  -6    5.07    0.59
   2   3  -6    4.79    0.45
  -2   3   6    5.36    0.50
   1  -3  -6   11.36    0.78
  -1  -3   6   11.56    0.85
   1   3  -6   12.28    0.90
  -1   3   6   12.06    0.72
   1   3  -6   10.80    0.82
   1   3  -6   12.21    0.92
  -1   3   6   12.55    0.92
   1   3  -6   13.04    0.85
  -1   3   6   12.37    0.89
  -1   3   6   12.69    0.91
   0  -3   6    7.31    0.61
   0  -3  -6    8.57    0.58
   0   3  -6    8.78    0.63
   0   3  -6    8.01    0.66
   0   3  -6    8.58    0.62
   0   3  -6    7.28    0.63
   0   3   6    8.71    0.65
   0   3   6    7.28    0.51
   0   3   6    7.23    0.66
   0   3   6    7.11    0.63
   1  -3   6    9.06    0.71
  -1  -3  -6    8.97    0.65
  -1   3  -6    9.14    0.74
  -1   3  -6   10.31    0.78
   1   3   6    9.91    0.75
   1   3   6    9.54    0.61
   1   3   6    8.88    0.74
  -1   3  -6    8.61    0.68
   2  -3   6    7.28    0.62
  -2  -3  -6    6.94    0.55
   2   3   6    7.26    0.63
  -2   3  -6    7.20    0.62
   2   3   6    7.10    0.63
   2   3   6    7.00    0.51
  -2   3  -6    7.23    0.58
  -2   3  -6    6.89    0.65
  -3  -3  -6   21.63    1.37
   3  -3   6   20.56    1.44
  -3   3  -6   21.82    1.57
  -3   3  -6   18.87    1.55
   3   3   6   23.66    1.56
   3   3   6   24.02    1.59
   3   3   6   22.68    1.28
  -3   3  -6   22.24    1.34
   4  -3   6   12.78    0.94
  -4  -3  -6   12.76    0.86
   4   3   6   11.53    0.94
  -4   3  -6   10.66    0.81
  -4   3  -6   11.20    0.97
   4   3   6   11.74    0.80
  -5  -3  -6    1.38    0.27
   5  -3   6    1.43    0.33
  -5   3  -6    1.42    0.31
   5   3   6    1.53    0.31
   6  -3   6    7.66    0.73
  -6  -3  -6    7.79    0.73
   6  -3   6   10.94    0.86
  -6  -3  -6    9.39    0.73
   6   3   6    5.47    0.70
   7  -3   6    4.03    0.65
  -7  -3  -6    2.76    0.49
  -8  -3  -6    2.29    0.46
  -8   3  -6    2.43    0.44
   8   3   6    3.06    0.54
   9  -3   6    0.02    0.20
  -9  -3  -6    0.08    0.20
  -9   3  -6   -0.28    0.14
   9   3   6   -0.20    0.17
  10  -3   6    1.38    0.47
 -10  -3  -6    0.41    0.29
  10   3   6    1.55    0.46
 -10   3  -6    1.04    0.31
 -11  -3  -6    0.38    0.32
  11  -3   6    0.23    0.27
 -11   3  -6    0.37    0.25
  11   3   6    0.23    0.30
 -14  -4   6    1.21    0.40
  14  -4  -6    0.91    0.46
 -14   4   6    1.31    0.36
  14   4  -6    1.15    0.48
 -13  -4   6    0.07    0.25
  13  -4  -6    0.16    0.35
  13   4  -6   -0.35    0.26
 -13   4   6    0.58    0.23
  12  -4  -6    2.38    0.64
 -12  -4   6    1.37    0.38
 -12   4   6    1.53    0.34
  12   4  -6    0.30    0.29
  11  -4  -6    0.03    0.23
 -11  -4   6    0.19    0.25
 -11   4   6    0.02    0.13
  11   4  -6    0.10    0.24
  10  -4  -6    0.04    0.26
 -10  -4   6    0.04    0.19
  10   4  -6   -0.02    0.19
 -10   4   6   -0.09    0.11
   9  -4  -6    1.08    0.35
  -9  -4   6    2.16    0.37
  -9   4   6    3.11    0.40
   9   4  -6    2.55    0.51
   8   4  -6    4.89    0.69
  -7   4   6    6.28    0.50
  -7   4   6    5.46    0.58
   7   4  -6    6.01    0.57
   7   4  -6    6.60    0.79
   7   4  -6    6.94    0.64
   6   4  -6    1.73    0.32
   6   4  -6    1.11    0.33
  -6   4   6    1.56    0.32
  -6   4   6    2.03    0.29
   6   4  -6    2.11    0.37
   6   4  -6    2.42    0.36
  -6   4   6    2.03    0.33
   5   4  -6    8.56    0.72
   4  -4  -6    4.37    0.33
  -4  -4   6    4.41    0.37
   4   4  -6    3.56    0.40
   4   4  -6    3.75    0.42
   4   4  -6    3.93    0.51
  -4   4   6    3.56    0.39
  -4   4   6    3.76    0.32
  -4   4   6    3.60    0.39
   3  -4  -6   19.83    1.17
  -3  -4   6   20.17    1.22
   3   4  -6   20.25    1.27
   3   4  -6   20.79    1.43
  -3   4   6   20.66    1.39
   3   4  -6   19.93    1.39
  -3   4   6   20.00    1.11
  -3   4   6   18.83    1.38
   2  -4  -6   17.57    1.04
  -2  -4   6   18.42    1.09
   2   4  -6   17.64    1.25
  -2   4   6   18.03    1.00
   2   4  -6   16.90    1.25
  -2   4   6   17.58    1.24
  -2   4   6   18.18    1.26
   2   4  -6   18.32    1.15
   1  -4  -6    3.60    0.29
  -1  -4   6    4.07    0.35
   1   4  -6    4.20    0.43
   1   4  -6    3.77    0.50
   1   4  -6    3.94    0.39
  -1   4   6    4.45    0.40
  -1   4   6    3.94    0.40
  -1   4   6    3.51    0.31
   0  -4   6    2.34    0.29
   0  -4  -6    2.78    0.24
   0   4  -6    2.77    0.40
   0   4   6    2.48    0.28
   0   4   6    1.99    0.30
   0   4  -6    2.77    0.39
   0   4   6    2.82    0.31
   0   4  -6    2.69    0.31
   1  -4   6    0.30    0.14
  -1   4  -6    0.29    0.17
   1   4   6    0.28    0.11
  -1   4  -6    0.41    0.16
   1   4   6    0.55    0.16
  -1   4  -6    0.40    0.15
   1   4   6    0.33    0.14
   2   4   6    2.13    0.34
  -2   4  -6    1.81    0.32
   2   4   6    2.08    0.33
   2   4   6    1.75    0.26
  -2   4  -6    1.61    0.31
   3   4   6    1.02    0.23
   3   4   6    0.51    0.18
  -3   4  -6    0.66    0.22
  -3   4  -6    0.55    0.20
   3   4   6    0.50    0.20
   4  -4   6    0.00    0.04
  -4  -4  -6    0.00    0.04
  -4   4  -6   -0.06    0.13
   4   4   6    0.05    0.13
  -4   4  -6    0.20    0.16
   4   4   6    0.02    0.07
  -5  -4  -6   12.89    1.01
   5  -4   6   14.30    1.04
  -5   4  -6   13.74    0.97
   5   4   6   14.72    0.97
   6  -4   6    1.63    0.40
  -6  -4  -6    1.09    0.29
  -6   4  -6    0.85    0.26
   6   4   6    1.08    0.28
  -7  -4  -6    0.57    0.25
   7   4   6    0.48    0.22
  -7   4  -6    0.78    0.28
   8  -4   6    1.39    0.41
  -8  -4  -6    1.48    0.40
  -8   4  -6    1.53    0.33
   8   4   6    0.65    0.28
   9  -4   6    0.12    0.25
  -9  -4  -6    0.15    0.22
  -9   4  -6   -0.01    0.15
   9   4   6   -0.24    0.19
 -10  -4  -6    0.32    0.30
  10  -4   6    0.04    0.24
  10   4   6    0.60    0.36
 -10   4  -6    0.24    0.23
  12  -5  -6    0.05    0.32
 -12  -5   6   -0.21    0.21
  12   5  -6   -0.08    0.25
 -12   5   6    0.02    0.15
  11  -5  -6    0.74    0.35
 -11  -5   6    0.39    0.27
 -11   5   6    0.98    0.28
  11   5  -6    0.43    0.33
 -10  -5   6    0.00    0.18
  10  -5  -6   -0.05    0.21
 -10   5   6   -0.07    0.13
  10   5  -6   -0.06    0.25
  -9  -5   6    0.52    0.24
   9  -5  -6    0.25    0.25
  -9   5   6    0.43    0.16
   9   5  -6    0.43    0.28
   8  -5  -6    1.41    0.38
  -8   5   6    1.47    0.28
   8   5  -6    1.43    0.39
   8   5  -6    1.62    0.34
  -7  -5   6    0.83    0.24
   7   5  -6    0.92    0.34
   7   5  -6    1.24    0.30
  -7   5   6    0.93    0.21
  -6  -5   6    0.00    0.05
   6  -5  -6    0.04    0.07
  -6   5   6    0.29    0.13
  -6   5   6    0.01    0.03
   6   5  -6    0.23    0.18
   6   5  -6    0.12    0.10
   6   5  -6    0.01    0.04
   6   5  -6   -0.02    0.20
  -6   5   6    0.22    0.12
   5   5  -6    1.41    0.27
  -5   5   6    1.33    0.23
  -5   5   6    1.22    0.24
   5   5  -6    1.30    0.33
  -4  -5   6    0.08    0.04
  -4   5   6    0.12    0.11
   4   5  -6   -0.02    0.08
  -4   5   6    0.13    0.09
   4   5  -6    0.08    0.20
  -4   5   6   -0.01    0.03
   4   5  -6   -0.01    0.03
   3   5  -6    3.02    0.34
   3   5  -6    3.41    0.50
  -3   5   6    3.20    0.35
  -3   5   6    3.34    0.30
  -2   5   6   16.79    1.27
   2   5  -6   18.38    1.29
  -2   5   6   19.56    1.05
   2   5  -6   18.91    1.19
   0   5   6    2.79    0.32
   0   5  -6    2.86    0.32
   0   5  -6    3.37    0.45
   0   5   6    2.79    0.32
   1  -5   6   -0.02    0.04
  -1  -5  -6   -0.02    0.05
  -1   5  -6   -0.02    0.03
  -1   5  -6    0.16    0.09
  -1   5  -6    0.11    0.17
   1   5   6    0.07    0.08
   1   5   6    0.12    0.11
   1   5   6    0.01    0.03
  -2   5  -6    1.57    0.31
   2   5   6    1.48    0.27
  -2   5  -6    1.20    0.25
   2   5   6    1.06    0.21
   3   5   6    3.45    0.51
  -3   5  -6    4.26    0.51
   4  -5   6    3.98    0.53
  -4  -5  -6    3.14    0.49
  -4   5  -6    3.75    0.49
   4   5   6    3.60    0.44
  -5  -5  -6    0.43    0.20
   5  -5   6    1.38    0.34
  -5   5  -6    1.00    0.28
   5   5   6    0.88    0.24
  -6  -5  -6    0.53    0.26
  -6   5  -6    0.78    0.26
   6   5   6    0.83    0.26
  -7  -5  -6    0.01    0.20
   7  -5   6    0.50    0.25
  -7   5  -6    0.28    0.18
   7   5   6    0.12    0.19
   8  -5   6    0.47    0.29
  -8  -5  -6    0.19    0.24
   8   5   6    0.73    0.30
  -8   5  -6    0.41    0.22
   9  -5   6    1.04    0.39
  -9  -5  -6    0.55    0.34
  -9   5  -6    0.31    0.21
   9   5   6    0.61    0.30
 -10   6   6    0.69    0.23
  10   6  -6    0.60    0.35
   9   6  -6    0.13    0.19
  -9   6   6    0.24    0.17
   9   6  -6    0.36    0.30
   8   6  -6    0.05    0.28
   8   6  -6    0.00    0.15
  -8   6   6   -0.02    0.15
  -8   6   6   -0.02    0.05
  -7   6   6    0.58    0.19
   7   6  -6    0.51    0.20
   7   6  -6    0.48    0.30
  -6   6   6    0.89    0.21
  -6   6   6    0.72    0.20
   6   6  -6    1.04    0.35
   6   6  -6    0.93    0.28
   5   6  -6    0.62    0.29
  -5   6   6    0.52    0.16
  -5   6   6    0.69    0.19
   5   6  -6    0.54    0.18
  -4   6   6    1.16    0.22
   4   6  -6    1.04    0.32
   4   6  -6    0.99    0.23
  -4   6   6    1.21    0.23
  -3   6   6    0.47    0.14
   3   6  -6    0.22    0.11
   3   6  -6    0.22    0.22
  -3   6   6    0.34    0.12
   2   6  -6    0.06    0.04
  -2   6   6    0.07    0.08
   2   6  -6    0.05    0.18
   2   6  -6    0.07    0.08
  -2   6   6    0.02    0.03
  -2   6   6    0.17    0.11
   1   6  -6   -0.12    0.13
  -1   6   6    0.03    0.06
   1   6  -6    0.01    0.06
   1   6  -6    0.02    0.03
  -1   6   6    0.04    0.09
  -1   6   6   -0.01    0.03
   0   6  -6    0.22    0.18
   0   6   6    0.30    0.13
   0   6  -6    0.02    0.04
   0   6  -6    0.17    0.10
   0   6   6    0.04    0.08
  -1   6  -6    0.26    0.13
  -1   6  -6    0.31    0.18
   1   6   6    0.17    0.13
   1   6   6    0.05    0.09
  -2   6  -6    0.09    0.17
  -2   6  -6    0.10    0.09
   2   6   6    0.12    0.13
   2   6   6    0.09    0.10
   2   6   6    0.00    0.03
  -2   6  -6   -0.01    0.04
  -3   6  -6    0.02    0.16
  -3   6  -6    0.00    0.05
   3   6   6    0.01    0.04
   3   6   6    0.00    0.15
  -4   6  -6    1.52    0.33
   4   6   6    1.81    0.35
   5   6   6    1.48    0.35
  -5   6  -6    2.46    0.43
   6   6   6    0.14    0.19
  -6   6  -6    0.52    0.24
   7   6   6    0.05    0.21
  -6   7   6   -0.20    0.13
   6   7  -6    0.00    0.05
   6   7  -6    0.08    0.29
  -6   7   6   -0.01    0.04
  -6   7   6   -0.04    0.10
   6   7  -6   -0.07    0.13
   5   7  -6   -0.14    0.15
   5   7  -6   -0.04    0.04
  -5   7   6   -0.02    0.04
   5   7  -6    0.02    0.08
  -5   7   6    0.08    0.10
  -4   7   6    0.02    0.04
   4   7  -6   -0.02    0.04
   4   7  -6    0.03    0.08
  -4   7   6    0.13    0.10
  -3   7   6    0.86    0.19
   3   7  -6    0.92    0.20
   2   7  -6    0.83    0.20
   1   7  -6    0.22    0.11
  -1   7   6    0.09    0.09
   1   7  -6    0.07    0.05
  -1   7   6   -0.01    0.03
   0   7  -6   -0.02    0.05
   0   7  -6    0.17    0.11
   0   7   6    0.19    0.12
   1   7   6    0.35    0.15
  -1   7  -6    0.80    0.21
   2   7   6    0.03    0.11
   2   7   6    0.02    0.04
  -2   7  -6   -0.04    0.05
   3   7   6    0.12    0.20
  16   0  -7    0.13    0.40
 -16   0   7   -0.02    0.31
  15   0  -7    0.50    0.37
 -15   0   7    0.65    0.32
 -14   0   7   -0.13    0.22
  14   0  -7   -0.10    0.30
 -13   0   7    1.10    0.38
  13   0  -7    2.45    0.64
  12   0  -7    4.57    0.77
 -12   0   7    5.48    0.67
  11   0  -7    0.02    0.09
  11   0  -7    0.61    0.30
 -11   0   7   -0.03    0.04
 -11   0   7    0.20    0.20
  -9   0   7    0.17    0.14
  -9   0   7   -0.03    0.03
   9   0  -7    0.01    0.07
   9   0  -7   -0.08    0.14
  -7   0   7   20.23    1.38
  -7   0   7   18.20    1.26
   7   0  -7   19.86    1.28
  -7   0   7   18.24    1.21
   7   0  -7   17.79    1.34
   6   0  -7    0.50    0.16
  -6   0   7    0.50    0.17
  -6   0   7    0.89    0.26
   6   0  -7    1.15    0.32
  -6   0   7    0.76    0.21
   6   0  -7    0.52    0.21
   5   0  -7    1.26    0.28
  -5   0   7    1.39    0.25
  -5   0   7    1.29    0.24
   5   0  -7    1.08    0.28
  -5   0   7    1.14    0.28
   5   0  -7    1.65    0.28
  -4   0   7    1.16    0.22
  -4   0   7    0.70    0.18
  -4   0   7    0.82    0.23
   4   0  -7    0.58    0.22
   4   0  -7    1.04    0.21
   4   0  -7    0.55    0.21
  -3   0   7   55.35    3.16
   3   0  -7   51.28    3.11
  -3   0   7   54.04    3.00
   3   0  -7   55.76    3.16
  -3   0   7   57.12    3.25
   3   0  -7   56.35    3.24
  -2   0   7    1.60    0.25
   2   0  -7    1.64    0.25
   2   0  -7    1.43    0.29
  -2   0   7    2.09    0.35
  -2   0   7    1.56    0.26
   2   0  -7    1.33    0.29
   1   0  -7    1.30    0.24
   1   0  -7    1.60    0.31
  -1   0   7    1.50    0.30
  -1   0   7    1.01    0.20
  -1   0   7    1.34    0.24
   1   0  -7    1.47    0.27
   0   0   7   43.71    2.56
   0   0  -7   43.47    2.61
   0   0   7   42.45    2.63
   0   0   7   44.70    2.45
   0   0  -7   42.37    2.55
   0   0  -7   45.99    2.53
   1   0   7    9.24    0.69
  -1   0  -7    9.24    0.77
  -1   0  -7   11.17    0.78
  -1   0  -7   10.80    0.76
   1   0   7    9.13    0.73
   1   0   7   10.21    0.81
   2   0   7   61.33    3.34
   2   0   7   55.11    3.18
  -2   0  -7   59.56    3.33
  -2   0  -7   54.81    3.36
   2   0   7   56.66    3.40
  -2   0  -7   57.03    3.24
  -3   0  -7   11.13    0.85
   3   0   7   11.82    0.92
  -3   0  -7   11.54    0.85
   3   0   7   11.35    0.90
   3   0   7    9.72    0.79
   4   0   7    3.88    0.50
  -4   0  -7    3.31    0.49
  -6   0  -7    0.34    0.19
   6   0   7    0.71    0.26
  -8   0  -7    3.10    0.55
  -9   0  -7    7.93    0.97
   9   0   7    8.71    1.03
  10   0   7    4.13    0.72
 -10   0  -7    5.52    0.83
 -11   0  -7    0.01    0.25
  11   0   7    0.01    0.27
  12   0   7    0.76    0.40
 -12   0  -7    1.42    0.50
 -16  -1   7    0.87    0.41
  16  -1  -7    0.69    0.45
 -16   1   7    0.85    0.44
  16   1  -7    0.43    0.46
 -16   1   7    1.30    0.39
  16   1  -7    1.39    0.63
  15  -1  -7    0.84    0.50
 -15  -1   7    1.24    0.41
 -15   1   7    0.35    0.32
  15   1  -7    0.57    0.41
 -15   1   7    0.37    0.23
  15   1  -7    0.03    0.33
 -14  -1   7    1.30    0.41
  14  -1  -7    0.94    0.43
 -14   1   7    1.65    0.43
 -14   1   7    0.75    0.24
  14   1  -7    0.55    0.34
  14   1  -7    0.97    0.54
  13  -1  -7    1.84    0.57
 -13  -1   7    2.21    0.47
 -13   1   7    1.15    0.39
  13   1  -7    2.07    0.55
 -12  -1   7    5.70    0.73
  12  -1  -7    4.58    0.80
 -12   1   7    5.71    0.69
  12   1  -7    6.09    0.89
 -11  -1   7    6.36    0.65
  11  -1  -7    7.36    1.00
 -11   1   7    7.27    0.64
  11   1  -7    5.30    0.84
 -10  -1   7    6.64    0.63
  10  -1  -7    6.25    0.89
 -10   1   7    6.69    0.61
  10   1  -7    7.38    0.93
   9  -1  -7   10.53    0.97
  -8  -1   7   10.87    0.90
   8  -1  -7   11.29    0.96
  -8  -1   7   10.68    0.80
   8  -1  -7   10.32    0.81
  -8   1   7    9.55    0.77
   8   1  -7   10.55    0.91
  -7  -1   7   11.73    0.86
   7  -1  -7   12.22    0.88
  -7  -1   7   12.20    0.95
   7  -1  -7   11.58    0.98
   7   1  -7   10.20    0.95
  -7   1   7   12.58    0.85
   7   1  -7   10.97    0.94
  -7   1   7   11.85    0.89
  -6  -1   7    7.85    0.69
  -6  -1   7    7.41    0.60
  -6  -1   7    7.22    0.62
   6  -1  -7    7.27    0.61
   6  -1  -7    6.56    0.81
   6  -1  -7    8.07    0.71
  -6   1   7    8.15    0.65
  -6   1   7    8.19    0.60
  -6   1   7    6.95    0.69
   6   1  -7    7.42    0.63
   6   1  -7    7.71    0.70
   6   1  -7    7.56    0.71
   5  -1  -7    9.15    0.82
   5  -1  -7    9.46    0.74
   5  -1  -7    8.24    0.78
  -5  -1   7   10.65    0.83
  -5  -1   7    9.32    0.71
  -5  -1   7   10.78    0.76
  -5   1   7    8.23    0.79
   5   1  -7   11.26    0.83
   5   1  -7   10.64    0.82
  -5   1   7   11.31    0.78
   5   1  -7    8.71    0.73
   5   1  -7    9.70    0.82
  -5   1   7   11.50    0.83
  -5   1   7    9.36    0.82
  -5   1   7   11.45    0.73
  -4  -1   7   11.73    0.77
  -4  -1   7   11.01    0.86
   4  -1  -7   10.87    0.86
   4  -1  -7   12.63    0.81
   4  -1  -7   10.58    0.85
   4   1  -7   10.90    0.86
   4   1  -7   10.72    0.86
   4   1  -7   10.77    0.83
  -4   1   7   11.27    0.74
   4   1  -7   11.68    0.80
   4   1  -7   10.36    0.85
  -4   1   7   10.19    0.78
  -4   1   7   10.42    0.86
  -4   1   7   10.21    0.84
  -4   1   7   10.22    0.86
  -3  -1   7   17.53    1.18
   3  -1  -7   21.11    1.26
   3  -1  -7   20.82    1.34
  -3  -1   7   19.15    1.32
   3  -1  -7   19.64    1.31
   3   1  -7   18.99    1.39
   3   1  -7   21.27    1.31
   3   1  -7   19.03    1.36
  -3   1   7   19.47    1.33
   3   1  -7   18.76    1.33
  -3   1   7   18.94    1.36
  -3   1   7   17.91    1.17
  -3   1   7   22.24    1.28
   3   1  -7   18.99    1.25
  -3   1   7   20.38    1.39
   2  -1  -7   50.28    3.10
  -2  -1   7   62.51    3.26
   2  -1  -7   52.50    3.13
  -2  -1   7   50.00    3.12
   2  -1  -7   52.78    3.19
  -2  -1   7   52.12    3.00
   2   1  -7   52.50    3.22
  -2   1   7   59.38    3.16
   2   1  -7   55.13    3.15
   2   1  -7   52.24    3.52
  -2   1   7   59.22    3.01
  -2   1   7   56.08    3.25
   2   1  -7   58.96    3.51
  -2   1   7   55.85    3.51
   2   1  -7   55.84    3.10
  -1  -1   7    6.36    0.48
   1  -1  -7    4.72    0.45
   1  -1  -7    6.55    0.55
  -1  -1   7    5.27    0.53
   1  -1  -7    5.51    0.52
  -1  -1   7    5.35    0.48
   1   1  -7    6.08    0.50
  -1   1   7    7.00    0.52
   1   1  -7    6.87    0.54
   1   1  -7    4.72    0.47
  -1   1   7    5.29    0.50
   1   1  -7    4.51    0.47
  -1   1   7    4.65    0.50
  -1   1   7    6.05    0.56
   1   1  -7    5.87    0.54
  -1   1   7    5.43    0.45
   0  -1  -7   16.43    1.08
   0  -1  -7   15.69    1.05
   0  -1   7   15.77    1.01
   0  -1   7   16.81    1.13
   0  -1   7   14.83    1.04
   0  -1  -7   18.62    1.13
   0   1  -7   16.27    1.06
   0   1   7   15.21    0.98
   0   1   7   16.34    1.14
   0   1  -7   14.39    1.04
   0   1  -7   15.29    1.10
   0   1  -7   14.13    1.14
   0   1  -7   17.66    1.19
   0   1   7   14.36    1.14
   0   1   7   14.59    1.11
   0   1   7   15.76    1.05
  -1  -1  -7   12.79    0.93
   1  -1   7   13.72    0.91
  -1  -1  -7   11.80    0.88
   1  -1   7   13.07    0.87
  -1  -1  -7   12.28    0.93
   1  -1   7   12.87    0.96
  -1   1  -7   13.61    0.92
   1   1   7   11.83    0.95
  -1   1  -7   12.92    0.96
  -1   1  -7   12.41    0.90
   1   1   7   13.53    0.92
  -1   1  -7   11.93    0.97
   1   1   7   11.65    0.94
   1   1   7   13.60    0.86
   1   1   7   12.80    0.99
   2  -1   7    8.24    0.69
  -2  -1  -7    6.68    0.60
  -2  -1  -7    6.73    0.64
  -2  -1  -7    8.43    0.68
   2  -1   7    8.71    0.64
   2  -1   7    7.15    0.63
  -2   1  -7    6.89    0.63
  -2   1  -7    8.03    0.69
   2   1   7    7.56    0.60
   2   1   7    9.11    0.67
   2   1   7    7.77    0.68
  -2   1  -7    7.23    0.62
   2   1   7    8.19    0.72
   3  -1   7    6.84    0.64
   3  -1   7    7.12    0.59
  -3  -1  -7    6.22    0.59
  -3  -1  -7    5.54    0.55
   3   1   7    5.98    0.59
  -3   1  -7    7.23    0.60
  -3   1  -7    6.92    0.63
   3   1   7    5.65    0.53
   4  -1   7    1.65    0.33
   4  -1   7    2.17    0.39
  -4  -1  -7    1.54    0.34
  -4  -1  -7    1.41    0.27
  -4   1  -7    2.01    0.37
   4   1   7    2.09    0.36
  -5  -1  -7    0.34    0.20
   5  -1   7    0.66    0.24
  -5   1  -7    1.24    0.31
   5   1   7    0.96    0.28
   6  -1   7    1.30    0.35
  -6  -1  -7    1.35    0.34
   6   1   7    1.10    0.32
  -6   1  -7    1.35    0.34
   7  -1   7    6.36    0.80
  -7  -1  -7    5.79    0.75
   7   1   7    4.97    0.69
  -7   1  -7    5.33    0.70
   8  -1   7    0.14    0.27
  -8  -1  -7    0.36    0.25
   8   1   7    0.12    0.15
  -8   1  -7    0.00    0.05
  -8   1  -7    0.55    0.22
   8   1   7    0.02    0.06
  -9  -1  -7    0.98    0.33
   9  -1   7    1.76    0.46
  -9   1  -7    2.55    0.54
   9   1   7    1.48    0.42
  10  -1   7    0.50    0.31
 -10  -1  -7    0.50    0.31
  10   1   7    0.50    0.35
 -10   1  -7    0.02    0.17
 -10   1  -7    0.09    0.28
  10   1   7    0.75    0.38
 -11  -1  -7    1.07    0.41
  11  -1   7    1.79    0.54
 -11   1  -7    1.03    0.42
  11   1   7    1.14    0.46
  11   1   7    1.02    0.47
 -11   1  -7    0.84    0.29
  12  -1   7    0.13    0.33
 -12  -1  -7   -0.06    0.25
  12   1   7    0.71    0.42
  12   1   7    0.22    0.41
 -12   1  -7    0.20    0.27
 -12   1  -7    0.08    0.35
  16  -2  -7    0.29    0.46
 -16  -2   7    0.07    0.27
 -16   2   7    0.06    0.25
  16   2  -7    0.03    0.41
  15  -2  -7    0.16    0.36
 -15  -2   7    0.04    0.27
  15   2  -7    0.20    0.36
 -15   2   7   -0.09    0.20
  14  -2  -7    0.45    0.41
 -14  -2   7   -0.01    0.21
  14   2  -7    0.39    0.35
 -14   2   7   -0.04    0.17
 -13  -2   7    0.00    0.22
  13  -2  -7    0.11    0.26
 -13   2   7   -0.17    0.13
  13   2  -7    0.19    0.29
 -12  -2   7   -0.24    0.14
  12  -2  -7    0.37    0.35
  12   2  -7   -0.02    0.09
 -12   2   7   -0.02    0.05
  11  -2  -7    1.25    0.43
 -11  -2   7    1.24    0.35
  11   2  -7    1.73    0.45
  10   2  -7    4.22    0.67
 -10   2   7    4.72    0.67
  -9  -2   7    3.52    0.53
   9  -2  -7    2.80    0.42
   9   2  -7    2.46    0.52
  -9   2   7    3.12    0.45
  -8  -2   7    0.97    0.28
   8  -2  -7    1.20    0.27
   8   2  -7    1.53    0.39
  -8   2   7    1.22    0.26
  -6  -2   7    4.95    0.52
  -5  -2   7    1.38    0.29
   5  -2  -7    1.02    0.22
  -5   2   7    1.34    0.27
  -5   2   7    1.62    0.25
   5   2  -7    0.77    0.21
   5   2  -7    1.06    0.30
  -5   2   7    1.36    0.26
   5   2  -7    1.41    0.28
  -4  -2   7    4.12    0.49
   4  -2  -7    3.10    0.34
  -4   2   7    3.30    0.38
   4   2  -7    3.70    0.53
   4   2  -7    3.17    0.36
  -4   2   7    3.60    0.48
  -4   2   7    3.16    0.37
  -4   2   7    3.18    0.30
   4   2  -7    3.33    0.39
  -4   2   7    3.14    0.31
   4   2  -7    2.96    0.44
   4   2  -7    2.72    0.40
   3  -2  -7    8.07    0.65
  -3  -2   7    9.11    0.74
   3   2  -7    8.24    0.69
   3   2  -7    8.99    0.73
  -3   2   7    9.75    0.64
  -3   2   7    8.89    0.75
  -3   2   7    9.23    0.60
  -3   2   7    9.41    0.76
   3   2  -7    8.00    0.70
  -3   2   7    9.64    0.75
   3   2  -7    9.99    0.70
   3   2  -7    9.03    0.76
   3   2  -7    9.76    0.82
   2  -2  -7    3.62    0.36
  -2  -2   7    4.43    0.44
   2   2  -7    3.60    0.43
   2   2  -7    4.18    0.50
  -2   2   7    3.91    0.49
   2   2  -7    3.88    0.52
   2   2  -7    3.79    0.38
  -2   2   7    3.78    0.32
   2   2  -7    4.25    0.52
  -2   2   7    3.85    0.42
   2   2  -7    3.46    0.39
  -2   2   7    3.71    0.39
  -2   2   7    3.68    0.34
  -1  -2   7   21.96    1.55
   1  -2  -7   23.58    1.50
  -1   2   7   23.78    1.67
   1   2  -7   26.11    1.66
  -1   2   7   22.70    1.64
   1   2  -7   25.41    1.68
   1   2  -7   26.28    1.55
  -1   2   7   25.57    1.62
   1   2  -7   23.89    1.49
   1   2  -7   24.72    1.48
  -1   2   7   26.23    1.44
  -1   2   7   24.41    1.34
   1   2  -7   24.46    1.69
   0  -2   7    4.53    0.50
   0  -2  -7    5.81    0.48
   0   2   7    5.90    0.54
   0   2   7    6.04    0.52
   0   2   7    5.34    0.55
   0   2  -7    5.44    0.50
   0   2  -7    3.39    0.51
   0   2  -7    5.15    0.48
   0   2  -7    5.13    0.53
   0   2   7    5.53    0.45
   0   2   7    5.92    0.42
   0   2  -7    5.38    0.49
   1  -2   7    1.39    0.30
  -1  -2  -7    1.54    0.25
   1   2   7    1.43    0.29
   1   2   7    1.50    0.26
   1   2   7    1.62    0.27
  -1   2  -7    1.29    0.27
  -1   2  -7    1.45    0.30
  -1   2  -7    1.76    0.32
   2  -2   7    6.68    0.63
  -2  -2  -7    7.48    0.59
  -2   2  -7    7.14    0.59
   2   2   7    6.81    0.62
   2   2   7    7.24    0.56
  -2   2  -7    6.26    0.63
   6  -2   7    3.87    0.60
  -6  -2  -7    4.93    0.65
  -6   2  -7    5.96    0.56
  -7  -2  -7    0.88    0.33
   7  -2   7    1.32    0.40
   8  -2   7    0.59    0.34
  -8  -2  -7    1.28    0.38
   9  -2   7    0.06    0.22
  -9  -2  -7    0.28    0.24
   9   2   7   -0.04    0.26
  -9   2  -7    0.06    0.17
  10  -2   7    0.30    0.27
 -10  -2  -7    0.67    0.33
 -10   2  -7    1.03    0.32
  10   2   7    0.87    0.40
  11  -2   7    0.62    0.37
 -11  -2  -7    0.12    0.25
 -11   2  -7    0.23    0.25
  11   2   7    0.60    0.39
  12   2   7   -0.06    0.35
 -12   2  -7    0.19    0.22
  15  -3  -7    0.16    0.31
 -15  -3   7    0.16    0.30
  15   3  -7    0.27    0.41
 -15   3   7    0.21    0.24
  14  -3  -7   -0.16    0.28
 -14  -3   7    0.08    0.23
  14   3  -7    0.17    0.35
 -14   3   7    0.01    0.16
  13  -3  -7    0.18    0.28
 -13  -3   7    0.10    0.25
  13   3  -7    0.11    0.33
 -13   3   7   -0.02    0.18
  12  -3  -7    0.71    0.39
 -12  -3   7    1.58    0.39
 -12   3   7    1.37    0.32
  12   3  -7    1.74    0.54
 -11  -3   7    1.69    0.36
  11   3  -7    2.13    0.56
 -11   3   7    2.99    0.45
  10  -3  -7    4.84    0.78
 -10  -3   7    4.37    0.59
  -9  -3   7    0.66    0.20
   9  -3  -7    2.15    0.34
   8  -3  -7    1.51    0.28
  -8  -3   7    1.74    0.34
   8   3  -7    1.33    0.40
  -8   3   7    1.31    0.27
   7  -3  -7    1.79    0.30
  -7  -3   7    2.28    0.38
   7   3  -7    1.90    0.43
   7   3  -7    2.08    0.38
  -7   3   7    1.83    0.35
  -7   3   7    2.60    0.34
   6  -3  -7   14.36    1.01
  -6  -3   7   16.12    1.11
  -6   3   7   15.67    1.16
  -6   3   7   14.26    1.13
   6   3  -7   17.09    1.15
  -6   3   7   15.73    0.94
   6   3  -7   14.53    1.16
  -5  -3   7    1.22    0.26
   5  -3  -7    1.36    0.23
   5   3  -7    1.35    0.34
  -5   3   7    1.13    0.25
   5   3  -7    1.97    0.33
  -5   3   7    1.95    0.28
   5   3  -7    1.29    0.27
  -5   3   7    1.02    0.25
  -4  -3   7    9.72    0.76
   4  -3  -7   10.12    0.71
   4   3  -7    9.10    0.78
  -4   3   7   10.21    0.65
  -4   3   7    9.86    0.80
  -4   3   7    9.75    0.80
   4   3  -7   10.80    0.85
   4   3  -7    9.19    0.79
  -3  -3   7   19.66    1.24
   3  -3  -7   17.37    1.16
   3   3  -7   16.61    1.19
   3   3  -7   18.30    1.34
  -3   3   7   18.88    1.31
   3   3  -7   19.08    1.32
  -3   3   7   18.50    1.05
  -3   3   7   18.26    1.33
   2  -3  -7   13.81    0.90
  -2  -3   7   14.05    0.97
  -2   3   7   13.23    0.81
  -2   3   7   13.83    1.03
   2   3  -7   13.92    1.02
  -2   3   7   13.30    1.01
   2   3  -7   11.99    0.92
   1  -3  -7    2.02    0.27
  -1  -3   7    1.93    0.32
  -1   3   7    2.33    0.28
   1   3  -7    2.07    0.36
  -1   3   7    2.25    0.32
   1   3  -7    2.19    0.32
   1   3  -7    2.22    0.37
  -1   3   7    2.46    0.34
   0  -3   7    1.06    0.23
   0  -3  -7    1.37    0.23
   0   3   7    1.16    0.23
   0   3   7    1.45    0.28
   0   3  -7    1.60    0.28
   0   3   7    1.30    0.22
   0   3  -7    1.18    0.27
   0   3  -7    2.39    0.38
  -1  -3  -7   19.19    1.22
   1  -3   7   17.20    1.28
  -1   3  -7   20.29    1.39
  -1   3  -7   20.35    1.24
   1   3   7   20.55    1.38
   1   3   7   17.32    1.36
   1   3   7   20.13    1.13
  -1   3  -7   17.87    1.38
  -2  -3  -7    1.24    0.24
   2  -3   7    2.01    0.37
  -2   3  -7    2.01    0.36
  -2   3  -7    1.21    0.29
   2   3   7    1.11    0.22
   2   3   7    1.64    0.30
   3  -3   7    2.22    0.40
  -3  -3  -7    2.59    0.35
  -3   3  -7    2.07    0.38
   3   3   7    2.88    0.41
   3   3   7    2.11    0.32
   4  -3   7    4.73    0.61
  -4  -3  -7    3.42    0.45
   4   3   7    4.76    0.53
  -4   3  -7    4.14    0.52
  -5  -3  -7    0.04    0.13
   5  -3   7   -0.04    0.13
  -5  -3  -7    0.16    0.15
   5  -3   7   -0.08    0.12
  -5   3  -7    0.01    0.04
   5   3   7    0.13    0.15
  -6  -3  -7    4.62    0.64
   6  -3   7    3.97    0.61
   7  -3   7    2.86    0.54
  -7  -3  -7    1.41    0.41
  -7   3  -7    2.35    0.43
   7   3   7    1.58    0.38
  -8  -3  -7    1.19    0.37
   8   3   7    0.84    0.29
  -8   3  -7    0.59    0.25
  -9  -3  -7    0.47    0.25
   9  -3   7    0.65    0.32
  -9   3  -7   -0.03    0.15
   9   3   7   -0.01    0.23
  10  -3   7    0.58    0.33
 -10  -3  -7    0.80    0.37
 -10   3  -7    0.47    0.28
  10   3   7    0.42    0.33
 -11  -3  -7    0.88    0.37
  11  -3   7    1.57    0.51
  11   3   7    1.30    0.49
 -11   3  -7    0.74    0.30
  14  -4  -7    0.47    0.39
 -14  -4   7    1.40    0.42
 -14   4   7    0.67    0.30
  14   4  -7    0.17    0.38
 -13  -4   7    1.17    0.36
  13  -4  -7    0.59    0.37
 -13   4   7    0.80    0.30
  13   4  -7    0.14    0.35
 -12  -4   7   -0.16    0.20
  12  -4  -7    0.19    0.31
  12   4  -7    0.07    0.26
 -12   4   7    0.04    0.15
  11  -4  -7    0.26    0.26
 -11  -4   7    0.47    0.23
  11   4  -7    1.08    0.43
 -11   4   7    0.67    0.25
 -10  -4   7    0.23    0.19
  10  -4  -7    0.29    0.29
  10   4  -7   -0.03    0.21
 -10   4   7    0.18    0.14
  -9  -4   7    0.22    0.21
   9  -4  -7    0.25    0.24
  -9   4   7    0.41    0.17
   9   4  -7    0.36    0.27
  -8  -4   7    0.79    0.26
   8  -4  -7    0.94    0.32
   8   4  -7    0.66    0.30
  -8   4   7    0.91    0.23
   7   4  -7    3.82    0.61
  -7   4   7    3.79    0.43
  -6  -4   7    0.00    0.04
   6  -4  -7    0.01    0.06
  -6  -4   7    0.02    0.03
  -6   4   7    0.12    0.12
   6   4  -7    0.04    0.19
  -6   4   7    0.13    0.12
   6   4  -7   -0.02    0.11
  -6   4   7   -0.01    0.05
  -5   4   7    2.04    0.35
   5   4  -7    5.08    0.63
   4   4  -7   13.68    1.05
  -4   4   7   13.80    1.05
  -4   4   7   13.77    0.84
   4   4  -7   13.60    1.08
   4   4  -7   13.99    1.01
  -3   4   7   12.51    0.76
   3   4  -7   11.88    0.91
   3   4  -7   13.21    0.96
  -3   4   7   10.63    0.91
   3   4  -7   12.85    0.98
  -3   4   7   12.04    0.95
   2   4  -7    5.08    0.49
  -2   4   7    4.99    0.39
  -2   4   7    4.58    0.48
  -2   4   7    4.53    0.46
   2   4  -7    5.08    0.50
   2   4  -7    5.69    0.63
  -1   4   7    4.13    0.44
  -1   4   7    3.79    0.42
   1   4  -7    5.72    0.52
   1   4  -7    4.62    0.49
  -1   4   7    4.72    0.37
   1   4  -7    4.84    0.47
   0   4   7    6.94    0.48
   0   4  -7    7.04    0.59
   0   4  -7    5.81    0.56
   0   4   7    5.17    0.56
   0   4   7    6.52    0.60
   0   4  -7    8.12    0.66
   1   4   7    3.47    0.42
  -1   4  -7    6.21    0.52
   3   4   7    3.52    0.45
  -3   4  -7    4.06    0.53
  -4  -4  -7    0.74    0.27
   4  -4   7    0.75    0.25
  -4   4  -7    0.60    0.22
   4   4   7    0.38    0.17
   5  -4   7    1.68    0.38
  -5  -4  -7    1.57    0.35
  -5   4  -7    1.44    0.33
   5   4   7    1.07    0.26
  -6  -4  -7    0.81    0.29
   6  -4   7    0.86    0.32
  -6   4  -7    0.32    0.20
   6   4   7    0.57    0.22
  -7  -4  -7    0.28    0.24
   7  -4   7    0.18    0.26
   7   4   7    0.17    0.22
  -7   4  -7    0.33    0.21
   8  -4   7    0.67    0.32
  -8  -4  -7    1.22    0.40
   8   4   7    0.85    0.34
  -8   4  -7    0.89    0.30
  -9  -4  -7    0.61    0.35
   9  -4   7    0.17    0.24
   9   4   7    0.57    0.34
  -9   4  -7    0.36    0.24
 -10  -4  -7    1.10    0.41
  10  -4   7    0.62    0.37
  10   4   7    0.90    0.40
 -10   4  -7    1.14    0.35
  12  -5  -7    1.21    0.50
 -12  -5   7    1.11    0.38
  12   5  -7    1.39    0.50
 -12   5   7    0.95    0.28
  11  -5  -7    0.31    0.36
 -11  -5   7    0.37    0.27
  11   5  -7    0.32    0.29
 -11   5   7    0.41    0.19
  10  -5  -7    0.31    0.31
 -10  -5   7    0.13    0.21
 -10   5   7    0.03    0.14
  10   5  -7    0.08    0.29
  -9  -5   7    0.16    0.21
   9  -5  -7    0.30    0.28
  -9   5   7    0.08    0.13
   9   5  -7   -0.05    0.19
  -8  -5   7    0.25    0.18
   8  -5  -7    0.40    0.32
  -8   5   7    0.22    0.14
   8   5  -7    0.44    0.29
   8   5  -7    0.19    0.18
   7  -5  -7    2.41    0.50
   7   5  -7    3.68    0.53
   7   5  -7    3.33    0.57
  -7   5   7    3.78    0.43
   6   5  -7    0.79    0.33
  -6   5   7    1.80    0.28
  -6   5   7    1.71    0.31
   5   5  -7    1.24    0.29
   5   5  -7    1.34    0.37
  -5   5   7    1.11    0.24
  -5   5   7    2.04    0.28
   4   5  -7    1.49    0.37
  -4   5   7    1.84    0.27
   4   5  -7    1.70    0.30
  -4   5   7    1.11    0.24
  -3   5   7    1.37    0.27
   3   5  -7    0.96    0.32
   3   5  -7    1.34    0.28
  -3   5   7    1.52    0.24
   2   5  -7    3.21    0.51
   2   5  -7    4.72    0.46
  -2   5   7    4.73    0.38
  -2   5   7    4.43    0.46
   1  -5  -7    0.02    0.05
  -1   5   7    0.45    0.13
   1   5  -7    0.15    0.17
   1   5  -7    0.29    0.13
  -1   5   7    0.75    0.17
   0  -5  -7    0.01    0.05
   0  -5   7   -0.02    0.04
   0   5   7    0.10    0.12
   0   5  -7    0.10    0.09
   0   5  -7    0.00    0.04
   0   5   7   -0.01    0.03
   0   5  -7    0.38    0.21
   0   5   7    0.16    0.11
   1   5   7    0.91    0.20
   1   5   7    0.65    0.18
  -1   5  -7    0.91    0.27
  -2  -5  -7   -0.01    0.05
   2  -5   7    0.05    0.05
  -2   5  -7    0.34    0.18
   2   5   7    0.01    0.10
   2   5   7    0.04    0.03
  -2   5  -7   -0.02    0.04
   3  -5   7    1.01    0.26
  -3  -5  -7    0.79    0.27
  -3   5  -7    0.68    0.22
   3   5   7    0.88    0.23
  -4  -5  -7    2.96    0.47
   4  -5   7    4.01    0.55
  -4   5  -7    3.47    0.49
   4   5   7    2.37    0.39
  -5  -5  -7   -0.03    0.17
   5  -5   7   -0.07    0.20
  -5   5  -7    0.33    0.19
   5   5   7    0.22    0.17
   6  -5   7    2.59    0.51
  -6  -5  -7    1.93    0.41
  -6   5  -7    2.06    0.41
   6   5   7    1.55    0.38
  -7  -5  -7    0.58    0.29
  -7   5  -7    0.12    0.19
   7   5   7    0.09    0.19
   8  -5   7    0.90    0.39
  -8  -5  -7    0.58    0.33
   8   5   7    0.53    0.31
  -8   5  -7    0.41    0.22
  10   6  -7    0.07    0.31
 -10   6   7    0.40    0.20
  -9   6   7    0.74    0.24
   9   6  -7    0.69    0.36
  -8   6   7    1.56    0.30
   8   6  -7    1.22    0.32
   8   6  -7    1.57    0.46
   7   6  -7    1.65    0.36
   7   6  -7    1.01    0.38
  -7   6   7    1.08    0.25
   6   6  -7    0.41    0.29
   6   6  -7    0.35    0.21
  -6   6   7    0.54    0.18
  -5   6   7   -0.01    0.04
  -5   6   7   -0.03    0.09
   5   6  -7   -0.03    0.04
   5   6  -7   -0.04    0.25
  -5   6   7    0.09    0.13
   4   6  -7    0.44    0.28
  -4   6   7    0.36    0.15
   4   6  -7    0.30    0.13
  -4   6   7    0.16    0.10
  -3   6   7    0.60    0.17
   3   6  -7    0.78    0.29
   3   6  -7    0.59    0.18
  -3   6   7    0.46    0.16
   2   6  -7    0.86    0.21
  -2   6   7    1.33    0.24
   2   6  -7    0.54    0.24
  -1   6   7    0.33    0.13
   1   6  -7    0.88    0.28
  -1   6   7    0.52    0.16
   1   6  -7    0.47    0.17
   0   6  -7    0.59    0.25
   0   6   7    0.61    0.19
   0   6  -7    0.53    0.18
   0   6   7    0.34    0.14
  -1   6  -7    0.37    0.21
   1   6   7    0.19    0.13
  -1   6  -7    0.03    0.04
   1   6   7    0.22    0.16
   2   6   7    0.55    0.20
  -2   6  -7    0.48    0.23
  -3   6  -7    0.68    0.26
   3   6   7    0.54    0.21
  -4   6  -7    0.57    0.24
   4   6   7    0.32    0.22
  -5   6  -7    0.04    0.19
   5   6   7    0.04    0.19
   6   6   7    0.19    0.23
  -6   6  -7    0.19    0.19
   5   7  -7    0.03    0.19
   5   7  -7   -0.18    0.27
  -5   7   7    0.00    0.11
  -5   7   7    0.11    0.16
   5   7  -7    0.01    0.05
  -5   7   7   -0.09    0.05
  -4   7   7    0.02    0.10
  -4   7   7   -0.01    0.04
   4   7  -7   -0.01    0.05
  -3   7   7    1.07    0.23
   2   7  -7    0.06    0.05
  -2   7   7    0.55    0.16
  -1   7   7    0.21    0.12
   1   7  -7    0.11    0.05
  -1   7   7    0.01    0.04
   0   7   7    0.28    0.13
   0   7  -7    0.23    0.25
  -1   7  -7    0.38    0.26
  16   0  -8    0.45    0.44
 -16   0   8   -0.02    0.31
 -15   0   8    0.50    0.30
  15   0  -8    0.75    0.43
  14   0  -8    0.72    0.38
 -14   0   8    0.95    0.38
  13   0  -8    0.04    0.30
 -13   0   8   -0.01    0.06
  13   0  -8    0.04    0.11
 -13   0   8    0.00    0.19
  -8   0   8    1.14    0.27
   8   0  -8    1.07    0.34
   7   0  -8    0.19    0.16
   7   0  -8   -0.03    0.06
  -7   0   8    0.25    0.14
   6   0  -8    9.46    0.72
  -6   0   8    9.54    0.82
   6   0  -8    8.02    0.77
  -6   0   8    7.52    0.65
  -6   0   8    9.07    0.72
   5   0  -8   39.79    2.56
   5   0  -8   45.72    2.58
  -5   0   8   46.44    2.70
  -5   0   8   39.06    2.43
   5   0  -8   45.88    2.69
  -5   0   8   42.61    2.56
  -4   0   8    4.55    0.57
   4   0  -8    3.93    0.46
  -4   0   8    3.53    0.36
   4   0  -8    3.87    0.57
  -4   0   8    3.28    0.43
   4   0  -8    3.67    0.50
   3   0  -8   22.60    1.49
  -3   0   8   19.04    1.30
  -3   0   8   22.65    1.49
   3   0  -8   22.37    1.40
  -3   0   8   22.98    1.41
   3   0  -8   20.72    1.43
   2   0  -8    4.76    0.60
   2   0  -8    5.23    0.47
   2   0  -8    3.90    0.51
  -2   0   8    5.29    0.44
  -2   0   8    5.77    0.49
  -2   0   8    3.33    0.47
   1   0  -8    4.84    0.46
   1   0  -8    5.28    0.51
   1   0  -8    4.84    0.52
  -1   0   8    4.39    0.45
  -1   0   8    5.51    0.56
  -1   0   8    4.52    0.42
   0   0   8   47.44    2.81
   0   0   8   47.28    2.59
   0   0  -8   43.87    2.75
   0   0  -8   44.43    2.66
   0   0  -8   46.73    2.71
   0   0   8   45.09    2.71
  -1   0  -8    0.28    0.14
   1   0   8    0.20    0.15
  -1   0  -8    0.25    0.14
   1   0   8    0.36    0.13
   1   0   8    0.28    0.17
  -1   0  -8    0.09    0.12
  -2   0  -8    0.09    0.11
   2   0   8    0.02    0.03
   2   0   8    0.33    0.18
   2   0   8    0.13    0.12
  -2   0  -8    0.12    0.13
  -2   0  -8    0.00    0.03
  -5   0  -8    4.76    0.66
   5   0   8    3.95    0.58
   6   0   8    1.54    0.39
  -6   0  -8    1.27    0.36
  -7   0  -8    7.43    0.91
   7   0   8    5.81    0.83
  -8   0  -8    6.30    0.80
   9   0   8   -0.12    0.17
  -9   0  -8    0.06    0.22
  10   0   8    0.35    0.33
 -10   0  -8   -0.06    0.26
  11   0   8   -0.02    0.29
 -11   0  -8    0.25    0.32
  16  -1  -8    0.35    0.41
 -16  -1   8    0.13    0.33
 -16   1   8    0.45    0.30
  16   1  -8    0.69    0.56
  16   1  -8   -0.12    0.41
 -15  -1   8    0.16    0.30
  15  -1  -8    0.30    0.38
 -15   1   8    0.06    0.21
 -15   1   8    0.46    0.32
  15   1  -8    0.08    0.41
  15   1  -8    0.48    0.43
  14  -1  -8    0.36    0.32
 -14  -1   8   -0.16    0.23
  14   1  -8    0.14    0.36
 -14   1   8    0.33    0.28
  14   1  -8    0.27    0.33
 -14   1   8    0.51    0.26
  13  -1  -8    0.18    0.33
 -13  -1   8    0.04    0.24
  13   1  -8   -0.07    0.11
 -13   1   8    0.00    0.05
 -13   1   8    0.50    0.29
  13   1  -8   -0.15    0.22
 -12  -1   8    1.94    0.41
  12  -1  -8    1.45    0.45
 -12   1   8    2.49    0.44
  12   1  -8    1.62    0.52
 -11  -1   8    5.80    0.69
  11  -1  -8    5.24    0.86
  11   1  -8    5.13    0.82
 -11   1   8    5.77    0.69
 -10  -1   8    0.74    0.25
  10  -1  -8    0.74    0.31
 -10   1   8    1.59    0.33
  10   1  -8    0.97    0.34
   9  -1  -8    5.23    0.81
  -9  -1   8    6.78    0.65
   9   1  -8    8.63    0.82
  -9   1   8    8.22    0.66
  -8  -1   8    0.36    0.17
   8  -1  -8    0.32    0.22
   8  -1  -8   -0.10    0.08
   8   1  -8   -0.01    0.07
  -8   1   8    0.28    0.14
   8   1  -8    0.31    0.22
   7  -1  -8    5.18    0.51
  -7  -1   8    4.90    0.49
  -7  -1   8    5.96    0.70
   7  -1  -8    4.11    0.66
   7   1  -8    5.76    0.75
  -7   1   8    4.89    0.47
  -6  -1   8    0.92    0.28
   6  -1  -8    0.63    0.27
   6  -1  -8    0.99    0.24
  -6  -1   8    0.66    0.20
  -6   1   8    0.59    0.20
  -6   1   8    1.30    0.25
   6   1  -8    1.15    0.30
   6   1  -8    1.02    0.29
  -5  -1   8   19.02    1.29
  -5  -1   8   19.08    1.15
   5  -1  -8   15.65    1.23
   5  -1  -8   16.10    1.16
  -5  -1   8   15.16    1.16
   5  -1  -8   19.88    1.31
  -5   1   8   20.02    1.22
  -5   1   8   15.73    1.09
   5   1  -8   19.94    1.31
   5   1  -8   14.72    1.19
  -5   1   8   18.23    1.36
   4  -1  -8    3.90    0.54
   4  -1  -8    2.87    0.39
  -4  -1   8    3.41    0.48
  -4  -1   8    4.00    0.47
   4  -1  -8    3.58    0.49
  -4  -1   8    2.95    0.39
   4   1  -8    3.58    0.44
  -4   1   8    3.27    0.34
  -4   1   8    3.83    0.45
   4   1  -8    4.35    0.55
   4   1  -8    3.23    0.48
   4   1  -8    4.77    0.60
  -4   1   8    3.32    0.40
  -4   1   8    4.18    0.54
   3  -1  -8    5.13    0.58
  -3  -1   8    5.91    0.53
  -3  -1   8    6.95    0.58
   3  -1  -8    7.23    0.58
  -3  -1   8    7.00    0.65
   3  -1  -8    5.69    0.60
  -3   1   8    6.73    0.58
  -3   1   8    6.57    0.63
  -3   1   8    6.96    0.53
   3   1  -8    6.27    0.63
   3   1  -8    6.96    0.58
   3   1  -8    7.16    0.64
  -3   1   8    7.48    0.62
   3   1  -8    6.45    0.60
   2  -1  -8   18.47    1.30
  -2  -1   8   19.23    1.20
  -2  -1   8   20.20    1.25
   2  -1  -8   16.53    1.21
   2  -1  -8   19.66    1.31
  -2  -1   8   17.16    1.30
   2   1  -8   19.42    1.39
  -2   1   8   18.16    1.24
  -2   1   8   18.15    1.33
  -2   1   8   21.48    1.37
  -2   1   8   17.12    1.16
   2   1  -8   20.31    1.26
   2   1  -8   19.33    1.33
   2   1  -8   19.38    1.28
  -1  -1   8   27.87    1.61
  -1  -1   8   26.18    1.76
   1  -1  -8   29.05    1.75
   1  -1  -8   26.89    1.71
  -1  -1   8   26.17    1.67
   1  -1  -8   27.21    1.67
  -1   1   8   28.23    1.80
  -1   1   8   24.91    1.58
   1   1  -8   25.94    1.75
   1   1  -8   28.81    1.69
  -1   1   8   26.65    1.68
  -1   1   8   25.08    1.82
   1   1  -8   27.85    1.70
   0  -1  -8    6.51    0.57
   0  -1   8    6.09    0.57
   0  -1   8    6.97    0.57
   0  -1  -8    6.52    0.61
   0  -1  -8    7.72    0.65
   0  -1   8    7.03    0.65
   0   1  -8    6.74    0.64
   0   1  -8    6.36    0.58
   0   1   8    6.94    0.59
   0   1   8    7.84    0.69
   0   1   8    6.64    0.54
   0   1  -8    6.54    0.60
   1  -1   8    4.17    0.42
  -1  -1  -8    4.60    0.57
   1  -1   8    4.33    0.56
  -1  -1  -8    4.32    0.43
   1   1   8    4.25    0.50
   1   1   8    4.57    0.48
  -1   1  -8    4.21    0.53
  -1   1  -8    4.12    0.56
   2  -1   8   13.06    0.91
   2  -1   8   12.57    1.00
  -2  -1  -8   11.03    0.93
  -2  -1  -8   13.14    0.93
   2   1   8   13.18    0.90
  -2   1  -8   11.31    0.91
  -3  -1  -8    3.71    0.46
  -3  -1  -8    2.73    0.44
   3  -1   8    2.45    0.44
   3  -1   8    3.18    0.48
  -3   1  -8    3.21    0.47
   3   1   8    3.37    0.46
  -5  -1  -8   16.11    1.19
   5  -1   8   16.40    1.16
  -5   1  -8   15.14    1.14
   5   1   8   14.81    1.12
   6  -1   8    5.62    0.74
  -6  -1  -8    6.35    0.79
   6   1   8    5.98    0.75
  -6   1  -8    6.98    0.83
   7  -1   8    1.85    0.47
  -7  -1  -8    1.67    0.45
  -7   1  -8    1.12    0.33
   7   1   8    1.29    0.36
   8  -1   8    1.71    0.46
  -8  -1  -8    1.67    0.42
   8   1   8    2.03    0.48
  -8   1  -8    2.10    0.48
  -9  -1  -8    0.63    0.31
   9  -1   8    0.77    0.33
  -9   1  -8    0.47    0.32
   9   1   8    0.93    0.38
  -9   1  -8    0.53    0.21
   9   1   8    0.50    0.30
  10  -1   8   -0.03    0.27
 -10  -1  -8    0.13    0.27
  10   1   8    0.05    0.32
 -10   1  -8    0.06    0.28
 -10   1  -8    0.42    0.24
  10   1   8    0.14    0.28
 -11  -1  -8    0.75    0.39
  11  -1   8    0.95    0.40
  11   1   8    0.47    0.40
 -11   1  -8    0.35    0.31
  11   1   8    1.11    0.46
 -11   1  -8    0.87    0.44
  16   2  -8    0.11    0.43
 -16   2   8    0.77    0.33
 -15  -2   8   -0.19    0.25
  15  -2  -8   -0.12    0.31
 -15   2   8   -0.14    0.19
  15   2  -8   -0.05    0.36
  14  -2  -8    0.44    0.36
 -14  -2   8    0.29    0.26
 -14   2   8    0.44    0.25
  14   2  -8    0.17    0.36
 -13  -2   8    1.85    0.46
  13  -2  -8    1.58    0.49
 -13   2   8    1.17    0.33
  13   2  -8    1.56    0.49
 -12  -2   8    0.31    0.24
  12  -2  -8    0.34    0.30
  12   2  -8   -0.05    0.11
  11  -2  -8    2.38    0.55
 -11  -2   8    1.91    0.41
  11   2  -8    0.64    0.34
  10  -2  -8    3.14    0.63
 -10  -2   8    4.44    0.59
  10   2  -8    3.15    0.63
  -9  -2   8    0.33    0.21
   9  -2  -8    1.14    0.27
   9   2  -8    0.04    0.07
  -9   2   8    0.99    0.26
   9   2  -8    0.65    0.26
   8  -2  -8    5.59    0.52
  -8  -2   8    5.42    0.66
  -8   2   8    3.95    0.52
   8   2  -8    5.60    0.74
  -7  -2   8    0.25    0.17
   7  -2  -8    0.66    0.20
   7  -2  -8    0.00    0.06
  -7   2   8    0.88    0.23
   7   2  -8    0.00    0.06
   7   2  -8    0.92    0.30
   6   2  -8    6.43    0.76
  -2  -2   8    4.03    0.52
   2  -2  -8    3.42    0.42
   2   2  -8    4.74    0.56
  -1  -2   8    1.03    0.26
   1  -2  -8    1.07    0.22
  -1   2   8    1.10    0.25
   1   2  -8    1.06    0.25
  -1   2   8    1.28    0.24
   1   2  -8    1.00    0.24
  -1   2   8    1.19    0.27
   0  -2   8    3.91    0.53
   0  -2  -8    3.42    0.42
   0   2  -8    4.33    0.48
   0   2   8    3.93    0.38
   0   2  -8    4.68    0.56
   0   2   8    3.92    0.43
   3  -2   8    3.41    0.54
  -3  -2  -8    3.60    0.46
   3   2   8    3.22    0.49
  -3   2  -8    4.34    0.57
   5  -2   8    5.77    0.73
  -5  -2  -8    5.75    0.75
   5   2   8    5.28    0.66
  -5   2  -8    5.64    0.70
  -6  -2  -8    2.69    0.51
   6  -2   8    3.98    0.61
  -6   2  -8    2.35    0.46
   7  -2   8    0.07    0.20
  -7  -2  -8    0.26    0.22
   7   2   8   -0.02    0.06
  -7   2  -8    0.01    0.05
  -8  -2  -8    1.10    0.35
   8  -2   8    0.72    0.39
   8   2   8    1.23    0.37
  -8   2  -8    0.61    0.26
  -9  -2  -8    0.14    0.26
   9   2   8    0.56    0.29
  -9   2  -8    0.49    0.23
  10  -2   8    0.43    0.27
 -10  -2  -8    0.25    0.25
  10   2   8   -0.01    0.30
 -10   2  -8    0.20    0.24
  11  -2   8    1.15    0.44
 -11  -2  -8    1.07    0.42
 -11   2  -8    0.96    0.36
  11   2   8    0.92    0.46
 -15  -3   8    0.26    0.31
  15  -3  -8    0.36    0.42
  15   3  -8    1.12    0.57
 -15   3   8    0.90    0.34
  14  -3  -8    1.19    0.53
 -14  -3   8    0.20    0.29
  14   3  -8    1.03    0.51
 -14   3   8    1.30    0.36
 -13  -3   8    0.40    0.24
  13  -3  -8    0.51    0.33
  13   3  -8    0.92    0.43
 -13   3   8    0.38    0.23
 -12  -3   8    0.66    0.25
  12  -3  -8    0.23    0.31
  12   3  -8    0.71    0.39
 -12   3   8    0.77    0.25
 -11  -3   8    0.43    0.24
  11  -3  -8    1.36    0.47
  11   3  -8    1.51    0.52
 -11   3   8    1.47    0.32
  10  -3  -8    1.21    0.43
 -10  -3   8    1.02    0.32
  -9  -3   8    3.87    0.56
  -9  -3   8    4.05    0.60
   9  -3  -8    2.45    0.54
   9  -3  -8    4.25    0.54
  -8  -3   8    0.00    0.04
   8  -3  -8    1.21    0.28
   8  -3  -8    0.03    0.06
  -8  -3   8    1.16    0.33
   8   3  -8    0.25    0.23
  -8   3   8    1.03    0.25
   7  -3  -8    2.21    0.34
  -7  -3   8    1.73    0.37
  -7   3   8    2.29    0.34
   7   3  -8    1.81    0.44
   6  -3  -8   10.04    0.75
  -6  -3   8   10.05    0.83
  -6   3   8    9.34    0.68
  -6   3   8   10.73    0.87
   6   3  -8    9.32    0.85
   5  -3  -8    7.10    0.59
  -5  -3   8    6.83    0.64
  -5   3   8    7.48    0.67
   5   3  -8    6.61    0.66
  -5   3   8    6.45    0.51
   5   3  -8    7.51    0.84
   4  -3  -8   15.49    1.00
  -4  -3   8   14.86    1.07
  -4   3   8   13.59    1.11
  -4   3   8   14.76    0.89
   4   3  -8   13.95    1.06
   4   3  -8   13.45    1.12
  -4   3   8   14.34    1.10
   3  -3  -8    5.42    0.48
  -3  -3   8    5.38    0.54
   3   3  -8    5.65    0.56
  -3   3   8    5.42    0.54
  -3   3   8    5.14    0.52
   3   3  -8    5.47    0.67
  -3   3   8    4.38    0.41
  -2  -3   8    7.69    0.67
   2  -3  -8    7.41    0.59
  -2   3   8    7.87    0.71
  -2   3   8    6.83    0.53
   2   3  -8    6.81    0.77
  -2   3   8    7.82    0.67
  -1  -3   8   15.69    1.09
   1  -3  -8   14.70    0.99
  -1   3   8   13.50    1.07
  -1   3   8   14.47    0.89
  -1   3   8   14.48    1.11
   1   3  -8   15.05    1.14
   1   3  -8   14.23    1.03
   0  -3  -8    5.94    0.53
   0  -3   8    6.52    0.62
   0   3  -8    5.99    0.63
   0   3   8    6.92    0.61
   0   3   8    6.24    0.49
   0   3  -8    6.57    0.60
  -1  -3  -8    3.14    0.40
   1  -3   8    2.48    0.43
  -1   3  -8    4.10    0.54
  -1   3  -8    3.82    0.51
   1   3   8    3.34    0.47
   1   3   8    2.92    0.37
  -2  -3  -8    4.80    0.47
   2  -3   8    5.78    0.66
  -2   3  -8    5.72    0.64
   2   3   8    4.16    0.42
  -3  -3  -8    1.05    0.25
   3  -3   8    1.19    0.32
   3   3   8    1.01    0.24
  -3   3  -8    1.25    0.32
   4  -3   8   14.23    1.04
   4  -3   8   13.23    1.10
  -4  -3  -8   13.43    1.02
  -5  -3  -8    2.27    0.44
   5  -3   8    2.56    0.47
  -6  -3  -8    1.62    0.40
   6  -3   8    1.48    0.40
   6   3   8    1.48    0.36
  -6   3  -8    2.40    0.44
  -7  -3  -8    3.32    0.60
   7  -3   8    3.39    0.62
   7   3   8    3.92    0.59
  -7   3  -8    3.86    0.59
   8  -3   8    1.81    0.49
  -8  -3  -8    2.84    0.58
   8   3   8    1.68    0.43
  -8   3  -8    2.01    0.43
  -9  -3  -8    2.80    0.58
   9  -3   8    2.14    0.51
   9   3   8    1.09    0.36
  -9   3  -8    1.56    0.40
  10  -3   8    0.98    0.43
 -10  -3  -8    0.31    0.30
  10   3   8    0.52    0.38
 -10   3  -8    0.50    0.30
  14  -4  -8   -0.11    0.34
 -14   4   8    0.33    0.22
  14   4  -8    0.19    0.34
  13  -4  -8    0.39    0.41
 -13  -4   8    0.14    0.24
  13   4  -8    0.29    0.36
 -13   4   8    0.17    0.21
  12  -4  -8    0.00    0.24
 -12  -4   8    0.11    0.24
  12   4  -8    0.10    0.26
 -12   4   8    0.15    0.17
 -11  -4   8    0.42    0.24
  11  -4  -8    1.46    0.48
 -11   4   8    0.82    0.23
  11   4  -8    0.45    0.30
 -10  -4   8    0.10    0.20
  10  -4  -8    0.17    0.27
  10   4  -8    0.02    0.25
 -10   4   8    0.33    0.18
  -9  -4   8    0.06    0.17
   9  -4  -8   -0.01    0.23
   9   4  -8    0.06    0.25
  -9   4   8   -0.05    0.12
   8  -4  -8    2.29    0.53
  -8  -4   8    1.63    0.35
  -8   4   8    1.81    0.33
   8   4  -8    2.55    0.51
  -7  -4   8    2.00    0.39
   7   4  -8    3.58    0.59
  -7   4   8    4.23    0.47
   7   4  -8    4.44    0.61
  -6   4   8    2.50    0.35
   6   4  -8    2.41    0.48
  -5   4   8    1.99    0.31
   5   4  -8    1.99    0.38
   5   4  -8    1.60    0.41
   4   4  -8    2.42    0.49
   4   4  -8    3.38    0.50
  -4   4   8    2.80    0.44
  -4   4   8    3.02    0.37
   1  -4  -8    0.02    0.03
  -1  -4   8   -0.01    0.03
  -1  -4   8   -0.01    0.04
   1  -4  -8    0.02    0.05
  -1   4   8    0.06    0.12
  -1   4   8    0.12    0.11
  -1   4   8   -0.02    0.03
   1   4  -8    0.09    0.14
   1   4  -8   -0.06    0.14
   0   4   8    1.36    0.25
   0   4  -8    2.43    0.40
   0   4  -8    1.44    0.36
  -2   4  -8    5.00    0.63
   3  -4   8    5.65    0.65
  -3  -4  -8    5.76    0.69
   3   4   8    5.30    0.50
  -3   4  -8    4.63    0.63
  -4  -4  -8    0.31    0.22
   4  -4   8    0.20    0.19
  -4   4  -8    0.11    0.16
   4   4   8   -0.02    0.14
   5  -4   8    2.55    0.47
  -5  -4  -8    2.08    0.42
  -5   4  -8    1.74    0.39
   5   4   8    0.88    0.26
  -6  -4  -8    0.17    0.19
   6  -4   8    0.19    0.24
   6   4   8   -0.06    0.16
  -6   4  -8    0.11    0.19
   7  -4   8    0.03    0.23
  -7  -4  -8   -0.04    0.19
   7   4   8   -0.05    0.16
  -7   4  -8    0.21    0.20
  -8  -4  -8   -0.05    0.21
   8   4   8   -0.13    0.20
  -8   4  -8    0.25    0.23
   9  -4   8   -0.16    0.22
  -9  -4  -8    0.30    0.30
  -9   4  -8    0.19    0.20
   9   4   8    0.50    0.30
 -12  -5   8    0.42    0.31
  12  -5  -8   -0.03    0.29
 -12   5   8    0.10    0.15
  12   5  -8    0.01    0.26
 -11  -5   8    0.61    0.30
  11  -5  -8    0.81    0.42
  11   5  -8   -0.02    0.35
 -11   5   8    0.93    0.27
  10  -5  -8    0.08    0.28
 -10  -5   8    0.11    0.22
 -10   5   8    0.32    0.18
  10   5  -8    0.07    0.31
  -9  -5   8    0.56    0.28
   9  -5  -8    0.45    0.33
   9   5  -8    1.06    0.43
  -9   5   8    0.82    0.23
  -8  -5   8    0.72    0.28
   8  -5  -8    1.88    0.49
   8   5  -8    1.59    0.45
  -8   5   8    1.85    0.32
  -7  -5   8    1.18    0.29
   7  -5  -8    1.34    0.42
  -7   5   8    1.34    0.28
   7   5  -8    1.43    0.37
   7   5  -8    1.16    0.36
   6  -5  -8    3.28    0.59
  -6   5   8    3.19    0.39
   6   5  -8    1.53    0.44
  -5  -5   8    0.37    0.20
   5  -5  -8    0.03    0.07
  -5   5   8   -0.02    0.03
   5   5  -8    0.01    0.04
  -5   5   8    0.04    0.12
   5   5  -8    0.23    0.24
   4  -5  -8    0.02    0.07
  -4  -5   8   -0.02    0.05
   4   5  -8   -0.05    0.04
   4   5  -8    0.19    0.22
  -4   5   8   -0.01    0.04
  -4   5   8    0.10    0.11
  -4   5   8    0.12    0.12
  -3  -5   8    0.01    0.04
   3  -5  -8   -0.02    0.06
  -3   5   8    0.26    0.14
   3   5  -8    0.11    0.19
  -3   5   8    0.16    0.12
   3   5  -8    0.02    0.04
  -2  -5   8    0.00    0.05
   2  -5  -8   -0.03    0.06
   2   5  -8    0.01    0.04
  -2   5   8    0.44    0.16
   2   5  -8    0.50    0.23
   1  -5  -8    0.03    0.06
  -1   5   8    0.27    0.14
  -1   5   8    0.29    0.13
   1   5  -8    0.20    0.19
   0  -5   8    0.38    0.13
   0   5   8    1.16    0.24
   0   5  -8    1.10    0.31
   1  -5   8    1.16    0.29
  -1  -5  -8    1.74    0.37
   1   5   8    1.50    0.27
  -1   5  -8    1.04    0.28
  -2  -5  -8    0.75    0.27
   2  -5   8    1.51    0.33
   2   5   8    0.68    0.21
  -2   5  -8    1.16    0.30
  -3  -5  -8    1.37    0.33
   3  -5   8    1.16    0.31
  -3   5  -8    1.12    0.29
   3   5   8    0.56    0.22
   4  -5   8    0.96    0.32
  -4  -5  -8    0.86    0.32
   4   5   8    0.69    0.23
  -4   5  -8    1.29    0.33
   5  -5   8    0.69    0.29
  -5  -5  -8    0.73    0.28
   5   5   8    0.06    0.18
  -5   5  -8    0.62    0.25
  -6  -5  -8    0.06    0.21
   6  -5   8    0.41    0.30
  -6   5  -8    0.62    0.27
   6   5   8    0.16    0.20
  -7  -5  -8    0.28    0.26
   7   5   8    0.38    0.26
  -7   5  -8    0.34    0.23
   9   6  -8    0.16    0.27
  -9   6   8    0.10    0.15
   8   6  -8    0.20    0.27
  -8   6   8    0.13    0.15
   7   6  -8    0.12    0.29
   7   6  -8    0.48    0.28
  -7   6   8    0.24    0.17
   6   6  -8    0.30    0.30
  -6   6   8    0.84    0.22
  -5   6   8    0.03    0.14
   5   6  -8    0.22    0.27
   5   6  -8   -0.02    0.05
  -5   6   8   -0.01    0.04
   4   6  -8   -0.03    0.05
   4   6  -8   -0.09    0.21
  -4   6   8    0.09    0.14
  -4   6   8   -0.01    0.04
   3   6  -8    1.76    0.43
  -3   6   8    2.17    0.33
  -2   6   8    1.71    0.28
   2   6  -8    1.11    0.33
   1   6  -8    0.61    0.29
  -1   6   8    0.65    0.19
   0   6  -8    0.04    0.05
   0   6   8    0.01    0.04
   0   6  -8   -0.08    0.17
   0   6   8   -0.04    0.13
  -1   6  -8    0.25    0.21
  -1   6  -8    0.04    0.06
   1   6   8    0.00    0.04
   1   6   8    0.06    0.15
   2   6   8    0.12    0.17
  -2   6  -8    0.02    0.17
   2   6   8   -0.04    0.05
  -3   6  -8    0.21    0.21
   3   6   8    0.24    0.19
   4   6   8    0.41    0.23
  -4   6  -8    0.48    0.24
   5   6   8   -0.05    0.19
  -5   6  -8    0.64    0.25
  -3   7   8    0.01    0.05
  -3   7   8    0.12    0.16
  -2   7   8    0.00    0.05
  -2   7   8   -0.01    0.16
   2   7  -8    0.01    0.21
 -16   0   9    0.18    0.28
  16   0  -9    0.55    0.49
 -15   0   9    0.70    0.37
  15   0  -9    0.02    0.34
 -14   0   9    0.17    0.25
  14   0  -9   -0.05    0.29
  13   0  -9    0.44    0.36
 -13   0   9    0.07    0.23
  12   0  -9   -0.02    0.11
 -12   0   9    0.01    0.05
 -12   0   9    0.33    0.22
  12   0  -9    0.24    0.27
  11   0  -9    0.68    0.36
 -11   0   9    0.56    0.27
 -10   0   9    0.53    0.24
  10   0  -9    0.52    0.29
   9   0  -9    1.66    0.49
  -9   0   9    1.06    0.29
   8   0  -9    7.12    0.92
   7   0  -9    0.41    0.24
  -7   0   9    0.64    0.23
   6   0  -9    1.88    0.42
  -6   0   9    0.77    0.23
  -5   0   9    9.25    0.89
   5   0  -9    8.60    0.79
  -5   0   9    9.41    0.71
   5   0  -9    9.76    0.85
  -4   0   9   32.17    2.20
   4   0  -9   34.14    2.10
  -4   0   9   34.98    2.02
   4   0  -9   35.35    2.16
  -3   0   9    2.10    0.34
  -3   0   9    1.84    0.38
   3   0  -9    2.81    0.40
   3   0  -9    2.70    0.46
  -3   0   9    3.00    0.41
  -2   0   9   11.53    0.80
  -2   0   9   12.06    0.95
   2   0  -9   10.96    0.83
   2   0  -9   10.12    0.87
  -2   0   9   10.05    0.83
   1   0  -9    1.91    0.33
  -1   0   9    2.20    0.35
  -1   0   9    1.57    0.35
   1   0  -9    1.80    0.37
  -1   0  -9    0.06    0.11
   1   0   9   -0.01    0.03
   1   0   9    0.24    0.14
  -1   0  -9    0.01    0.04
  -3   0  -9    0.14    0.18
   3   0   9    0.41    0.18
  -3   0  -9    0.00    0.04
   3   0   9   -0.01    0.04
  -4   0  -9    0.06    0.15
  -4   0  -9    0.00    0.05
   4   0   9    0.00    0.04
   4   0   9    0.10    0.15
   6   0   9    0.79    0.34
  -6   0  -9    0.96    0.36
   7   0   9    0.60    0.31
  -7   0  -9   -0.03    0.05
   7   0   9   -0.04    0.07
  -7   0  -9    0.15    0.26
   8   0   9    1.09    0.41
  -8   0  -9    0.94    0.35
   9   0   9    0.17    0.29
  -9   0  -9    0.49    0.31
  10   0   9    3.00    0.67
 -10   0  -9    3.60    0.73
 -11   0  -9    1.68    0.55
  11   0   9    2.27    0.62
  16  -1  -9   -0.05    0.33
 -16  -1   9    0.26    0.30
  16   1  -9    0.35    0.50
  15  -1  -9   -0.04    0.33
 -15  -1   9    0.35    0.28
 -15   1   9   -0.06    0.20
  15   1  -9    0.58    0.46
 -15   1   9    0.05    0.28
  15   1  -9   -0.12    0.41
 -14  -1   9    0.40    0.30
  14  -1  -9    2.87    0.70
 -14   1   9    1.61    0.39
  14   1  -9    0.47    0.41
  14   1  -9    1.75    0.59
 -14   1   9    1.93    0.46
 -13  -1   9    2.07    0.46
  13  -1  -9    1.99    0.60
  13   1  -9    1.19    0.52
 -13   1   9    2.44    0.49
 -12  -1   9    1.70    0.41
  12  -1  -9    1.03    0.44
 -12   1   9    1.31    0.36
  12   1  -9    1.94    0.57
  11  -1  -9    3.43    0.69
 -11  -1   9    3.68    0.56
 -11   1   9    3.13    0.49
  11   1  -9    3.06    0.63
 -10  -1   9    9.61    0.85
  10  -1  -9   10.23    1.03
  10   1  -9   10.43    1.00
 -10   1   9    9.39    0.81
  -9  -1   9    4.05    0.57
   9  -1  -9    2.24    0.55
   9   1  -9    4.53    0.70
  -9   1   9    4.13    0.54
  -8  -1   9    1.58    0.34
   8  -1  -9    1.95    0.49
   8   1  -9    1.73    0.44
  -8   1   9    1.82    0.34
   7  -1  -9    6.12    0.81
   7   1  -9    5.56    0.74
  -7   1   9    4.46    0.46
  -6  -1   9    9.63    0.87
   6  -1  -9   10.84    0.91
   6  -1  -9    9.43    0.77
  -6  -1   9    9.87    0.76
  -6   1   9    8.60    0.71
   6   1  -9    9.24    0.83
  -5  -1   9    6.41    0.55
   5  -1  -9    5.93    0.55
  -5  -1   9    5.95    0.71
   5  -1  -9    5.59    0.75
   5   1  -9    5.43    0.73
  -5   1   9    5.53    0.51
   4  -1  -9    7.23    0.74
  -4  -1   9    7.30    0.74
  -4  -1   9    9.28    0.69
   4  -1  -9    9.71    0.71
   4   1  -9   10.25    0.84
  -4   1   9    8.40    0.64
  -4   1   9    7.76    0.69
   4   1  -9    6.23    0.68
  -2  -1   9   14.46    1.10
   2  -1  -9   16.01    1.03
   2  -1  -9   14.20    1.08
  -2  -1   9   15.64    0.99
  -2   1   9   12.33    0.93
   2   1  -9   14.37    1.10
   2   1  -9   12.21    1.01
  -2   1   9   14.61    1.03
  -1  -1   9    0.00    0.12
  -1  -1   9    0.13    0.13
   1  -1  -9    0.14    0.11
   1  -1  -9    0.06    0.12
  -1  -1   9    0.03    0.03
   1  -1  -9    0.00    0.05
  -1   1   9    0.10    0.12
  -1   1   9   -0.04    0.07
  -1   1   9    0.02    0.03
   1   1  -9    0.08    0.14
   1   1  -9   -0.01    0.05
   1   1  -9    0.26    0.14
   0  -1   9    1.67    0.37
   0  -1  -9    2.28    0.42
   0  -1  -9    2.28    0.37
   0  -1   9    2.29    0.36
   0   1  -9    2.01    0.38
   0   1   9    2.11    0.34
   1  -1   9   29.73    2.00
  -1  -1  -9   31.58    1.91
   1  -1   9   30.63    1.83
  -1  -1  -9   33.09    1.94
  -1   1  -9   29.09    1.88
   1   1   9   26.96    1.79
  -2  -1  -9    4.71    0.64
   2  -1   9    3.97    0.52
  -2   1  -9    5.15    0.65
   4  -1   9   35.23    2.24
  -4  -1  -9   38.58    2.33
   4   1   9   36.30    2.24
  -4   1  -9   37.85    2.30
  -5  -1  -9    0.82    0.30
   5  -1   9    1.24    0.36
  -5   1  -9    1.28    0.34
   5   1   9    1.93    0.41
   6  -1   9    0.93    0.35
  -6  -1  -9    2.55    0.53
   6   1   9    1.65    0.39
  -6   1  -9    1.86    0.43
   7  -1   9    0.26    0.28
  -7  -1  -9    0.83    0.35
   7   1   9    0.80    0.36
   7   1   9    0.04    0.06
  -7   1  -9    0.10    0.21
  -7   1  -9    0.00    0.05
  -8  -1  -9   -0.05    0.16
   8  -1   9   -0.01    0.20
  -8   1  -9    0.21    0.27
  -8   1  -9    0.01    0.06
   8   1   9    0.02    0.10
  -9  -1  -9    0.29    0.27
   9   1   9    0.10    0.27
  -9   1  -9   -0.01    0.18
  -9   1  -9    0.48    0.32
   9   1   9   -0.15    0.25
 -10  -1  -9    0.79    0.43
  10  -1   9    0.25    0.33
  10   1   9    0.38    0.36
 -10   1  -9    0.49    0.42
 -10   1  -9    0.47    0.29
  10   1   9    1.05    0.44
  15  -2  -9    0.62    0.40
 -15  -2   9    0.48    0.32
  15   2  -9    0.41    0.46
 -15   2   9    1.49    0.40
 -14  -2   9   -0.06    0.21
  14  -2  -9    0.22    0.37
 -14   2   9    0.47    0.24
  14   2  -9    0.27    0.33
  13  -2  -9    0.14    0.28
 -13  -2   9    0.30    0.26
  13   2  -9    0.54    0.41
 -13   2   9    0.10    0.19
 -12  -2   9   -0.03    0.20
  12  -2  -9   -0.10    0.21
  12   2  -9   -0.14    0.30
 -12   2   9   -0.15    0.13
  11  -2  -9    2.78    0.64
 -11  -2   9    2.63    0.51
  10  -2  -9    1.25    0.41
 -10  -2   9    1.44    0.37
  10   2  -9    1.25    0.39
  -9  -2   9    2.27    0.43
   9  -2  -9    2.95    0.59
   9   2  -9    4.80    0.71
  -8  -2   9    0.05    0.04
  -8  -2   9    0.18    0.19
   8  -2  -9   -0.01    0.06
   8  -2  -9    0.27    0.16
  -8   2   9    0.35    0.17
   8   2  -9    0.46    0.24
   8   2  -9    0.01    0.07
  -7  -2   9    3.39    0.53
   7  -2  -9    4.41    0.53
   7   2  -9    4.01    0.62
  -7   2   9    4.43    0.52
   6  -2  -9    2.76    0.41
  -6  -2   9    3.57    0.53
   6   2  -9    2.58    0.51
  -6   2   9    2.66    0.39
  -3  -2   9    4.62    0.61
   3   2  -9    5.71    0.68
   2   2  -9    5.14    0.64
  -1  -2   9    5.73    0.67
   1   2  -9    5.36    0.54
  -1  -2  -9    0.36    0.16
   1  -2   9    0.58    0.24
   1   2   9    0.25    0.15
  -1   2  -9    0.27    0.16
   2  -2   9    0.31    0.22
  -2  -2  -9    0.00    0.04
  -2  -2  -9    0.24    0.15
  -2   2  -9    0.20    0.18
  -2   2  -9    0.01    0.04
   2   2   9    0.09    0.13
   3  -2   9    6.96    0.73
   3   2   9    6.52    0.61
  -4  -2  -9    7.03    0.70
   4  -2   9    5.56    0.70
  -4   2  -9    5.66    0.71
   4   2   9    6.67    0.63
   5  -2   9    5.82    0.75
  -5  -2  -9    6.92    0.83
  -5   2  -9    6.51    0.78
  -6  -2  -9    0.07    0.18
   6  -2   9   -0.18    0.12
  -6   2  -9    0.00    0.05
   6   2   9   -0.01    0.06
   7  -2   9    4.55    0.71
  -7  -2  -9    5.35    0.78
  -7   2  -9    4.58    0.64
   7   2   9    4.31    0.67
   8  -2   9    0.12    0.31
  -8  -2  -9    0.66    0.32
  -8   2  -9    0.06    0.18
   8   2   9    0.52    0.30
  -9  -2  -9    0.68    0.34
  -9   2  -9    0.81    0.31
   9   2   9    1.11    0.41
  10  -2   9    0.07    0.28
 -10  -2  -9    0.21    0.28
 -10   2  -9    0.17    0.24
  10   2   9    0.28    0.34
 -15   3   9    0.12    0.22
  14  -3  -9    0.95    0.41
 -14  -3   9    0.56    0.35
  14   3  -9    0.57    0.41
 -14   3   9    0.51    0.27
 -13  -3   9    0.03    0.23
  13  -3  -9    0.71    0.38
 -13   3   9    0.78    0.28
  13   3  -9    0.04    0.37
 -12  -3   9   -0.11    0.20
  12  -3  -9   -0.09    0.23
 -12   3   9    0.23    0.20
  12   3  -9    0.08    0.30
  11  -3  -9    0.69    0.40
 -11  -3   9    0.27    0.21
 -11   3   9    0.07    0.16
  11   3  -9    0.66    0.37
 -10  -3   9    1.30    0.36
  10  -3  -9    1.08    0.43
  10   3  -9    0.84    0.37
 -10   3   9    0.49    0.20
  -9  -3   9    1.08    0.33
   9  -3  -9    0.63    0.35
   8  -3  -9   13.22    1.13
  -8  -3   9   11.83    0.92
  -8  -3   9   10.36    0.96
   8  -3  -9   11.07    0.89
  -7  -3   9    9.96    0.85
   7  -3  -9    8.74    0.73
  -7   3   9    9.54    0.68
   7   3  -9    6.30    0.87
   6  -3  -9    3.71    0.47
  -6  -3   9    5.42    0.63
  -6   3   9    4.26    0.49
   6   3  -9    3.17    0.61
  -5  -3   9   10.15    0.84
   5  -3  -9    9.87    0.75
  -5   3   9    8.74    0.66
   5   3  -9    8.03    0.94
  -4  -3   9   23.88    1.60
   4  -3  -9   23.92    1.51
  -4   3   9   23.13    1.37
   4   3  -9   22.44    1.55
  -4   3   9   23.45    1.69
  -3  -3   9   26.67    1.74
   3  -3  -9   23.61    1.61
  -3   3   9   27.87    1.85
   3   3  -9   24.76    1.65
  -3   3   9   26.28    1.47
  -2  -3   9    4.20    0.57
   2  -3  -9    5.37    0.49
   2   3  -9    4.11    0.60
  -2   3   9    4.31    0.40
  -2   3   9    5.04    0.52
  -1  -3   9    1.70    0.36
   1  -3  -9    1.85    0.30
  -1   3   9    1.53    0.30
   1   3  -9    1.64    0.38
  -1   3   9    1.56    0.27
   0  -3  -9   10.67    0.80
   0  -3   9   10.93    0.90
   0   3  -9    9.17    0.81
   0   3   9    9.68    0.71
  -1  -3  -9    6.24    0.59
   1  -3   9    6.97    0.70
  -1   3  -9    6.60    0.75
  -2  -3  -9   -0.01    0.05
  -2  -3  -9   -0.08    0.13
   2  -3   9    0.23    0.20
   2  -3   9    0.02    0.04
  -2   3  -9    0.01    0.07
   2   3   9    0.02    0.11
   3  -3   9    1.31    0.41
  -3  -3  -9    1.53    0.39
   3  -3   9    1.42    0.35
   4  -3   9    1.25    0.33
  -4  -3  -9    0.37    0.25
   5  -3   9    0.09    0.18
  -5  -3  -9    0.28    0.23
  -5   3  -9    0.28    0.20
   5   3   9    0.30    0.21
  -6  -3  -9    2.36    0.50
   6  -3   9    2.50    0.50
   6   3   9    2.47    0.48
  -6   3  -9    3.68    0.57
  -7  -3  -9    0.64    0.34
   7  -3   9    0.31    0.27
   7   3   9    0.79    0.32
  -7   3  -9    0.09    0.23
   8  -3   9    0.49    0.34
  -8  -3  -9    1.15    0.41
  -8   3  -9    1.02    0.35
   8   3   9    0.54    0.29
  -9  -3  -9    0.58    0.32
  -9   3  -9    0.48    0.25
   9   3   9    0.59    0.34
 -13  -4   9    0.26    0.28
  13  -4  -9   -0.10    0.28
  13   4  -9   -0.16    0.31
 -13   4   9   -0.01    0.17
  12  -4  -9    0.13    0.29
 -12  -4   9   -0.19    0.20
 -12   4   9   -0.04    0.16
  12   4  -9    0.14    0.36
 -11  -4   9    0.46    0.25
  11  -4  -9    0.57    0.41
  11   4  -9    0.21    0.30
 -11   4   9    0.50    0.21
 -10  -4   9    0.14    0.21
  10  -4  -9    0.26    0.30
 -10   4   9    0.36    0.22
  10   4  -9    1.01    0.42
  -9  -4   9    0.25    0.20
   9  -4  -9    0.19    0.29
   9   4  -9    0.10    0.27
  -9   4   9    0.32    0.16
  -8  -4   9    1.37    0.33
   8  -4  -9    1.76    0.52
   8   4  -9    1.58    0.44
  -8   4   9    1.28    0.27
  -7  -4   9    0.70    0.25
   7  -4  -9    1.32    0.43
  -7   4   9    1.02    0.25
   7   4  -9    1.75    0.46
  -6  -4   9    0.28    0.19
   6  -4  -9    0.22    0.21
   6   4  -9    0.53    0.27
  -6   4   9    0.45    0.18
   5  -4  -9    0.00    0.07
  -5  -4   9   -0.02    0.05
  -5   4   9    0.13    0.12
   5   4  -9    0.22    0.24
  -5   4   9    0.01    0.04
  -4  -4   9    0.03    0.05
   4  -4  -9    0.03    0.06
  -4   4   9    0.19    0.15
   4   4  -9    0.51    0.24
   3   4  -9    0.93    0.29
   3   4  -9    0.96    0.32
  -3   4   9    1.34    0.26
   2  -4  -9    0.04    0.05
  -2  -4   9    0.01    0.04
  -2   4   9    0.21    0.14
   2   4  -9    0.17    0.17
   2   4  -9    0.38    0.23
  -1   4   9    0.93    0.22
   1   4  -9    0.98    0.31
   0   4  -9    7.05    0.81
   1  -4   9    0.66    0.23
  -1  -4  -9    0.71    0.26
   1   4   9    0.89    0.22
  -1   4  -9    1.10    0.31
   2  -4   9    2.89    0.47
  -2  -4  -9    3.49    0.54
  -2   4  -9    3.20    0.51
   2   4   9    2.84    0.42
   3  -4   9    1.61    0.36
  -3  -4  -9    2.34    0.44
  -3   4  -9    1.25    0.35
   3   4   9    0.72    0.25
   4  -4   9    0.16    0.21
  -4  -4  -9   -0.04    0.18
  -4   4  -9    0.21    0.20
   4   4   9    0.15    0.17
   5  -4   9    0.36    0.25
  -5  -4  -9    1.33    0.37
   5   4   9    0.77    0.28
  -5   4  -9    0.82    0.27
   6  -4   9    0.83    0.36
  -6  -4  -9    0.88    0.36
  -6   4  -9    0.80    0.28
   6   4   9    0.34    0.21
   7  -4   9    0.46    0.32
  -7  -4  -9    0.63    0.32
  -7   4  -9    0.53    0.26
   7   4   9    0.82    0.33
  -8  -4  -9    0.12    0.24
  -8   4  -9    0.31    0.24
   8   4   9    0.25    0.27
 -12   5   9    0.09    0.20
 -11  -5   9    0.10    0.25
  11  -5  -9    0.77    0.45
  11   5  -9   -0.25    0.22
 -11   5   9    0.12    0.16
 -10  -5   9   -0.06    0.19
  10  -5  -9   -0.16    0.32
  10   5  -9    0.31    0.28
 -10   5   9    0.05    0.13
   9  -5  -9    0.25    0.33
  -9  -5   9    0.03    0.22
  -9   5   9    0.13    0.16
   9   5  -9   -0.11    0.24
   8  -5  -9    0.09    0.29
  -8  -5   9    0.07    0.18
   8   5  -9   -0.11    0.22
  -8   5   9    0.12    0.15
  -7  -5   9    0.75    0.27
   7  -5  -9    0.55    0.35
   7   5  -9    0.70    0.33
  -7   5   9    0.62    0.19
  -6  -5   9    0.97    0.28
   6  -5  -9    1.04    0.40
  -6   5   9    1.31    0.27
   6   5  -9    0.96    0.38
   5  -5  -9    0.25    0.23
  -5  -5   9    0.61    0.25
   5   5  -9    0.28    0.24
  -5   5   9    0.30    0.16
   4  -5  -9    1.71    0.40
  -4  -5   9    1.17    0.27
  -4   5   9    1.29    0.25
   4   5  -9    1.84    0.45
  -3  -5   9    0.97    0.27
   3  -5  -9    1.26    0.36
   3   5  -9    1.78    0.42
  -3   5   9    1.11    0.24
   2  -5  -9    0.16    0.21
  -2  -5   9   -0.11    0.13
  -2   5   9    0.41    0.16
  -2   5   9    0.03    0.04
   2   5  -9    0.08    0.05
   2   5  -9    0.37    0.24
  -1  -5   9    2.26    0.39
   1  -5  -9    2.32    0.42
  -1   5   9    2.49    0.35
   1   5  -9    2.26    0.46
   0  -5   9    1.23    0.28
   0  -5  -9    0.95    0.28
   0   5   9    1.47    0.29
   0   5  -9    2.34    0.44
  -1  -5  -9    2.05    0.42
   1  -5   9    2.08    0.40
  -1   5  -9    2.55    0.46
   1   5   9    2.05    0.34
  -2  -5  -9    0.14    0.22
   2  -5   9    0.04    0.19
  -2   5  -9    0.10    0.16
   2   5   9    0.04    0.13
  -3  -5  -9    0.21    0.24
   3  -5   9    0.31    0.25
  -3   5  -9    0.36    0.23
   3   5   9    0.40    0.20
   4  -5   9    0.38    0.26
  -4  -5  -9    0.02    0.20
  -4   5  -9    0.06    0.13
   4   5   9   -0.04    0.16
   5  -5   9    0.79    0.32
  -5  -5  -9    0.67    0.32
   5   5   9    0.51    0.23
  -5   5  -9    0.84    0.29
  -6  -5  -9    0.53    0.32
   6  -5   9    0.81    0.38
  -6   5  -9    0.45    0.24
   6   5   9    0.72    0.31
   9   6  -9    0.25    0.31
  -9   6   9    0.10    0.17
  -8   6   9    0.00    0.15
   8   6  -9    0.06    0.28
  -7   6   9    0.59    0.22
   7   6  -9    0.11    0.28
  -6   6   9    0.87    0.24
   6   6  -9    0.93    0.38
  -5   6   9    0.34    0.20
   5   6  -9    0.76    0.35
   4   6  -9    0.15    0.27
  -4   6   9   -0.01    0.05
  -4   6   9    0.17    0.17
   3   6  -9    0.32    0.25
  -3   6   9    0.25    0.16
   2   6  -9    0.04    0.06
   2   6  -9   -0.11    0.19
  -2   6   9    0.06    0.14
  -2   6   9    0.00    0.05
  -1   6   9    0.00    0.05
   1   6  -9    0.37    0.28
  -1   6   9    0.06    0.16
   0   6  -9   -0.04    0.17
   0   6   9    0.11    0.16
   0   6   9   -0.02    0.04
   1   6   9    0.05    0.16
  -1   6  -9   -0.02    0.17
   2   6   9    0.15    0.18
  -2   6  -9    0.14    0.21
   3   6   9   -0.01    0.17
  -3   6  -9    0.00    0.16
 -16   0  10    0.35    0.35
  16   0 -10    0.06    0.41
  15   0 -10   -0.08    0.33
 -15   0  10   -0.12    0.25
  14   0 -10    0.33    0.35
 -14   0  10    0.08    0.27
 -13   0  10    0.19    0.23
  13   0 -10    0.07    0.30
 -12   0  10    2.00    0.47
  12   0 -10    2.09    0.59
  11   0 -10    0.08    0.30
 -11   0  10    0.29    0.25
  11   0 -10    0.00    0.09
 -11   0  10    0.00    0.05
  10   0 -10   10.73    1.29
  -9   0  10    0.12    0.14
   9   0 -10    0.12    0.17
  -9   0  10    0.01    0.04
   9   0 -10   -0.06    0.08
  -6   0  10    0.98    0.26
   6   0 -10    0.41    0.24
   6   0 -10    0.03    0.07
  -5   0  10   -0.01    0.03
   5   0 -10    0.02    0.06
   5   0 -10   -0.09    0.11
  -5   0  10   -0.08    0.09
   4   0 -10    5.06    0.70
   3   0 -10    6.29    0.79
   2   0 -10    4.51    0.64
  -2   0  10    4.35    0.45
   1   0 -10    0.46    0.22
  -1   0  10    1.07    0.26
   0   0 -10    2.39    0.47
   0   0  10    3.00    0.44
  -1   0 -10    0.00    0.04
   1   0  10    0.01    0.04
  -1   0 -10    0.02    0.12
   1   0  10    0.06    0.09
  -2   0 -10   -0.01    0.14
   2   0  10    0.01    0.04
  -2   0 -10    0.00    0.05
   2   0  10    0.01    0.12
   5   0  10   -0.06    0.16
  -5   0 -10   -0.05    0.06
  -5   0 -10   -0.21    0.16
   5   0  10   -0.05    0.05
   6   0  10    1.35    0.37
  -6   0 -10    1.43    0.44
   7   0  10    0.29    0.26
  -7   0 -10    0.38    0.28
   8   0  10    0.23    0.28
  -8   0 -10    0.00    0.24
  -9   0 -10    0.52    0.34
 -10   0 -10   -0.20    0.29
  10   0  10    0.16    0.30
 -15  -1  10    1.82    0.51
  15  -1 -10    1.01    0.53
 -15   1  10    0.96    0.40
  15   1 -10    1.88    0.67
  15   1 -10    0.82    0.54
 -15   1  10    1.34    0.39
 -14  -1  10   -0.17    0.20
  14  -1 -10    0.10    0.30
 -14   1  10   -0.08    0.24
 -14   1  10    0.05    0.20
  14   1 -10    0.14    0.33
  14   1 -10   -0.05    0.38
  13  -1 -10    0.83    0.46
 -13  -1  10    0.17    0.29
  13   1 -10    0.95    0.48
  13   1 -10    0.64    0.35
 -13   1  10    0.10    0.10
 -13   1  10    0.51    0.33
 -12  -1  10    0.66    0.28
  12  -1 -10    1.23    0.51
  12   1 -10    0.73    0.42
 -12   1  10    0.67    0.33
  11  -1 -10    6.08    0.96
 -11  -1  10    5.18    0.71
  11   1 -10    3.83    0.76
 -11   1  10    4.39    0.62
  10  -1 -10    0.12    0.24
 -10  -1  10    0.20    0.23
  10   1 -10    0.06    0.20
 -10   1  10    0.03    0.04
  10   1 -10   -0.03    0.08
 -10   1  10    0.08    0.13
   9  -1 -10    3.81    0.71
  -9  -1  10    5.60    0.68
   9   1 -10    4.86    0.77
  -9   1  10    4.79    0.62
  -8  -1  10    2.82    0.46
   8  -1 -10    1.31    0.41
  -8   1  10    2.40    0.41
   8   1 -10    1.48    0.43
   7  -1 -10   10.58    0.96
  -7  -1  10    8.33    0.74
   7   1 -10    9.94    0.90
  -7   1  10    8.94    0.74
   6  -1 -10    0.85    0.32
   6  -1 -10    0.01    0.07
  -6  -1  10    0.74    0.23
   6   1 -10    0.45    0.22
  -6   1  10    0.38    0.19
   5  -1 -10    7.20    0.89
   5  -1 -10    6.68    0.70
  -3   1  10    7.72    0.63
   2  -1 -10    3.50    0.47
  -2  -1  10    2.98    0.51
   2  -1 -10    2.93    0.53
  -2  -1  10    2.61    0.41
  -2   1  10    3.30    0.45
   2   1 -10    3.49    0.53
   1  -1 -10    7.31    0.71
   1  -1 -10    6.83    0.63
  -1  -1  10    6.39    0.60
  -1  -1  10    7.85    0.81
  -1   1  10    6.97    0.59
   1   1 -10    6.62    0.65
   0  -1  10    5.18    0.61
   0  -1 -10    4.59    0.65
   0   1 -10    4.03    0.57
   0   1  10    4.39    0.45
  -1  -1 -10    1.85    0.42
   1  -1  10    1.42    0.32
   1   1  10    2.37    0.41
  -1   1 -10    1.34    0.32
  -2  -1 -10    2.69    0.49
   2  -1  10    2.50    0.45
   2   1  10    2.92    0.48
  -2   1 -10    1.92    0.39
  -3  -1 -10    0.77    0.27
   3  -1  10    1.24    0.32
   3   1  10    1.40    0.33
  -3   1 -10    0.88    0.28
   4  -1  10    2.70    0.50
  -4  -1 -10    2.14    0.47
  -4   1 -10    2.09    0.44
   4   1  10    2.36    0.44
  -5  -1 -10    3.20    0.60
   5  -1  10    3.49    0.57
   5   1  10    3.14    0.53
  -5   1 -10    3.14    0.55
   6  -1  10   -0.22    0.18
  -6  -1 -10    0.00    0.20
  -6   1 -10    0.05    0.19
   6   1  10    0.00    0.06
   6   1  10    0.10    0.23
  -6   1 -10   -0.01    0.06
  -7  -1 -10    1.25    0.42
   7  -1  10    1.51    0.46
  -7   1 -10    1.07    0.39
   7   1  10    1.09    0.41
  -8  -1 -10    0.67    0.36
   8  -1  10    0.15    0.31
   8   1  10    0.03    0.26
  -8   1 -10    0.10    0.19
  -8   1 -10    0.18    0.29
  -9  -1 -10    0.91    0.41
   9   1  10    1.51    0.49
  -9   1 -10    0.97    0.45
   9   1  10    0.63    0.43
  -9   1 -10    1.59    0.43
 -10  -1 -10    0.76    0.38
  10  -1  10    0.22    0.38
 -10   1 -10    0.33    0.39
  10   1  10    0.29    0.38
  10   1  10    0.36    0.39
 -15  -2  10   -0.05    0.27
  15  -2 -10    0.36    0.39
 -15   2  10   -0.05    0.24
  15   2 -10    0.13    0.42
  14  -2 -10    0.12    0.33
 -14  -2  10    0.56    0.32
  14   2 -10    0.06    0.36
 -14   2  10    0.87    0.31
 -13  -2  10    0.51    0.30
  13  -2 -10    0.26    0.33
  13   2 -10   -0.11    0.33
 -13   2  10    0.53    0.27
 -12  -2  10    2.93    0.54
  12  -2 -10    2.49    0.64
 -12   2  10    3.74    0.54
  12   2 -10    2.83    0.63
 -11  -2  10    1.06    0.35
  11  -2 -10    1.26    0.48
 -10  -2  10    0.59    0.26
  10  -2 -10    1.21    0.45
  10   2 -10    0.10    0.21
   9  -2 -10    3.48    0.70
  -9  -2  10    2.24    0.46
   9   2 -10    2.98    0.57
   8  -2 -10    2.69    0.59
  -8  -2  10    2.25    0.45
   8   2 -10    3.59    0.62
  -7  -2  10    0.84    0.29
   7  -2 -10   -0.05    0.07
   7  -2 -10    0.26    0.17
   7   2 -10   -0.04    0.08
  -7   2  10    0.29    0.17
   7   2 -10    0.61    0.28
   6  -2 -10   -0.09    0.11
  -6  -2  10   -0.02    0.04
   6  -2 -10   -0.01    0.06
  -6  -2  10   -0.02    0.18
  -6   2  10    0.08    0.11
   6   2 -10    0.03    0.06
  -6   2  10   -0.01    0.03
   6   2 -10    0.25    0.19
  -5  -2  10    6.74    0.78
  -2  -2  10    6.12    0.72
   1  -2 -10    0.25    0.15
  -1  -2  10    0.46    0.25
   1   2 -10    1.19    0.31
  -1   2  10    0.60    0.19
   0  -2 -10    1.99    0.34
   0  -2  10    1.74    0.37
   0   2 -10    1.48    0.35
   0   2  10    1.44    0.30
  -1  -2 -10    1.06    0.28
   1  -2  10    1.27    0.36
  -1   2 -10    1.18    0.32
   1   2  10    1.25    0.31
  -2  -2 -10    4.50    0.62
  -3  -2 -10    4.20    0.66
   3  -2  10    4.39    0.63
  -3   2 -10    4.84    0.67
   4  -2  10    2.27    0.46
  -4  -2 -10    2.21    0.50
  -5  -2 -10    3.64    0.65
   5  -2  10    3.78    0.65
  -6  -2 -10    2.42    0.53
   6  -2  10    2.55    0.52
   6   2  10    1.63    0.40
  -6   2 -10    2.38    0.47
  -7  -2 -10    0.77    0.36
   7  -2  10    0.97    0.41
  -7   2 -10    0.98    0.33
   7   2  10    0.74    0.29
   8  -2  10    0.81    0.38
  -8  -2 -10    0.75    0.33
  -8   2 -10    0.45    0.27
   8   2  10    1.36    0.42
  -9  -2 -10    0.92    0.39
  -9   2 -10    1.07    0.34
   9   2  10    0.95    0.40
 -14  -3  10    0.81    0.36
  14  -3 -10    0.07    0.39
  14   3 -10    1.00    0.51
 -14   3  10    0.97    0.35
  13  -3 -10    0.29    0.35
 -13  -3  10    0.49    0.30
  13   3 -10    0.50    0.44
 -13   3  10    0.22    0.21
 -12  -3  10    0.19    0.26
  12  -3 -10   -0.05    0.31
  12   3 -10    0.58    0.39
 -12   3  10    0.39    0.24
 -11  -3  10    0.48    0.29
  11  -3 -10    0.80    0.45
 -11   3  10    0.36    0.20
  11   3 -10    0.24    0.31
  10  -3 -10    0.30    0.36
 -10  -3  10    0.54    0.28
 -10   3  10    0.29    0.19
  10   3 -10    0.63    0.35
  -9  -3  10    0.76    0.29
   9  -3 -10    0.29    0.32
   9   3 -10    0.28    0.24
  -9   3  10    0.13    0.08
   8  -3 -10    4.27    0.74
  -8  -3  10    2.75    0.48
  -7  -3  10    3.44    0.51
  -7  -3  10    5.21    0.71
   7  -3 -10    3.56    0.64
   6  -3 -10    3.95    0.49
  -6  -3  10    2.01    0.39
  -6  -3  10    3.29    0.52
  -5  -3  10    1.33    0.37
   5  -3 -10    1.26    0.28
   5   3 -10    0.43    0.27
  -5   3  10    0.67    0.22
   4  -3 -10    0.05    0.06
   4  -3 -10    0.83    0.24
  -4  -3  10    0.36    0.24
  -4   3  10    0.59    0.19
   4   3 -10    0.18    0.20
  -3  -3  10    0.49    0.24
   3  -3 -10    0.38    0.18
  -3   3  10    0.29    0.15
   3   3 -10    0.04    0.17
  -2  -3  10    7.71    0.77
   2  -3 -10    7.51    0.67
   2   3 -10    7.37    0.85
  -2   3  10    7.75    0.59
   1  -3 -10    6.49    0.60
  -1  -3  10    6.20    0.74
   1   3 -10    5.85    0.74
  -1   3  10    5.57    0.50
   0  -3 -10    1.44    0.31
   0  -3  10    1.41    0.36
   0   3  10    1.78    0.31
   1  -3  10    8.01    0.82
   1  -3  10    7.98    0.71
  -1  -3 -10    8.36    0.79
  -2  -3 -10    4.49    0.65
   2  -3  10    3.07    0.50
  -3  -3 -10    1.34    0.38
   3  -3  10    1.04    0.35
  -4  -3 -10    1.64    0.44
   4  -3  10    0.80    0.31
   4   3  10    0.68    0.23
  -4   3 -10    0.96    0.30
   5  -3  10    0.52    0.30
  -5  -3 -10    1.00    0.38
  -5   3 -10    0.63    0.26
   5   3  10    0.26    0.19
   6  -3  10    0.71    0.31
  -6  -3 -10    1.86    0.47
  -6   3 -10    1.37    0.39
   6   3  10    1.83    0.42
  -7  -3 -10    0.38    0.30
   7  -3  10    0.91    0.39
  -7   3 -10    0.46    0.30
   7   3  10    0.40    0.26
   8  -3  10    0.37    0.28
  -8  -3 -10    0.27    0.29
   8   3  10    0.93    0.35
  -8   3 -10    0.50    0.28
 -13  -4  10    0.46    0.32
  13  -4 -10    0.42    0.42
 -13   4  10    0.18    0.19
  13   4 -10    0.05    0.36
 -12  -4  10    0.17    0.24
  12  -4 -10    0.41    0.39
 -12   4  10    0.19    0.23
  12   4 -10    0.12    0.35
  11  -4 -10   -0.08    0.28
 -11  -4  10    0.23    0.27
  11   4 -10    0.27    0.35
 -11   4  10   -0.10    0.16
  10  -4 -10    0.51    0.38
 -10  -4  10    0.63    0.30
  10   4 -10   -0.04    0.28
 -10   4  10    0.10    0.13
   9  -4 -10    0.13    0.27
  -9  -4  10    0.11    0.21
   9   4 -10   -0.07    0.26
  -9   4  10    0.01    0.11
   8  -4 -10    0.60    0.35
  -8  -4  10    0.78    0.27
   8   4 -10    0.23    0.33
  -8   4  10    0.39    0.18
   7  -4 -10    4.06    0.72
  -7   4  10    4.45    0.54
   7   4 -10    4.62    0.76
  -6  -4  10    4.45    0.58
   6  -4 -10    4.84    0.73
  -6   4  10    4.11    0.50
   6   4 -10    4.72    0.75
  -5  -4  10    4.61    0.58
   5  -4 -10    4.66    0.75
   5   4 -10    4.01    0.67
  -5   4  10    4.30    0.52
   4  -4 -10    3.11    0.57
  -4  -4  10    1.99    0.37
   4   4 -10    1.97    0.49
  -4   4  10    2.05    0.34
   3  -4 -10    2.75    0.52
  -3  -4  10    1.71    0.35
  -3   4  10    2.63    0.37
   3   4 -10    2.23    0.49
  -2  -4  10    1.79    0.35
   2  -4 -10    2.05    0.46
  -2   4  10    1.33    0.26
   2   4 -10    1.06    0.34
   1  -4 -10    0.85    0.32
  -1  -4  10    0.55    0.23
  -1   4  10    0.30    0.16
   1   4 -10    0.34    0.25
   0  -4  10    6.99    0.66
   0  -4 -10    7.80    0.74
   0   4 -10    6.90    0.83
   1  -4  10    4.50    0.60
  -1  -4 -10    4.95    0.68
   1   4  10    3.86    0.50
  -1   4 -10    4.40    0.63
  -2  -4 -10    0.15    0.20
   2  -4  10    0.09    0.17
  -2   4 -10    0.06    0.18
   2   4  10    0.07    0.14
  -3  -4 -10    1.48    0.40
   3  -4  10    0.89    0.29
   3   4  10    1.14    0.30
  -3   4 -10    0.98    0.31
  -4  -4 -10    0.69    0.29
   4  -4  10    0.84    0.31
   4   4  10    0.61    0.26
  -4   4 -10    0.41    0.22
  -5  -4 -10    2.32    0.52
   5  -4  10    2.09    0.49
  -5   4 -10    2.58    0.50
   5   4  10    1.38    0.37
   6  -4  10   -0.05    0.24
  -6  -4 -10   -0.06    0.21
  -6   4 -10    0.07    0.17
   6   4  10    0.26    0.25
  -7  -4 -10    0.03    0.22
   7  -4  10   -0.06    0.25
   7   4  10    0.34    0.26
  -7   4 -10    0.04    0.21
  11  -5 -10   -0.01    0.36
 -11  -5  10   -0.12    0.23
  11   5 -10   -0.04    0.27
 -11   5  10    0.14    0.17
  10  -5 -10    0.03    0.36
 -10  -5  10    0.19    0.26
 -10   5  10    0.10    0.18
  10   5 -10    0.15    0.31
  -9  -5  10    0.04    0.21
   9  -5 -10    0.03    0.31
  -9   5  10    0.00    0.15
   9   5 -10   -0.15    0.24
  -8  -5  10   -0.06    0.18
   8  -5 -10    0.19    0.36
  -8   5  10    0.12    0.15
   8   5 -10   -0.08    0.24
   7  -5 -10    0.26    0.29
  -7  -5  10    0.09    0.19
   7   5 -10   -0.34    0.24
  -7   5  10   -0.01    0.12
  -6  -5  10    0.41    0.25
   6  -5 -10    0.37    0.31
   6   5 -10   -0.03    0.24
  -6   5  10   -0.04    0.11
  -5  -5  10    0.38    0.23
   5  -5 -10    0.26    0.29
  -5   5  10    0.18    0.14
   5   5 -10    0.04    0.24
  -4  -5  10    1.45    0.32
   4  -5 -10    1.84    0.44
   4   5 -10    1.60    0.43
  -4   5  10    1.51    0.30
   3  -5 -10    0.16    0.24
  -3  -5  10    0.17    0.21
  -3   5  10   -0.04    0.11
   3   5 -10    0.24    0.22
  -2  -5  10    0.32    0.22
   2  -5 -10    0.35    0.26
   2   5 -10    0.01    0.19
  -2   5  10    0.21    0.14
   1  -5 -10   -0.08    0.18
  -1  -5  10    0.13    0.20
   1   5 -10   -0.13    0.15
  -1   5  10    0.14    0.14
   0  -5 -10    0.29    0.25
   0  -5  10    0.18    0.19
   0   5  10    0.30    0.15
   0   5 -10    0.00    0.15
  -1  -5 -10   -0.03    0.20
   1  -5  10    0.02    0.20
  -1   5 -10    0.18    0.20
   1   5  10    0.05    0.13
   2  -5  10    0.54    0.27
  -2  -5 -10    0.51    0.28
  -2   5 -10    1.57    0.40
   2   5  10    0.60    0.24
   3  -5  10    0.44    0.27
  -3  -5 -10    0.07    0.25
  -3   5 -10    0.15    0.20
   3   5  10    0.07    0.18
  -4  -5 -10    0.31    0.27
   4  -5  10    0.36    0.29
   4   5  10    0.04    0.17
  -4   5 -10    0.17    0.22
   5  -5  10    0.28    0.32
  -5  -5 -10    0.70    0.35
   5   5  10    0.41    0.24
  -5   5 -10    0.42    0.24
  -8   6  10    0.43    0.19
   7   6 -10   -0.13    0.21
  -7   6  10    0.07    0.15
  -6   6  10    0.28    0.20
   6   6 -10    0.65    0.36
   5   6 -10    0.20    0.25
  -5   6  10    0.25    0.17
  -4   6  10    0.77    0.23
   4   6 -10    0.58    0.31
  -3   6  10    0.29    0.18
   3   6 -10    0.44    0.28
  -2   6  10    0.27    0.17
   2   6 -10    0.35    0.25
  -1   6  10    1.40    0.30
   1   6 -10    2.03    0.45
   0   6 -10    1.37    0.39
   0   6  10    1.19    0.29
  -1   6 -10    0.56    0.27
   1   6  10    0.83    0.26
   2   6  10    0.15    0.21
  -2   6 -10    0.33    0.23
 -15   0  11    1.29    0.46
  15   0 -11    1.09    0.53
 -14   0  11   -0.07    0.27
  14   0 -11    0.31    0.39
  13   0 -11    0.19    0.37
 -13   0  11   -0.10    0.23
 -12   0  11    0.14    0.23
  12   0 -11   -0.18    0.28
 -11   0  11    0.02    0.06
 -11   0  11    0.02    0.23
  11   0 -11   -0.03    0.25
  11   0 -11   -0.10    0.10
 -10   0  11    0.01    0.05
 -10   0  11    0.15    0.20
  10   0 -11   -0.06    0.10
  10   0 -11   -0.19    0.25
   9   0 -11    0.69    0.37
  -9   0  11    1.05    0.30
  -8   0  11    1.26    0.31
   8   0 -11    1.26    0.40
   7   0 -11    5.29    0.80
  -7   0  11    3.53    0.52
   5   0 -11    0.04    0.06
  -5   0  11   -0.03    0.11
   5   0 -11   -0.03    0.16
  -5   0  11   -0.01    0.04
   4   0 -11    8.89    1.04
  -2   0  11    0.00    0.04
  -2   0  11    0.05    0.11
   2   0 -11    0.06    0.14
   2   0 -11   -0.01    0.05
  -1   0  11    0.53    0.19
   1   0 -11    0.36    0.22
   0   0 -11    6.00    0.77
   1   0  11    0.97    0.28
  -1   0 -11    0.91    0.31
   2   0  11    0.98    0.31
  -2   0 -11    0.95    0.30
   3   0  11    0.01    0.05
  -3   0 -11    0.13    0.24
  -3   0 -11    0.00    0.06
   3   0  11    0.23    0.21
   4   0  11    0.12    0.19
   4   0  11    0.01    0.05
  -4   0 -11   -0.11    0.20
  -4   0 -11    0.00    0.05
   5   0  11   -0.06    0.06
   5   0  11   -0.10    0.15
  -5   0 -11   -0.05    0.18
  -5   0 -11   -0.05    0.06
  -6   0 -11    0.17    0.23
   6   0  11    0.04    0.22
  -7   0 -11    0.22    0.30
   7   0  11    0.07    0.25
  -8   0 -11    0.38    0.31
   8   0  11    0.59    0.38
  -9   0 -11    4.38    0.81
  15  -1 -11    0.49    0.49
 -15  -1  11    0.47    0.34
 -15   1  11    0.11    0.23
  15   1 -11    0.72    0.52
  15   1 -11    0.15    0.50
 -14  -1  11    0.05    0.26
  14  -1 -11   -0.01    0.34
  14   1 -11   -0.12    0.35
 -14   1  11    0.04    0.22
  14   1 -11   -0.14    0.37
 -14   1  11    0.31    0.35
  13  -1 -11    0.50    0.40
 -13  -1  11    0.07    0.22
  13   1 -11    0.03    0.37
 -13   1  11    0.26    0.19
  13   1 -11    0.07    0.37
 -13   1  11    0.62    0.33
 -12  -1  11    0.78    0.35
  12  -1 -11   -0.03    0.25
 -12   1  11    0.02    0.05
 -12   1  11    0.57    0.31
  12   1 -11   -0.12    0.30
  12   1 -11   -0.07    0.10
 -11  -1  11    2.66    0.50
  11  -1 -11    1.54    0.51
  11   1 -11    2.80    0.66
 -11   1  11    2.34    0.47
  10  -1 -11    2.28    0.59
 -10  -1  11    1.91    0.40
 -10   1  11    2.23    0.44
  10   1 -11    2.26    0.55
  -9  -1  11    0.66    0.28
   9  -1 -11    0.97    0.42
  -9   1  11    0.59    0.21
   9   1 -11    0.45    0.26
  -8  -1  11    7.36    0.73
   8  -1 -11    9.69    0.95
   8   1 -11    7.41    0.98
  -8   1  11    8.42    0.73
  -7  -1  11   14.47    1.08
   7  -1 -11   12.94    1.20
   7   1 -11   14.27    1.19
  -7   1  11   14.90    1.05
   6  -1 -11    0.65    0.29
  -6  -1  11    0.65    0.24
   6   1 -11    1.57    0.40
  -6   1  11    1.46    0.31
   5  -1 -11    1.28    0.38
  -5  -1  11    1.11    0.30
   5   1 -11    1.03    0.35
  -5   1  11    0.59    0.20
   4  -1 -11    0.60    0.29
  -4  -1  11    0.67    0.24
  -4   1  11    0.83    0.24
   4   1 -11    0.99    0.33
  -3  -1  11    0.87    0.25
   3  -1 -11    0.91    0.32
   3   1 -11    1.39    0.34
  -3   1  11    1.58    0.32
  -2  -1  11    3.27    0.47
   2  -1 -11    2.67    0.52
  -2   1  11    4.06    0.51
   2   1 -11    3.07    0.53
   1  -1 -11    1.85    0.42
  -1  -1  11    1.63    0.34
   1   1 -11    2.37    0.45
  -1   1  11    2.60    0.42
   0  -1  11    0.00    0.10
   0  -1 -11   -0.07    0.13
   0   1  11    0.00    0.04
   0   1  11    0.00    0.09
   0   1 -11   -0.09    0.12
   0   1 -11    0.05    0.05
  -1  -1 -11    0.25    0.20
   1  -1  11    0.66    0.22
   1   1  11    0.95    0.28
  -1   1 -11    0.79    0.27
  -2  -1 -11    5.95    0.79
   2  -1  11    4.29    0.61
  -2   1 -11    5.01    0.68
   2   1  11    6.40    0.73
   3  -1  11    1.54    0.38
  -3  -1 -11    1.47    0.39
   3   1  11    2.30    0.44
  -3   1 -11    1.15    0.34
  -4  -1 -11    1.41    0.41
   4  -1  11    2.17    0.45
   4   1  11    2.18    0.47
  -4   1 -11    2.88    0.55
   5  -1  11    2.18    0.48
  -5  -1 -11    1.63    0.44
  -5   1 -11    1.78    0.48
   5   1  11    1.83    0.47
   6  -1  11    1.19    0.39
  -6  -1 -11    1.04    0.37
  -6   1 -11    0.08    0.17
  -6   1 -11    0.62    0.32
   6   1  11    1.80    0.49
   6   1  11    0.29    0.20
   7  -1  11    1.54    0.47
  -7  -1 -11    1.57    0.50
  -7   1 -11    1.09    0.46
   7   1  11    0.86    0.31
   7   1  11    1.61    0.49
  -7   1 -11    1.20    0.37
   8  -1  11    0.58    0.39
  -8  -1 -11    0.27    0.32
   8   1  11    0.55    0.34
  -8   1 -11    0.17    0.25
   8   1  11    0.48    0.43
  -8   1 -11   -0.17    0.28
  -9  -1 -11    1.49    0.50
   9   1  11    1.25    0.47
  -9   1 -11    1.22    0.47
   9   1  11    1.12    0.51
 -15  -2  11    0.27    0.28
  15  -2 -11    0.75    0.50
 -15   2  11    0.62    0.32
  15   2 -11    0.88    0.57
  14  -2 -11    0.55    0.38
 -14  -2  11    0.06    0.25
 -14   2  11    0.22    0.23
  14   2 -11    0.21    0.35
 -13  -2  11    0.46    0.29
  13  -2 -11    0.90    0.50
  13   2 -11   -0.32    0.30
 -13   2  11    0.89    0.31
 -12  -2  11    0.12    0.24
  12  -2 -11   -0.07    0.30
 -12   2  11    0.05    0.16
  12   2 -11    0.04    0.35
 -11  -2  11    0.28    0.25
  11  -2 -11    0.10    0.31
 -11   2  11    0.17    0.18
  11   2 -11   -0.01    0.26
 -10  -2  11    1.97    0.42
  10  -2 -11    0.79    0.41
   9  -2 -11    4.76    0.85
  -9  -2  11    5.50    0.70
   9   2 -11    5.67    0.88
  -8  -2  11   13.15    1.05
   8   2 -11   13.77    1.15
  -7  -2  11   10.61    0.90
   7  -2 -11   11.07    1.06
   6  -2 -11    1.31    0.34
   6   2 -11    3.62    0.57
   5   2 -11    4.93    0.72
   4  -2 -11    0.38    0.18
  -4  -2  11    1.05    0.32
  -4   2  11    0.44    0.20
   4   2 -11    0.70    0.28
   3  -2 -11    4.98    0.59
  -3  -2  11    5.51    0.75
   3   2 -11    4.55    0.65
   2  -2 -11    2.72    0.42
  -2  -2  11    1.75    0.42
   2   2 -11    2.00    0.41
  -2   2  11    2.53    0.40
  -1   2  11    1.37    0.27
   1   2 -11    1.10    0.32
   0  -2  11   10.45    0.87
   0  -2 -11    9.90    0.93
   0   2  11   11.18    0.87
   0   2 -11   10.62    0.90
  -1  -2 -11    4.46    0.68
   1  -2  11    3.04    0.51
  -1   2 -11    3.23    0.56
   2  -2  11    2.32    0.46
  -2  -2 -11    3.12    0.56
  -2   2 -11    2.28    0.47
  -3  -2 -11    4.72    0.74
   3  -2  11    5.03    0.72
  -4  -2 -11    2.51    0.53
   4  -2  11    1.78    0.45
   4   2  11    0.76    0.24
  -4   2 -11    1.48    0.37
  -5  -2 -11   -0.03    0.25
   5  -2  11    0.00    0.20
   5   2  11    0.05    0.17
  -5   2 -11    0.24    0.22
   6  -2  11    0.48    0.34
  -6  -2 -11    1.02    0.39
  -6   2 -11    0.79    0.30
   6   2  11    0.90    0.33
  -7  -2 -11   -0.18    0.17
   7  -2  11   -0.01    0.23
   7   2  11    0.05    0.22
  -7   2 -11   -0.15    0.20
  -8  -2 -11    0.24    0.30
   8  -2  11    0.57    0.39
  -8   2 -11    0.20    0.22
   8   2  11   -0.04    0.26
  14  -3 -11    0.32    0.39
 -14  -3  11   -0.10    0.21
 -14   3  11   -0.03    0.20
  14   3 -11    0.56    0.44
  13  -3 -11    0.04    0.33
 -13  -3  11    0.28    0.25
 -13   3  11    0.45    0.23
  13   3 -11    0.53    0.48
  12  -3 -11    0.23    0.38
 -12  -3  11    0.30    0.24
  12   3 -11    0.67    0.45
 -12   3  11    0.52    0.25
 -11  -3  11    1.46    0.40
  11  -3 -11    0.85    0.46
 -11   3  11    1.00    0.28
  11   3 -11    0.37    0.37
  10  -3 -11   -0.07    0.26
 -10  -3  11    0.16    0.21
  10   3 -11    0.01    0.26
 -10   3  11    0.26    0.17
   9  -3 -11    0.97    0.45
  -9  -3  11    1.42    0.38
  -9   3  11    1.91    0.36
   9   3 -11    1.91    0.54
   8  -3 -11    1.08    0.42
  -8  -3  11    1.96    0.42
   8   3 -11    1.26    0.44
  -8   3  11    1.78    0.34
  -7  -3  11    3.24    0.52
   7  -3 -11    3.92    0.72
   6  -3 -11    5.33    0.82
  -6  -3  11    3.42    0.53
   5  -3 -11    2.46    0.53
  -5  -3  11    1.71    0.38
   4  -3 -11    8.33    1.03
  -4  -3  11   10.44    0.98
  -4  -3  11    9.81    0.82
  -3  -3  11    1.16    0.37
  -3  -3  11    1.22    0.31
   3  -3 -11    1.04    0.37
   2  -3 -11    1.46    0.41
  -2  -3  11    1.47    0.32
   1  -3 -11    8.37    0.99
  -1  -3 -11    4.09    0.66
   1  -3  11    4.04    0.58
   2  -3  11    4.07    0.61
  -2  -3 -11    3.23    0.57
   2   3  11    2.54    0.40
  -2   3 -11    2.64    0.51
   3  -3  11    1.61    0.43
  -3  -3 -11    0.86    0.35
   3   3  11    1.10    0.31
  -3   3 -11    0.94    0.30
   4  -3  11    0.03    0.21
  -4  -3 -11    0.13    0.23
   4   3  11    0.39    0.23
  -4   3 -11    0.15    0.16
   5  -3  11    0.03    0.24
  -5  -3 -11    0.46    0.30
   5   3  11    0.35    0.27
  -5   3 -11    0.24    0.21
  -6  -3 -11   -0.09    0.20
   6  -3  11   -0.07    0.20
   6   3  11    0.04    0.21
  -6   3 -11   -0.03    0.18
   7  -3  11    0.53    0.35
  -7  -3 -11    1.14    0.43
  -7   3 -11    1.92    0.47
   7   3  11    1.05    0.35
 -12  -4  11    0.05    0.26
  12  -4 -11   -0.26    0.31
 -12   4  11   -0.01    0.19
  12   4 -11    0.21    0.36
 -11  -4  11    0.15    0.24
  11  -4 -11    0.71    0.48
  11   4 -11    0.29    0.34
 -11   4  11    0.19    0.20
 -10  -4  11   -0.01    0.23
  10  -4 -11    0.44    0.36
 -10   4  11    0.48    0.22
  10   4 -11    0.46    0.36
   9  -4 -11    0.38    0.32
  -9  -4  11   -0.08    0.19
   9   4 -11   -0.12    0.29
  -9   4  11    0.19    0.14
   8  -4 -11    0.06    0.31
  -8  -4  11    0.02    0.20
   8   4 -11    0.21    0.30
  -8   4  11   -0.07    0.14
  -7  -4  11    0.20    0.20
   7  -4 -11    0.02    0.27
   7   4 -11    0.01    0.20
  -7   4  11   -0.06    0.12
  -6  -4  11    2.52    0.46
   6  -4 -11    3.20    0.65
  -6   4  11    3.14    0.44
   6   4 -11    2.21    0.55
  -5  -4  11    0.24    0.22
   5  -4 -11    0.19    0.24
  -5   4  11    0.31    0.17
   5   4 -11   -0.08    0.17
  -4  -4  11    2.41    0.43
   4  -4 -11    2.78    0.56
  -4   4  11    1.92    0.34
   4   4 -11    2.80    0.56
  -3  -4  11    1.09    0.32
   3  -4 -11    1.48    0.41
  -3   4  11    0.31    0.16
   3   4 -11    1.00    0.34
  -2  -4  11    0.12    0.19
   2  -4 -11    0.36    0.26
  -2   4  11    0.20    0.17
   2   4 -11    0.23    0.20
  -1  -4  11    3.79    0.56
   1  -4 -11    5.73    0.78
  -1   4  11    4.13    0.52
   1   4 -11    4.59    0.69
   0  -4 -11    1.88    0.44
   0  -4  11    1.31    0.33
   0   4 -11    2.62    0.51
   0   4  11    1.52    0.30
   1  -4  11    0.06    0.17
  -1  -4 -11    0.05    0.21
  -1   4 -11   -0.08    0.16
   1   4  11    0.19    0.16
  -2  -4 -11    0.20    0.22
   2  -4  11    0.16    0.21
   2   4  11    0.00    0.16
  -2   4 -11    0.16    0.20
   3  -4  11    2.69    0.50
  -3  -4 -11    3.69    0.60
  -3   4 -11    2.92    0.53
   3   4  11    2.63    0.44
   4  -4  11    0.13    0.24
  -4  -4 -11    0.84    0.35
   4   4  11    0.63    0.29
  -4   4 -11    0.89    0.33
   5  -4  11    0.48    0.30
  -5  -4 -11    0.33    0.29
  -5   4 -11    0.47    0.28
   5   4  11    0.15    0.20
   6  -4  11    0.91    0.40
  -6  -4 -11    0.34    0.32
   6   4  11    1.13    0.34
  -6   4 -11    1.38    0.40
 -10  -5  11   -0.03    0.24
  10  -5 -11    0.27    0.38
 -10   5  11    0.05    0.16
  10   5 -11    0.04    0.28
   9  -5 -11    0.70    0.45
  -9  -5  11    0.85    0.34
   9   5 -11    0.84    0.40
  -9   5  11    0.86    0.28
   8  -5 -11    0.77    0.43
  -8  -5  11    1.06    0.33
  -8   5  11    0.80    0.25
   8   5 -11    1.53    0.48
  -7  -5  11    0.01    0.22
   7  -5 -11   -0.01    0.30
   7   5 -11    0.29    0.33
  -7   5  11   -0.04    0.12
   6  -5 -11    0.94    0.40
  -6  -5  11    0.39    0.23
   6   5 -11    0.53    0.34
  -6   5  11    0.28    0.19
   5  -5 -11    0.74    0.36
  -5  -5  11    0.55    0.26
  -5   5  11    0.89    0.25
   5   5 -11    0.42    0.34
   4  -5 -11    0.15    0.24
  -4  -5  11    0.38    0.25
   4   5 -11    0.23    0.29
  -4   5  11    0.22    0.15
   3  -5 -11    0.20    0.27
  -3  -5  11    0.27    0.22
  -3   5  11    0.23    0.15
   3   5 -11   -0.04    0.22
   2  -5 -11    0.97    0.36
  -2  -5  11    0.77    0.28
   2   5 -11    0.56    0.30
  -2   5  11    0.48    0.18
   1  -5 -11    0.29    0.24
  -1  -5  11    0.12    0.20
   1   5 -11   -0.07    0.18
  -1   5  11    0.16    0.16
   0  -5  11    0.40    0.24
   0  -5 -11    0.21    0.26
   0   5  11    0.32    0.20
   0   5 -11    0.06    0.19
   1  -5  11    0.87    0.29
  -1  -5 -11    0.82    0.34
   1   5  11    0.88    0.25
  -1   5 -11    0.33    0.25
  -2  -5 -11    0.86    0.35
   2  -5  11    0.73    0.30
   2   5  11    0.52    0.22
  -2   5 -11    0.78    0.33
   3  -5  11    0.90    0.33
  -3  -5 -11    0.35    0.30
  -3   5 -11    0.62    0.27
   3   5  11    0.25    0.22
  -4  -5 -11    0.78    0.37
   4  -5  11    1.27    0.41
   4   5  11    0.64    0.26
  -4   5 -11    0.74    0.28
  -6   6  11    0.06    0.16
   6   6 -11    0.69    0.35
   5   6 -11    0.51    0.29
  -5   6  11   -0.01    0.16
   4   6 -11   -0.06    0.20
  -4   6  11    0.01    0.16
   3   6 -11   -0.06    0.19
  -3   6  11    0.09    0.16
   2   6 -11    0.29    0.26
  -2   6  11    0.03    0.16
   1   6 -11    0.22    0.25
  -1   6  11    0.56    0.23
   0   6  11    0.48    0.21
  15   0 -12    1.22    0.60
 -15   0  12    0.44    0.36
 -14   0  12    0.17    0.27
  14   0 -12    0.08    0.35
  13   0 -12    0.04    0.35
 -13   0  12    0.31    0.26
 -12   0  12    1.84    0.43
  12   0 -12    3.39    0.77
 -11   0  12   -0.07    0.22
  11   0 -12    0.31    0.36
  10   0 -12    1.17    0.49
 -10   0  12    1.36    0.37
  -9   0  12   -0.04    0.05
   9   0 -12   -0.01    0.26
  -9   0  12    0.66    0.29
   9   0 -12    0.02    0.09
  -8   0  12    0.30    0.19
   8   0 -12    0.29    0.29
   8   0 -12    0.01    0.08
   5   0 -12    0.18    0.18
   5   0 -12   -0.02    0.06
  -5   0  12   -0.08    0.10
  -5   0  12   -0.01    0.04
  -4   0  12    2.81    0.45
   4   0 -12    2.86    0.57
  -3   0  12    4.55    0.58
   3   0 -12    3.52    0.61
  -2   0  12    4.18    0.57
   2   0 -12    4.36    0.67
  -1   0  12   -0.04    0.11
   1   0 -12    0.21    0.20
   1   0 -12    0.02    0.06
  -1   0  12    0.00    0.05
   0   0  12    1.74    0.35
   0   0 -12    1.33    0.38
  -1   0 -12    1.26    0.37
   1   0  12    1.25    0.35
   2   0  12    1.81    0.38
  -2   0 -12    2.11    0.49
  -3   0 -12    2.64    0.56
   3   0  12    2.87    0.52
   4   0  12    0.08    0.22
  -4   0 -12    0.34    0.28
   4   0  12    0.01    0.06
   5   0  12    0.45    0.29
  -5   0 -12    0.61    0.32
   6   0  12    0.45    0.31
  -6   0 -12    0.04    0.21
  -7   0 -12    0.30    0.34
   7   0  12    0.16    0.28
   8   0  12    0.08    0.32
  -8   0 -12   -0.18    0.24
  15  -1 -12    0.64    0.54
 -15  -1  12    0.16    0.32
  15   1 -12    1.42    0.61
 -14  -1  12    2.43    0.58
  14  -1 -12    1.55    0.67
 -14   1  12    1.23    0.42
 -14   1  12    1.71    0.42
  14   1 -12    2.15    0.71
  14   1 -12    2.07    0.69
 -13  -1  12    1.85    0.50
  13  -1 -12    2.27    0.71
  13   1 -12    1.79    0.62
  13   1 -12    2.23    0.73
 -13   1  12    2.02    0.51
 -13   1  12    1.60    0.38
  12  -1 -12    0.86    0.48
 -12  -1  12    0.41    0.30
  12   1 -12    0.52    0.40
 -12   1  12    0.27    0.29
 -12   1  12    0.43    0.24
  12   1 -12    0.58    0.41
  11  -1 -12    0.45    0.38
 -11  -1  12    0.80    0.33
 -11   1  12    1.25    0.39
  11   1 -12    1.48    0.57
 -10  -1  12    0.23    0.20
  10  -1 -12   -0.08    0.26
  10   1 -12    0.10    0.32
  10   1 -12    0.05    0.11
 -10   1  12    0.10    0.22
 -10   1  12    0.01    0.05
   9  -1 -12    9.37    1.17
  -9  -1  12    7.27    0.77
   9   1 -12    9.91    1.18
  -9   1  12    9.50    0.80
  -8  -1  12    4.98    0.71
   8  -1 -12    4.98    0.83
  -8   1  12    5.60    0.68
   8   1 -12    6.11    0.90
   7  -1 -12    1.71    0.49
  -7  -1  12    1.38    0.37
   7   1 -12    1.45    0.41
  -7   1  12    0.98    0.28
   6  -1 -12    0.95    0.39
  -6  -1  12    1.24    0.34
   6   1 -12    1.94    0.47
  -6   1  12    1.34    0.31
   5  -1 -12   13.48    1.18
  -5  -1  12   14.64    1.06
  -5   1  12   13.80    1.02
   5   1 -12   12.07    1.10
  -4  -1  12   15.25    1.09
   4  -1 -12   12.62    1.16
   4   1 -12   14.21    1.16
  -4   1  12   13.65    1.02
  -3  -1  12    3.44    0.54
   3  -1 -12    3.73    0.66
   3   1 -12    3.80    0.62
  -3   1  12    3.78    0.50
  -2  -1  12    0.58    0.23
   2  -1 -12    0.94    0.34
   2   1 -12    0.61    0.25
  -2   1  12    0.84    0.24
   1  -1 -12    1.10    0.32
  -1  -1  12    1.76    0.37
  -1   1  12    1.75    0.34
   1   1 -12    1.71    0.45
   0  -1  12    2.43    0.43
   0  -1 -12    1.65    0.42
   0   1  12    2.27    0.40
   0   1 -12    1.79    0.44
  -1  -1 -12    5.26    0.78
   1  -1  12    6.55    0.67
   1   1  12    6.80    0.66
  -1   1 -12    6.09    0.81
   2  -1  12    0.00    0.16
  -2  -1 -12   -0.10    0.20
   2   1  12    0.20    0.16
   2   1  12   -0.01    0.05
  -2   1 -12    0.07    0.23
  -2   1 -12    0.00    0.06
  -3  -1 -12    1.25    0.41
   3  -1  12    0.85    0.34
   3   1  12    1.04    0.36
   4  -1  12    1.73    0.42
  -4  -1 -12    2.36    0.54
   4   1  12    0.95    0.34
  -4   1 -12    2.70    0.59
  -5  -1 -12    0.24    0.29
   5  -1  12    0.26    0.26
   5   1  12   -0.18    0.23
  -5   1 -12   -0.10    0.15
  -5   1 -12    0.03    0.26
   5   1  12    0.10    0.25
  -6  -1 -12    0.04    0.24
   6  -1  12   -0.05    0.23
   6   1  12   -0.04    0.28
  -6   1 -12   -0.06    0.22
   6   1  12    0.05    0.27
  -6   1 -12   -0.02    0.20
  -7  -1 -12   -0.03    0.28
   7  -1  12   -0.17    0.27
   7   1  12    0.37    0.34
  -7   1 -12    0.07    0.28
  -7   1 -12    0.05    0.23
   7   1  12   -0.01    0.34
  -8  -1 -12    0.42    0.37
   8  -1  12    1.33    0.56
   8   1  12    0.27    0.33
   8   1  12    0.69    0.48
  -8   1 -12    0.35    0.34
  14  -2 -12    0.32    0.42
 -14  -2  12    0.26    0.30
 -14   2  12   -0.09    0.21
  14   2 -12    0.25    0.44
 -13  -2  12    0.09    0.24
  13  -2 -12    0.58    0.44
 -13   2  12    0.40    0.24
  13   2 -12   -0.05    0.33
  12  -2 -12    0.52    0.41
 -12  -2  12    0.48    0.26
 -12   2  12    1.09    0.36
  12   2 -12    0.64    0.44
  11  -2 -12    0.42    0.41
 -11  -2  12    0.24    0.28
  11   2 -12    0.23    0.38
 -11   2  12    0.28    0.19
  10  -2 -12    0.53    0.38
 -10  -2  12    0.55    0.29
  10   2 -12    0.84    0.44
 -10   2  12    0.70    0.24
  -9  -2  12    0.93    0.30
   9  -2 -12    1.55    0.54
   8  -2 -12    1.32    0.46
  -8  -2  12    0.50    0.25
   8   2 -12   -0.01    0.09
  -7  -2  12    4.08    0.61
   7  -2 -12    4.26    0.75
   7   2 -12    3.24    0.61
   6  -2 -12    0.26    0.30
  -6  -2  12    0.84    0.29
   6   2 -12   -0.05    0.08
   6   2 -12    0.43    0.24
   5  -2 -12    3.85    0.66
  -5  -2  12    3.21    0.50
   5   2 -12    3.22    0.58
   4  -2 -12    1.69    0.49
  -4  -2  12    1.52    0.36
   4   2 -12    2.21    0.48
  -3  -2  12    3.51    0.54
   3  -2 -12    3.77    0.67
   3   2 -12    3.87    0.61
   2  -2 -12    6.26    0.87
  -2  -2  12    6.03    0.63
   2   2 -12    6.82    0.83
  -1  -2  12    4.03    0.57
   1  -2 -12    4.00    0.68
   1   2 -12    4.47    0.66
   0  -2 -12    5.44    0.77
   0  -2  12    5.04    0.65
   0   2 -12    5.56    0.76
   1  -2  12    0.00    0.17
  -1  -2 -12   -0.20    0.15
   1   2  12   -0.03    0.05
  -1   2 -12    0.00    0.06
   2  -2  12    5.60    0.75
  -2  -2 -12    5.10    0.79
   3  -2  12    1.34    0.40
  -3  -2 -12    0.70    0.34
   3   2  12    0.48    0.23
  -3   2 -12    1.46    0.37
   4  -2  12    1.20    0.39
  -4  -2 -12    1.39    0.44
  -4   2 -12    0.56    0.28
   4   2  12    0.81    0.31
   5  -2  12    0.85    0.34
  -5  -2 -12    0.52    0.35
  -5   2 -12    0.59    0.30
   5   2  12    0.65    0.27
   6  -2  12    0.25    0.27
  -6  -2 -12    0.10    0.28
   6   2  12    0.04    0.24
  -6   2 -12    0.07    0.21
  -7  -2 -12    0.21    0.28
   7  -2  12    0.08    0.27
   7   2  12    0.10    0.30
  -7   2 -12    0.25    0.25
  13  -3 -12    0.24    0.46
 -13  -3  12    0.08    0.23
  13   3 -12    1.00    0.53
 -13   3  12    0.81    0.30
  12  -3 -12   -0.01    0.31
 -12  -3  12    0.10    0.25
 -12   3  12    0.11    0.16
  12   3 -12   -0.24    0.31
 -11  -3  12    0.42    0.28
  11  -3 -12    0.19    0.39
 -11   3  12    0.11    0.17
  11   3 -12   -0.21    0.30
  10  -3 -12    0.10    0.34
 -10  -3  12    0.19    0.21
  10   3 -12   -0.18    0.29
 -10   3  12    0.15    0.18
   9  -3 -12    0.19    0.28
  -9  -3  12    0.12    0.20
  -9   3  12    0.04    0.12
   9   3 -12    0.08    0.26
   8  -3 -12    2.93    0.67
  -8  -3  12    3.69    0.60
  -8   3  12    3.06    0.47
   8   3 -12    3.74    0.72
  -7  -3  12    4.52    0.64
   7  -3 -12    3.89    0.75
   7   3 -12    3.50    0.71
  -7   3  12    3.56    0.52
  -6  -3  12    3.13    0.54
   6  -3 -12    2.82    0.60
   6   3 -12    2.77    0.62
  -6   3  12    3.49    0.49
   5  -3 -12    1.02    0.40
  -5  -3  12    0.72    0.25
   5   3 -12    0.33    0.21
  -4  -3  12    4.53    0.62
   4  -3 -12    4.79    0.77
  -3  -3  12    1.57    0.36
   3  -3 -12    0.44    0.29
   2  -3 -12    0.62    0.31
  -2  -3  12    0.76    0.29
   2   3 -12    0.45    0.21
   1  -3 -12    0.09    0.18
  -1  -3  12    0.25    0.22
  -1   3  12    0.38    0.19
   1   3 -12    0.29    0.25
   0  -3  12    0.01    0.16
   0  -3 -12   -0.05    0.17
   0   3 -12   -0.24    0.19
   0   3  12    0.12    0.16
   1  -3  12    0.47    0.25
  -1  -3 -12    0.67    0.29
   1   3  12    0.23    0.17
  -1   3 -12    0.72    0.30
  -2  -3 -12    1.17    0.41
   2  -3  12    1.86    0.44
   2   3  12    0.94    0.28
  -2   3 -12    1.16    0.34
   3  -3  12    1.02    0.36
  -3  -3 -12    0.02    0.25
   3   3  12    0.25    0.20
  -3   3 -12    0.99    0.36
  -4  -3 -12    5.22    0.79
   4  -3  12    2.76    0.55
  -4   3 -12    2.36    0.50
   4   3  12    2.47    0.46
   5  -3  12    0.35    0.30
  -5  -3 -12    0.19    0.29
  -5   3 -12   -0.01    0.23
   5   3  12    0.19    0.22
  -6  -3 -12    0.69    0.34
   6  -3  12    0.28    0.35
  -6   3 -12    0.49    0.28
   6   3  12   -0.09    0.27
  12  -4 -12    0.45    0.46
 -12  -4  12    0.32    0.32
 -12   4  12    0.04    0.17
  12   4 -12   -0.09    0.32
 -11  -4  12   -0.17    0.23
  11  -4 -12    0.03    0.34
 -11   4  12    0.31    0.21
  11   4 -12    0.09    0.36
  10  -4 -12    0.18    0.36
 -10  -4  12    0.16    0.23
  10   4 -12    0.49    0.40
 -10   4  12    0.08    0.21
  -9  -4  12    1.08    0.35
   9  -4 -12    0.57    0.39
   9   4 -12    0.52    0.37
  -9   4  12    1.48    0.36
   8  -4 -12    1.72    0.56
  -8  -4  12    0.96    0.35
  -8   4  12    0.73    0.24
   8   4 -12    0.96    0.43
   7  -4 -12    0.58    0.34
  -7  -4  12    0.23    0.22
   7   4 -12    0.04    0.19
  -7   4  12    0.10    0.18
   6  -4 -12    1.64    0.51
  -6  -4  12    1.82    0.41
  -6   4  12    0.76    0.26
   6   4 -12    0.85    0.39
   5  -4 -12    6.27    0.93
  -5   4  12    5.91    0.57
   5   4 -12    5.98    0.88
  -4  -4  12    0.24    0.20
   4  -4 -12    0.10    0.21
   4   4 -12    0.10    0.20
  -4   4  12   -0.17    0.12
   3  -4 -12    0.12    0.21
  -3  -4  12    0.01    0.18
  -3   4  12    0.03    0.14
   3   4 -12    0.01    0.21
   2  -4 -12    3.19    0.58
  -2  -4  12    1.35    0.35
   2   4 -12    1.68    0.45
  -2   4  12    1.49    0.32
  -1  -4  12    0.16    0.21
   1  -4 -12   -0.10    0.21
   1   4 -12    0.02    0.21
  -1   4  12    0.09    0.16
   0  -4  12    0.12    0.19
   0  -4 -12    0.38    0.26
   0   4  12    0.06    0.13
   0   4 -12    0.19    0.16
   1  -4  12    0.08    0.23
  -1  -4 -12    0.35    0.28
  -1   4 -12    0.20    0.22
   1   4  12    0.12    0.15
  -2  -4 -12   -0.05    0.20
   2  -4  12    0.29    0.26
  -2   4 -12    0.48    0.27
   2   4  12    0.05    0.20
   3  -4  12    0.12    0.23
  -3  -4 -12    1.27    0.43
   3   4  12    0.03    0.19
  -3   4 -12    0.32    0.24
   4  -4  12    0.01    0.22
  -4  -4 -12    0.01    0.27
  -4   4 -12   -0.13    0.16
   4   4  12    0.00    0.23
   5  -4  12    1.18    0.43
  -5  -4 -12    0.66    0.37
   5   4  12    0.60    0.31
  -5   4 -12    0.47    0.28
  -9  -5  12    0.08    0.26
   9  -5 -12    0.19    0.36
  -9   5  12    0.56    0.24
   9   5 -12    0.60    0.37
  -8  -5  12    0.22    0.28
   8  -5 -12    0.43    0.37
   8   5 -12   -0.02    0.24
  -8   5  12    0.35    0.21
  -7  -5  12    1.37    0.38
   7  -5 -12    1.19    0.47
   7   5 -12    0.78    0.40
  -7   5  12    1.45    0.34
  -6  -5  12    0.29    0.23
   6  -5 -12    0.32    0.35
   6   5 -12   -0.09    0.26
  -6   5  12    0.10    0.15
   5  -5 -12    0.03    0.28
  -5  -5  12    0.07    0.21
   5   5 -12    0.19    0.23
  -5   5  12   -0.20    0.11
  -4  -5  12    0.78    0.28
   4  -5 -12    1.08    0.40
   4   5 -12    0.08    0.23
  -4   5  12    0.18    0.18
   3  -5 -12    0.13    0.28
  -3  -5  12    0.11    0.20
  -3   5  12   -0.03    0.15
   3   5 -12    0.10    0.23
  -2  -5  12    0.83    0.32
   2  -5 -12    1.10    0.38
  -2   5  12    0.46    0.22
   2   5 -12    0.79    0.33
  -1  -5  12    0.92    0.32
   1  -5 -12    1.21    0.39
   1   5 -12    1.33    0.41
  -1   5  12    0.84    0.27
   0  -5  12    0.49    0.30
   0  -5 -12    0.92    0.41
   0   5 -12    0.46    0.28
   0   5  12   -0.05    0.14
   1  -5  12    0.00    0.23
  -1  -5 -12    0.35    0.28
  -1   5 -12    0.67    0.27
   1   5  12   -0.02    0.17
   2  -5  12    0.06    0.24
  -2  -5 -12    0.97    0.41
   2   5  12    0.23    0.21
  -2   5 -12    0.55    0.28
  14   0 -13    0.59    0.45
 -14   0  13    1.52    0.49
 -13   0  13    4.26    0.72
  13   0 -13    4.54    0.95
  12   0 -13    0.24    0.35
 -12   0  13    0.05    0.22
 -11   0  13    0.34    0.25
  11   0 -13    0.37    0.34
  10   0 -13    3.42    0.77
 -10   0  13    2.92    0.58
  -9   0  13    0.21    0.23
   9   0 -13   -0.01    0.11
  -9   0  13   -0.04    0.06
   9   0 -13    0.67    0.36
   8   0 -13    1.17    0.44
  -8   0  13    1.02    0.31
   7   0 -13    0.82    0.40
  -7   0  13    0.60    0.27
   6   0 -13    0.76    0.39
  -6   0  13    0.32    0.23
   6   0 -13    0.01    0.08
  -5   0  13    1.30    0.34
   5   0 -13    1.11    0.41
   4   0 -13    2.16    0.52
  -4   0  13    2.48    0.45
   3   0 -13    1.25    0.40
  -3   0  13    1.71    0.38
   2   0 -13    8.06    1.00
   0   0  13    6.38    0.77
  -1   0 -13    0.50    0.32
   1   0  13    0.61    0.29
  -2   0 -13    1.44    0.43
   2   0  13    0.78    0.30
   3   0  13    0.38    0.25
  -3   0 -13   -0.13    0.20
  -4   0 -13    1.24    0.42
   4   0  13    0.98    0.37
   5   0  13    0.28    0.32
  -5   0 -13    0.13    0.30
   6   0  13    0.87    0.40
  -6   0 -13    1.92    0.52
   7   0  13   -0.17    0.24
  -7   0 -13    0.21    0.36
  14  -1 -13    0.63    0.59
 -14  -1  13    0.06    0.28
  14   1 -13    0.68    0.56
  14   1 -13    0.32    0.51
 -14   1  13    0.26    0.29
 -13  -1  13    0.06    0.27
  13  -1 -13   -0.08    0.32
  13   1 -13    0.30    0.47
 -13   1  13   -0.08    0.27
  13   1 -13    0.26    0.43
 -13   1  13    0.29    0.27
  12  -1 -13    0.15    0.34
 -12  -1  13   -0.04    0.26
 -12   1  13    0.10    0.24
  12   1 -13    0.30    0.39
 -12   1  13    0.40    0.27
  12   1 -13    0.13    0.39
  11  -1 -13    0.68    0.48
 -11  -1  13   -0.07    0.25
 -11   1  13    0.29    0.24
  11   1 -13    0.08    0.33
 -11   1  13    0.26    0.26
  11   1 -13    0.11    0.29
 -10  -1  13    1.02    0.36
  10  -1 -13    0.45    0.32
 -10   1  13    0.80    0.32
  10   1 -13    1.11    0.49
  -9  -1  13    0.03    0.18
   9  -1 -13   -0.07    0.25
   9   1 -13    0.35    0.35
   9   1 -13   -0.01    0.10
  -9   1  13    0.17    0.25
  -9   1  13    0.01    0.05
  -8  -1  13    2.24    0.46
   8  -1 -13    1.68    0.53
  -8   1  13    2.29    0.46
   8   1 -13    3.69    0.72
  -7  -1  13    3.06    0.53
   7  -1 -13    3.98    0.76
  -7   1  13    3.85    0.57
   7   1 -13    3.24    0.68
  -6  -1  13    4.42    0.63
   6  -1 -13    5.22    0.85
  -6   1  13    3.38    0.50
   6   1 -13    3.25    0.63
  -5  -1  13    1.02    0.33
   5  -1 -13    1.26    0.43
   5   1 -13    1.10    0.38
  -5   1  13    1.43    0.34
  -4  -1  13    0.07    0.21
   4  -1 -13   -0.02    0.24
   4   1 -13    0.03    0.07
   4   1 -13    0.13    0.18
  -4   1  13    0.05    0.05
  -4   1  13   -0.05    0.12
   3  -1 -13    1.09    0.39
  -3  -1  13    0.78    0.30
   3   1 -13    0.72    0.29
  -3   1  13    0.95    0.28
  -2  -1  13    3.94    0.59
   2  -1 -13    4.02    0.68
  -2   1  13    3.45    0.53
   2   1 -13    2.05    0.47
   1  -1 -13    6.61    0.91
  -1  -1  13    7.24    0.72
   1   1 -13    6.81    0.90
  -1   1  13    8.16    0.71
   0  -1 -13    0.36    0.25
   0  -1  13    0.05    0.18
   0   1 -13    0.20    0.26
   0   1  13    0.01    0.05
   0   1  13    0.13    0.19
   0   1 -13    0.00    0.07
   1  -1  13    1.28    0.39
  -1  -1 -13    0.43    0.28
   1   1  13    1.79    0.41
  -1   1 -13    1.38    0.43
  -2  -1 -13    1.55    0.47
   2  -1  13    1.30    0.38
  -2   1 -13    1.46    0.44
   2   1  13    2.50    0.52
   3  -1  13    1.53    0.41
  -3  -1 -13    1.30    0.42
   3   1  13    0.54    0.22
  -3   1 -13    2.52    0.58
   3   1  13    1.65    0.44
  -4  -1 -13    1.06    0.42
   4  -1  13    1.04    0.37
  -4   1 -13    0.84    0.32
  -4   1 -13    1.00    0.41
   4   1  13    0.33    0.27
   4   1  13    1.22    0.42
  -5  -1 -13    0.45    0.33
   5  -1  13    1.02    0.40
  -5   1 -13    1.92    0.53
   5   1  13    0.22    0.27
  -5   1 -13    1.77    0.44
   5   1  13    1.28    0.45
   6  -1  13    1.69    0.54
  -6  -1 -13    1.51    0.51
   6   1  13    1.00    0.44
   6   1  13    0.51    0.36
  -6   1 -13    0.63    0.37
  -6   1 -13    0.96    0.38
   7  -1  13   -0.13    0.32
   7   1  13    0.07    0.30
  14  -2 -13    0.37    0.42
 -14   2  13    0.53    0.31
  14   2 -13    0.11    0.41
  13  -2 -13    0.34    0.39
 -13  -2  13    0.45    0.36
 -13   2  13    0.99    0.36
  13   2 -13    0.84    0.55
 -12  -2  13    0.15    0.26
  12  -2 -13    0.19    0.38
  12   2 -13    0.45    0.46
 -12   2  13    0.56    0.28
  11  -2 -13    0.26    0.39
 -11  -2  13    0.21    0.22
 -11   2  13    0.54    0.27
  11   2 -13    0.04    0.35
 -10  -2  13    1.36    0.40
  10  -2 -13    1.93    0.57
 -10   2  13    0.65    0.26
  10   2 -13    0.63    0.42
   9  -2 -13    0.24    0.35
  -9  -2  13    0.67    0.31
   9   2 -13    0.23    0.37
  -9   2  13    0.86    0.29
  -8  -2  13    7.77    0.77
   8  -2 -13    6.91    1.07
   8   2 -13    7.42    1.05
  -8   2  13    5.82    0.70
   7  -2 -13    4.22    0.82
  -7  -2  13    3.88    0.63
   6  -2 -13    0.54    0.31
  -6  -2  13    0.31    0.21
   6   2 -13    0.01    0.08
   5  -2 -13    4.66    0.78
  -5  -2  13    3.74    0.56
  -4  -2  13    1.35    0.35
   4  -2 -13    2.22    0.56
   4   2 -13    2.35    0.51
   3  -2 -13    1.66    0.44
  -3  -2  13    1.34    0.34
  -2  -2  13    1.74    0.41
   2  -2 -13    1.74    0.46
  -1  -2  13    1.06    0.33
   1  -2 -13    0.92    0.34
   0  -2 -13   -0.19    0.18
   0  -2  13    0.10    0.17
   0   2  13    0.03    0.08
   0   2 -13    0.02    0.18
   1  -2  13    0.20    0.23
  -1  -2 -13    0.67    0.32
  -1   2 -13    0.92    0.33
   1   2  13    0.19    0.20
  -2  -2 -13    0.90    0.38
   2  -2  13    0.26    0.22
  -2   2 -13    0.20    0.24
   2   2  13    0.38    0.24
  -3  -2 -13    0.27    0.27
   3  -2  13    0.32    0.29
   3   2  13   -0.14    0.17
  -3   2 -13    0.14    0.24
   4  -2  13    0.41    0.33
  -4  -2 -13    0.12    0.31
   4   2  13    0.05    0.21
  -4   2 -13    0.09    0.18
  -5  -2 -13    0.21    0.31
   5  -2  13    0.39    0.31
  -5   2 -13    0.48    0.29
   5   2  13    0.14    0.27
  -6  -2 -13    0.11    0.25
   6  -2  13    0.06    0.27
   6   2  13    0.24    0.32
  -6   2 -13    0.30    0.27
 -13   3  13    0.16    0.20
 -12  -3  13    0.33    0.24
  12  -3 -13    0.66    0.44
  12   3 -13    0.13    0.40
 -12   3  13    0.42    0.25
  11  -3 -13    0.35    0.41
 -11  -3  13    0.33    0.30
 -11   3  13    0.80    0.29
  11   3 -13    1.22    0.54
  10  -3 -13    1.23    0.49
 -10  -3  13    0.76    0.34
 -10   3  13    0.48    0.26
  10   3 -13    0.83    0.49
  -9  -3  13    1.31    0.38
   9  -3 -13    0.74    0.43
  -9   3  13    0.73    0.30
   9   3 -13    1.05    0.52
   8  -3 -13    0.60    0.38
  -8  -3  13    1.12    0.39
   8   3 -13    0.38    0.34
  -8   3  13    0.74    0.30
   7  -3 -13    0.37    0.34
  -7  -3  13    0.46    0.28
  -7   3  13    0.03    0.18
   7   3 -13    0.28    0.30
  -6  -3  13    1.31    0.34
   6  -3 -13    2.38    0.59
  -6   3  13    1.29    0.32
   6   3 -13    1.41    0.46
  -5  -3  13    3.29    0.55
   5  -3 -13    2.62    0.60
   5   3 -13    3.35    0.64
  -5   3  13    2.78    0.44
  -4  -3  13    0.65    0.28
   4  -3 -13    0.21    0.26
  -4   3  13    0.73    0.25
   4   3 -13    0.68    0.35
   3  -3 -13    1.17    0.38
  -3  -3  13    1.36    0.37
  -3   3  13    0.80    0.25
   3   3 -13    1.00    0.39
   2  -3 -13    2.06    0.53
  -2  -3  13    1.24    0.34
  -2   3  13    1.42    0.32
   2   3 -13    0.77    0.33
  -1  -3  13    0.00    0.20
   1  -3 -13   -0.10    0.18
   1   3 -13    0.12    0.25
  -1   3  13    0.25    0.19
   0  -3 -13   -0.09    0.21
   0  -3  13    0.02    0.16
   0   3 -13    0.56    0.27
   0   3  13    0.10    0.15
  -1  -3 -13    0.02    0.24
   1  -3  13   -0.03    0.17
   1   3  13    0.02    0.15
  -1   3 -13    0.15    0.22
  -2  -3 -13    0.89    0.40
   2  -3  13    0.34    0.27
  -2   3 -13    1.08    0.37
   2   3  13    0.35    0.26
  -3  -3 -13   -0.12    0.22
   3  -3  13   -0.01    0.21
   3   3  13    0.04    0.19
  -3   3 -13   -0.01    0.22
   4  -3  13   -0.24    0.16
  -4  -3 -13   -0.15    0.26
  -4   3 -13    0.27    0.22
   4   3  13   -0.07    0.20
   5  -3  13   -0.04    0.24
  -5  -3 -13    0.25    0.29
   5   3  13    0.34    0.28
  -5   3 -13    0.32    0.25
 -11  -4  13    0.59    0.35
  11  -4 -13    0.41    0.47
  11   4 -13    0.71    0.43
 -11   4  13    0.79    0.29
  10  -4 -13    0.65    0.46
 -10  -4  13    0.61    0.33
  10   4 -13    0.53    0.39
 -10   4  13    0.42    0.23
   9  -4 -13    0.25    0.41
  -9  -4  13    0.29    0.29
  -9   4  13    0.63    0.27
   9   4 -13    0.60    0.44
   8  -4 -13    1.16    0.49
  -8  -4  13    1.42    0.40
  -8   4  13    0.95    0.31
   8   4 -13    1.51    0.52
  -7  -4  13    0.86    0.34
   7  -4 -13    0.68    0.37
   7   4 -13    0.43    0.34
  -7   4  13    1.52    0.35
  -6  -4  13    0.36    0.26
   6  -4 -13   -0.15    0.25
   6   4 -13    0.05    0.27
  -6   4  13    0.07    0.17
   5  -4 -13    3.32    0.67
  -5  -4  13    2.40    0.47
   5   4 -13    2.39    0.56
  -5   4  13    2.87    0.44
  -4  -4  13    0.99    0.35
   4  -4 -13    1.27    0.41
   4   4 -13    0.82    0.34
  -4   4  13    0.53    0.22
   3  -4 -13    2.35    0.55
  -3  -4  13    1.37    0.37
   3   4 -13    1.01    0.38
  -3   4  13    0.97    0.27
   2  -4 -13    0.47    0.29
  -2  -4  13    0.10    0.20
  -2   4  13    0.07    0.17
   2   4 -13    0.17    0.24
  -1  -4  13    0.60    0.28
   1  -4 -13    0.28    0.27
   1   4 -13    0.10    0.25
  -1   4  13    0.56    0.23
   0  -4 -13    0.15    0.25
   0  -4  13    0.34    0.24
   0   4 -13    0.40    0.29
   0   4  13    0.50    0.22
  -1  -4 -13    0.16    0.28
   1  -4  13    0.06    0.23
   1   4  13    0.32    0.21
  -1   4 -13    0.04    0.19
  -2  -4 -13    0.42    0.29
   2  -4  13    0.15    0.26
  -2   4 -13    0.54    0.31
   2   4  13    0.30    0.25
   3  -4  13   -0.15    0.21
  -3  -4 -13    0.19    0.28
   3   4  13    0.08    0.23
  -3   4 -13    0.14    0.24
  -8   5  13    0.12    0.16
   7  -5 -13    0.78    0.44
  -7  -5  13    0.27    0.30
   7   5 -13    0.36    0.30
  -7   5  13    0.61    0.26
  -6  -5  13    0.14    0.26
   6  -5 -13    0.92    0.45
  -6   5  13    0.27    0.20
   6   5 -13    0.60    0.33
  -5  -5  13    0.62    0.34
   5  -5 -13    1.19    0.43
   5   5 -13    0.44    0.28
  -5   5  13    0.60    0.25
  -4  -5  13    0.09    0.26
   4  -5 -13    0.21    0.30
  -4   5  13    0.13    0.18
   4   5 -13    0.29    0.28
  -3  -5  13    0.48    0.30
   3  -5 -13   -0.02    0.26
   3   5 -13    0.43    0.26
  -3   5  13    0.27    0.22
   2  -5 -13    0.15    0.28
  -2  -5  13   -0.15    0.23
   2   5 -13    0.00    0.21
  -2   5  13    0.13    0.17
   1  -5 -13   -0.01    0.28
  -1  -5  13    0.08    0.23
   1   5 -13    0.23    0.21
  -1   5  13    0.23    0.20
   0  -5  13    0.41    0.28
   0  -5 -13    0.66    0.39
   0   5 -13    0.39    0.27
   0   5  13    0.39    0.18
  14   0 -14    0.31    0.49
 -14   0  14    1.41    0.50
 -13   0  14    0.98    0.38
  13   0 -14    0.96    0.48
 -12   0  14    0.00    0.28
  12   0 -14    0.36    0.42
 -11   0  14    0.62    0.34
  11   0 -14    0.27    0.36
 -10   0  14    0.86    0.36
  10   0 -14    0.74    0.42
  -9   0  14    0.04    0.19
   9   0 -14    0.18    0.31
  -8   0  14    0.97    0.33
   8   0 -14    0.75    0.38
   7   0 -14    0.04    0.10
   7   0 -14    0.12    0.24
  -7   0  14    0.17    0.23
  -7   0  14    0.04    0.06
  -6   0  14    1.66    0.43
   6   0 -14    1.91    0.55
   5   0 -14    2.13    0.58
  -5   0  14    2.19    0.47
   4   0 -14    1.20    0.42
  -4   0  14    1.69    0.40
  -3   0  14    0.00    0.05
  -3   0  14    0.30    0.22
   3   0 -14    0.01    0.07
   3   0 -14    0.30    0.30
   2   0 -14    4.78    0.80
  -2   0  14    5.67    0.75
   1   0 -14   -0.11    0.20
  -1   0  14   -0.04    0.05
   1   0 -14    0.01    0.07
  -1   0  14    0.11    0.21
   0   0 -14    0.59    0.31
   0   0  14    0.95    0.31
  -1   0 -14   -0.09    0.25
   1   0  14    0.08    0.18
   2   0  14    0.82    0.37
  -2   0 -14    0.14    0.25
   3   0  14    1.25    0.41
  -3   0 -14    1.27    0.44
   4   0  14    0.18    0.24
  -4   0 -14    0.02    0.30
  -5   0 -14    0.72    0.37
   5   0  14    0.75    0.41
  13  -1 -14    1.36    0.63
 -13  -1  14    1.40    0.49
  13   1 -14    1.27    0.59
  13   1 -14    0.32    0.48
 -13   1  14    1.44    0.41
  12  -1 -14    0.17    0.33
 -12  -1  14    0.20    0.25
 -12   1  14   -0.05    0.28
 -12   1  14    0.24    0.23
  12   1 -14    0.22    0.38
  12   1 -14   -0.17    0.34
  11  -1 -14    0.18    0.30
 -11  -1  14    0.10    0.29
  11   1 -14    1.43    0.52
 -11   1  14    0.28    0.29
  11   1 -14    0.05    0.33
 -11   1  14   -0.12    0.20
 -10  -1  14    0.42    0.27
  10  -1 -14    0.04    0.36
  10   1 -14   -0.29    0.29
 -10   1  14    0.45    0.26
 -10   1  14    0.05    0.27
  10   1 -14    0.60    0.37
  -9  -1  14    0.44    0.29
   9  -1 -14    1.10    0.50
   9   1 -14    0.76    0.42
  -9   1  14    0.96    0.34
   9   1 -14    0.10    0.18
   8  -1 -14    0.58    0.38
  -8  -1  14    0.37    0.25
   8   1 -14    0.54    0.36
   8   1 -14    0.03    0.11
  -8   1  14    0.35    0.26
  -7  -1  14    0.27    0.24
   7  -1 -14    0.23    0.31
   7   1 -14    0.90    0.44
  -7   1  14   -0.03    0.05
  -7   1  14    0.35    0.28
   7   1 -14   -0.04    0.09
  -6  -1  14    1.92    0.42
   6  -1 -14    2.06    0.56
   6   1 -14    1.71    0.48
  -6   1  14    2.12    0.44
   5  -1 -14    3.89    0.75
  -5  -1  14    3.62    0.59
   5   1 -14    4.58    0.78
  -5   1  14    4.92    0.66
  -4  -1  14    2.99    0.53
   4  -1 -14    2.55    0.59
  -4   1  14    2.80    0.48
   4   1 -14    1.95    0.52
  -3  -1  14    3.72    0.59
   3  -1 -14    5.17    0.82
   3   1 -14    6.64    0.89
  -3   1  14    5.33    0.71
  -2  -1  14    5.39    0.75
   2  -1 -14    5.86    0.88
  -2   1  14    5.83    0.71
   2   1 -14    4.41    0.75
  -1  -1  14    7.63    0.76
   1  -1 -14    5.92    0.94
  -1   1  14    8.20    0.77
   1   1 -14    6.92    0.92
   0  -1 -14    2.02    0.49
   0  -1  14    1.22    0.36
   0   1 -14    2.16    0.54
   0   1  14    1.67    0.41
  -1  -1 -14    0.14    0.25
   1  -1  14   -0.08    0.20
  -1   1 -14    0.03    0.23
   1   1  14    0.07    0.16
  -1   1 -14    0.16    0.18
   1   1  14    0.12    0.23
   2  -1  14    0.28    0.25
  -2  -1 -14    0.18    0.24
   2   1  14    0.45    0.26
  -2   1 -14    0.42    0.26
   2   1  14    0.10    0.27
  -2   1 -14    0.41    0.30
  -3  -1 -14    1.19    0.44
   3  -1  14    0.74    0.35
   3   1  14    0.91    0.38
  -3   1 -14    1.32    0.46
   3   1  14    0.91    0.33
  -3   1 -14    0.43    0.29
  -4  -1 -14    0.15    0.33
   4  -1  14   -0.15    0.24
  -4   1 -14    0.14    0.27
   4   1  14    0.16    0.31
   4   1  14    0.06    0.24
  -4   1 -14    0.66    0.43
  -5  -1 -14    0.16    0.32
   5  -1  14    0.53    0.36
  -5   1 -14    0.09    0.36
  -5   1 -14   -0.02    0.25
   5   1  14    0.23    0.31
   5   1  14    0.28    0.33
 -13  -2  14    0.29    0.32
  13  -2 -14    0.02    0.39
 -13   2  14    0.33    0.25
  13   2 -14    0.70    0.48
  12  -2 -14    0.47    0.41
 -12  -2  14    0.17    0.26
  12   2 -14    0.24    0.43
 -12   2  14    0.35    0.27
  11  -2 -14    0.58    0.45
 -11  -2  14    0.27    0.28
  11   2 -14    0.27    0.42
 -11   2  14    0.33    0.25
 -10  -2  14    0.33    0.27
  10  -2 -14   -0.07    0.31
 -10   2  14    0.13    0.24
  10   2 -14    0.32    0.37
   9  -2 -14    0.41    0.39
  -9  -2  14    0.35    0.28
  -9   2  14    0.29    0.22
   9   2 -14    0.65    0.46
  -8  -2  14    0.12    0.25
   8  -2 -14    0.02    0.33
  -8   2  14    0.54    0.27
   8   2 -14    0.46    0.35
  -7  -2  14    0.20    0.23
   7  -2 -14    0.12    0.29
   7   2 -14   -0.07    0.24
  -7   2  14    0.27    0.20
  -6  -2  14    0.20    0.23
   6  -2 -14    0.26    0.29
   6   2 -14   -0.21    0.25
  -6   2  14    0.08    0.17
  -5  -2  14    0.87    0.33
   5  -2 -14    0.33    0.33
   5   2 -14    0.58    0.32
  -5   2  14    1.23    0.32
  -4  -2  14    1.22    0.36
   4  -2 -14    1.41    0.50
  -4   2  14    0.60    0.24
   4   2 -14    0.84    0.35
   3  -2 -14    1.78    0.51
  -3  -2  14    1.44    0.40
   3   2 -14    1.77    0.51
  -3   2  14    1.06    0.31
  -2  -2  14    0.08    0.19
   2  -2 -14    0.16    0.23
   2   2 -14    0.11    0.24
  -2   2  14    0.09    0.20
   1  -2 -14    0.68    0.36
  -1  -2  14    1.06    0.34
  -1   2  14    1.47    0.35
   1   2 -14    1.57    0.45
   0  -2  14    0.21    0.23
   0  -2 -14    0.19    0.25
   0   2  14    0.24    0.18
   0   2 -14    0.22    0.24
  -1  -2 -14    0.22    0.26
   1  -2  14   -0.06    0.20
   1   2  14    0.19    0.19
  -1   2 -14    0.68    0.31
  -2  -2 -14    0.18    0.26
   2  -2  14    0.13    0.24
   2   2  14    0.08    0.23
  -2   2 -14    0.30    0.27
   3  -2  14    0.74    0.34
  -3  -2 -14    0.54    0.35
  -3   2 -14    0.12    0.24
   3   2  14    0.24    0.23
  -4  -2 -14    1.90    0.55
   4  -2  14    0.53    0.33
   4   2  14    0.52    0.32
  -4   2 -14    0.81    0.33
   5  -2  14    0.57    0.36
   5   2  14    0.65    0.31
  -5   2 -14    0.15    0.25
 -12   3  14    0.34    0.24
  12   3 -14    0.42    0.43
  11  -3 -14   -0.20    0.37
 -11  -3  14    0.23    0.25
 -11   3  14    0.36    0.25
  11   3 -14    0.16    0.39
 -10  -3  14    0.13    0.25
  10  -3 -14   -0.04    0.31
  10   3 -14    0.05    0.39
 -10   3  14    0.03    0.20
   9  -3 -14    1.14    0.53
  -9  -3  14    0.51    0.29
  -9   3  14    1.04    0.33
   9   3 -14    0.74    0.46
  -8  -3  14    0.52    0.30
   8  -3 -14    0.35    0.38
  -8   3  14    0.43    0.23
   8   3 -14    0.54    0.36
  -7  -3  14    0.12    0.23
   7  -3 -14    0.35    0.33
   7   3 -14    0.49    0.35
  -7   3  14    0.29    0.24
  -6  -3  14    2.47    0.49
   6  -3 -14    1.86    0.54
   6   3 -14    1.68    0.52
  -6   3  14    1.86    0.38
  -5  -3  14    0.74    0.28
   5  -3 -14    0.27    0.32
  -5   3  14    0.79    0.27
   5   3 -14    0.45    0.30
   4  -3 -14    0.35    0.30
  -4  -3  14    0.04    0.17
  -4   3  14    0.32    0.20
   4   3 -14   -0.03    0.22
   3  -3 -14    0.15    0.30
  -3  -3  14   -0.06    0.20
   3   3 -14    0.22    0.29
  -3   3  14    0.15    0.17
   2  -3 -14    0.03    0.24
  -2  -3  14    0.19    0.21
   2   3 -14    0.93    0.40
  -2   3  14    1.13    0.32
  -1  -3  14   -0.12    0.19
   1  -3 -14    0.32    0.27
  -1   3  14    0.04    0.17
   1   3 -14   -0.07    0.19
   0  -3 -14    0.21    0.30
   0  -3  14    0.95    0.33
   0   3  14    0.21    0.19
   0   3 -14    0.40    0.27
   1  -3  14    0.02    0.22
  -1  -3 -14    0.34    0.32
   1   3  14   -0.02    0.18
  -1   3 -14    0.27    0.28
  -2  -3 -14   -0.05    0.24
   2  -3  14    0.39    0.26
   2   3  14    0.05    0.23
  -2   3 -14   -0.18    0.24
  -3  -3 -14    0.43    0.34
   3  -3  14    0.34    0.29
   3   3  14    0.19    0.24
  -3   3 -14    0.26    0.26
 -10   4  14    0.11    0.21
  -9  -4  14    0.07    0.26
   9  -4 -14   -0.27    0.33
   9   4 -14    0.15    0.39
  -9   4  14    0.14    0.21
  -8  -4  14    0.54    0.30
   8  -4 -14    1.01    0.48
   8   4 -14    1.31    0.50
  -8   4  14    0.79    0.29
   7  -4 -14    1.59    0.57
  -7  -4  14    0.75    0.33
   7   4 -14    1.71    0.53
  -7   4  14    1.66    0.39
   6  -4 -14    1.13    0.45
  -6  -4  14    0.63    0.32
   6   4 -14    0.75    0.43
  -6   4  14    1.10    0.32
   5  -4 -14    0.46    0.30
  -5  -4  14    0.50    0.30
  -5   4  14    0.49    0.23
   5   4 -14    0.77    0.35
   4  -4 -14    0.00    0.23
  -4  -4  14    0.55    0.31
   4   4 -14    0.09    0.26
  -4   4  14    0.37    0.21
   3  -4 -14    0.16    0.28
  -3  -4  14    0.32    0.26
   3   4 -14    0.41    0.31
  -3   4  14    0.04    0.17
   2  -4 -14    0.13    0.26
  -2  -4  14    0.02    0.21
   2   4 -14    0.04    0.25
  -2   4  14    0.29    0.21
   1  -4 -14    0.08    0.27
  -1  -4  14   -0.08    0.22
   1   4 -14   -0.16    0.24
  -1   4  14    0.03    0.17
   0  -4  14   -0.20    0.21
   0  -4 -14    0.23    0.28
   0   4 -14    0.42    0.27
   0   4  14    0.11    0.19
  -1  -4 -14   -0.12    0.25
   1  -4  14    0.17    0.25
   1   4  14   -0.04    0.16
  -1   4 -14   -0.20    0.19
 -13   0  15   -0.02    0.32
  13   0 -15   -0.15    0.39
  12   0 -15    0.22    0.35
 -12   0  15    0.30    0.30
 -11   0  15    0.95    0.40
  11   0 -15    0.61    0.46
  10   0 -15    0.22    0.40
 -10   0  15    0.16    0.25
   9   0 -15   -0.08    0.32
  -9   0  15    0.22    0.26
  -8   0  15   -0.01    0.22
   8   0 -15   -0.12    0.31
  -7   0  15    0.07    0.22
   7   0 -15    0.00    0.30
   6   0 -15   -0.31    0.25
  -6   0  15    0.00    0.19
   5   0 -15    0.73    0.41
  -5   0  15    0.47    0.26
  -4   0  15    0.21    0.22
   4   0 -15    0.42    0.39
  -3   0  15    4.28    0.66
   3   0 -15    5.99    0.91
   2   0 -15   12.00    1.14
  -2   0  15   10.15    0.96
  -1   0  15    0.60    0.28
   1   0 -15    1.35    0.47
   0   0  15    0.49    0.32
   0   0 -15    0.47    0.34
  -1   0 -15    0.33    0.31
   1   0  15    0.01    0.21
   2   0  15    0.72    0.34
  -2   0 -15   -0.06    0.29
   3   0  15   -0.10    0.29
  -3   0 -15    0.39    0.32
  -4   0 -15    0.33    0.32
   4   0  15    0.00    0.25
 -12  -1  15    0.24    0.35
  12  -1 -15    0.92    0.53
  12   1 -15    0.31    0.44
  12   1 -15    0.57    0.48
 -12   1  15    0.37    0.29
  11  -1 -15    0.21    0.42
 -11  -1  15    0.70    0.35
  11   1 -15    0.16    0.41
  11   1 -15    0.22    0.43
 -11   1  15    0.07    0.30
 -11   1  15   -0.03    0.23
 -10  -1  15    0.81    0.37
  10  -1 -15    0.32    0.41
  10   1 -15    0.26    0.39
  10   1 -15    0.50    0.41
 -10   1  15    0.49    0.30
 -10   1  15    0.48    0.28
  -9  -1  15    1.38    0.41
   9  -1 -15    1.31    0.57
  -9   1  15    0.50    0.35
   9   1 -15    1.29    0.53
  -9   1  15    0.91    0.32
   9   1 -15    1.46    0.52
   8  -1 -15    0.18    0.32
  -8  -1  15    0.05    0.25
  -8   1  15    0.08    0.19
   8   1 -15    0.22    0.28
   8   1 -15    0.03    0.31
  -8   1  15    0.05    0.23
   7  -1 -15    0.00    0.30
  -7  -1  15    0.05    0.22
  -7   1  15   -0.09    0.16
   7   1 -15    0.00    0.25
  -7   1  15   -0.27    0.21
   7   1 -15    0.36    0.33
   6  -1 -15    0.08    0.27
  -6  -1  15    0.65    0.32
   6   1 -15    0.27    0.34
   6   1 -15   -0.05    0.17
  -6   1  15    0.10    0.25
  -6   1  15    0.18    0.13
  -5  -1  15    0.03    0.20
   5  -1 -15    0.14    0.28
  -5   1  15   -0.13    0.20
   5   1 -15    0.08    0.28
  -5   1  15   -0.01    0.06
   5   1 -15    0.10    0.11
   4  -1 -15    0.17    0.28
  -4  -1  15    0.18    0.25
   4   1 -15    0.06    0.10
   4   1 -15    0.13    0.29
  -4   1  15    0.23    0.25
  -4   1  15   -0.03    0.06
  -3  -1  15   -0.05    0.20
   3  -1 -15    0.03    0.28
  -3   1  15    0.00    0.23
  -3   1  15    0.03    0.09
   3   1 -15   -0.18    0.21
   3   1 -15    0.01    0.13
   2  -1 -15    0.30    0.31
  -2  -1  15    0.18    0.26
   2   1 -15   -0.05    0.23
  -2   1  15   -0.10    0.20
   2   1 -15    0.29    0.27
  -2   1  15    0.15    0.20
  -1  -1  15    0.06    0.23
   1  -1 -15   -0.13    0.25
   1   1 -15   -0.21    0.21
  -1   1  15    0.38    0.27
   1   1 -15    0.05    0.26
  -1   1  15    0.29    0.23
   0  -1  15    1.10    0.39
   0  -1 -15    0.59    0.37
   0   1  15    0.39    0.26
   0   1  15    0.41    0.27
   0   1 -15    1.01    0.39
   0   1 -15    1.04    0.43
   1  -1  15    0.18    0.27
  -1  -1 -15    0.20    0.29
   1   1  15   -0.13    0.22
  -1   1 -15   -0.09    0.27
  -1   1 -15    0.13    0.23
   1   1  15   -0.11    0.20
   2  -1  15    0.07    0.27
  -2  -1 -15    0.06    0.31
  -2   1 -15    0.29    0.27
  -2   1 -15    0.27    0.36
   2   1  15    0.05    0.22
   2   1  15    0.54    0.34
   3  -1  15    0.07    0.22
  -3  -1 -15   -0.08    0.27
  -3   1 -15   -0.06    0.22
   3   1  15    0.35    0.29
   3   1  15    0.07    0.23
  -3   1 -15    0.00    0.35
  -4  -1 -15    0.70    0.42
   4  -1  15    0.52    0.38
  -4   1 -15    0.12    0.35
   4   1  15    0.22    0.31
  12  -2 -15   -0.08    0.35
 -12  -2  15   -0.01    0.28
 -12   2  15    0.00    0.25
  12   2 -15    0.17    0.39
  11  -2 -15    0.07    0.36
 -11  -2  15    0.24    0.26
 -11   2  15   -0.13    0.17
  11   2 -15   -0.37    0.33
  10  -2 -15   -0.02    0.33
 -10  -2  15    0.08    0.26
 -10   2  15   -0.16    0.17
  10   2 -15   -0.17    0.33
  -9  -2  15    0.43    0.31
   9  -2 -15    0.09    0.34
  -9   2  15    0.51    0.26
   9   2 -15    0.22    0.40
   8  -2 -15    0.58    0.41
  -8  -2  15    0.06    0.21
   8   2 -15    0.08    0.27
  -8   2  15    0.11    0.22
  -7  -2  15    2.32    0.50
   7  -2 -15    2.78    0.70
   7   2 -15    2.00    0.59
  -7   2  15    2.03    0.40
  -6  -2  15    1.35    0.40
   6  -2 -15    1.29    0.49
  -6   2  15    1.49    0.36
   6   2 -15    1.20    0.46
  -5  -2  15    1.36    0.42
   5  -2 -15    0.21    0.33
   5   2 -15    1.37    0.46
  -5   2  15    0.53    0.25
  -4  -2  15    0.73    0.30
   4  -2 -15    0.17    0.30
   4   2 -15    0.57    0.34
  -4   2  15    0.24    0.20
  -3  -2  15   -0.01    0.19
   3  -2 -15    0.30    0.30
  -3   2  15    0.54    0.23
   3   2 -15    0.42    0.34
  -2  -2  15   -0.07    0.19
   2  -2 -15    0.28    0.31
  -2   2  15    0.28    0.20
   2   2 -15    0.23    0.28
   1  -2 -15    0.04    0.26
  -1  -2  15    0.14    0.21
   1   2 -15    0.61    0.30
  -1   2  15    0.23    0.19
   0  -2 -15    0.56    0.32
   0  -2  15    0.69    0.31
   0   2 -15    0.32    0.31
   0   2  15   -0.01    0.20
  -1  -2 -15    0.64    0.35
   1  -2  15    0.16    0.23
  -1   2 -15    0.64    0.34
   1   2  15    0.47    0.30
   2  -2  15    0.09    0.23
  -2  -2 -15    0.18    0.26
  -2   2 -15    0.00    0.23
   2   2  15    0.06    0.21
   3  -2  15    0.47    0.30
  -3  -2 -15    0.31    0.34
   3   2  15   -0.10    0.20
  -3   2 -15    0.28    0.30
  10  -3 -15    0.06    0.36
 -10  -3  15    0.15    0.26
 -10   3  15    0.18    0.19
  10   3 -15    0.02    0.32
   9  -3 -15    0.38    0.44
  -9  -3  15   -0.16    0.20
   9   3 -15    0.60    0.46
  -9   3  15   -0.18    0.18
  -8  -3  15    0.43    0.27
   8  -3 -15    0.60    0.43
  -8   3  15    0.50    0.26
   8   3 -15    0.51    0.41
   7  -3 -15    0.50    0.38
  -7  -3  15    0.14    0.22
  -7   3  15    0.95    0.31
   7   3 -15    0.52    0.38
   6  -3 -15    0.40    0.31
  -6  -3  15    0.07    0.19
   6   3 -15    0.45    0.33
  -6   3  15    0.12    0.19
   5  -3 -15    0.11    0.25
  -5  -3  15   -0.04    0.20
  -5   3  15    0.04    0.16
   5   3 -15    0.00    0.28
  -4  -3  15    0.15    0.24
   4  -3 -15    1.10    0.45
   4   3 -15    0.44    0.38
  -4   3  15    0.39    0.23
   3  -3 -15   -0.01    0.26
  -3  -3  15    0.24    0.25
   3   3 -15    0.40    0.37
  -3   3  15    0.24    0.21
   2  -3 -15    0.11    0.25
  -2  -3  15    0.48    0.29
  -2   3  15    0.19    0.22
   2   3 -15    0.08    0.26
  -1  -3  15    0.58    0.32
   1  -3 -15    0.14    0.27
  -1   3  15    0.18    0.19
   1   3 -15    0.34    0.29
   0  -3  15    0.87    0.37
   0  -3 -15    0.13    0.29
   0   3  15    0.08    0.19
   0   3 -15    0.64    0.37
  -1  -3 -15    0.45    0.38
   1  -3  15    0.20    0.26
  -1   3 -15    0.16    0.30
   1   3  15    0.01    0.24
   2   3  15   -0.21    0.16
   7  -4 -15    1.29    0.49
  -7  -4  15    1.19    0.40
  -7   4  15    1.18    0.35
   7   4 -15    1.46    0.50
   6  -4 -15   -0.07    0.34
  -6  -4  15    0.09    0.26
   6   4 -15    0.35    0.32
  -6   4  15    0.13    0.19
   5  -4 -15    0.43    0.36
  -5  -4  15    0.17    0.27
  -5   4  15    0.25    0.20
   5   4 -15    0.67    0.37
  -4  -4  15    0.11    0.22
   4  -4 -15    0.10    0.30
  -4   4  15    0.13    0.22
   4   4 -15   -0.17    0.23
  -3  -4  15    0.00    0.23
   3  -4 -15   -0.27    0.28
   3   4 -15   -0.01    0.23
  -3   4  15   -0.09    0.19
   2  -4 -15    0.28    0.33
  -2  -4  15   -0.17    0.23
   2   4 -15   -0.03    0.26
  -2   4  15    0.18    0.19
  -1  -4  15    0.15    0.26
  -1   4  15    0.23    0.20
  11   0 -16   -0.09    0.39
 -11   0  16    0.03    0.28
  10   0 -16   -0.19    0.29
 -10   0  16    0.16    0.30
  -9   0  16    0.18    0.29
   9   0 -16    0.06    0.31
   8   0 -16    0.30    0.37
  -8   0  16    0.21    0.25
   7   0 -16    0.85    0.50
  -7   0  16    1.03    0.37
  -6   0  16   -0.17    0.21
   6   0 -16   -0.01    0.25
  -5   0  16    0.08    0.24
   5   0 -16   -0.10    0.20
   4   0 -16   -0.03    0.23
  -4   0  16    0.04    0.22
   3   0 -16    0.34    0.35
  -3   0  16    0.21    0.25
   2   0 -16   -0.18    0.23
  -2   0  16    0.18    0.23
  -1   0  16    0.10    0.22
   1   0 -16    0.33    0.33
   0   0  16    0.19    0.27
   0   0 -16    0.20    0.32
  -1   0 -16    0.15    0.32
   1   0  16    0.31    0.30
   2   0  16    0.20    0.32
  -2   0 -16    0.16    0.27
  11  -1 -16   -0.45    0.34
 -11  -1  16    0.13    0.33
 -11   1  16    0.30    0.27
  11   1 -16   -0.29    0.43
 -10  -1  16    0.08    0.29
  10  -1 -16    0.00    0.39
 -10   1  16   -0.13    0.27
 -10   1  16   -0.22    0.22
  10   1 -16   -0.23    0.32
  10   1 -16   -0.45    0.32
  -9  -1  16    0.04    0.25
   9  -1 -16    0.19    0.37
  -9   1  16    0.06    0.21
   9   1 -16    0.47    0.45
   9   1 -16    0.55    0.44
  -9   1  16    0.23    0.30
   8  -1 -16    0.29    0.37
  -8  -1  16    0.10    0.28
  -8   1  16    0.27    0.23
  -8   1  16    0.37    0.31
   8   1 -16    0.04    0.33
   8   1 -16    0.43    0.38
   7  -1 -16    0.59    0.43
  -7  -1  16    0.97    0.37
   7   1 -16    0.16    0.30
   7   1 -16    0.56    0.39
  -7   1  16    0.76    0.29
  -7   1  16    0.55    0.30
  -6  -1  16    0.29    0.27
   6  -1 -16   -0.08    0.25
  -6   1  16    0.42    0.28
  -6   1  16    0.22    0.32
   6   1 -16    0.24    0.35
   6   1 -16    0.14    0.32
   5  -1 -16    0.10    0.26
  -5  -1  16    0.52    0.31
  -5   1  16   -0.13    0.21
   5   1 -16    0.14    0.27
  -5   1  16    0.09    0.28
   5   1 -16   -0.28    0.28
   4  -1 -16    0.81    0.42
  -4  -1  16    0.83    0.35
   4   1 -16    0.15    0.35
  -4   1  16    0.72    0.35
  -4   1  16    0.77    0.32
   4   1 -16    0.78    0.38
  -3  -1  16    3.59    0.63
   3  -1 -16    3.42    0.74
  -3   1  16    1.11    0.36
  -3   1  16    2.44    0.53
   3   1 -16    2.58    0.59
   3   1 -16    3.12    0.69
  -2  -1  16    1.81    0.45
   2  -1 -16    1.72    0.53
   2   1 -16    2.31    0.55
   2   1 -16    2.21    0.56
  -2   1  16    0.61    0.32
  -1  -1  16    0.37    0.29
   1  -1 -16    0.03    0.31
   1   1 -16   -0.08    0.23
  -1   1  16    0.13    0.21
   1   1 -16    0.21    0.32
  -1   1  16    0.10    0.25
   0  -1 -16    1.12    0.46
   0  -1  16    0.60    0.32
   0   1  16    0.27    0.25
   0   1 -16    1.59    0.48
   0   1  16    0.43    0.33
   0   1 -16    0.83    0.43
  -1  -1 -16    0.78    0.41
   1  -1  16    0.63    0.39
   1   1  16   -0.07    0.24
  -1   1 -16    0.30    0.37
  -1   1 -16    0.02    0.30
   1   1  16    0.42    0.37
   2  -1  16    0.21    0.31
  -2  -1 -16   -0.06    0.28
   2   1  16    0.16    0.28
  -2   1 -16    0.52    0.39
  10  -2 -16    0.58    0.85
 -10  -2  16    0.59    0.35
 -10   2  16    0.63    0.30
  10   2 -16    0.39    0.46
  -9  -2  16   -0.12    0.24
   9  -2 -16    0.04    0.30
   9   2 -16    0.01    0.37
  -9   2  16   -0.07    0.20
  -8  -2  16   -0.28    0.21
   8  -2 -16   -0.02    0.32
  -8   2  16    0.08    0.19
   8   2 -16   -0.06    0.25
   7  -2 -16   -0.01    0.31
  -7  -2  16    0.40    0.31
   7   2 -16   -0.01    0.28
  -7   2  16   -0.01    0.21
  -6  -2  16    0.04    0.23
   6  -2 -16   -0.04    0.27
   6   2 -16    0.00    0.29
  -6   2  16    0.15    0.20
   5  -2 -16    0.31    0.28
  -5  -2  16    0.41    0.31
  -5   2  16    0.25    0.21
   5   2 -16    0.40    0.31
  -4  -2  16    0.53    0.33
   4  -2 -16    0.13    0.27
   4   2 -16    0.51    0.34
  -4   2  16    0.40    0.23
   3  -2 -16    0.18    0.34
  -3  -2  16    0.15    0.24
  -3   2  16    0.00    0.20
   3   2 -16   -0.04    0.30
  -2  -2  16    0.47    0.32
   2  -2 -16    0.26    0.34
   2   2 -16    0.32    0.31
  -2   2  16    0.70    0.30
   1  -2 -16    0.07    0.26
  -1  -2  16    0.03    0.22
   1   2 -16   -0.08    0.21
  -1   2  16    0.11    0.22
   0  -2 -16   -0.26    0.26
   0  -2  16   -0.29    0.24
   0   2 -16   -0.16    0.28
   0   2  16   -0.21    0.20
   1  -2  16    0.90    0.39
  -1  -2 -16    0.88    0.39
   1   2  16    0.47    0.31
  -1   2 -16    1.58    0.50
  -8  -3  16    0.30    0.26
   8  -3 -16    0.13    0.35
   8   3 -16    0.00    0.26
  -8   3  16    0.18    0.20
   7  -3 -16   -0.07    0.34
  -7  -3  16    0.41    0.28
   7   3 -16    0.02    0.29
  -7   3  16   -0.15    0.20
  -6  -3  16    0.65    0.36
   6  -3 -16    1.50    0.51
   6   3 -16    0.55    0.42
  -6   3  16    0.48    0.27
  -5  -3  16    0.20    0.27
   5  -3 -16    0.67    0.39
   5   3 -16    1.00    0.43
  -5   3  16    0.19    0.24
   4  -3 -16    0.08    0.32
  -4  -3  16    0.28    0.27
  -4   3  16    0.12    0.21
   4   3 -16   -0.03    0.25
   3  -3 -16    0.06    0.32
  -3  -3  16    0.24    0.26
   3   3 -16   -0.17    0.23
  -3   3  16    0.02    0.23
   2  -3 -16    0.30    0.34
  -2  -3  16    1.24    0.42
  -2   3  16    0.71    0.29
   2   3 -16    0.81    0.42
   1  -3 -16    0.22    0.31
  -1  -3  16    0.16    0.25
  -1   3  16    0.11    0.21
   1   3 -16    0.47    0.32
 -10   0  17   -0.35    0.24
  10   0 -17   -0.02    0.37
  -9   0  17    0.08    0.33
   9   0 -17    0.53    0.48
   8   0 -17    1.41    0.51
  -8   0  17    1.14    0.39
   7   0 -17    1.10    0.49
  -7   0  17    0.68    0.38
  -6   0  17   -0.15    0.25
   6   0 -17    0.13    0.30
  -5   0  17    0.08    0.27
   5   0 -17    0.09    0.36
   4   0 -17   -0.07    0.30
  -4   0  17   -0.08    0.23
   3   0 -17    0.63    0.35
  -3   0  17    0.64    0.33
  -2   0  17   -0.17    0.20
   2   0 -17    0.00    0.32
   1   0 -17    2.90    0.68
  -1   0  17    2.37    0.54
   0   0  17    1.67    0.50
   0   0 -17    1.36    0.52
   9  -1 -17    0.41    0.46
  -9  -1  17    0.40    0.33
  -9   1  17    0.17    0.28
   9   1 -17    0.78    0.49
  -8  -1  17    1.30    0.46
   8  -1 -17    0.88    0.48
   8   1 -17    0.73    0.48
   8   1 -17    0.48    0.46
  -8   1  17    0.44    0.29
  -7  -1  17    1.05    0.41
   7  -1 -17    0.56    0.44
  -7   1  17    0.75    0.39
   7   1 -17    0.65    0.43
  -7   1  17    0.47    0.28
   7   1 -17    0.58    0.42
   6  -1 -17    0.54    0.39
  -6  -1  17    0.72    0.38
   6   1 -17    0.90    0.48
   6   1 -17    0.13    0.36
  -6   1  17    0.78    0.34
  -6   1  17    1.32    0.44
  -5  -1  17    0.13    0.30
   5  -1 -17    0.22    0.40
  -5   1  17    0.16    0.26
   5   1 -17    0.33    0.43
  -5   1  17    0.10    0.26
   5   1 -17   -0.12    0.30
  -4  -1  17    0.20    0.31
   4  -1 -17    0.29    0.38
  -4   1  17   -0.04    0.25
   4   1 -17   -0.01    0.34
   4   1 -17    0.28    0.37
  -4   1  17    0.17    0.30
  -3  -1  17    0.05    0.26
   3  -1 -17    1.04    0.53
  -3   1  17    0.05    0.24
  -3   1  17    0.13    0.28
   3   1 -17    0.21    0.34
   3   1 -17    0.32    0.37
  -2  -1  17    0.26    0.32
   2  -1 -17    0.17    0.35
   2   1 -17    0.19    0.35
  -2   1  17    0.19    0.25
  -2   1  17    0.34    0.31
   2   1 -17    0.63    0.43
   1  -1 -17   -0.23    0.28
  -1  -1  17    0.22    0.32
  -1   1  17   -0.02    0.28
   1   1 -17    0.35    0.39
  -8  -2  17    0.12    0.26
   8  -2 -17    0.07    0.31
   8   2 -17   -0.07    0.35
  -8   2  17    0.07    0.25
   7  -2 -17    0.35    0.97
  -7  -2  17    0.06    0.30
   7   2 -17   -0.32    0.26
  -7   2  17   -0.09    0.18
  -6  -2  17    0.64    0.33
   6  -2 -17    0.77    0.67
   6   2 -17    0.26    0.35
  -6   2  17    1.22    0.37
   5  -2 -17    0.66    0.52
  -5  -2  17   -0.23    0.22
  -5   2  17    0.03    0.25
   5   2 -17   -0.09    0.32
   4  -2 -17    0.21    0.54
  -4  -2  17   -0.18    0.22
   4   2 -17    0.22    0.36
  -4   2  17   -0.12    0.23
  -3  -2  17    0.66    0.35
   3  -2 -17    1.00    0.69
   3   2 -17    0.80    0.43
  -3   2  17    0.75    0.31
  -2  -2  17    0.27    0.32
   2  -2 -17    0.30    0.30
   2   2 -17    0.64    0.40
  -2   2  17    0.26    0.22
   0   0   0    0.00    0.00
;
_shelx_hkl_checksum               84533
